# Supplementary material
Source: publisher figshare collection journal article supplement (https://sage.figshare.com/ndownloader/files/14478683)
Supplement: Supplementary file 1 [file 14478683]

## Sheet: female_ DODR
		p.value.table.HANOVA	p.value.table.HarmNoisePred1	p.value.table.HarmNoisePred2	p.value.table.HarmScaleTest	p.value.table.robustDODR	p.value.table.robustHarmScaleTest	p.value.table.meta.p.val	details.HANOVA.p.value	details.HANOVA.F	details.HANOVA.diff	details.HarmNoisePred1.p.value	details.HarmNoisePred1.F	details.HarmNoisePred2.p.value	details.HarmNoisePred2.F	details.HarmScaleTest.p.value	details.HarmScaleTest.F	details.robustDODR.p.value	details.robustDODR.F	details.robustDODR.diff	details.robustHarmScaleTest.p.value	details.robustHarmScaleTest.score	details.robustHarmScaleTest.factor
1	FBgn0000003_7SLRNA:CR32864	0.580966	0.676779	0.480695	0.801744	0.416492	0.976191	0.960529	0.580966	0.549981	0.589518	0.676779	0.825546	0.480695	1.02504	0.801744	1.11731	0.416492	0.893974	0.310671	0.976191	-0.0298445	0.992278
2	FBgn0000008_a	0.374301	0.00382901	0.997344	0.00548372	0.512604	0.00180339	0.0107717	0.374301	1.0055	0.0877163	0.00382901	3.28556	0.997344	0.299475	0.00548372	3.54249	0.512604	0.678746	0.0789229	0.00180339	3.12084	1.92273
3	FBgn0000014_abd-A	0.0226385	0.125766	0.596082	0.431095	1	0.536823	0.128372	0.0226385	4.14231	2.62617	0.125766	1.64742	0.596082	0.905017	0.431095	1.41707	1	0	1.06e-16	0.536823	-0.617625	0.757127
4	FBgn0000015_Abd-B	0.784956	0.00598804	0.998813	0.0065803	0.699136	0.0664866	0.0353946	0.784956	0.243496	0.239742	0.00598804	3.05559	0.998813	0.267016	0.0065803	3.4418	0.699136	0.360906	0.220826	0.0664866	1.83513	1.98631
5	FBgn0000017_Abl	0.436098	0.507256	0.606838	0.89907	0.524859	0.637638	0.967847	0.436098	0.846113	0.11301	0.507256	0.996272	0.606838	0.894322	0.89907	1.05762	0.524859	0.654386	0.134034	0.637638	0.471003	1.06762
6	FBgn0000018_abo	0.542107	0.0717932	0.965979	0.101916	0.290301	0.152713	0.360459	0.542107	0.621093	0.0873348	0.0717932	1.89375	0.965979	0.459052	0.101916	2.07545	0.290301	1.2731	0.118558	0.152713	1.43001	1.47358
7	FBgn0000022_ac	NA	NA	NA	NA	NA	NA	1	NA	NA	NA	NA	NA	NA	NA	NA	NA	NA	NA	NA	NA	NA	NA
8	FBgn0000024_Ace	0.488203	0.151611	0.91222	0.233663	0.386826	0.29681	0.62712	0.488203	0.729115	0.0611429	0.151611	1.56513	0.91222	0.562698	0.233663	1.69725	0.386826	0.971072	0.0625182	0.29681	1.0433	1.21642
9	FBgn0000028_acj6	0.624904	0.00223394	0.999383	0.00258449	0.760513	0.0295075	0.013329	0.624904	0.475336	0.0556674	0.00223394	3.57352	0.999383	0.244391	0.00258449	3.97405	0.760513	0.275513	0.0339774	0.0295075	2.17664	1.95313
10	FBgn0000032_Acph-1	0.44944	0.0191927	0.989898	0.0271144	0.389119	0.0837216	0.10977	0.44944	0.814813	0.060682	0.0191927	2.49008	0.989898	0.368848	0.0271144	2.70538	0.389119	0.964894	0.0579445	0.0837216	1.72949	1.6527
11	FBgn0000036_nAChRalpha1	0.775682	0.616449	0.594165	0.977432	0.693877	0.706262	0.995532	0.775682	0.25552	0.0848502	0.616449	0.884805	0.594165	0.90693	0.977432	1.01257	0.693877	0.368584	0.0924494	0.706262	-0.376881	0.938213
12	FBgn0000037_mAChR-A	0.159029	0.00203648	0.994508	0.0039981	0.281124	0.0441069	0.0121569	0.159029	1.91958	0.100927	0.00203648	3.62424	0.994508	0.334302	0.0039981	3.72052	0.281124	1.30716	0.0817304	0.0441069	2.01307	1.93953
13	FBgn0000038_nAChRbeta1	0.0909784	0.120696	0.786219	0.291269	0.0890382	0.835279	0.42852	0.0909784	2.53587	0.0915608	0.120696	1.66549	0.786219	0.715692	0.291269	1.5971	0.0890382	2.55999	0.0899144	0.835279	0.207936	1.12144
14	FBgn0000039_nAChRalpha2	0.978494	0.214915	0.923231	0.283973	0.872167	0.396924	0.765847	0.978494	0.0217519	0.0125609	0.214915	1.40988	0.923231	0.54537	0.283973	1.60865	0.872167	0.137211	0.0276984	0.396924	0.847128	1.25614
15	FBgn0000042_Act5C	0.86838	0.680509	0.545428	0.863003	0.940982	0.544565	0.991076	0.86838	0.14159	0.0307414	0.680509	0.821889	0.545428	0.95628	0.863003	1.0792	0.940982	0.0609171	0.0327793	0.544565	0.605924	1.10986
16	FBgn0000043_Act42A	0.9056	0.000788698	0.999918	0.000761655	0.724735	0.0142229	0.00456124	0.9056	0.0993868	0.0389514	0.000788698	4.1671	0.999918	0.189659	0.000761655	4.73588	0.724735	0.324371	0.0642049	0.0142229	2.45158	2.21423
17	FBgn0000044_Act57B	0.65183	0.253907	0.86839	0.380194	0.717701	0.848613	0.827513	0.65183	0.43226	0.0959252	0.253907	1.33432	0.86839	0.622669	0.380194	1.47517	0.717701	0.334274	0.0791944	0.848613	-0.190889	0.935141
18	FBgn0000045_Act79B	0.353684	0.0543131	0.961444	0.0868436	0.449012	0.0297961	0.165977	0.353684	1.06488	0.171298	0.0543131	2.01719	0.961444	0.470596	0.0868436	2.14938	0.449012	0.815802	0.139657	0.0297961	2.17279	1.50989
19	FBgn0000046_Act87E	0.569994	0.262025	0.849778	0.406999	0.655513	0.667928	0.838472	0.569994	0.569543	0.113632	0.262025	1.31991	0.849778	0.645303	0.406999	1.44373	0.655513	0.426512	0.0976811	0.667928	0.428994	1.10352
20	FBgn0000047_Act88F	0.0336226	0.0785906	0.737569	0.251693	0.0399718	0.370429	0.18552	0.0336226	3.67487	0.325474	0.0785906	1.85392	0.737569	0.765463	0.251693	1.6635	0.0399718	3.47314	0.32796	0.370429	0.89567	1.23102
21	FBgn0000052_ade2	0.211958	0.0613561	0.931436	0.115542	0.194029	0.173818	0.31608	0.211958	1.60871	0.266168	0.0613561	1.96313	0.931436	0.531563	0.115542	2.01778	0.194029	1.7039	0.23512	0.173818	1.36004	1.42455
22	FBgn0000053_ade3	0.26587	0.00847173	0.990982	0.014058	0.333149	0.173696	0.0497659	0.26587	1.36641	0.257014	0.00847173	2.88235	0.990982	0.361982	0.014058	3.03752	0.333149	1.12775	0.19494	0.173696	1.36042	1.38693
23	FBgn0000055_Adh	0.0739043	0.131692	0.746117	0.334955	0.15199	0.731708	0.369137	0.0739043	2.76937	0.252947	0.131692	1.62717	0.746117	0.756871	0.334955	1.53331	0.15199	1.96894	0.224918	0.731708	0.342854	1.18159
24	FBgn0000056_Adhr	0.09576	0.0326705	0.923468	0.0783144	0.139001	0.0755811	0.180693	0.09576	2.47868	0.323895	0.0326705	2.24526	0.923468	0.544983	0.0783144	2.1974	0.139001	2.06666	0.284966	0.0755811	1.77692	1.55815
25	FBgn0000057_adp	0.877952	0.0878684	0.973992	0.109078	0.84832	0.0550469	0.28803	0.877952	0.130558	0.0412496	0.0878684	1.80486	0.973992	0.435952	0.109078	2.04421	0.84832	0.165129	0.0580982	0.0550469	1.91851	1.40198
26	FBgn0000061_al	0.488498	0.871232	0.211045	0.333915	0.568046	0.143488	0.605179	0.488498	0.72849	0.187769	0.871232	0.619096	0.211045	1.41804	0.333915	1.53474	0.568046	0.573057	0.160484	0.143488	-1.46292	0.855446
27	FBgn0000063_Mps1	0.835835	0.129038	0.955145	0.168357	0.692213	0.205222	0.563489	0.835835	0.180074	0.0707019	0.129038	1.63612	0.955145	0.485291	0.168357	1.84602	0.692213	0.371027	0.114203	0.205222	1.26681	1.30634
28	FBgn0000064_Ald	0.361523	6.56e-05	0.999923	8.8e-05	0.381763	0.00198357	0.000393583	0.361523	1.04189	0.0912254	6.56e-05	5.82107	0.999923	0.188046	8.8e-05	6.29894	0.381763	0.984845	0.0774557	0.00198357	3.09268	2.64744
29	FBgn0000071_Ama	0.935684	0.934398	0.186268	0.244775	0.984665	0.221473	0.709673	0.935684	0.0665806	0.1484	0.934398	0.526354	0.186268	1.47389	0.244775	1.67616	0.984665	0.0154597	0.043986	0.221473	-1.22262	0.682881
30	FBgn0000075_amd	0.396717	0.204428	0.856683	0.340377	0.275592	0.175043	0.684799	0.396717	0.944698	0.144891	0.204428	1.43233	0.856683	0.63705	0.340377	1.52596	0.275592	1.32825	0.152171	0.175043	1.35618	1.22118
31	FBgn0000077_amx	0.691474	0.0313331	0.990127	0.0390876	0.729083	0.00534644	0.0316529	0.691474	0.372113	0.107531	0.0313331	2.26425	0.990127	0.367443	0.0390876	2.52667	0.729083	0.318301	0.0933722	0.00534644	2.78538	1.47533
32	FBgn0000078_Amy-d	0.327571	0.000325773	0.99963	0.000466885	0.700246	0.0676893	0.00195305	0.327571	1.14552	0.983834	0.000325773	4.71412	0.99963	0.228599	0.000466885	5.06445	0.700246	0.359292	0.150307	0.0676893	-1.82707	0.641212
33	FBgn0000079_Amy-p	0.16118	0.066698	0.908489	0.136707	0.0178491	0.21962	0.102428	0.16118	1.90495	1.6858	0.066698	1.92623	0.908489	0.568307	0.136707	1.94084	0.0178491	4.42738	0.47541	0.21962	-1.22754	0.532728
34	FBgn0000083_AnxB9	0.802179	0.000283645	0.999964	0.000279824	0.862683	0.00352781	0.00167777	0.802179	0.221557	0.0265719	0.000283645	4.80367	0.999964	0.172008	0.000279824	5.42371	0.862683	0.148217	0.019052	0.00352781	2.91756	2.35668
35	FBgn0000084_AnxB10	0.160966	0.171025	0.79137	0.355814	0.100317	0.449539	0.469682	0.160966	1.90639	0.149085	0.171025	1.51183	0.79137	0.710267	0.355814	1.50563	0.100317	2.42688	0.175945	0.449539	0.756184	1.13818
36	FBgn0000092_CG2650	0.315471	0.349253	0.704938	0.637502	0.3888	0.643449	0.897115	0.315471	1.1852	0.22238	0.349253	1.18527	0.704938	0.797873	0.637502	1.23157	0.3888	0.965753	0.214873	0.643449	0.462882	1.06239
37	FBgn0000094_Anp	0.234004	0.990141	0.00779971	0.0135322	1	0.0245493	0.0458952	0.234004	1.5026	1.99307	0.990141	0.367358	0.00779971	2.92322	0.0135322	3.05727	1	0	4.07e-17	0.0245493	2.24842	44.2272
38	FBgn0000097_aop	0.293926	0.414951	0.632628	0.777523	0.288102	0.650924	0.869831	0.293926	1.25997	0.0743382	0.414951	1.10071	0.632628	0.868853	0.777523	1.13296	0.288102	1.28116	0.0736289	0.650924	0.452479	1.1934
39	FBgn0000100_RpLP0	0.693521	0.0421417	0.98608	0.0534571	0.824587	0.0717937	0.227662	0.693521	0.369107	0.0933824	0.0421417	2.13043	0.98608	0.389483	0.0534571	2.37681	0.824587	0.193741	0.0757973	0.0717937	1.80042	1.44141
40	FBgn0000108_Appl	0.34144	0.00176099	0.998494	0.00256409	0.235503	0.0143989	0.0105195	0.34144	1.10189	0.0503927	0.00176099	3.70467	0.998494	0.276034	0.00256409	3.97874	0.235503	1.49577	0.053703	0.0143989	2.44716	2.10174
41	FBgn0000109_Aprt	0.132928	0.0743785	0.884781	0.161619	0.100419	0.0686371	0.3473	0.132928	2.11568	0.158333	0.0743785	1.87817	0.884781	0.601554	0.161619	1.86459	0.100419	2.42575	0.177306	0.0686371	1.8208	1.26388
42	FBgn0000114_bru1	0.762335	0.96598	0.0964263	0.125967	0.641746	0.220848	0.455771	0.762335	0.273089	0.0488027	0.96598	0.459049	0.0964263	1.76404	0.125967	1.97822	0.641746	0.448169	0.0575677	0.220848	-1.22428	0.749385
43	FBgn0000115_Arl1	0.699022	0.177089	0.921035	0.25066	0.560885	0.392988	0.68946	0.699022	0.361071	0.0493091	0.177089	1.49637	0.921035	0.548927	0.25066	1.66537	0.560885	0.586086	0.0551457	0.392988	0.854211	1.26561
44	FBgn0000116_Argk	0.729883	0.0217067	0.994031	0.0260416	0.58559	0.00723874	0.042654	0.729883	0.317189	0.0902612	0.0217067	2.43278	0.994031	0.338704	0.0260416	2.72536	0.58559	0.541851	0.122303	0.00723874	2.68566	1.56765
45	FBgn0000117_arm	0.819144	0.0762656	0.976513	0.0956046	0.834242	0.0533384	0.280272	0.819144	0.200424	0.0623238	0.0762656	1.86713	0.976513	0.427724	0.0956046	2.10492	0.834242	0.181998	0.0510681	0.0533384	1.93217	1.55288
46	FBgn0000119_arr	0.965739	0.260203	0.89864	0.353942	0.749026	0.601262	0.836063	0.965739	0.0348905	0.0163894	0.260203	1.32311	0.89864	0.58258	0.353942	1.50805	0.749026	0.290932	0.0333666	0.601262	0.522587	1.23165
47	FBgn0000120_Arr1	0.608034	0.118011	0.945745	0.167611	0.737186	0.0832837	0.406515	0.608034	0.503326	0.0620503	0.118011	1.67537	0.945745	0.505043	0.167611	1.84804	0.737186	0.307087	0.0550443	0.0832837	1.73194	1.3342
48	FBgn0000121_Arr2	0.664523	0.157216	0.928967	0.223102	0.771204	0.154165	0.633804	0.664523	0.412594	0.0701838	0.157216	1.5491	0.928967	0.535809	0.223102	1.71823	0.771204	0.261379	0.0513247	0.154165	1.42497	1.28375
49	FBgn0000137_ase	0.15039	0.223772	0.725907	0.474845	1	0.729479	0.623888	0.15039	1.9805	1.75502	0.223772	1.39168	0.725907	0.777107	0.474845	1.372	1	2.73e-14	4.25e-16	0.729479	-0.345819	0.803525
50	FBgn0000139_ash2	0.32987	0.0444879	0.966222	0.0721324	0.455907	0.0608968	0.238943	0.32987	1.13816	0.138238	0.0444879	2.10616	0.966222	0.458407	0.0721324	2.23575	0.455907	0.79999	0.126348	0.0608968	1.87424	1.38024
51	FBgn0000140_asp	0.0866206	0.977553	0.00525985	0.013048	0.11082	0.536076	0.031147	0.0866206	2.59081	0.784849	0.977553	0.424157	0.00525985	3.12148	0.013048	3.07621	0.11082	2.31633	0.551166	0.536076	-0.618758	0.817383
52	FBgn0000146_aub	0.535605	0.951754	0.0965121	0.140213	0.818442	0.359526	0.456081	0.535605	0.633512	0.176104	0.951754	0.492681	0.0965121	1.76365	0.140213	1.92929	0.818442	0.20129	0.0860916	0.359526	-0.916269	0.758379
53	FBgn0000147_aurA	0.903776	0.246193	0.901115	0.338059	0.677896	0.343415	0.816531	0.903776	0.101412	0.0738531	0.246193	1.34839	0.901115	0.579061	0.338059	1.52909	0.677896	0.392298	0.111033	0.343415	0.947439	1.27042
54	FBgn0000150_awd	0.91891	0.0333868	0.992772	0.0379607	0.989452	0.316926	0.184327	0.91891	0.0847338	0.0780958	0.0333868	2.23543	0.992772	0.349183	0.0379607	2.54082	0.989452	0.0106064	0.0309177	0.316926	1.0008	1.43898
55	FBgn0000152_Axs	0.446546	0.0258592	0.986104	0.0370744	0.410992	0.017018	0.0978612	0.446546	0.821519	0.12864	0.0258592	2.35199	0.986104	0.389367	0.0370744	2.55226	0.410992	0.907824	0.119132	0.017018	2.38632	1.50382
56	FBgn0000153_b	0.798017	0.457032	0.743592	0.709875	0.851622	0.969809	0.974376	0.798017	0.226814	0.0684909	0.457032	1.05146	0.743592	0.759415	0.709875	1.17869	0.851622	0.161214	0.058981	0.969809	0.0378475	1.0023
57	FBgn0000157_Dll	0.963893	0.230755	0.914182	0.30896	0.961001	0.321126	0.792801	0.963893	0.0368063	0.0229654	0.230755	1.37779	0.914182	0.559698	0.30896	1.57022	0.961001	0.0398167	0.0231297	0.321126	0.992146	1.25512
58	FBgn0000158_bam	0.421921	0.0402036	0.976445	0.0599153	1	0.741304	0.218238	0.421921	0.880489	1.34819	0.0402036	2.15157	0.976445	0.427951	0.0599153	2.32286	1	0	1.73e-16	0.741304	-0.330126	0.803709
59	FBgn0000163_baz	0.942694	0.954954	0.1416	0.180097	0.994096	0.16949	0.599929	0.942694	0.0590951	0.0148986	0.954954	0.485718	0.1416	1.59525	0.180097	1.8154	0.994096	0.00592249	0.00350156	0.16949	-1.37384	0.783967
60	FBgn0000166_bcd	0.268486	0.00450992	0.994918	0.00735073	1	0.167589	0.0267563	0.268486	1.356	2.62005	0.00450992	3.20048	0.994918	0.330279	0.00735073	3.38136	1	0	7e-17	0.167589	1.37999	1.49325
61	FBgn0000173_ben	0.277741	0.0444474	0.960087	0.0761579	0.495225	0.118944	0.238749	0.277741	1.32	0.0849587	0.0444474	2.10657	0.960087	0.47388	0.0761579	2.2104	0.495225	0.714355	0.0583861	0.118944	1.55922	1.48798
62	FBgn0000179_bi	0.34907	0.234737	0.818846	0.407474	0.257097	0.478897	0.799153	0.34907	1.07867	0.0822987	0.234737	1.37005	0.818846	0.680613	0.407474	1.44319	0.257097	1.40213	0.0834008	0.478897	0.708077	1.20965
63	FBgn0000180_bib	0.0170633	0.0570157	0.703776	0.224787	0.0222541	0.104137	0.0981106	0.0170633	4.48173	0.227926	0.0570157	1.99564	0.703776	0.799019	0.224787	1.71482	0.0222541	4.16275	0.203219	0.104137	1.62512	1.32211
64	FBgn0000181_bic	0.771547	0.046443	0.986309	0.0572346	0.744535	0.0168084	0.0967061	0.771547	0.260929	0.0953073	0.046443	2.08693	0.986309	0.388367	0.0572346	2.34447	0.744535	0.297029	0.1073	0.0168084	2.39087	1.43517
65	FBgn0000182_BicC	0.355233	0.99943	0.000647435	0.000908907	1	0.106019	0.00387833	0.355233	1.0603	1.81831	0.99943	0.241858	0.000647435	4.28561	0.000908907	4.62065	1	0	5.39e-17	0.106019	1.61635	5.61884
66	FBgn0000183_BicD	0.397675	0.00482646	0.996987	0.00679925	0.316855	0.0255981	0.0286116	0.397675	0.94218	0.0473505	0.00482646	3.16552	0.996987	0.305102	0.00679925	3.42388	0.316855	1.18059	0.048967	0.0255981	2.23226	1.9642
67	FBgn0000206_boss	0.348963	0.0971976	0.928969	0.160371	0.442042	0.0926532	0.441993	0.348963	1.07899	0.0901952	0.0971976	1.76054	0.928969	0.535806	0.160371	1.86811	0.442042	0.832047	0.0849805	0.0926532	1.68157	1.35127
68	FBgn0000212_brm	0.970668	0.586901	0.659848	0.925853	0.928063	0.760318	0.99503	0.970668	0.0297912	0.0208571	0.586901	0.914191	0.659848	0.842139	0.925853	1.04196	0.928063	0.0747852	0.038112	0.760318	0.305063	1.01575
69	FBgn0000216_Brd	NA	NA	NA	NA	NA	NA	1	NA	NA	NA	NA	NA	NA	NA	NA	NA	NA	NA	NA	NA	NA	NA
70	FBgn0000221_brn	0.973041	0.690586	0.553783	0.860957	0.891026	0.549124	0.991599	0.973041	0.0273467	0.0246209	0.690586	0.811998	0.553783	0.947701	0.860957	1.08044	0.891026	0.115692	0.0488432	0.549124	-0.599073	0.946814
71	FBgn0000227_Bsg25A	NA	NA	NA	NA	NA	NA	1	NA	NA	NA	NA	NA	NA	NA	NA	NA	NA	NA	NA	NA	NA	NA
72	FBgn0000228_Bsg25D	0.345994	0.0258679	0.981248	0.040446	0.410793	0.0101143	0.0591718	0.345994	1.08797	0.107061	0.0258679	2.35184	0.981248	0.410496	0.040446	2.51019	0.410793	0.90833	0.0985373	0.0101143	2.5719	1.60806
73	FBgn0000229_bsk	0.515378	0.0112788	0.995207	0.0148582	0.722355	0.0149172	0.0657929	0.515378	0.673178	0.075235	0.0112788	2.74264	0.995207	0.327303	0.0148582	3.00892	0.722355	0.327712	0.0481579	0.0149172	2.43438	1.68043
74	FBgn0000233_btd	0.642216	0.347296	0.800786	0.541988	0.642695	0.39739	0.922679	0.642216	0.447423	0.172731	0.347296	1.18797	0.800786	0.70025	0.541988	1.30961	0.642695	0.446661	0.186552	0.39739	0.846292	1.26562
75	FBgn0000239_bur	0.74755	0.141546	0.943891	0.19241	0.662134	0.152701	0.599778	0.74755	0.292931	0.0479257	0.141546	1.59541	0.943891	0.508691	0.19241	1.78538	0.662134	0.416265	0.0652698	0.152701	1.43006	1.35081
76	FBgn0000241_bw	0.360539	0.188392	0.860239	0.319758	0.283951	0.396599	0.714189	0.360539	1.04474	0.0914779	0.188392	1.46884	0.860239	0.632737	0.319758	1.55454	0.283951	1.29654	0.098013	0.396599	0.84771	1.3249
77	FBgn0000244_by	0.126398	0.322066	0.595457	0.709808	0.179543	0.466676	0.555489	0.126398	2.17108	0.0821691	0.322066	1.2239	0.595457	0.905641	0.709808	1.17873	0.179543	1.78779	0.078983	0.466676	0.727898	1.10407
78	FBgn0000246_c(3)G	0.896932	0.000187539	0.999984	0.000174764	0.975318	0.00064793	0.00104812	0.896932	0.109051	0.0406632	0.000187539	5.07784	0.999984	0.156882	0.000174764	5.76891	0.975318	0.0250067	0.0244404	0.00064793	3.41071	2.66181
79	FBgn0000247_ca	0.393794	0.676064	0.416327	0.736429	0.442874	0.564655	0.950373	0.393794	0.952419	0.0877087	0.676064	0.826247	0.416327	1.09905	0.736429	1.16035	0.442874	0.830094	0.087943	0.564655	-0.57594	0.891533
80	FBgn0000250_cact	0.970464	0.000453098	0.999965	0.000418348	0.910935	0.00248721	0.00250746	0.970464	0.0300019	0.0125901	0.000453098	4.50509	0.999965	0.171688	0.000418348	5.14011	0.910935	0.0934863	0.0233167	0.00248721	3.02489	2.18967
81	FBgn0000251_cad	0.627564	0.00101042	0.999736	0.00113981	1	0.516263	0.00604725	0.627564	0.470995	1.09685	0.00101042	4.02113	0.999736	0.218955	0.00113981	4.47563	1	0	5.35e-16	0.516263	-0.649117	0.643432
82	FBgn0000253_Cam	0.426972	0.0093012	0.994829	0.0130273	0.463091	0.0466898	0.0545255	0.426972	0.868105	0.066237	0.0093012	2.83645	0.994829	0.331176	0.0130273	3.07703	0.463091	0.783779	0.0491926	0.0466898	1.9891	1.74928
83	FBgn0000256_capu	0.618845	0.21848	0.886891	0.326241	0.695192	0.243818	0.772155	0.618845	0.485297	0.0768822	0.21848	1.40247	0.886891	0.598738	0.326241	1.54537	0.695192	0.366658	0.0596269	0.243818	1.1655	1.24274
84	FBgn0000257_car	0.59827	0.977004	0.0558703	0.075683	0.51639	0.126818	0.291744	0.59827	0.519899	0.0716793	0.977004	0.426052	0.0558703	2.00464	0.075683	2.21332	0.51639	0.671156	0.0601068	0.126818	-1.52677	0.644044
85	FBgn0000259_CkIIbeta	0.578838	0.00139269	0.99956	0.00163723	0.710369	0.0118676	0.00832712	0.578838	0.553743	0.076777	0.00139269	3.83655	0.99956	0.233749	0.00163723	4.24943	0.710369	0.344705	0.0518547	0.0118676	2.51606	2.04069
86	FBgn0000261_Cat	0.143876	0.255171	0.686068	0.547456	0.141298	0.369202	0.599082	0.143876	2.02891	0.093076	0.255171	1.33205	0.686068	0.816435	0.547456	1.30484	0.141298	2.04871	0.101244	0.369202	0.89797	1.14724
87	FBgn0000273_Pka-C1	0.959647	0.02757	0.994662	0.0305004	0.966411	0.0307509	0.154429	0.959647	0.0412296	0.0262706	0.02757	2.32262	0.994662	0.332821	0.0305004	2.64743	0.966411	0.0341928	0.0223276	0.0307509	2.16028	1.47361
88	FBgn0000274_Pka-C2	0.301156	0.635581	0.415804	0.77554	1	0.602873	0.883512	0.301156	1.23425	1.23109	0.635581	0.86595	0.415804	1.09968	0.77554	1.13425	1	0	2.6e-16	0.602873	0.520274	1.40113
89	FBgn0000276_CecA1	0.421888	1	4.97e-10	5.67e-10	0.412045	0.0457772	2.98e-09	0.421888	0.88057	1.51669	1	0.0740372	4.97e-10	21.7537	5.67e-10	23.8438	0.412045	0.905158	0.321652	0.0457772	1.99744	6.61818
90	FBgn0000277_CecA2	0.481265	1	3.45e-10	3.69e-10	0.330898	0.0667283	2.07e-09	0.481265	0.743917	1.36361	1	0.0666081	3.45e-10	22.5866	3.69e-10	24.9165	0.330898	1.13488	0.343748	0.0667283	1.8335	6.13255
91	FBgn0000278_CecB	0.489781	1	3.32e-10	3.52e-10	0.253819	0.0684928	1.99e-09	0.489781	0.725778	1.37507	1	0.0656676	3.32e-10	22.6751	3.52e-10	25.0355	0.253819	1.4158	0.353822	0.0684928	1.82175	4.02341
92	FBgn0000279_CecC	0.544926	1	4.97e-10	5.03e-10	0.341248	0.0446889	2.98e-09	0.544926	0.615759	1.07613	1	0.0623466	4.97e-10	21.7515	5.03e-10	24.1389	0.341248	1.10248	0.305483	0.0446889	2.00757	3.74392
93	FBgn0000280_Cec-Psi1	NA	NA	NA	NA	NA	NA	1	NA	NA	NA	NA	NA	NA	NA	NA	NA	NA	NA	NA	NA	NA	NA
94	FBgn0000281_Cec2	NA	NA	NA	NA	NA	NA	1	NA	NA	NA	NA	NA	NA	NA	NA	NA	NA	NA	NA	NA	NA	NA
95	FBgn0000283_Cp190	0.877538	0.646918	0.583465	0.935629	0.922029	0.772578	0.994777	0.877538	0.131033	0.029133	0.646918	0.854816	0.583465	0.917635	0.935629	1.03632	0.922029	0.0813317	0.0183204	0.772578	-0.289004	0.946108
96	FBgn0000286_Cf2	0.875985	0.00197141	0.99974	0.00198899	0.613277	0.0170525	0.0117703	0.875985	0.132815	0.0355136	0.00197141	3.64212	0.99974	0.218541	0.00198899	4.13073	0.613277	0.49454	0.0577449	0.0170525	2.38557	1.98636
97	FBgn0000287_salr	0.929874	0.671852	0.566676	0.893194	0.929944	0.803003	0.99338	0.929874	0.0728293	0.0357472	0.671852	0.830375	0.566676	0.934569	0.893194	1.0611	0.929944	0.0727538	0.0396353	0.803003	0.249463	1.10975
98	FBgn0000289_cg	0.369535	0.0431375	0.970828	0.0673378	0.178009	0.147551	0.232467	0.369535	1.01892	0.0572359	0.0431375	2.11996	0.970828	0.445564	0.0673378	2.26794	0.178009	1.79709	0.0749484	0.147551	1.44824	1.5022
99	FBgn0000299_Col4a1	0.88364	0.0145565	0.997239	0.0159714	0.84331	0.0515561	0.0842214	0.88364	0.124062	0.0522234	0.0145565	2.62036	0.997239	0.301184	0.0159714	2.97178	0.84331	0.171098	0.0533096	0.0515561	1.94682	1.87828
100	FBgn0000303_ChAT	0.045266	0.625748	0.169782	0.481717	0.113258	0.471442	0.242654	0.045266	3.32908	0.126282	0.625748	0.875627	0.169782	1.51506	0.481717	1.36526	0.113258	2.29224	0.118625	0.471442	-0.720134	0.843379
101	FBgn0000307_chif	0.609962	0.773107	0.374818	0.597633	0.736311	0.627065	0.940291	0.609962	0.500085	0.0423515	0.773107	0.729345	0.374818	1.15105	0.597633	1.26285	0.736311	0.308293	0.0301559	0.627065	-0.485862	0.912385
102	FBgn0000308_chic	0.0961336	0.00315574	0.985902	0.00752465	0.25982	0.00880899	0.0187857	0.0961336	2.47434	0.0936306	0.00315574	3.3875	0.985902	0.39034	0.00752465	3.36866	0.25982	1.3909	0.0755017	0.00880899	2.61938	1.92381
103	FBgn0000316_cin	0.624654	0.362512	0.785765	0.572466	0.702292	0.616449	0.932883	0.624654	0.475745	0.0531136	0.362512	1.16729	0.785765	0.716168	0.572466	1.28351	0.702292	0.356327	0.0542755	0.616449	0.500889	1.18026
104	FBgn0000317_ck	0.264167	0.562384	0.469698	0.904901	0.30791	0.937047	0.841264	0.264167	1.37325	0.0708065	0.562384	0.938927	0.469698	1.03722	0.904901	1.05419	0.30791	1.21081	0.0803041	0.937047	-0.0789821	0.984031
105	FBgn0000318_cl	0.645958	0.0823358	0.966678	0.111754	0.648809	0.065504	0.334015	0.645958	0.441493	0.119004	0.0823358	1.83344	0.966678	0.457188	0.111754	2.03308	0.648809	0.436998	0.142107	0.065504	1.8418	1.44821
106	FBgn0000319_Chc	0.742669	0.258829	0.877175	0.375953	0.666628	0.33774	0.834229	0.742669	0.299572	0.0304596	0.258829	1.32553	0.877175	0.611511	0.375953	1.48033	0.666628	0.409371	0.0358106	0.33774	0.95864	1.24123
107	FBgn0000320_eya	0.00129656	0.112498	0.246801	0.741229	0.00340807	0.504519	0.0077542	0.00129656	7.79052	0.16099	0.112498	1.69638	0.246801	1.34727	0.741229	1.15709	0.00340807	6.50306	0.155665	0.504519	0.667397	1.06699
108	FBgn0000326_clt	0.864973	0.181243	0.932208	0.242599	0.863068	0.434788	0.698749	0.864973	0.145547	0.0465728	0.181243	1.48606	0.932208	0.530217	0.242599	1.68021	0.863068	0.147767	0.0436164	0.434788	0.781024	1.27095
109	FBgn0000330_cm	0.326846	0.0271315	0.979056	0.0433193	0.256611	0.0442862	0.152139	0.326846	1.14786	0.150671	0.0271315	2.32996	0.979056	0.418799	0.0433193	2.47717	0.256611	1.40414	0.177103	0.0442862	2.01137	1.37594
110	FBgn0000337_cn	0.89943	0.00719978	0.998856	0.00757893	0.932307	0.34326	0.0424285	0.89943	0.106256	0.213146	0.00719978	2.96304	0.998856	0.265658	0.00757893	3.36476	0.932307	0.0702074	0.116664	0.34326	0.947744	1.4099
111	FBgn0000339_cni	0.44573	0.013288	0.99301	0.0185595	0.67598	0.0420394	0.0771262	0.44573	0.823419	0.0750389	0.013288	2.66383	0.99301	0.347311	0.0185595	2.89519	0.67598	0.39518	0.0543198	0.0420394	2.03313	1.76044
112	FBgn0000346_comt	0.0796506	0.0348456	0.907944	0.0885333	0.173068	0.0726437	0.191685	0.0796506	2.68499	0.0859541	0.0348456	2.21606	0.907944	0.569117	0.0885333	2.14045	0.173068	1.82761	0.0732727	0.0726437	1.79506	1.47763
113	FBgn0000351_cort	0.441627	0.197024	0.8723	0.318209	0.453575	0.317437	0.73195	0.441627	0.833023	0.265865	0.197024	1.44884	0.8723	0.617745	0.318209	1.55676	0.453575	0.80531	0.286604	0.317437	0.999739	1.3777
114	FBgn0000352_cos	0.553645	0.717973	0.425611	0.704451	0.332944	0.828269	0.9119	0.553645	0.599436	0.0440051	0.717973	0.784987	0.425611	1.08793	0.704451	1.1825	0.332944	1.1284	0.0576519	0.828269	-0.216922	0.887052
115	FBgn0000355_Cp15	NA	NA	NA	NA	NA	NA	1	NA	NA	NA	NA	NA	NA	NA	NA	NA	NA	NA	NA	NA	NA	NA
116	FBgn0000356_Cp16	NA	NA	NA	NA	NA	NA	1	NA	NA	NA	NA	NA	NA	NA	NA	NA	NA	NA	NA	NA	NA	NA
117	FBgn0000357_Cp18	0.672046	0.126751	0.946055	0.175898	0.850951	0.0945306	0.448884	0.672046	0.401125	0.21004	0.126751	1.64398	0.946055	0.504424	0.175898	1.82611	0.850951	0.162009	0.119346	0.0945306	1.67197	1.25049
118	FBgn0000358_Cp19	0.280133	7.86e-05	0.999836	0.000117778	1	0.0143754	0.000471432	0.280133	1.3109	1.69635	7.86e-05	5.68828	0.999836	0.206296	0.000117778	6.06983	1	0	4.83e-16	0.0143754	-2.44774	6.23e-17
119	FBgn0000359_Cp36	0.698182	0.332318	0.821563	0.505841	1	0.0232373	0.131571	0.698182	0.362294	1.57162	0.332318	1.20903	0.821563	0.677604	0.505841	1.34228	1	0	1.89e-17	0.0232373	2.26951	1.95444
120	FBgn0000360_Cp38	0.821803	0.538896	0.677853	0.859192	1	0.525804	0.98863	0.821803	0.197153	0.879202	0.538896	0.963026	0.677853	0.824494	0.859192	1.08151	1	0	1.02e-16	0.525804	0.634424	1.16319
121	FBgn0000370_crc	0.628225	0.0249681	0.991357	0.03179	0.760377	0.140369	0.140763	0.628225	0.469918	0.0423907	0.0249681	2.36811	0.991357	0.359466	0.03179	2.62714	0.760377	0.275694	0.0313994	0.140369	1.47442	1.61849
122	FBgn0000376_crm	0.425729	0.258158	0.821748	0.429985	0.441727	0.247729	0.818764	0.425729	0.871137	0.146563	0.258158	1.32672	0.821748	0.677399	0.429985	1.41827	0.441727	0.832788	0.152481	0.247729	1.15588	1.18179
123	FBgn0000377_crn	0.974835	0.0644392	0.984568	0.0754125	0.990282	0.0404173	0.219282	0.974835	0.0255026	0.0325694	0.0644392	1.94145	0.984568	0.396543	0.0754125	2.21499	0.990282	0.00976813	0.0191266	0.0404173	2.04946	1.47178
124	FBgn0000382_csw	0.752258	7.97e-05	0.999989	7.85e-05	0.734321	0.00463789	0.000471022	0.752258	0.286569	0.0614282	7.97e-05	5.67782	0.999989	0.150411	7.85e-05	6.39043	0.734321	0.311038	0.0589574	0.00463789	2.83116	2.60999
125	FBgn0000384_cta	0.868844	0.742741	0.472766	0.726321	0.975804	0.744943	0.978521	0.868844	0.141052	0.0543584	0.742741	0.760271	0.472766	1.0338	0.726321	1.16727	0.975804	0.0245072	0.023356	0.744943	-0.325315	0.980908
126	FBgn0000392_cup	0.0892975	0.799861	0.109271	0.265383	0.058016	0.376686	0.301347	0.0892975	2.55673	0.189016	0.799861	0.70124	0.109271	1.70915	0.265383	1.63944	0.058016	3.04414	0.227108	0.376686	-0.884018	0.761151
127	FBgn0000394_cv	0.737936	0.497162	0.698443	0.796318	0.704326	0.511495	0.983835	0.737936	0.306056	0.0631985	0.497162	1.0071	0.698443	0.804272	0.796318	1.12079	0.704326	0.353386	0.0763739	0.511495	0.656512	1.1145
128	FBgn0000395_cv-2	0.628349	0.650531	0.522807	0.870843	0.506333	0.290558	0.872502	0.628349	0.469718	0.0543233	0.650531	0.851272	0.522807	0.979807	0.870843	1.07446	0.506333	0.691446	0.0680389	0.290558	-1.0569	0.824903
129	FBgn0000404_CycA	0.104086	0.881397	0.0626463	0.146234	0.192833	0.176684	0.321701	0.104086	2.38588	0.328579	0.881397	0.60602	0.0626463	1.95393	0.146234	1.91012	0.192833	1.71057	0.186236	0.176684	1.35104	1.2728
130	FBgn0000405_CycB	0.306194	0.999997	5.19e-07	7.13e-07	0.620644	0.390065	3.11e-06	0.306194	1.21672	1.06777	0.999997	0.132542	5.19e-07	10.3445	7.13e-07	11.1355	0.620644	0.482328	0.200994	0.390065	0.8595	1.29232
131	FBgn0000406_Cyt-b5-r	0.753041	0.329443	0.832032	0.492154	0.578568	0.257214	0.832049	0.753041	0.285515	0.0996254	0.329443	1.21316	0.832032	0.665857	0.492154	1.3552	0.578568	0.554223	0.121601	0.257214	1.133	1.19777
132	FBgn0000411_D	0.0552767	0.0375161	0.875634	0.106724	0.0496029	0.19899	0.205012	0.0552767	3.09942	0.140299	0.0375161	2.18271	0.875634	0.613493	0.106724	2.05423	0.0496029	3.22365	0.151502	0.19899	1.28443	1.49576
133	FBgn0000412_D1	0.342594	0.00961457	0.992738	0.0146028	0.124625	0.0516082	0.0563185	0.342594	1.09834	0.0518328	0.00961457	2.82023	0.992738	0.349452	0.0146028	3.01787	0.124625	2.18663	0.0714265	0.0516082	1.94639	1.76426
134	FBgn0000414_Dab	0.779173	0.487834	0.714562	0.77046	0.814345	0.762328	0.98195	0.779173	0.250975	0.0445677	0.487834	1.01722	0.714562	0.788365	0.77046	1.13759	0.814345	0.206355	0.0394432	0.762328	0.302426	1.08378
135	FBgn0000416_Sap-r	0.913258	0.0130919	0.997704	0.0141146	0.915509	0.0192632	0.0760246	0.913258	0.0909286	0.0263873	0.0130919	2.67094	0.997704	0.293181	0.0141146	3.03544	0.915509	0.0884565	0.0297717	0.0192632	2.3404	1.78257
136	FBgn0000422_Ddc	0.242513	0.0460787	0.95314	0.082539	0.21224	0.145007	0.246514	0.242513	1.46442	0.0716047	0.0460787	2.09045	0.95314	0.489701	0.082539	2.17296	0.21224	1.60728	0.0871503	0.145007	1.4574	1.37509
137	FBgn0000426_SmF	0.931742	0.435715	0.781107	0.649597	0.876575	0.526852	0.967716	0.931742	0.0708152	0.0583077	0.435715	1.07601	0.781107	0.72104	0.649597	1.22241	0.876575	0.132137	0.0711773	0.526852	0.632818	1.15876
138	FBgn0000427_dec-1	0.650642	0.189444	0.908883	0.275231	1	0.889791	0.716405	0.650642	0.43412	0.820983	0.189444	1.46636	0.908883	0.567721	0.275231	1.62288	1	0	0	0.889791	0.138568	1.07347
139	FBgn0000439_Dfd	0.611826	0.0602648	0.975519	0.0814429	0.354492	0.0935067	0.311295	0.611826	0.496964	0.0416585	0.0602648	1.97108	0.975519	0.431034	0.0814429	2.17918	0.354492	1.06249	0.0730861	0.0935067	1.67718	1.48511
140	FBgn0000442_Pkg21D	0.984659	0.137933	0.958347	0.172755	0.980676	0.0638096	0.326736	0.984659	0.0154657	0.0243621	0.137933	1.6068	0.958347	0.477993	0.172755	1.8343	0.980676	0.0195218	0.0240556	0.0638096	1.85351	1.40675
141	FBgn0000447_Dhod	0.925975	0.268226	0.890717	0.370324	0.833427	0.209924	0.756772	0.925975	0.0770462	0.0525357	0.268226	1.30916	0.890717	0.593569	0.370324	1.48727	0.833427	0.182984	0.0757802	0.209924	1.25377	1.2085
142	FBgn0000448_Hr3	0.866946	0.0174799	0.996445	0.0195033	0.892075	0.0718136	0.100402	0.866946	0.143254	0.0449218	0.0174799	2.53388	0.996445	0.312732	0.0195033	2.87007	0.892075	0.114509	0.0386997	0.0718136	1.8003	1.72493
143	FBgn0000449_dib	0.714839	0.994467	0.0198176	0.0238341	1	0.18652	0.113168	0.714839	0.338333	0.800284	0.994467	0.334695	0.0198176	2.47512	0.0238341	2.7694	1	0	9.94e-18	0.18652	1.32094	4.60116
144	FBgn0000451_ect	0.295584	0.606615	0.442881	0.832646	0.291868	0.798067	0.873909	0.295584	1.25401	0.260487	0.606615	0.894543	0.442881	1.06767	0.832646	1.09784	0.291868	1.2674	0.279102	0.798067	-0.25585	0.898587
145	FBgn0000454_Dip-B	0.98454	0.321025	0.865196	0.448413	0.989321	0.224511	0.782503	0.98454	0.0155861	0.0218308	0.321025	1.22543	0.865196	0.626646	0.448413	1.39875	0.989321	0.0107387	0.0235729	0.224511	1.21462	1.23754
146	FBgn0000455_Dip-C	0.901445	0.0863136	0.975318	0.106114	0.784678	0.0483587	0.257255	0.901445	0.104007	0.0506504	0.0863136	1.8127	0.975318	0.431695	0.106114	2.05687	0.784678	0.243855	0.0757005	0.0483587	1.9742	1.54464
147	FBgn0000459_disco	0.424224	0.0229383	0.986938	0.0333011	0.506572	0.0236241	0.129975	0.424224	0.874823	0.0897749	0.0229383	2.40722	0.986938	0.385237	0.0333011	2.60445	0.506572	0.69096	0.0897641	0.0236241	2.26319	1.66041
148	FBgn0000463_Dl	0.536855	0.0550981	0.9745	0.0772064	0.544325	0.314274	0.288262	0.536855	0.631113	0.0747233	0.0550981	2.01082	0.9745	0.434338	0.0772064	2.20403	0.544325	0.616894	0.0632219	0.314274	1.00629	1.25392
149	FBgn0000464_Lar	0.160866	0.325889	0.628257	0.683493	0.0984883	0.675377	0.463181	0.160866	1.90708	0.0645384	0.325889	1.21831	0.628257	0.873155	0.683493	1.19744	0.0984883	2.44737	0.0677261	0.675377	0.41878	1.1446
150	FBgn0000473_Cyp6a2	0.323209	0.328969	0.726863	0.594872	0.409782	0.409705	0.903899	0.323209	1.15965	0.268713	0.328969	1.21385	0.726863	0.776155	0.594872	1.26508	0.409782	0.910898	0.241261	0.409705	0.824412	1.1088
151	FBgn0000477_DNaseII	0.33654	0.00228193	0.998048	0.00336089	0.202549	0.106859	0.0136137	0.33654	1.11709	0.134312	0.00228193	3.56192	0.998048	0.286402	0.00336089	3.82032	0.202549	1.65756	0.150663	0.106859	1.61247	1.90381
152	FBgn0000479_dnc	0.58054	0.124133	0.939923	0.1794	0.265761	0.191149	0.548531	0.58054	0.550731	0.0667258	0.124133	1.65316	0.939923	0.516269	0.1794	1.81716	0.265761	1.36685	0.0936088	0.191149	1.30719	1.64504
153	FBgn0000482_dor	0.81431	0.253446	0.88848	0.358747	0.71507	0.391366	0.826872	0.81431	0.206398	0.0877681	0.253446	1.33515	0.88848	0.596602	0.358747	1.50187	0.71507	0.338004	0.0992731	0.391366	0.857142	1.21894
154	FBgn0000489_Pka-C3	0.568267	0.00561365	0.998039	0.00694874	0.800669	0.0259566	0.0332127	0.568267	0.572658	0.0681991	0.00561365	3.08832	0.998039	0.286585	0.00694874	3.41199	0.800669	0.22346	0.0423836	0.0259566	2.22686	1.82443
155	FBgn0000490_dpp	0.843574	0.181308	0.930671	0.244369	0.506711	0.398251	0.698891	0.843574	0.170782	0.0375413	0.181308	1.4859	0.930671	0.532888	0.244369	1.67691	0.506711	0.690677	0.0575273	0.398251	0.844749	1.32096
156	FBgn0000492_Dr	0.943259	0.965123	0.116832	0.145687	0.928666	0.363749	0.525473	0.943259	0.0584934	0.0436535	0.965123	0.461302	0.116832	1.67978	0.145687	1.91183	0.928666	0.0741334	0.042382	0.363749	-0.908245	0.790184
157	FBgn0000499_dsh	0.677329	0.217708	0.894816	0.317434	0.665576	0.0487663	0.259162	0.677329	0.393149	0.122462	0.217708	1.40407	0.894816	0.587934	0.317434	1.55787	0.665576	0.410982	0.128008	0.0487663	1.97063	1.25407
158	FBgn0000500_Dsk	0.71445	0.0198317	0.994458	0.0238565	0.589471	0.126681	0.113245	0.71445	0.338885	0.0476193	0.0198317	2.47479	0.994458	0.334779	0.0238565	2.76893	0.589471	0.53508	0.0527707	0.126681	1.52732	1.82778
159	FBgn0000504_dsx	0.96613	0.942193	0.173375	0.22394	0.966139	0.131306	0.570266	0.96613	0.0344842	0.0311785	0.942193	0.51197	0.173375	1.50578	0.22394	1.71653	0.966139	0.0344753	0.0372006	0.131306	-1.50897	0.721452
160	FBgn0000520_dwg	0.549173	0.0244127	0.989928	0.0325203	0.634861	0.00389343	0.0231344	0.549173	0.607774	0.219795	0.0244127	2.37847	0.989928	0.368666	0.0325203	2.61603	0.634861	0.459184	0.215419	0.00389343	2.88667	1.64943
161	FBgn0000524_dx	0.108353	0.230912	0.672714	0.528613	0.176415	0.581437	0.497474	0.108353	2.34128	0.10936	0.230912	1.37749	0.672714	0.829531	0.528613	1.32147	0.176415	1.80684	0.099688	0.581437	0.551287	1.14998
162	FBgn0000527_e	0.8432	0.170062	0.936259	0.227641	0.873447	0.156718	0.640387	0.8432	0.171229	0.0397397	0.170062	1.51433	0.936259	0.523014	0.227641	1.70909	0.873447	0.135735	0.0311223	0.156718	1.4162	1.25715
163	FBgn0000529_bsh	0.951246	0.927227	0.203132	0.268533	0.895372	0.0608554	0.313888	0.951246	0.0500405	0.0455847	0.927227	0.538753	0.203132	1.43518	0.268533	1.63408	0.895372	0.110801	0.0640341	0.0608554	-1.87454	0.618316
164	FBgn0000533_ea	0.589738	0.192562	0.899576	0.28765	0.591373	0.133302	0.576156	0.589738	0.534616	0.119876	0.192562	1.45907	0.899576	0.581254	0.28765	1.60279	0.591373	0.531778	0.116671	0.133302	1.50121	1.38448
165	FBgn0000535_eag	0.792462	0.242386	0.892749	0.343562	0.78405	0.327245	0.810901	0.792462	0.233873	0.0538194	0.242386	1.35549	0.892749	0.590789	0.343562	1.5217	0.78405	0.244665	0.0590906	0.327245	0.979679	1.19113
166	FBgn0000536_eas	0.135734	0.0218857	0.958122	0.0467135	0.203302	0.045818	0.124336	0.135734	2.09275	0.0904246	0.0218857	2.42897	0.958122	0.478516	0.0467135	2.44103	0.203302	1.65357	0.0794109	0.045818	1.99707	1.59409
167	FBgn0000541_E(bx)	0.59138	0.0178463	0.993548	0.0228265	0.770685	0.0889705	0.102412	0.59138	0.531766	0.0619134	0.0178463	2.52414	0.993548	0.342907	0.0228265	2.79097	0.770685	0.26206	0.0441756	0.0889705	1.70085	1.74927
168	FBgn0000542_ec	0.55879	0.315795	0.80806	0.502924	0.496088	0.375808	0.897407	0.55879	0.58993	0.0931533	0.315795	1.23318	0.80806	0.692413	0.502924	1.34501	0.496088	0.712555	0.114729	0.375808	0.885647	1.20018
169	FBgn0000543_ecd	0.774927	0.239878	0.892392	0.341531	0.655122	0.29718	0.807114	0.774927	0.256504	0.110423	0.239878	1.36021	0.892392	0.591278	0.341531	1.52441	0.655122	0.427121	0.142337	0.29718	1.0425	1.204
170	FBgn0000546_EcR	0.983699	0.108556	0.969733	0.13272	0.985776	0.21927	0.49816	0.983699	0.0164413	0.008314	0.108556	1.71204	0.969733	0.44873	0.13272	1.95435	0.985776	0.0143312	0.00673469	0.21927	1.22847	1.43143
171	FBgn0000547_ed	0.46364	0.135536	0.919451	0.210207	0.479428	0.0797411	0.39262	0.46364	0.782552	0.0442638	0.135536	1.61452	0.919451	0.55146	0.210207	1.74524	0.479428	0.747874	0.0442791	0.0797411	1.75219	1.33243
172	FBgn0000551_Edg78E	0.187384	0.868341	0.113598	0.225194	0.358885	0.878228	0.514953	0.187384	1.74154	0.571519	0.868341	0.622731	0.113598	1.69211	0.225194	1.714	0.358885	1.04957	0.397541	0.878228	-0.153216	0.958444
173	FBgn0000552_Edg84A	0.355185	0.653034	0.424272	0.767353	0.581277	0.805181	0.92812	0.355185	1.06044	0.859882	0.653034	0.848818	0.424272	1.08952	0.767353	1.13963	0.581277	0.54943	0.413964	0.805181	-0.246648	0.917085
174	FBgn0000557_eEF1alpha2	0.264169	0.0460847	0.956688	0.0803336	0.177459	0.173572	0.246542	0.264169	1.37324	0.0562987	0.0460847	2.09039	0.956688	0.481816	0.0803336	2.18555	0.177459	1.80044	0.0682252	0.173572	1.36082	1.45209
175	FBgn0000559_eEF2	0.878576	0.183966	0.931791	0.245605	0.921257	0.096661	0.456619	0.878576	0.129844	0.0530169	0.183966	1.47943	0.931791	0.530946	0.245605	1.67462	0.921257	0.0821728	0.0416143	0.096661	1.66126	1.19537
176	FBgn0000560_eg	0.78076	0.855127	0.300751	0.43991	0.749534	0.459027	0.883106	0.78076	0.248917	0.17122	0.855127	0.638924	0.300751	1.2561	0.43991	1.40766	0.749534	0.290245	0.216222	0.459027	-0.740451	0.83078
177	FBgn0000562_egl	0.372605	0.103654	0.928048	0.168343	0.415308	0.168278	0.481373	0.372605	1.01025	0.060825	0.103654	1.73232	0.928048	0.537369	0.168343	1.84606	0.415308	0.896938	0.0572635	0.168278	1.37776	1.48332
178	FBgn0000564_Eh	0.400839	0.410277	0.684227	0.72211	0.255723	0.786005	0.830016	0.400839	0.933911	0.324993	0.410277	1.10639	0.684227	0.818241	0.72211	1.17017	0.255723	1.40784	0.408894	0.786005	0.271501	1.11734
179	FBgn0000565_Eip71CD	0.416973	0.0269778	0.984236	0.0396615	0.517436	0.116809	0.151335	0.416973	0.892771	0.134927	0.0269778	2.33256	0.984236	0.398026	0.0396615	2.51964	0.517436	0.669069	0.128332	0.116809	1.56831	1.59767
180	FBgn0000566_Eip55E	0.919135	0.0948345	0.972716	0.116865	0.948348	0.0262104	0.147311	0.919135	0.0844873	0.0469778	0.0948345	1.77135	0.972716	0.439916	0.116865	2.01256	0.948348	0.0530988	0.0420003	0.0262104	2.22308	1.44298
181	FBgn0000567_Eip74EF	0.905192	0.0399003	0.990776	0.0461509	0.815981	0.107743	0.216754	0.905192	0.0998395	0.037073	0.0399003	2.15498	0.990776	0.36333	0.0461509	2.44682	0.815981	0.204328	0.0516129	0.107743	1.60842	1.53558
182	FBgn0000568_Eip75B	0.941	0.00611359	0.999139	0.00627991	0.642223	0.0196628	0.0361255	0.941	0.0608977	0.0260293	0.00611359	3.04511	0.999139	0.255539	0.00627991	3.46747	0.642223	0.447412	0.0561046	0.0196628	2.33272	2.04087
183	FBgn0000575_emc	0.883829	0.149039	0.948697	0.194137	0.981742	0.101694	0.474533	0.883829	0.123847	0.0455876	0.149039	1.57268	0.948697	0.499078	0.194137	1.78132	0.981742	0.0184346	0.0178496	0.101694	1.63669	1.45056
184	FBgn0000576_ems	0.581419	0.172717	0.910993	0.25645	0.704918	0.394852	0.679428	0.581419	0.54918	0.12637	0.172717	1.50746	0.910993	0.564556	0.25645	1.655	0.704918	0.352533	0.0803598	0.394852	0.850852	1.15442
185	FBgn0000577_en	0.493377	0.605411	0.529474	0.92314	0.743011	0.838395	0.983091	0.493377	0.718217	0.169176	0.605411	0.895737	0.529474	0.972824	0.92314	1.04353	0.743011	0.299106	0.109097	0.838395	0.203947	1.01398
186	FBgn0000578_ena	0.409645	0.0428379	0.974013	0.0646488	0.623872	0.0517199	0.231023	0.409645	0.911247	0.071993	0.0428379	2.12309	0.974013	0.435887	0.0646488	2.28707	0.623872	0.477024	0.0552412	0.0517199	1.94546	1.53851
187	FBgn0000579_Eno	0.904451	0.0026112	0.999663	0.00262872	0.717431	0.00611765	0.0155653	0.904451	0.100662	0.0594022	0.0026112	3.48885	0.999663	0.225866	0.00262872	3.96402	0.717431	0.334656	0.0986599	0.00611765	2.74141	2.19861
188	FBgn0000581_E(Pc)	0.583519	0.363384	0.776444	0.582732	0.731171	0.647037	0.933432	0.583519	0.545484	0.0467794	0.363384	1.16612	0.776444	0.725889	0.582732	1.27499	0.731171	0.315399	0.0364368	0.647037	0.457883	1.15724
189	FBgn0000588_esc	0.685315	0.0223404	0.993248	0.0274397	0.811949	0.0462461	0.126775	0.685315	0.381217	0.0894832	0.0223404	2.41945	0.993248	0.345398	0.0274397	2.69948	0.811949	0.209331	0.0666355	0.0462461	1.99314	1.65385
190	FBgn0000591_E(spl)m8-HLH	NA	NA	NA	NA	NA	NA	1	NA	NA	NA	NA	NA	NA	NA	NA	NA	NA	NA	NA	NA	NA	NA
191	FBgn0000592_Est-6	0.00791841	0.0813829	0.538775	0.37931	0.0102558	0.567998	0.0465798	0.00791841	5.42627	0.182835	0.0813829	1.83856	0.538775	0.963152	0.37931	1.47624	0.0102558	5.10428	0.137896	0.567998	0.571002	1.13404
192	FBgn0000594_Est-P	0.0298637	0.764236	0.0597369	0.200644	0.0202876	0.371006	0.115716	0.0298637	3.81407	0.32404	0.764236	0.738469	0.0597369	1.97497	0.200644	1.76636	0.0202876	4.27341	0.362619	0.371006	-0.894591	0.798497
193	FBgn0000606_eve	0.501293	0.00118355	0.999498	0.00146681	1	0.119416	0.00708031	0.501293	0.701775	1.83763	0.00118355	3.92954	0.999498	0.237847	0.00146681	4.31734	1	0	2.97e-16	0.119416	1.55723	5.35861
194	FBgn0000611_exd	0.950414	0.999984	0.000213898	0.000195182	0.992333	0.0215988	0.00117052	0.950414	0.0509179	0.025922	0.999984	0.156308	0.000213898	4.9896	0.000195182	5.68656	0.992333	0.00769782	0.0154536	0.0215988	-2.29735	0.35841
195	FBgn0000615_exu	0.217763	0.0326859	0.96215	0.0600611	0.287163	0.0121692	0.0708293	0.217763	1.57969	0.208507	0.0326859	2.24505	0.96215	0.468857	0.0600611	2.32171	0.287163	1.28462	0.224656	0.0121692	2.5072	1.67065
196	FBgn0000617_e(y)1	0.843476	0.697978	0.520747	0.820357	0.677967	0.918264	0.987883	0.843476	0.1709	0.0493752	0.697978	0.80473	0.520747	0.981974	0.820357	1.10552	0.677967	0.392191	0.0750271	0.918264	0.10262	1.04918
197	FBgn0000618_e(y)2	0.772524	0.0404602	0.988431	0.0493899	0.565286	0.223572	0.219491	0.772524	0.259648	0.0784811	0.0404602	2.14871	0.988431	0.377347	0.0493899	2.41444	0.565286	0.578058	0.105679	0.223572	1.21708	1.27067
198	FBgn0000625_eyg	0.548627	0.914127	0.161202	0.241749	0.400248	0.124074	0.548348	0.548627	0.608797	0.0810621	0.914127	0.559783	0.161202	1.53803	0.241749	1.6818	0.400248	0.93545	0.104725	0.124074	-1.5379	0.781282
199	FBgn0000629_E(z)	0.800217	0.178148	0.929071	0.243147	0.743637	0.184098	0.691851	0.800217	0.224031	0.0506517	0.178148	1.49372	0.929071	0.535632	0.243147	1.67919	0.743637	0.298252	0.0664243	0.184098	1.32824	1.31111
200	FBgn0000633_CG17716	0.586651	0.200569	0.894035	0.301175	0.709185	0.261792	0.738972	0.586651	0.539995	0.0884695	0.200569	1.44087	0.894035	0.589015	0.301175	1.58186	0.709185	0.3464	0.061137	0.261792	1.12217	1.25789
201	FBgn0000635_Fas2	0.0828975	0.0172523	0.946156	0.0434198	0.0811983	0.030214	0.0991508	0.0828975	2.64009	0.0641409	0.0172523	2.54004	0.946156	0.504224	0.0434198	2.47606	0.0811983	2.66335	0.0651342	0.030214	2.16727	1.53414
202	FBgn0000636_Fas3	0.0979	0.044653	0.904645	0.106246	0.105703	0.177219	0.239732	0.0979	2.45404	0.0748207	0.044653	2.1045	0.904645	0.573966	0.106246	2.05629	0.105703	2.36876	0.0745899	0.177219	1.34937	1.41616
203	FBgn0000639_Fbp1	0.126005	0.162026	0.772541	0.358561	0.190342	0.915722	0.554288	0.126005	2.17451	1.02918	0.162026	1.53577	0.772541	0.729929	0.358561	1.5021	0.190342	1.72461	0.662113	0.915722	-0.105824	0.978091
204	FBgn0000640_Fbp2	0.456043	0.315635	0.783626	0.526671	1	0.809409	0.897263	0.456043	0.799681	0.826175	0.315635	1.23342	0.783626	0.718409	0.526671	1.32321	1	1.06e-14	7.1e-16	0.809409	0.241189	1.20059
205	FBgn0000644_Fcp3C	0.781446	0.769252	0.42112	0.647729	0.615386	0.887881	0.96237	0.781446	0.248029	0.104399	0.769252	0.73332	0.42112	1.09328	0.647729	1.22381	0.615386	0.491029	0.138687	0.887881	0.140985	1.03867
206	FBgn0000658_fj	0.0149317	0.115949	0.554817	0.443113	0.0259054	0.212682	0.0863115	0.0149317	4.6435	0.320001	0.115949	1.68311	0.554817	0.946644	0.443113	1.40429	0.0259054	3.98204	0.316968	0.212682	1.24623	1.192
207	FBgn0000659_fkh	0.786997	0.0585832	0.98226	0.0729014	0.691439	0.176574	0.303868	0.786997	0.240871	0.0549739	0.0585832	1.98361	0.98226	0.406434	0.0729014	2.23079	0.691439	0.372164	0.0623774	0.176574	1.35138	1.33891
208	FBgn0000662_fl(2)d	0.783894	0.0900989	0.969642	0.116052	0.882728	0.0453792	0.243193	0.783894	0.244865	0.0303802	0.0900989	1.79384	0.969642	0.448989	0.116052	2.01576	0.882728	0.125101	0.0223341	0.0453792	2.00112	1.43975
209	FBgn0000667_Actn	0.751869	0.0936468	0.966719	0.122554	0.773245	0.0429772	0.231695	0.751869	0.287094	0.0657905	0.0936468	1.77688	0.966719	0.457078	0.122554	1.99079	0.773245	0.258703	0.0777545	0.0429772	2.02393	1.43576
210	FBgn0000709_fliI	0.853981	0.145987	0.948424	0.191624	0.755263	0.0576935	0.299911	0.853981	0.158428	0.0507842	0.145987	1.5818	0.948424	0.499638	0.191624	1.78724	0.755263	0.282529	0.0666687	0.0576935	1.89802	1.30701
211	FBgn0000711_flw	0.501596	0.180977	0.894483	0.28074	0.362524	0.236919	0.69816	0.501596	0.701151	0.0478221	0.180977	1.48671	0.894483	0.588395	0.28074	1.61386	0.362524	1.03899	0.0539664	0.236919	1.18272	1.4024
212	FBgn0000715_FMRFa	0.767386	0.215338	0.905925	0.303517	0.618763	0.347036	0.766603	0.767386	0.266403	0.0841041	0.215338	1.40899	0.905925	0.572095	0.303517	1.57833	0.618763	0.485432	0.100322	0.347036	0.940353	1.20514
213	FBgn0000719_fog	0.146839	0.00628252	0.985567	0.0128711	0.16363	0.0103075	0.037108	0.146839	2.00661	0.0748573	0.00628252	3.03136	0.985567	0.391936	0.0128711	3.08331	0.16363	1.88853	0.0863147	0.0103075	2.56534	1.6908
214	FBgn0000721_for	0.984158	0.00236774	0.999752	0.00229743	0.948557	0.0050634	0.0137056	0.984158	0.0159744	0.0111242	0.00236774	3.54183	0.999752	0.217177	0.00229743	4.04406	0.948557	0.0528787	0.0225667	0.0050634	2.80297	2.03234
215	FBgn0000723_FER	0.233501	0.0516528	0.946099	0.0939491	0.397721	0.0876858	0.272548	0.233501	1.5049	0.0928238	0.0516528	2.03952	0.946099	0.504337	0.0939491	2.11299	0.397721	0.94206	0.0862255	0.0876858	1.70773	1.40754
216	FBgn0000808_gd	0.424136	0.154712	0.899796	0.248206	0.736566	0.533436	0.635223	0.424136	0.87504	0.685792	0.154712	1.55619	0.899796	0.580942	0.248206	1.66984	0.736566	0.307941	0.396045	0.533436	0.622769	1.53288
217	FBgn0000810_fs(1)K10	0.922695	0.259326	0.895453	0.356693	0.826116	0.536603	0.834894	0.922695	0.0806074	0.0205006	0.259326	1.32465	0.895453	0.587049	0.356693	1.5045	0.826116	0.191871	0.0285492	0.536603	0.617958	1.16395
218	FBgn0000826_png	0.0918867	0.309342	0.56011	0.72804	1	0.751762	0.439159	0.0918867	2.52477	1.48649	0.309342	1.2429	0.56011	0.941241	0.72804	1.16609	1	0	3.89e-16	0.751762	0.316317	1.27255
219	FBgn0000927_fs(1)Ya	NA	NA	NA	NA	NA	NA	1	NA	NA	NA	NA	NA	NA	NA	NA	NA	NA	NA	NA	NA	NA	NA
220	FBgn0000928_fs(1)Yb	0.322952	0.400989	0.660328	0.735691	0.657564	0.795471	0.90368	0.322952	1.16049	0.597352	0.400989	1.1178	0.660328	0.841668	0.735691	1.16086	0.657564	0.423327	0.300938	0.795471	0.259212	1.04602
221	FBgn0000964_tj	0.717711	0.746939	0.434745	0.684282	0.78799	0.718881	0.967381	0.717711	0.334259	0.133719	0.746939	0.756043	0.434745	1.07715	0.684282	1.19687	0.78799	0.239595	0.113774	0.718881	-0.359954	0.866608
222	FBgn0000996_dup	0.518413	0.379556	0.747691	0.627853	0.557331	0.555567	0.942955	0.518413	0.667124	0.0939334	0.379556	1.14491	0.747691	0.755284	0.627853	1.23899	0.557331	0.592615	0.0861898	0.555567	0.589438	1.05291
223	FBgn0001075_ft	0.840574	0.0560512	0.984488	0.0680635	0.700985	0.0434517	0.233978	0.840574	0.174374	0.0428064	0.0560512	2.00321	0.984488	0.396902	0.0680635	2.26292	0.700985	0.358221	0.0631026	0.0434517	2.01934	1.58434
224	FBgn0001077_ftz	0.826624	0.94137	0.157371	0.210099	1	0.977861	0.642054	0.826624	0.19125	0.459674	0.94137	0.513539	0.157371	1.54866	0.210099	1.74547	1	0	9.98e-17	0.977861	0.0277507	1.03708
225	FBgn0001078_ftz-f1	0.363356	0.384372	0.69327	0.686129	0.231068	0.692554	0.793305	0.363356	1.03659	0.0668405	0.384372	1.13872	0.69327	0.80936	0.686129	1.19554	0.231068	1.51611	0.0783686	0.692554	0.395392	1.06507
226	FBgn0001079_fu	0.796464	0.00182106	0.999706	0.00190239	0.831077	0.00309451	0.0108768	0.796464	0.228783	0.0656767	0.00182106	3.68602	0.999706	0.222003	0.00190239	4.15771	0.831077	0.185831	0.0616195	0.00309451	2.95819	1.93241
227	FBgn0001083_fw	0.170832	0.43269	0.529085	0.899224	0.176509	0.921892	0.67502	0.170832	1.84173	0.119202	0.43269	1.07956	0.529085	0.97323	0.899224	1.05753	0.176509	1.80626	0.112616	0.921892	-0.0980504	0.972378
228	FBgn0001084_fy	0.602231	0.284706	0.839339	0.440293	0.821431	0.301242	0.86606	0.602231	0.513142	0.0901837	0.284706	1.28162	0.839339	0.657499	0.440293	1.40726	0.821431	0.19761	0.0564056	0.301242	1.03377	1.22653
229	FBgn0001085_fz	0.563679	0.33697	0.792817	0.539595	0.567498	0.747184	0.915043	0.563679	0.580982	0.0957832	0.33697	1.20241	0.792817	0.708736	0.539595	1.31172	0.567498	0.574048	0.099721	0.747184	0.322355	1.06558
230	FBgn0001086_fzy	0.18112	0.896137	0.084996	0.169056	1	0.556308	0.413135	0.18112	1.77832	1.15458	0.896137	0.586095	0.084996	1.81946	0.169056	1.84414	1	9.63e-15	2.7e-14	0.556308	0.588334	1.21452
231	FBgn0001087_g	0.00549074	0.00486829	0.832831	0.0321965	0.0179864	0.0582555	0.0288565	0.00549074	5.88873	0.0916832	0.00486829	3.16109	0.832831	0.664949	0.0321965	2.62092	0.0179864	4.41814	0.0831488	0.0582555	1.89377	1.64859
232	FBgn0001089_Gal	0.465449	0.026678	0.986348	0.0377636	0.446201	0.0157743	0.0909911	0.465449	0.778516	0.113864	0.026678	2.33769	0.986348	0.388177	0.0377636	2.54334	0.446201	0.822323	0.113507	0.0157743	2.4141	1.63536
233	FBgn0001090_bnb	0.00351452	0.0130329	0.702369	0.0929843	0.00264718	0.178138	0.0157783	0.00351452	6.46303	0.125754	0.0130329	2.6731	0.702369	0.800405	0.0929843	2.11776	0.00264718	6.83407	0.118364	0.178138	1.34651	1.41347
234	FBgn0001091_Gapdh1	0.65576	0.000573176	0.999869	0.000625575	0.326182	0.00644128	0.00343413	0.65576	0.426129	0.0884109	0.000573176	4.35977	0.999869	0.200714	0.000625575	4.86632	0.326182	1.15	0.139947	0.00644128	2.72443	2.06597
235	FBgn0001092_Gapdh2	0.259278	0.0325298	0.968223	0.0564365	0.262461	0.0381901	0.179978	0.259278	1.39313	0.0986506	0.0325298	2.24722	0.968223	0.452976	0.0564365	2.35111	0.262461	1.38014	0.114657	0.0381901	2.07281	1.50342
236	FBgn0001098_Gdh	0.409493	0.001847	0.998859	0.00250754	0.327529	0.00229363	0.011031	0.409493	0.911632	0.0821701	0.001847	3.67817	0.998859	0.265586	0.00250754	3.99196	0.327529	1.14566	0.0958852	0.00229363	3.04932	2.30002
237	FBgn0001099_gdl	0.933309	0.0231003	0.995537	0.0255206	0.915126	0.130874	0.13084	0.933309	0.0691297	0.0297682	0.0231003	2.40397	0.995537	0.323724	0.0255206	2.73539	0.915126	0.0888766	0.0299124	0.130874	1.51066	1.38783
238	FBgn0001104_Galphai	0.149652	0.426902	0.513765	0.908535	0.110469	0.928913	0.504589	0.149652	1.98587	0.0867409	0.426902	1.08639	0.513765	0.989349	0.908535	1.05205	0.110469	2.31984	0.100809	0.928913	-0.0892123	0.964499
239	FBgn0001105_Gbeta13F	0.919576	0.413289	0.796021	0.611908	0.61326	0.899228	0.959211	0.919576	0.0840066	0.0145532	0.413289	1.10272	0.796021	0.705335	0.611908	1.25146	0.61326	0.494569	0.0280432	0.899228	0.126637	1.04106
240	FBgn0001108_DCTN1-p150	0.818335	0.715375	0.495348	0.777105	0.796591	0.846236	0.983482	0.818335	0.201421	0.0381247	0.715375	0.787561	0.495348	1.00906	0.777105	1.13323	0.796591	0.228621	0.0418649	0.846236	-0.193923	0.938671
241	FBgn0001112_Gld	0.996161	0.514738	0.727792	0.783401	0.973529	0.740631	0.986943	0.996161	0.00384665	0.00816232	0.514738	0.988319	0.727792	0.77523	0.783401	1.12913	0.973529	0.0268439	0.0219242	0.740631	0.331018	1.01163
242	FBgn0001114_Glt	0.622865	0.00920913	0.997123	0.01123	0.334366	0.0223417	0.0539982	0.622865	0.478676	0.100917	0.00920913	2.84132	0.997123	0.303018	0.01123	3.15472	0.334366	1.12391	0.152979	0.0223417	2.28451	1.8629
243	FBgn0001120_gnu	0.493907	0.956832	0.0817251	0.120358	0.567913	0.398042	0.400435	0.493907	0.717109	0.319418	0.956832	0.481488	0.0817251	1.83671	0.120358	1.99907	0.567913	0.573297	0.254605	0.398042	-0.845124	0.782307
244	FBgn0001122_Galphao	0.306697	0.00271073	0.997349	0.00415405	0.381101	0.0242425	0.0161546	0.306697	1.21498	0.0950722	0.00271073	3.46872	0.997349	0.299384	0.00415405	3.69872	0.381101	0.98666	0.0846494	0.0242425	2.25326	1.85821
245	FBgn0001123_Galphas	0.740622	0.000271537	0.999957	0.000276633	0.883949	0.0031213	0.00162812	0.740622	0.302372	0.0636616	0.000271537	4.83211	0.999957	0.175655	0.000276633	5.43195	0.883949	0.12371	0.0417415	0.0031213	2.95553	2.3359
246	FBgn0001124_Got1	0.137287	0.0375967	0.935813	0.0803884	0.100335	0.105392	0.205411	0.137287	2.08026	0.150607	0.0375967	2.18175	0.935813	0.52382	0.0803884	2.18523	0.100335	2.42668	0.159695	0.105392	1.61926	1.5471
247	FBgn0001125_Got2	0.0722745	0.2331	0.611285	0.584136	0.161613	0.978319	0.362446	0.0722745	2.79455	0.33889	0.2331	1.37322	0.611285	0.889914	0.584136	1.27384	0.161613	1.90203	0.241618	0.978319	0.0271769	1.0159
248	FBgn0001128_Gpdh	0.0341534	0.152711	0.610625	0.466535	0.0446097	0.4113	0.1882	0.0341534	3.65653	0.161666	0.152711	1.56194	0.610625	0.890567	0.466535	1.38026	0.0446097	3.34595	0.161416	0.4113	0.821608	1.1584
249	FBgn0001133_grau	0.860238	0.219146	0.912191	0.300353	0.876041	0.0773086	0.382924	0.860238	0.151074	0.0827277	0.219146	1.4011	0.912191	0.562743	0.300353	1.58311	0.876041	0.132751	0.0827147	0.0773086	1.76652	1.21001
250	FBgn0001134_Grd	0.582771	0.192795	0.898503	0.288941	0.589091	0.152001	0.628148	0.582771	0.546799	0.0670357	0.192795	1.45854	0.898503	0.582773	0.288941	1.60075	0.589091	0.53574	0.0722278	0.152001	1.4325	1.21967
251	FBgn0001137_grk	0.120861	0.000116712	0.998854	0.000249982	0.1717	0.00267532	0.00070007	0.120861	2.22044	0.146078	0.000116712	5.40479	0.998854	0.265726	0.000249982	5.50509	0.1717	1.83622	0.134282	0.00267532	3.00277	2.18087
252	FBgn0001138_grn	0.222798	0.0335073	0.96213	0.0611493	0.340943	0.0543291	0.184937	0.222798	1.55516	0.209508	0.0335073	2.23379	0.96213	0.468908	0.0611493	2.31325	0.340943	1.10342	0.188647	0.0543291	1.9242	1.65065
253	FBgn0001139_gro	0.828701	0.012235	0.997507	0.0136171	0.574532	0.0441679	0.0712007	0.828701	0.188719	0.0403056	0.012235	2.70341	0.997507	0.296702	0.0136171	3.05403	0.574532	0.561403	0.0635079	0.0441679	2.01249	2.26452
254	FBgn0001142_Gs1	0.569919	0.748408	0.394239	0.642097	0.613439	0.647345	0.950591	0.569919	0.569678	0.0570612	0.748408	0.75456	0.394239	1.12622	0.642097	1.22808	0.613439	0.49427	0.0576216	0.647345	-0.457453	0.849922
255	FBgn0001145_Gs2	0.0178188	0.00354651	0.929854	0.0156942	0.00941268	0.0258624	0.0210913	0.0178188	4.42943	0.0856285	0.00354651	3.32577	0.929854	0.534293	0.0156942	2.98077	0.00941268	5.21064	0.0937203	0.0258624	2.22827	1.66649
256	FBgn0001147_gsb-n	0.252871	0.438369	0.586197	0.848115	0.217195	0.908902	0.769898	0.252871	1.41979	0.547325	0.438369	1.07291	0.586197	0.914896	0.848115	1.08828	0.217195	1.58249	0.540674	0.908902	-0.114424	0.971444
257	FBgn0001148_gsb	0.0987983	0.972599	0.00841534	0.0199272	1	0.609814	0.0494416	0.0987983	2.44387	1.25034	0.972599	0.440274	0.00841534	2.88565	0.0199272	2.85921	1	0	0	0.609814	-0.510338	0.642859
258	FBgn0001149_GstD1	0.997914	0.244126	0.909751	0.326389	0.975434	0.267843	0.813492	0.997914	0.00208861	0.00668067	0.244126	1.35223	0.909751	0.566424	0.326389	1.54516	0.975434	0.0248875	0.0291987	0.267843	1.10804	1.28314
259	FBgn0001150_gt	0.0645244	0.427293	0.382848	0.950293	0.025092	0.906466	0.141418	0.0645244	2.92306	0.178287	0.427293	1.08593	0.382848	1.14067	0.950293	1.02792	0.025092	4.01988	0.203477	0.906466	-0.117497	0.995288
260	FBgn0001168_h	0.0215697	0.262871	0.39578	0.833831	0.112093	0.961508	0.122637	0.0215697	4.20006	0.220266	0.262871	1.31843	0.39578	1.12429	0.833831	1.0971	0.112093	2.30368	0.166922	0.961508	0.0482608	1.04872
261	FBgn0001169_H	0.440792	0.0304401	0.983257	0.0441493	0.492065	0.078308	0.169293	0.440792	0.834988	0.0766013	0.0304401	2.27741	0.983257	0.40228	0.0441493	2.46806	0.492065	0.72097	0.0637948	0.078308	1.76059	1.54451
262	FBgn0001170_H2.0	0.198358	0.191642	0.794144	0.379149	0.0809938	0.217505	0.397564	0.198358	1.68009	0.532757	0.191642	1.46121	0.794144	0.70733	0.379149	1.47644	0.0809938	2.66619	0.676936	0.217505	1.23319	1.1637
263	FBgn0001174_halo	0.829894	0.0025134	0.999611	0.00261305	0.563968	0.046127	0.014986	0.829894	0.187268	0.214156	0.0025134	3.50947	0.999611	0.230081	0.00261305	3.96755	0.563968	0.580454	0.314464	0.046127	1.99423	2.03629
264	FBgn0001179_hay	0.958917	0.11454	0.966605	0.141855	0.648315	0.278428	0.518038	0.958917	0.0419913	0.015314	0.11454	1.68848	0.966605	0.457383	0.141855	1.92398	0.648315	0.437776	0.0500241	0.278428	1.08386	1.32947
265	FBgn0001180_hb	0.0706799	0.693614	0.165725	0.423227	0.0504097	0.442195	0.266808	0.0706799	2.81978	0.205591	0.693614	0.809022	0.165725	1.52578	0.423227	1.42562	0.0504097	3.2051	0.270127	0.442195	-0.768491	0.822871
266	FBgn0001185_her	0.853005	0.953246	0.135282	0.176277	0.913603	0.18879	0.581932	0.853005	0.15958	0.0277875	0.953246	0.489469	0.135282	1.61534	0.176277	1.82514	0.913603	0.0905495	0.0313511	0.18879	-1.31417	0.727251
267	FBgn0001186_Hex-A	0.402361	0.0179816	0.989116	0.0263364	0.376841	0.151824	0.103154	0.402361	0.929955	0.0676198	0.0179816	2.52059	0.989116	0.373479	0.0263364	2.71978	0.376841	0.998419	0.0618008	0.151824	1.43312	1.76545
268	FBgn0001187_Hex-C	0.693476	0.0402055	0.986829	0.0508542	0.726066	0.0203425	0.116013	0.693476	0.369172	0.114292	0.0402055	2.15155	0.986829	0.385787	0.0508542	2.40053	0.726066	0.322509	0.101723	0.0203425	2.31997	1.64647
269	FBgn0001189_hfw	0.869612	0.530197	0.694307	0.833572	0.888383	0.882319	0.989248	0.869612	0.140163	0.0332497	0.530197	0.972069	0.694307	0.808341	0.833572	1.09726	0.888383	0.118678	0.0310008	0.882319	-0.14803	0.951612
270	FBgn0001197_His2Av	0.365124	0.0262326	0.982116	0.0402964	0.437614	0.085997	0.147427	0.365124	1.0315	0.0649833	0.0262326	2.34541	0.982116	0.407023	0.0402964	2.51198	0.437614	0.842506	0.0605787	0.085997	1.7169	1.69486
271	FBgn0001202_hook	0.655684	0.87431	0.245714	0.366044	0.651968	0.262485	0.815832	0.655684	0.426246	0.0452063	0.87431	0.615188	0.245714	1.34928	0.366044	1.49262	0.651968	0.432044	0.0420345	0.262485	-1.12054	0.809271
272	FBgn0001206_Hmr	0.525317	0.326237	0.792578	0.528888	0.412411	0.984993	0.90645	0.525317	0.653487	0.11061	0.326237	1.2178	0.792578	0.70899	0.528888	1.32122	0.412411	0.904232	0.100269	0.984993	0.0188091	1.01543
273	FBgn0001208_Hn	0.155425	0.00200043	0.99441	0.00396133	0.0757685	0.00823331	0.0119427	0.155425	1.94457	0.148787	0.00200043	3.63407	0.99441	0.335229	0.00396133	3.7258	0.0757685	2.74126	0.158139	0.00823331	2.64235	1.88976
274	FBgn0001215_Hrb98DE	0.199478	0.0872102	0.900932	0.168752	0.286566	0.402667	0.421605	0.199478	1.67403	0.0743647	0.0872102	1.80816	0.900932	0.579323	0.168752	1.84495	0.286566	1.28683	0.0583912	0.402667	0.836867	1.36115
275	FBgn0001216_Hsc70-1	0.00594761	0.0398938	0.62334	0.218113	0.000813101	0.505478	0.0048687	0.00594761	5.7871	0.169635	0.0398938	2.15505	0.62334	0.878002	0.218113	1.72849	0.000813101	8.43317	0.186494	0.505478	0.665896	1.36103
276	FBgn0001217_Hsc70-2	0.515307	0.442219	0.692993	0.746359	0.512616	0.652977	0.969885	0.515307	0.67332	0.195988	0.442219	1.06844	0.692993	0.809632	0.746359	1.15363	0.512616	0.678721	0.159268	0.652977	0.449631	1.12621
277	FBgn0001218_Hsc70-3	0.156343	0.058214	0.916651	0.120173	0.148269	0.663944	0.302228	0.156343	1.93814	0.236545	0.058214	1.98642	0.916651	0.555871	0.120173	1.99977	0.148269	1.99601	0.204936	0.663944	0.434474	1.15477
278	FBgn0001220_Hsc70-5	0.499193	0.0754687	0.960913	0.110241	0.452122	0.0922577	0.375504	0.499193	0.706109	0.0580604	0.0754687	1.87176	0.960913	0.47189	0.110241	2.03933	0.452122	0.808639	0.0637328	0.0922577	1.68361	1.39516
279	FBgn0001222_Hsf	0.046095	0.0669405	0.797173	0.197768	0.118644	0.253752	0.246591	0.046095	3.30813	0.0950919	0.0669405	1.92463	0.797173	0.704109	0.197768	1.77292	0.118644	2.24088	0.0860976	0.253752	1.14128	1.28146
280	FBgn0001223_Hsp22	0.281289	0.999453	0.000358978	0.000548515	0.494202	0.00781126	0.00215194	0.281289	1.30653	0.233122	0.999453	0.240504	0.000358978	4.65199	0.000548515	4.9547	0.494202	0.716491	0.158418	0.00781126	-2.66012	0.407071
281	FBgn0001224_Hsp23	0.157076	0.112069	0.853984	0.233247	0.205111	0.121154	0.509911	0.157076	1.93304	0.137938	0.112069	1.69806	0.853984	0.640296	0.233247	1.69805	0.205111	1.64403	0.131972	0.121154	1.54995	1.34898
282	FBgn0001225_Hsp26	0.502068	0.860909	0.228981	0.362344	0.677959	0.426327	0.789917	0.502068	0.700179	0.114937	0.860909	0.631918	0.228981	1.38129	0.362344	1.49728	0.677959	0.392202	0.0700137	0.426327	-0.795493	0.772523
283	FBgn0001226_Hsp27	0.880414	0.147724	0.949107	0.192459	0.809895	0.408279	0.61675	0.880414	0.127741	0.0615273	0.147724	1.57659	0.949107	0.498234	0.192459	1.78526	0.809895	0.211888	0.0773721	0.408279	0.826926	1.22904
284	FBgn0001227_Hsp67Ba	0.118167	0.276254	0.634602	0.618738	0.0806218	0.645193	0.3961	0.118167	2.24533	0.174852	0.276254	1.29557	0.634602	0.866912	0.618738	1.24609	0.0806218	2.67136	0.18384	0.645193	0.46045	1.09131
285	FBgn0001228_CG4456	0.273927	0.17537	0.844579	0.318467	0.110035	0.915811	0.503137	0.273927	1.33468	0.498425	0.17537	1.5007	0.844579	0.651418	0.318467	1.55639	0.110035	2.3242	0.619506	0.915811	0.105712	1.09524
286	FBgn0001229_Hsp67Bc	0.04605	0.543818	0.233216	0.644252	0.0828445	0.554172	0.246378	0.04605	3.30926	0.168853	0.543818	0.957939	0.233216	1.37299	0.644252	1.22644	0.0828445	2.64081	0.147796	0.554172	-0.59152	0.872351
287	FBgn0001230_Hsp68	0.642645	0.0108118	0.996732	0.0131235	0.589719	0.0368125	0.0631423	0.642645	0.446741	0.100183	0.0108118	2.76311	0.996732	0.308816	0.0131235	3.07321	0.589719	0.534649	0.110033	0.0368125	2.08784	1.84984
288	FBgn0001233_Hsp83	0.480185	0.105906	0.940769	0.159913	0.440634	0.0742125	0.370395	0.480185	0.746243	0.0967459	0.105906	1.72288	0.940769	0.514677	0.159913	1.86942	0.440634	0.835361	0.0941808	0.0742125	1.7853	1.29405
289	FBgn0001234_Hsromega	0.71146	0.112517	0.955854	0.152014	0.57931	0.108668	0.498538	0.71146	0.343145	0.0395977	0.112517	1.6963	0.955854	0.483704	0.152014	1.89247	0.57931	0.552908	0.0461782	0.108668	1.60421	1.4734
290	FBgn0001235_hth	0.96549	0.0759309	0.980678	0.0903672	0.968164	0.0802348	0.377375	0.96549	0.0351486	0.0255439	0.0759309	1.86907	0.980678	0.412715	0.0903672	2.13096	0.968164	0.0323785	0.0331051	0.0802348	1.74933	1.41323
291	FBgn0001247_Ide	0.225881	0.547655	0.459032	0.908532	0.0999187	0.963504	0.468271	0.225881	1.54043	0.0783293	0.547655	0.953988	0.459032	1.0492	0.908532	1.05205	0.0999187	2.43131	0.0889124	0.963504	0.0457573	1.02383
292	FBgn0001248_Idh	0.621099	0.0126013	0.995915	0.0155902	0.574108	0.0206724	0.0732653	0.621099	0.481579	0.0872444	0.0126013	2.68924	0.995915	0.31938	0.0155902	2.98418	0.574108	0.562162	0.102028	0.0206724	2.31391	1.61891
293	FBgn0001250_if	0.545567	0.663518	0.484656	0.819114	0.470921	0.65837	0.978066	0.545567	0.614549	0.0476157	0.663518	0.838542	0.484656	1.02069	0.819114	1.1063	0.470921	0.766409	0.0536158	0.65837	-0.442165	0.951033
294	FBgn0001253_ImpE1	0.699345	0.421531	0.754053	0.663814	0.684286	0.908019	0.96253	0.699345	0.360602	0.103784	0.421531	1.09279	0.754053	0.748847	0.663814	1.21181	0.684286	0.382746	0.0982591	0.908019	0.115537	1.02596
295	FBgn0001254_ImpE2	0.137382	0.636046	0.295729	0.64096	1	0.444218	0.587986	0.137382	2.07951	1.62586	0.636046	0.865492	0.295729	1.26396	0.64096	1.22894	1	2.19e-14	1.39e-15	0.444218	-0.76509	0.724908
296	FBgn0001255_ImpE3	0.977463	0.565067	0.681133	0.882015	0.98457	0.914168	0.993231	0.977463	0.0228068	0.0470279	0.565067	0.936202	0.681133	0.821277	0.882015	1.06775	0.98457	0.015556	0.0392355	0.914168	0.107782	1.00389
297	FBgn0001256_ImpL1	0.633617	0.734295	0.429	0.691428	0.694869	0.734583	0.965341	0.633617	0.461187	0.125717	0.734295	0.76874	0.429	1.08391	0.691428	1.19174	0.694869	0.367131	0.119484	0.734583	-0.339035	0.909734
298	FBgn0001257_ImpL2	0.244443	0.966801	0.0320139	0.0566039	0.305956	0.027647	0.154831	0.244443	1.45595	0.153236	0.966801	0.456857	0.0320139	2.25448	0.0566039	2.34971	0.305956	1.21754	0.154536	0.027647	-2.20226	0.609567
299	FBgn0001258_ImpL3	0.0447561	0.843684	0.0435943	0.131764	0.0195747	0.295847	0.111849	0.0447561	3.34217	0.217066	0.843684	0.652462	0.0435943	2.11524	0.131764	1.95765	0.0195747	4.31633	0.233889	0.295847	-1.04538	0.743431
300	FBgn0001259_in	0.888155	0.452565	0.761856	0.686415	0.912346	0.570278	0.973085	0.888155	0.118937	0.0664631	0.452565	1.05654	0.761856	0.740903	0.686415	1.19533	0.912346	0.0919324	0.0606745	0.570278	0.567642	1.18567
301	FBgn0001263_inaD	0.850092	0.0392384	0.99017	0.0462978	0.875337	0.0154638	0.0892688	0.850092	0.163026	0.0696317	0.0392384	2.1625	0.99017	0.367177	0.0462978	2.4453	0.875337	0.13356	0.0588307	0.0154638	2.42133	1.57013
302	FBgn0001269_inv	0.485504	0.772671	0.338755	0.561304	0.517704	0.547411	0.916406	0.485504	0.734848	0.146541	0.772671	0.729795	0.338755	1.19989	0.561304	1.29293	0.517704	0.668536	0.139278	0.547411	-0.601645	0.893357
303	FBgn0001276_ix	0.859342	0.199829	0.92235	0.270959	0.89765	0.16855	0.669619	0.859342	0.152124	0.0685128	0.199829	1.44252	0.92235	0.546803	0.270959	1.62999	0.89765	0.108246	0.0595229	0.16855	1.37688	1.15474
304	FBgn0001280_janA	0.191984	0.55343	0.427048	0.868646	0.0718265	0.687402	0.360597	0.191984	1.71533	0.100693	0.55343	0.948063	0.427048	1.08622	0.868646	1.07578	0.0718265	2.80158	0.128453	0.687402	-0.402383	0.9381
305	FBgn0001281_janB	0.4076	0.283909	0.795899	0.481602	0.23002	0.869837	0.791611	0.4076	0.916464	0.709948	0.283909	1.28292	0.795899	0.705466	0.481602	1.36537	0.23002	1.52098	0.528496	0.869837	0.163866	1.0913
306	FBgn0001285_Jon44E	0.819667	0.195605	0.921447	0.267973	1	0.888686	0.729096	0.819667	0.19978	0.402334	0.195605	1.45207	0.921447	0.548263	0.267973	1.63503	1	1.95e-14	3.14e-16	0.888686	-0.139967	0.997052
307	FBgn0001291_Jra	0.99856	0.246255	0.908687	0.329576	0.991694	0.143225	0.604451	0.99856	0.00144079	0.00355584	0.246255	1.34828	0.908687	0.568013	0.329576	1.54072	0.991694	0.00834212	0.00714236	0.143225	1.46389	1.27646
308	FBgn0001296_kar	0.490984	0.0132611	0.993905	0.0178911	0.528466	0.00170967	0.0102143	0.490984	0.723242	0.153699	0.0132611	2.6648	0.993905	0.339829	0.0178911	2.91382	0.528466	0.647332	0.125515	0.00170967	3.13652	1.86747
309	FBgn0001297_kay	0.901594	0.0275631	0.994148	0.0311569	0.974531	0.0551444	0.154393	0.901594	0.103841	0.0305548	0.0275631	2.32273	0.994148	0.337647	0.0311569	2.63699	0.974531	0.025814	0.0129447	0.0551444	1.91774	1.65239
310	FBgn0001301_kel	0.187467	0.206566	0.77225	0.415215	0.332439	0.327228	0.71223	0.187467	1.74106	0.0950224	0.206566	1.42767	0.77225	0.73023	0.415215	1.43448	0.332439	1.12999	0.0782599	0.327228	0.979714	1.23168
311	FBgn0001308_Khc	0.952565	0.237664	0.909716	0.320442	0.904438	0.228358	0.788897	0.952565	0.0486518	0.018805	0.237664	1.36443	0.909716	0.566475	0.320442	1.55356	0.904438	0.100676	0.0316649	0.228358	1.2046	1.27891
312	FBgn0001311_kkv	0.803693	0.0407035	0.988929	0.0490553	0.675811	0.050859	0.220677	0.803693	0.219653	0.0799683	0.0407035	2.14602	0.988929	0.374554	0.0490553	2.41768	0.675811	0.395434	0.118406	0.050859	1.95267	1.46064
313	FBgn0001313_kl-2	NA	NA	NA	NA	NA	NA	1	NA	NA	NA	NA	NA	NA	NA	NA	NA	NA	NA	NA	NA	NA	NA
314	FBgn0001316_klar	0.692106	0.399436	0.770191	0.625255	0.496588	0.756743	0.95308	0.692106	0.371184	0.0619676	0.399436	1.11973	0.770191	0.732353	0.625255	1.241	0.496588	0.711515	0.0878654	0.756743	0.309761	1.115
315	FBgn0001319_kn	0.672936	0.0401184	0.98636	0.0512469	0.434295	0.211434	0.217821	0.672936	0.399777	0.0700925	0.0401184	2.15253	0.98636	0.388118	0.0512469	2.39687	0.434295	0.850418	0.100264	0.211434	1.24963	1.45611
316	FBgn0001320_kni	0.428879	0.00678613	0.996252	0.00939085	0.0672792	0.0893732	0.0400322	0.428879	0.863469	0.118105	0.00678613	2.99262	0.996252	0.31523	0.00939085	3.24947	0.0672792	2.87562	0.162642	0.0893732	1.69871	1.99249
317	FBgn0001321_knk	0.65567	0.495837	0.681706	0.812045	0.639165	0.879172	0.983578	0.65567	0.426268	0.0836677	0.495837	1.00853	0.681706	0.820714	0.812045	1.11076	0.639165	0.452284	0.108625	0.879172	0.152018	1.07114
318	FBgn0001323_knrl	0.899915	0.649174	0.585356	0.935229	0.940731	0.873879	0.994918	0.899915	0.105714	0.0269676	0.649174	0.852603	0.585356	0.915739	0.935229	1.03655	0.940731	0.0611844	0.0231108	0.873879	-0.158734	0.954716
319	FBgn0001324_kto	0.835329	0.254021	0.890284	0.357348	0.791376	0.201251	0.740306	0.835329	0.180684	0.0581464	0.254021	1.33411	0.890284	0.594157	0.357348	1.50366	0.791376	0.23526	0.0704059	0.201251	1.278	1.24734
320	FBgn0001325_Kr	0.662774	0.919968	0.172774	0.247541	0.859045	0.300183	0.679561	0.662774	0.415281	0.0978912	0.919968	0.550636	0.172774	1.50732	0.247541	1.67106	0.859045	0.152472	0.0592451	0.300183	-1.03604	0.770558
321	FBgn0001330_kz	0.652522	0.222553	0.88874	0.328421	0.764114	0.16845	0.66938	0.652522	0.431177	0.0869252	0.222553	1.39415	0.88874	0.596251	0.328421	1.54233	0.764114	0.270729	0.0764495	0.16845	1.3772	1.25239
322	FBgn0001341_l(1)1Bi	0.618566	0.603482	0.56946	0.965593	0.541715	0.68395	0.990736	0.618566	0.485758	0.0979118	0.603482	0.897653	0.56946	0.931749	0.965593	1.01923	0.541715	0.621838	0.116974	0.68395	-0.407079	0.955002
323	FBgn0001404_egh	0.414656	0.266806	0.811855	0.44844	0.298444	0.570566	0.84465	0.414656	0.898576	0.0529527	0.266806	1.3116	0.811855	0.688286	0.44844	1.39872	0.298444	1.24382	0.0559108	0.570566	0.567218	1.19056
324	FBgn0001491_l(1)10Bb	0.872631	0.608943	0.621256	0.987509	0.755549	0.852051	0.996424	0.872631	0.136675	0.0192541	0.608943	0.892235	0.621256	0.880057	0.987509	1.00694	0.755549	0.282145	0.0314016	0.852051	-0.186502	0.990329
325	FBgn0001565_Hlc	0.508226	0.0890732	0.953729	0.130759	0.774027	0.0952234	0.428652	0.508226	0.687595	0.106347	0.0890732	1.79887	0.953729	0.488418	0.130759	1.96115	0.774027	0.25768	0.0770656	0.0952234	1.66847	1.36063
326	FBgn0001612_Grip91	0.180612	0.124216	0.85376	0.249248	0.131197	0.384602	0.548788	0.180612	1.78136	0.111282	0.124216	1.65286	0.85376	0.640563	0.249248	1.66794	0.131197	2.13008	0.104534	0.384602	0.869448	1.37952
327	FBgn0001624_dlg1	0.329164	0.425732	0.639922	0.781766	0.559182	0.684289	0.908863	0.329164	1.14041	0.0800753	0.425732	1.08778	0.639922	0.861684	0.781766	1.13019	0.559182	0.589209	0.0644031	0.684289	0.406617	1.05431
328	FBgn0001941_ifc	0.575638	0.041243	0.982985	0.0555685	0.6239	0.125826	0.223304	0.575638	0.55943	0.0403031	0.041243	2.14011	0.982985	0.403428	0.0555685	2.35845	0.6239	0.47698	0.0378742	0.125826	1.53077	1.57668
329	FBgn0001942_eIF4A	0.622924	0.18598	0.907802	0.272887	0.442444	0.117916	0.528957	0.622924	0.478579	0.0753024	0.18598	1.47458	0.907802	0.569327	0.272887	1.62676	0.442444	0.831102	0.0760401	0.117916	1.56358	1.22436
330	FBgn0001961_Arpc1	0.948469	0.246273	0.9048	0.33401	0.880048	0.102386	0.476956	0.948469	0.0529717	0.0373476	0.246273	1.34825	0.9048	0.573739	0.33401	1.53461	0.880048	0.128159	0.054699	0.102386	1.6334	1.2544
331	FBgn0001965_Sos	0.620763	0.452685	0.711319	0.738553	0.636282	0.761021	0.97312	0.620763	0.482132	0.069862	0.452685	1.05641	0.711319	0.791573	0.738553	1.15891	0.636282	0.4569	0.0723086	0.761021	0.304141	1.03564
332	FBgn0001967_NimC3	0.484462	0.0100759	0.995334	0.0135164	1	0.735601	0.0589526	0.484462	0.737068	0.903482	0.0100759	2.79737	0.995334	0.325953	0.0135164	3.05788	1	0	1.38e-16	0.735601	-0.337685	0.689351
333	FBgn0001970_Pgant35A	0.654103	0.0517359	0.980999	0.067767	0.474729	0.0480132	0.255636	0.654103	0.428708	0.115954	0.0517359	2.03881	0.980999	0.41147	0.067767	2.26496	0.474729	0.758069	0.177083	0.0480132	1.97725	1.38303
334	FBgn0001974_l(2)35Bd	0.0635678	0.732832	0.127784	0.338171	0.0777436	0.58993	0.325692	0.0635678	2.94004	0.143253	0.732832	0.770203	0.127784	1.64042	0.338171	1.52894	0.0777436	2.71227	0.14311	0.58993	-0.538938	0.849262
335	FBgn0001977_CIAPIN1	0.910078	0.0431266	0.989904	0.0500644	0.817653	0.0353058	0.193995	0.910078	0.0944312	0.0343946	0.0431266	2.12008	0.989904	0.368815	0.0500644	2.40798	0.817653	0.202263	0.0596299	0.0353058	2.10483	1.42355
336	FBgn0001978_stc	0.684472	0.284456	0.852723	0.426461	0.582866	0.791846	0.86578	0.684472	0.38247	0.0699645	0.284456	1.28203	0.852723	0.641802	0.426461	1.42209	0.582866	0.546631	0.0776817	0.791846	0.263914	1.00703
337	FBgn0001981_esg	0.360245	0.590246	0.492482	0.900569	0.466728	0.801935	0.931438	0.360245	1.0456	0.318772	0.590246	0.910843	0.492482	1.01217	0.900569	1.05674	0.466728	0.775673	0.305366	0.801935	-0.250844	0.968813
338	FBgn0001983_wor	0.425936	0.60129	0.509059	0.906487	1	0.0086724	0.0509192	0.425936	0.870631	1.86872	0.60129	0.899832	0.509059	0.99435	0.906487	1.05325	1	0	3.39e-17	0.0086724	-2.62471	0.225511
339	FBgn0001986_Mtr4	0.660013	0.0208868	0.993408	0.0259029	0.75242	0.00661257	0.0390253	0.660013	0.419537	0.0950421	0.0208868	2.45066	0.993408	0.34408	0.0259029	2.72801	0.75242	0.286351	0.0986278	0.00661257	2.71575	1.72462
340	FBgn0001987_Gli	0.680601	0.910584	0.192067	0.276072	0.466261	0.405109	0.721868	0.680601	0.388243	0.0305869	0.910584	0.565173	0.192067	1.46022	0.276072	1.62149	0.466261	0.776709	0.0447898	0.405109	-0.832532	0.747426
341	FBgn0001989_ND-B17	0.65732	0.153843	0.930193	0.218547	0.591954	0.263403	0.632966	0.65732	0.423706	0.094365	0.153843	1.55868	0.930193	0.533711	0.218547	1.72759	0.591954	0.530771	0.0754677	0.263403	1.11838	1.27128
342	FBgn0001990_wek	0.296975	0.155618	0.869545	0.275058	0.185666	0.528455	0.637561	0.296975	1.24904	0.112358	0.155618	1.55361	0.869545	0.621222	0.275058	1.62316	0.185666	1.7515	0.104271	0.528455	0.630366	1.40626
343	FBgn0001991_Ca-alpha1D	0.154541	0.0862539	0.88232	0.179678	0.118578	0.327165	0.41796	0.154541	1.95078	0.0829204	0.0862539	1.813	0.88232	0.604807	0.179678	1.81646	0.118578	2.24149	0.0895527	0.327165	0.979841	1.21307
344	FBgn0001992_Cyp303a1	0.777743	0.201912	0.914452	0.281537	1	0.857327	0.741593	0.777743	0.252834	0.439601	0.201912	1.43788	0.914452	0.559283	0.281537	1.61257	1	3.13e-14	2.18e-15	0.857327	-0.179778	0.899974
345	FBgn0001994_crp	0.0212611	0.265041	0.39123	0.841925	0.0237217	0.808799	0.120975	0.0212611	4.21729	0.107832	0.265041	1.31465	0.39123	1.13001	0.841925	1.09209	0.0237217	4.08663	0.100509	0.808799	0.241975	1.04187
346	FBgn0001995_mRpL4	0.0198216	0.13036	0.569179	0.459696	0.0104808	0.387149	0.0612599	0.0198216	4.30128	0.154035	0.13036	1.63164	0.569179	0.932033	0.459696	1.38716	0.0104808	5.07744	0.165444	0.387149	0.8648	1.14705
347	FBgn0002021_l(2)37Bb	0.870166	0.254799	0.893224	0.354884	0.912053	0.124941	0.551024	0.870166	0.139522	0.0466914	0.254799	1.33271	0.893224	0.590134	0.354884	1.50683	0.912053	0.0922544	0.0513815	0.124941	1.53436	1.2011
348	FBgn0002022_Catsup	0.622818	0.000346009	0.999912	0.000380957	0.622172	0.00361398	0.00207426	0.622818	0.478754	0.0670993	0.000346009	4.67548	0.999912	0.191327	0.000380957	5.20523	0.622172	0.479814	0.0809192	0.00361398	2.91003	2.07475
349	FBgn0002023_Lim3	0.246335	0.237503	0.77551	0.448935	0.22393	0.817353	0.781523	0.246335	1.44772	0.121132	0.237503	1.36473	0.77551	0.726858	0.448935	1.39821	0.22393	1.54973	0.117319	0.817353	0.230951	1.03992
350	FBgn0002031_l(2)37Cc	0.973063	0.00929244	0.998652	0.00961691	0.974775	0.00681719	0.0402124	0.973063	0.0273242	0.0154282	0.00929244	2.83691	0.998652	0.271785	0.00961691	3.23679	0.974775	0.0255638	0.0167882	0.00681719	2.70564	1.84875
351	FBgn0002036_CG10561	0.137241	0.08497	0.874044	0.183131	0.217177	0.222195	0.413035	0.137241	2.08063	0.128799	0.08497	1.81959	0.874044	0.615526	0.183131	1.80781	0.217177	1.58258	0.100873	0.222195	1.22071	1.4258
352	FBgn0002044_swm	0.908689	0.295095	0.873305	0.414929	0.853175	0.25331	0.826682	0.908689	0.0959656	0.0271099	0.295095	1.26496	0.873305	0.616469	0.414929	1.4348	0.853175	0.159379	0.0279847	0.25331	1.14235	1.19596
353	FBgn0002069_AspRS	0.992888	0.0428643	0.991093	0.0483148	0.947298	0.0496441	0.231151	0.992888	0.00713868	0.0100613	0.0428643	2.12281	0.991093	0.361245	0.0483148	2.42493	0.947298	0.0542099	0.0323186	0.0496441	1.96302	1.50368
354	FBgn0002121_l(2)gl	0.919019	0.0698011	0.981625	0.0837843	0.989534	0.179711	0.352179	0.919019	0.0846145	0.032492	0.0698011	1.90616	0.981625	0.409002	0.0837843	2.16601	0.989534	0.0105241	0.0121802	0.179711	1.34165	1.38482
355	FBgn0002174_l(2)tid	0.690003	0.180009	0.918516	0.256112	0.52371	0.608828	0.696012	0.690003	0.37428	0.101958	0.180009	1.4891	0.918516	0.552942	0.256112	1.6556	0.52371	0.656645	0.137848	0.608828	0.511747	1.11439
356	FBgn0002183_dre4	0.770308	0.130409	0.950816	0.174403	0.859101	0.0399446	0.216971	0.770308	0.262555	0.0736199	0.130409	1.63148	0.950816	0.49467	0.174403	1.82999	0.859101	0.152406	0.0746909	0.0399446	2.05432	1.35758
357	FBgn0002283_l(3)73Ah	0.414698	0.000213088	0.999849	0.000274955	0.40653	0.00119094	0.00127785	0.414698	0.898472	0.118255	0.000213088	4.99213	0.999849	0.204246	0.000274955	5.43632	0.40653	0.919204	0.115517	0.00119094	3.24104	2.29261
358	FBgn0002284_Prosbeta6	0.678023	0.094183	0.96274	0.127239	0.797965	0.247534	0.447614	0.678023	0.392107	0.0738447	0.094183	1.77438	0.96274	0.46739	0.127239	1.97363	0.797965	0.226879	0.0604727	0.247534	1.15636	1.29398
359	FBgn0002306_sas	0.870012	0.268692	0.885138	0.37691	0.847571	0.134268	0.578982	0.870012	0.1397	0.0324468	0.268692	1.30836	0.885138	0.601079	0.37691	1.47916	0.847571	0.166018	0.0389047	0.134268	1.49748	1.32378
360	FBgn0002354_l(3)87Df	0.54548	0.322855	0.79978	0.518319	0.338822	0.61801	0.903597	0.54548	0.614713	0.0767396	0.322855	1.22274	0.79978	0.701326	0.518319	1.33078	0.338822	1.10998	0.100641	0.61801	0.498672	1.19353
361	FBgn0002413_dco	0.275367	0.743953	0.286582	0.532568	0.284281	0.504785	0.85522	0.275367	1.32911	0.0534355	0.743953	0.759051	0.286582	1.27858	0.532568	1.31794	0.284281	1.29531	0.050874	0.504785	-0.66698	0.859719
362	FBgn0002431_hyd	0.536464	0.46982	0.674392	0.793111	0.380791	0.579929	0.943633	0.536464	0.631863	0.0448329	0.46982	1.03708	0.674392	0.827886	0.793111	1.12285	0.380791	0.987511	0.0525671	0.579929	0.553488	1.08802
363	FBgn0002440_l(3)mbn	0.307705	0.712109	0.337608	0.618132	1	0.725344	0.88991	0.307705	1.21152	0.961212	0.712109	0.790792	0.337608	1.20151	0.618132	1.24656	1	0	2.06e-16	0.725344	0.351325	1.28819
364	FBgn0002441_l(3)mbt	0.765432	0.186343	0.921898	0.258675	0.754638	0.0921221	0.44003	0.765432	0.268983	0.074035	0.186343	1.47371	0.921898	0.547535	0.258675	1.65107	0.754638	0.283369	0.0750531	0.0921221	1.68431	1.23907
365	FBgn0002466_sti	0.132687	0.110674	0.83942	0.241283	0.139847	0.320342	0.505274	0.132687	2.11768	0.425399	0.110674	1.70355	0.83942	0.657406	0.241283	1.68268	0.139847	2.06001	0.388939	0.320342	0.993755	1.30161
366	FBgn0002521_pho	0.987105	0.0519287	0.98851	0.0594966	0.913026	0.0573079	0.273817	0.987105	0.0129831	0.0221141	0.0519287	2.03715	0.98851	0.376911	0.0594966	2.32617	0.913026	0.0911832	0.0716861	0.0573079	1.90096	1.53954
367	FBgn0002522_lab	0.479079	0.64885	0.478616	0.827677	0.499651	0.44576	0.971014	0.479079	0.748629	0.154399	0.64885	0.852921	0.478616	1.02733	0.827677	1.10093	0.499651	0.705163	0.169619	0.44576	-0.762503	0.852836
368	FBgn0002524_lace	0.77908	0.876303	0.267153	0.384943	0.773059	0.422819	0.84509	0.77908	0.251096	0.0275348	0.876303	0.612633	0.267153	1.31101	0.384943	1.46945	0.773059	0.258947	0.0304929	0.422819	-0.80154	0.819741
369	FBgn0002525_Lam	0.733062	0.0663505	0.977576	0.0852251	0.610583	0.0585187	0.303582	0.733062	0.312779	0.0392454	0.0663505	1.92854	0.977576	0.424077	0.0852251	2.1581	0.610583	0.499045	0.0527682	0.0585187	1.89179	1.50388
370	FBgn0002526_LanA	0.421593	0.299619	0.787047	0.506605	0.628405	0.290368	0.872298	0.421593	0.881298	0.0732154	0.299619	1.25786	0.787047	0.714822	0.506605	1.34157	0.628405	0.469625	0.0426043	0.290368	1.05731	1.35111
371	FBgn0002531_Lcp1	0.650366	0.856916	0.270728	0.408573	1	0.486736	0.84957	0.650366	0.434553	1.04419	0.856916	0.63677	0.270728	1.30489	0.408573	1.44194	1	0	3.36e-18	0.486736	-0.695509	0.746518
372	FBgn0002533_Lcp2	0.872207	0.615074	0.615074	1	1	0.0713684	0.358701	0.872207	0.137164	1.03528	0.615074	0.886165	0.615074	0.886165	1	1	1	0	2.13e-17	0.0713684	1.80313	1.16555
373	FBgn0002534_Lcp3	0.478603	0.349545	0.761941	0.58295	1	0.730694	0.924264	0.478603	0.749658	0.774355	0.349545	1.18487	0.761941	0.740816	0.58295	1.27481	1	0	0	0.730694	-0.344202	0.848623
374	FBgn0002535_Lcp4	0.279219	0.999516	0.000303622	0.00046416	1	0.109239	0.00182035	0.279219	1.31437	2.47959	0.999516	0.236682	0.000303622	4.75952	0.00046416	5.06846	1	0	2.66e-17	0.109239	1.60162	2.33516
375	FBgn0002542_lds	0.3028	0.31577	0.729906	0.577688	0.372633	0.637446	0.885147	0.3028	1.2285	0.135465	0.31577	1.23322	0.729906	0.773123	0.577688	1.27916	0.372633	1.01017	0.118754	0.637446	0.471272	1.21983
376	FBgn0002543_robo2	0.9823	0.0656039	0.984353	0.0767009	0.972937	0.0263727	0.148163	0.9823	0.0178657	0.0188076	0.0656039	1.93354	0.984353	0.397506	0.0767009	2.20709	0.972937	0.0274538	0.0292085	0.0263727	2.22068	1.44976
377	FBgn0002552_lin	0.561159	0.123493	0.938459	0.18016	0.507055	0.0659043	0.335725	0.561159	0.585583	0.140614	0.123493	1.65543	0.938459	0.518991	0.18016	1.81524	0.507055	0.689975	0.13057	0.0659043	1.83907	1.36901
378	FBgn0002561_l(1)sc	NA	NA	NA	NA	NA	NA	1	NA	NA	NA	NA	NA	NA	NA	NA	NA	NA	NA	NA	NA	NA	NA
379	FBgn0002562_Lsp1alpha	0.133404	7.02e-06	0.999826	1.42e-05	0.112934	0.778927	4.21e-05	0.133404	2.11176	1.0457	7.02e-06	7.66015	0.999826	0.207859	1.42e-05	7.88205	0.112934	2.29541	0.534925	0.778927	0.280718	1.33129
380	FBgn0002563_Lsp1beta	0.302062	0.000458241	0.999418	0.000682774	0.437243	0.2421	0.0027463	0.302062	1.23108	0.582108	0.000458241	4.49805	0.999418	0.242509	0.000682774	4.80806	0.437243	0.843388	0.306864	0.2421	1.16975	1.75912
381	FBgn0002564_Lsp1gamma	0.651412	0.868405	0.253794	0.380067	0.461943	0.416111	0.827356	0.651412	0.432914	0.299944	0.868405	0.622651	0.253794	1.33452	0.380067	1.47532	0.461943	0.786353	0.387624	0.416111	-0.813186	0.873306
382	FBgn0002565_Lsp2	0.485208	0.00283009	0.998725	0.00363869	0.455775	0.767117	0.0168609	0.485208	0.735477	0.786791	0.00283009	3.44559	0.998725	0.269682	0.00363869	3.77449	0.455775	0.800291	0.342794	0.767117	-0.296148	0.697536
383	FBgn0002566_lt	0.885769	0.0378827	0.991096	0.0439814	0.976855	0.120401	0.206827	0.885769	0.121642	0.0492535	0.0378827	2.17833	0.991096	0.361222	0.0439814	2.46989	0.976855	0.0234295	0.0164326	0.120401	1.55309	1.57679
384	FBgn0002567_Rab32	0.0798945	0.211296	0.652464	0.519753	0.0350791	0.411025	0.192858	0.0798945	2.68155	0.110679	0.211296	1.41751	0.652464	0.849377	0.519753	1.32947	0.0350791	3.62526	0.119847	0.411025	0.822091	1.27929
385	FBgn0002569_Mal-A2	0.393423	0.0632399	0.959292	0.0984874	0.552924	0.0381533	0.208164	0.393423	0.953403	0.159475	0.0632399	1.94976	0.959292	0.475773	0.0984874	2.09121	0.552924	0.600776	0.136995	0.0381533	2.0732	1.46629
386	FBgn0002570_Mal-A1	0.923392	0.830456	0.364832	0.528151	0.961625	0.516471	0.934336	0.923392	0.0798495	0.0485611	0.830456	0.667642	0.364832	1.16419	0.528151	1.32188	0.961625	0.0391667	0.0331006	0.516471	-0.648794	0.808692
387	FBgn0002571_Mal-A3	0.476334	0.112943	0.935877	0.171671	1	0.895903	0.512797	0.476334	0.754575	0.805526	0.112943	1.69465	0.935877	0.523703	0.171671	1.83716	1	0	1.92e-16	0.895903	-0.130839	0.915882
388	FBgn0002573_sens	0.245936	0.547793	0.472748	0.9228	0.461905	0.829184	0.816156	0.245936	1.44945	0.263223	0.547793	0.953846	0.472748	1.03382	0.9228	1.04373	0.461905	0.786438	0.186439	0.829184	-0.215749	0.971237
389	FBgn0002576_lz	0.113106	0.824381	0.109817	0.250115	0.0465577	0.470159	0.248781	0.113106	2.29373	0.131137	0.824381	0.674466	0.109817	1.70697	0.250115	1.66636	0.0465577	3.29661	0.122899	0.470159	-0.72222	0.793253
390	FBgn0002577_m	0.454747	0.259809	0.827697	0.426103	0.354422	0.696647	0.835539	0.454747	0.802634	0.346394	0.259809	1.3238	0.827697	0.670752	0.426103	1.42248	0.354422	1.0627	0.325866	0.696647	0.389851	1.09081
391	FBgn0002578_Kaz-m1	0.166394	0.689917	0.271057	0.56318	0.297633	0.696373	0.664445	0.166394	1.87031	0.824183	0.689917	0.812655	0.271057	1.30433	0.56318	1.29134	0.297633	1.2467	0.559269	0.696373	-0.390222	0.864361
392	FBgn0002579_RpL36	0.772281	0.0362803	0.989851	0.0439854	0.856851	0.0296035	0.164983	0.772281	0.259965	0.136573	0.0362803	2.19783	0.989851	0.369137	0.0439854	2.46985	0.856851	0.155048	0.105748	0.0296035	2.17536	1.54625
393	FBgn0002590_RpS5a	0.708538	0.143816	0.939899	0.198797	0.833922	0.142394	0.602142	0.708538	0.347327	0.139089	0.143816	1.5884	0.939899	0.516313	0.198797	1.77056	0.833922	0.182385	0.119985	0.142394	1.46694	1.37173
394	FBgn0002592_E(spl)m2-BFM	0.714561	0.810482	0.351385	0.536125	0.573037	0.54752	0.92554	0.714561	0.338727	0.150578	0.810482	0.689782	0.351385	1.18234	0.536125	1.31478	0.573037	0.564078	0.182349	0.54752	-0.601481	0.863715
395	FBgn0002593_RpLP1	0.217614	0.0558966	0.938401	0.104154	0.306963	0.0876962	0.291863	0.217614	1.58042	0.11851	0.0558966	2.00443	0.938401	0.519097	0.104154	2.06545	0.306963	1.21407	0.101618	0.0876962	1.70768	1.4706
396	FBgn0002609_E(spl)m3-HLH	0.992154	0.050414	0.989014	0.0575334	0.888159	0.165195	0.266828	0.992154	0.00787828	0.0152587	0.050414	2.05033	0.989014	0.374068	0.0575334	2.34201	0.888159	0.118932	0.0441814	0.165195	1.38781	1.5395
397	FBgn0002622_RpS3	0.732533	0.156031	0.935362	0.215318	0.94415	0.268243	0.638625	0.732533	0.31351	0.145523	0.156031	1.55244	0.935362	0.52463	0.215318	1.73434	0.94415	0.0575471	0.076192	0.268243	1.10712	1.32147
398	FBgn0002626_RpL32	0.789287	0.0902746	0.96979	0.116054	0.88143	0.0256301	0.144257	0.789287	0.237932	0.158298	0.0902746	1.79299	0.96979	0.448568	0.116054	2.01576	0.88143	0.126581	0.116724	0.0256301	2.23177	1.43605
399	FBgn0002629_E(spl)m4-BFM	NA	NA	NA	NA	NA	NA	1	NA	NA	NA	NA	NA	NA	NA	NA	NA	NA	NA	NA	NA	NA	NA
400	FBgn0002631_E(spl)m5-HLH	0.039376	0.0848733	0.744502	0.259351	1	0.106221	0.214184	0.039376	3.49059	3.31416	0.0848733	1.82009	0.744502	0.758499	0.259351	1.64989	1	0	1e-16	0.106221	1.61542	1.72478
401	FBgn0002632_E(spl)m6-BFM	0.817317	0.97143	0.0889633	0.113014	0.77811	0.276025	0.428238	0.817317	0.202678	0.23852	0.97143	0.44379	0.0889633	1.79941	0.113014	2.02793	0.77811	0.252356	0.310745	0.276025	-1.08929	0.717586
402	FBgn0002633_E(spl)m7-HLH	0.468543	0.888089	0.182229	0.288023	0.705833	0.72204	0.700918	0.468543	0.771652	0.503704	0.888089	0.597128	0.182229	1.48365	0.288023	1.6022	0.705833	0.351215	0.328279	0.72204	-0.355733	0.925699
403	FBgn0002638_Rcc1	0.930421	0.19644	0.929131	0.26018	0.945619	0.448645	0.730778	0.930421	0.0722394	0.0365473	0.19644	1.45017	0.929131	0.535529	0.26018	1.64844	0.945619	0.055988	0.0360608	0.448645	0.757675	1.2682
404	FBgn0002641_mal	0.575361	0.352023	0.78361	0.564054	0.424709	0.746879	0.925978	0.575361	0.559925	0.0814972	0.352023	1.18147	0.78361	0.718426	0.564054	1.2906	0.424709	0.873633	0.0978338	0.746879	0.322757	1.20915
405	FBgn0002643_mam	0.0548204	0.88157	0.0345883	0.098811	0.0705316	0.0832897	0.190391	0.0548204	3.10891	0.0681423	0.88157	0.605792	0.0345883	2.21941	0.098811	2.0897	0.0705316	2.82215	0.0663339	0.0832897	-1.73191	0.66739
406	FBgn0002645_Map205	0.614559	0.164427	0.919839	0.239417	0.844513	0.393036	0.659665	0.614559	0.492405	0.047926	0.164427	1.52926	0.919839	0.550841	0.239417	1.68621	0.844513	0.169662	0.025989	0.393036	0.854124	1.34063
407	FBgn0002673_twe	0.120132	0.903301	0.0549358	0.122801	0.206656	0.288266	0.287528	0.120132	2.22712	0.208563	0.903301	0.575917	0.0549358	2.01213	0.122801	1.98987	0.206656	1.63595	0.160328	0.288266	-1.06193	0.672984
408	FBgn0002707_mei-9	0.502703	0.709171	0.419664	0.707172	0.566907	0.978021	0.961799	0.502703	0.698875	0.0997515	0.709171	0.793695	0.419664	1.09503	0.707172	1.18058	0.566907	0.575117	0.0890085	0.978021	-0.0275504	0.989875
409	FBgn0002709_mei-218	0.558799	0.738613	0.402779	0.660577	0.660649	0.366978	0.935655	0.558799	0.589913	0.101844	0.738613	0.764416	0.402779	1.11559	0.660577	1.21421	0.660649	0.418554	0.0983989	0.366978	-0.902148	0.894339
410	FBgn0002715_mei-S332	0.386972	0.830603	0.234097	0.39609	0.441152	0.389723	0.798144	0.386972	0.970677	0.119324	0.830603	0.667475	0.234097	1.37128	0.39609	1.45628	0.441152	0.834141	0.113098	0.389723	-0.86012	0.80363
411	FBgn0002716_mei-W68	0.277226	0.971695	0.0309166	0.0523828	0.26013	0.695039	0.17174	0.277226	1.32197	0.310199	0.971695	0.443	0.0309166	2.27034	0.0523828	2.38645	0.26013	1.38964	0.218682	0.695039	-0.392026	0.820893
412	FBgn0002719_Men	0.315155	0.000247326	0.999682	0.000358546	0.287679	0.0141505	0.00148304	0.315155	1.18626	0.153956	0.000247326	4.89336	0.999682	0.224218	0.000358546	5.24769	0.287679	1.28272	0.129292	0.0141505	2.45342	2.27257
413	FBgn0002723_Met	0.688049	0.305525	0.838838	0.46156	0.55948	0.328122	0.887814	0.688049	0.377165	0.0482518	0.305525	1.24872	0.838838	0.658077	0.46156	1.38527	0.55948	0.588662	0.0589344	0.328122	0.977904	1.31704
414	FBgn0002732_E(spl)malpha-BFM	0.220548	0.158811	0.838216	0.304038	0.275547	0.289519	0.645708	0.220548	1.56605	0.546333	0.158811	1.54463	0.838216	0.658794	0.304038	1.57755	0.275547	1.32842	0.53666	0.289519	1.05918	1.23948
415	FBgn0002733_E(spl)mbeta-HLH	0.269313	0.0512433	0.952928	0.0890942	0.586479	0.0855485	0.270662	0.269313	1.35273	0.173231	0.0512433	2.04307	0.952928	0.49016	0.0890942	2.13753	0.586479	0.540296	0.114174	0.0855485	1.71936	1.46666
416	FBgn0002734_E(spl)mdelta-HLH	0.724586	0.571215	0.627649	0.942887	1	0.463562	0.97617	0.724586	0.32458	0.658637	0.571215	0.929973	0.627649	0.873755	0.942887	1.03215	1	0	0	0.463562	-0.732995	0.676632
417	FBgn0002735_E(spl)mgamma-HLH	0.100793	0.276389	0.610681	0.640486	1	0.0515874	0.272247	0.100793	2.42161	2.75362	0.276389	1.29534	0.610681	0.890512	0.640486	1.2293	1	0	1.31e-16	0.0515874	-1.94656	0.406399
418	FBgn0002736_mago	0.179346	0.0645256	0.918033	0.127994	0.148156	0.20886	0.32982	0.179346	1.78898	0.0845462	0.0645256	1.94086	0.918033	0.553703	0.127994	1.97092	0.148156	1.99685	0.0974188	0.20886	1.25671	1.30886
419	FBgn0002772_Mlc1	0.00116346	0.232068	0.114843	0.768775	0.00255668	0.653768	0.00696047	0.00116346	7.93847	0.12392	0.232068	1.37523	0.114843	1.68732	0.768775	1.1387	0.00255668	6.87995	0.124603	0.653768	-0.448534	0.909663
420	FBgn0002773_Mlc2	0.385421	0.000605521	0.999544	0.000821379	0.266499	0.0113466	0.00362763	0.385421	0.974875	0.0855005	0.000605521	4.32625	0.999544	0.23485	0.000821379	4.68645	0.266499	1.3639	0.0870711	0.0113466	2.53184	2.32926
421	FBgn0002774_mle	0.35112	0.56799	0.510978	0.941979	0.354298	0.989333	0.925357	0.35112	1.07252	0.0710849	0.56799	0.933237	0.510978	0.992309	0.941979	1.03267	0.354298	1.06306	0.0746997	0.989333	-0.0133701	0.997378
422	FBgn0002775_msl-3	0.393681	0.536657	0.561404	0.974875	0.360655	0.96766	0.931701	0.393681	0.952721	0.112583	0.536657	0.965346	0.561404	0.939924	0.974875	1.01401	0.360655	1.04441	0.115471	0.96766	-0.0405439	0.993019
423	FBgn0002778_mnd	0.125161	0.35177	0.562651	0.775818	0.0379595	0.748549	0.207206	0.125161	2.18191	0.0848012	0.35177	1.18181	0.562651	0.938656	0.775818	1.13407	0.0379595	3.53321	0.0992049	0.748549	0.320553	1.07486
424	FBgn0002780_mod	0.862614	0.663811	0.562559	0.897317	0.925204	0.796481	0.992993	0.862614	0.148297	0.0378951	0.663811	0.838255	0.562559	0.938749	0.897317	1.05866	0.925204	0.0778817	0.0251927	0.796481	-0.257904	0.907266
425	FBgn0002781_mod(mdg4)	0.519284	0.139993	0.923861	0.2108	0.464151	0.110722	0.505433	0.519284	0.665392	0.12603	0.139993	1.60027	0.923861	0.544339	0.2108	1.74396	0.464151	0.78141	0.124823	0.110722	1.59496	1.34238
426	FBgn0002783_mor	0.827122	0.261659	0.884933	0.370428	0.813335	0.136717	0.586076	0.827122	0.190643	0.0570667	0.261659	1.32055	0.884933	0.601352	0.370428	1.48714	0.813335	0.207608	0.0463069	0.136717	1.48813	1.29971
427	FBgn0002787_Rpn8	0.893677	0.190536	0.929565	0.254219	0.744679	0.154876	0.635646	0.893677	0.112705	0.0474695	0.190536	1.46379	0.929565	0.534788	0.254219	1.65897	0.744679	0.296833	0.0684366	0.154876	1.42252	1.2988
428	FBgn0002789_Mp20	0.405927	1.47e-06	0.999997	1.79e-06	0.266277	0.00115634	8.81e-06	0.405927	0.920753	0.0886387	1.47e-06	9.19327	0.999997	0.12841	1.79e-06	10.034	0.266277	1.36479	0.0987372	0.00115634	3.24944	3.27591
429	FBgn0002791_mr	0.310735	0.317186	0.732152	0.577134	0.233187	0.553279	0.796701	0.310735	1.20117	0.0905938	0.317186	1.23111	0.732152	0.770881	0.577134	1.27962	0.233187	1.50634	0.0816774	0.553279	0.592854	1.11673
430	FBgn0002838_ms(3)K81	NA	NA	NA	NA	NA	NA	1	NA	NA	NA	NA	NA	NA	NA	NA	NA	NA	NA	NA	NA	NA	NA
431	FBgn0002842_sa	NA	NA	NA	NA	NA	NA	1	NA	NA	NA	NA	NA	NA	NA	NA	NA	NA	NA	NA	NA	NA	NA
432	FBgn0002855_Acp26Aa	NA	NA	NA	NA	NA	NA	1	NA	NA	NA	NA	NA	NA	NA	NA	NA	NA	NA	NA	NA	NA	NA
433	FBgn0002856_Acp26Ab	NA	NA	NA	NA	NA	NA	1	NA	NA	NA	NA	NA	NA	NA	NA	NA	NA	NA	NA	NA	NA	NA
434	FBgn0002862_Mst87F	0.454705	0.481739	0.637739	0.84199	1	0.968866	0.97371	0.454705	0.802729	0.618224	0.481739	1.02389	0.637739	0.863829	0.84199	1.09205	1	1.03e-14	2.72e-15	0.968866	-0.0390303	0.958837
435	FBgn0002863_Acp95EF	0.453725	0.125956	0.924485	0.195568	1	0.797412	0.55414	0.453725	0.804968	1.30911	0.125956	1.64675	0.924485	0.543314	0.195568	1.77799	1	0	3.79e-17	0.797412	0.256698	1.09794
436	FBgn0002865_Mst98Ca	0.639886	0.00198796	0.999481	0.00227027	1	0.8911	0.0118686	0.639886	0.451134	1.48245	0.00198796	3.63752	0.999481	0.238879	0.00227027	4.05117	1	0	1.71e-16	0.8911	0.136913	1.01592
437	FBgn0002868_MtnA	0.052777	0.00242871	0.977489	0.0072539	0.065902	0.00965698	0.0144841	0.052777	3.15242	0.219789	0.00242871	3.52803	0.977489	0.424379	0.0072539	3.38857	0.065902	2.89908	0.248803	0.00965698	2.58788	1.82904
438	FBgn0002869_MtnB	0.750569	0.159134	0.935136	0.21853	0.950135	0.607303	0.646523	0.750569	0.288847	0.1875	0.159134	1.54374	0.935136	0.525036	0.21853	1.72762	0.950135	0.0512126	0.078541	0.607303	0.513926	1.20669
439	FBgn0002872_mu2	0.506067	0.179611	0.896113	0.277788	0.59583	0.264782	0.695127	0.506067	0.691989	0.0678529	0.179611	1.49008	0.896113	0.586128	0.277788	1.61867	0.59583	0.524085	0.0586599	0.264782	1.11516	1.26934
440	FBgn0002873_mud	0.786817	0.975222	0.0767824	0.0975232	0.794316	0.501106	0.380809	0.786817	0.241102	0.163713	0.975222	0.432005	0.0767824	1.86416	0.0975232	2.09575	0.794316	0.231512	0.144088	0.501106	-0.672751	0.834089
441	FBgn0002878_mus101	0.205101	0.0828139	0.907442	0.158737	0.189	0.0661031	0.336572	0.205101	1.64408	0.216108	0.0828139	1.83089	0.907442	0.56986	0.158737	1.87277	0.189	1.73226	0.234958	0.0661031	1.83772	1.4663
442	FBgn0002887_mus201	0.560836	0.468783	0.682085	0.784327	0.375386	0.597216	0.940616	0.560836	0.586175	0.0643694	0.468783	1.03824	0.682085	0.820343	0.784327	1.12853	0.375386	1.00247	0.0692487	0.597216	0.528408	1.16928
443	FBgn0002891_mus205	0.962325	0.732708	0.502792	0.76645	0.689224	0.611813	0.984891	0.962325	0.0384372	0.0219495	0.732708	0.770326	0.502792	1.00105	0.76645	1.14023	0.689224	0.37543	0.0702685	0.611813	-0.507487	0.930028
444	FBgn0002899_mus301	0.46918	0.631896	0.493233	0.859596	0.443521	0.7192	0.970304	0.46918	0.770246	0.177533	0.631896	0.869574	0.493233	1.01135	0.859596	1.08127	0.443521	0.828577	0.134274	0.7192	-0.359528	0.88731
445	FBgn0002901_mus304	0.198698	0.616772	0.369121	0.743224	0.18599	0.780109	0.709076	0.198698	1.67825	0.125272	0.616772	0.884485	0.369121	1.15852	0.743224	1.15574	0.18599	1.74961	0.139226	0.780109	-0.279177	0.936055
446	FBgn0002905_mus308	0.779229	0.422369	0.767904	0.650363	0.463901	0.956031	0.962855	0.779229	0.250903	0.0528412	0.422369	1.09179	0.767904	0.734706	0.650363	1.22183	0.463901	0.78197	0.0829833	0.956031	0.0551345	1.06605
447	FBgn0002906_Blm	0.376741	0.416235	0.669476	0.742802	0.325549	0.838572	0.905876	0.376741	0.998699	0.0943754	0.416235	1.09916	0.669476	0.832704	0.742802	1.15603	0.325549	1.15205	0.0975411	0.838572	-0.203721	0.94168
448	FBgn0002909_mus312	0.478903	0.461611	0.66445	0.794688	0.387771	0.754536	0.94734	0.478903	0.749009	0.0656117	0.461611	1.04628	0.66445	0.837629	0.794688	1.12183	0.387771	0.968521	0.0661677	0.754536	0.312664	1.07717
449	FBgn0002914_Myb	0.383926	0.167585	0.882207	0.277673	0.537835	0.178157	0.66731	0.383926	0.978938	0.0813567	0.167585	1.52084	0.882207	0.604956	0.277673	1.61886	0.537835	0.629235	0.0718445	0.178157	1.34645	1.27125
450	FBgn0002917_na	0.701175	0.00217643	0.999526	0.00240491	0.910184	0.0011623	0.00695355	0.701175	0.357945	0.0439328	0.00217643	3.58778	0.999526	0.23603	0.00240491	4.01679	0.910184	0.0943144	0.020089	0.0011623	3.24797	2.19722
451	FBgn0002921_Atpalpha	0.00829373	0.473439	0.115097	0.505727	0.00601445	0.846734	0.0355484	0.00829373	5.36834	0.0759169	0.473439	1.03306	0.115097	1.68635	0.505727	1.34239	0.00601445	5.77292	0.0687751	0.846734	-0.193287	0.940369
452	FBgn0002922_nau	0.198819	0.273794	0.712076	0.546719	0.248423	0.78262	0.735525	0.198819	1.67759	0.331453	0.273794	1.2997	0.712076	0.790825	0.546719	1.30548	0.248423	1.43872	0.2825	0.78262	0.275907	1.09329
453	FBgn0002924_ncd	0.122212	0.135627	0.80046	0.302502	0.129708	0.310227	0.542557	0.122212	2.20818	0.408064	0.135627	1.61422	0.80046	0.700599	0.302502	1.57986	0.129708	2.14263	0.389359	0.310227	1.01475	1.28903
454	FBgn0002926_ndl	0.136672	0.493528	0.432619	0.93552	1	0.900494	0.585949	0.136672	2.08519	1.158	0.493528	1.01103	0.432619	1.07964	0.93552	1.03638	1	0	2.17e-16	0.900494	0.125038	1.11111
455	FBgn0002930_nec	0.778811	0.0890629	0.969869	0.114837	0.746732	0.509635	0.428613	0.778811	0.251445	0.093237	0.0890629	1.79892	0.969869	0.44834	0.114837	2.02059	0.746732	0.294042	0.0758523	0.509635	0.659406	1.20165
456	FBgn0002931_net	0.0881338	0.00509614	0.978426	0.0125619	0.0528362	0.129649	0.0301899	0.0881338	2.57141	0.224229	0.00509614	3.13764	0.978426	0.421076	0.0125619	3.09599	0.0528362	3.15114	0.213801	0.129649	1.51549	1.47494
457	FBgn0002932_neur	0.90007	0.95002	0.148049	0.191713	0.874735	0.0858204	0.416301	0.90007	0.105541	0.0361726	0.95002	0.49634	0.148049	1.57562	0.191713	1.78702	0.874735	0.134251	0.0473254	0.0858204	-1.71787	0.70125
458	FBgn0002933_ng1	NA	NA	NA	NA	NA	NA	1	NA	NA	NA	NA	NA	NA	NA	NA	NA	NA	NA	NA	NA	NA	NA
459	FBgn0002936_ninaA	0.63633	0.0797652	0.967406	0.108518	0.567011	0.0208538	0.118778	0.63633	0.456823	0.15735	0.0797652	1.84739	0.967406	0.455221	0.108518	2.04657	0.567011	0.574929	0.164772	0.0208538	2.31062	1.49049
460	FBgn0002937_ninaB	0.0542053	0.194822	0.617434	0.525689	0.0225324	0.458163	0.127804	0.0542053	3.12182	0.153294	0.194822	1.45386	0.617434	0.883831	0.525689	1.3241	0.0225324	4.14791	0.157848	0.458163	0.741876	1.15466
461	FBgn0002938_ninaC	0.127878	0.102839	0.845459	0.226411	0.188167	0.176014	0.478539	0.127878	2.15826	0.108092	0.102839	1.73578	0.845459	0.650388	0.226411	1.71155	0.188167	1.73703	0.0942895	0.176014	1.35313	1.35969
462	FBgn0002939_ninaD	0.461825	0.873147	0.201354	0.32199	0.494327	0.112651	0.511835	0.461825	0.786617	0.0975947	0.873147	0.616669	0.201354	1.43912	0.32199	1.55136	0.494327	0.716229	0.0911354	0.112651	-1.58639	0.756591
463	FBgn0002940_ninaE	0.625563	0.847169	0.279217	0.426913	0.676963	0.519258	0.859775	0.625563	0.474259	0.0715906	0.847169	0.648382	0.279217	1.29064	0.426913	1.4216	0.676963	0.393701	0.07452	0.519258	-0.644489	0.845831
464	FBgn0002941_slou	0.451298	0.0221083	0.988357	0.0313716	0.40019	0.0239082	0.125531	0.451298	0.810532	0.188789	0.0221083	2.42428	0.988357	0.377754	0.0313716	2.63362	0.40019	0.935602	0.218156	0.0239082	2.2586	1.63297
465	FBgn0002945_nkd	0.946339	0.0952616	0.973423	0.116397	0.624635	0.230191	0.451549	0.946339	0.0552247	0.0271476	0.0952616	1.76938	0.973423	0.437735	0.116397	2.0144	0.624635	0.475775	0.0840248	0.230191	1.19987	1.62861
466	FBgn0002948_nod	0.986819	0.6597	0.589856	0.928981	0.935907	0.784955	0.99524	0.986819	0.0132727	0.0230274	0.6597	0.842284	0.589856	0.911233	0.928981	1.04015	0.935907	0.0663416	0.049119	0.784955	0.272868	1.05174
467	FBgn0002962_nos	0.636282	0.99899	0.00365265	0.00426577	1	0.484026	0.0217168	0.636282	0.456901	1.04052	0.99899	0.26118	0.00365265	3.31027	0.00426577	3.68364	1	0	1.76e-16	0.484026	-0.699842	0.390669
468	FBgn0002973_numb	0.98485	0.337396	0.855132	0.475034	0.99616	0.304655	0.886968	0.98485	0.0152717	0.0170293	0.337396	1.20181	0.855132	0.638919	0.475034	1.37181	0.99616	0.00384732	0.00936307	0.304655	1.0265	1.1721
469	FBgn0002985_odd	0.136778	0.129834	0.819641	0.281019	0.0860084	0.286586	0.417021	0.136778	2.08434	0.270124	0.129834	1.63342	0.819641	0.679735	0.281019	1.61341	0.0860084	2.59876	0.33722	0.286586	1.06564	1.37648
470	FBgn0002989_okr	0.71127	0.530166	0.663261	0.865336	0.321122	0.895441	0.902107	0.71127	0.343417	0.0521918	0.530166	0.972102	0.663261	0.838794	0.865336	1.07779	0.321122	1.16648	0.08854	0.895441	0.131423	1.05778
471	FBgn0003002_opa	0.956849	0.0786528	0.979558	0.0941563	0.786371	0.278972	0.388298	0.956849	0.0441553	0.0406121	0.0786528	1.85357	0.979558	0.416953	0.0941563	2.11197	0.786371	0.241675	0.10406	0.278972	1.08263	1.274
472	FBgn0003008_or	0.156983	0.666718	0.285299	0.600781	0.176026	0.76711	0.641064	0.156983	1.93369	0.0978665	0.666718	0.835407	0.285299	1.28066	0.600781	1.26032	0.176026	1.80923	0.101292	0.76711	-0.296158	0.866896
473	FBgn0003009_ord	0.491481	0.148198	0.914943	0.227591	1	0.3789	0.618028	0.491481	0.722196	1.50223	0.148198	1.57517	0.914943	0.558525	0.227591	1.70919	1	0	1.94e-17	0.3789	0.879925	1.4212
474	FBgn0003011_ort	0.762464	0.413192	0.772165	0.636873	0.568182	0.815812	0.959171	0.762464	0.272918	0.0369299	0.413192	1.10284	0.772165	0.730318	0.636873	1.23205	0.568182	0.572811	0.0460925	0.815812	0.232935	1.06245
475	FBgn0003015_osk	0.981277	0.97916	0.0816389	0.0972797	1	0.622529	0.400097	0.981277	0.018909	0.179185	0.97916	0.418418	0.0816389	1.83718	0.0972797	2.09691	1	0	1.66e-15	0.622529	0.492269	1.82578
476	FBgn0003016_osp	0.454653	0.803377	0.290691	0.481631	0.562972	0.330765	0.872646	0.454653	0.802847	0.0645511	0.803377	0.697469	0.290691	1.27196	0.481631	1.36534	0.562972	0.582271	0.0557629	0.330765	-0.972573	0.805037
477	FBgn0003023_otu	0.217712	0.928723	0.0655584	0.122669	0.5453	0.960836	0.334247	0.217712	1.57994	0.58292	0.928723	0.536225	0.0655584	1.93384	0.122669	1.99036	0.5453	0.615052	0.346462	0.960836	0.0491044	1.0005
478	FBgn0003028_ovo	0.977879	0.901695	0.256402	0.346948	0.990445	0.435547	0.830944	0.977879	0.0223811	0.0176554	0.901695	0.57823	0.256402	1.32985	0.346948	1.5172	0.990445	0.00960352	0.0099615	0.435547	-0.779734	0.780351
479	FBgn0003034_SP	NA	NA	NA	NA	NA	NA	1	NA	NA	NA	NA	NA	NA	NA	NA	NA	NA	NA	NA	NA	NA	NA
480	FBgn0003041_pbl	0.92999	0.316697	0.862307	0.447501	0.96004	0.746089	0.898216	0.92999	0.0727039	0.022534	0.316697	1.23184	0.862307	0.630207	0.447501	1.3997	0.96004	0.0408189	0.0172722	0.746089	0.323801	1.09106
481	FBgn0003042_Pc	0.162746	0.163873	0.800371	0.339763	0.100335	0.489806	0.469744	0.162746	1.89443	0.0802094	0.163873	1.53075	0.800371	0.700694	0.339763	1.52679	0.100335	2.42669	0.0880388	0.489806	0.690617	1.18473
482	FBgn0003044_Pcl	0.860368	0.131292	0.955406	0.170148	0.831091	0.0648244	0.331103	0.860368	0.150922	0.0266758	0.131292	1.62851	0.955406	0.484709	0.170148	1.84121	0.831091	0.185815	0.0321399	0.0648244	1.84647	1.25447
483	FBgn0003046_Pcp	0.691128	0.186429	0.914948	0.266061	0.650049	0.979722	0.710016	0.691128	0.372622	0.319874	0.186429	1.47351	0.914948	0.558517	0.266061	1.63828	0.650049	0.43505	0.328756	0.979722	0.0254177	1.02712
484	FBgn0003048_pcx	0.645884	0.284462	0.846812	0.432509	0.535426	0.21998	0.774765	0.645884	0.441609	0.054369	0.284462	1.28202	0.846812	0.648802	0.432509	1.41555	0.535426	0.633856	0.061465	0.21998	1.22658	1.23783
485	FBgn0003053_peb	0.217083	0.320749	0.678053	0.631344	0.260991	0.532697	0.7697	0.217083	1.58304	0.116311	0.320749	1.22584	0.678053	0.824297	0.631344	1.2363	0.260991	1.38612	0.0999745	0.532697	0.623895	1.19647
486	FBgn0003057_CG10598	NA	NA	NA	NA	NA	NA	1	NA	NA	NA	NA	NA	NA	NA	NA	NA	NA	NA	NA	NA	NA	NA
487	FBgn0003060_CG9757	0.0376002	0.766534	0.0708697	0.221219	0.109854	0.227735	0.205428	0.0376002	3.54429	0.5255	0.766534	0.736113	0.0708697	1.89946	0.221219	1.72208	0.109854	2.32603	0.313976	0.227735	-1.20621	0.746595
488	FBgn0003062_Fib	0.171955	0.0087846	0.984257	0.0170719	0.206668	0.115535	0.0515635	0.171955	1.83461	0.2678	0.0087846	2.86449	0.984257	0.397932	0.0170719	2.9377	0.206668	1.63589	0.216142	0.115535	1.57379	1.65227
489	FBgn0003065_CG2150	0.344577	0.0234179	0.982919	0.0365356	0.073757	0.296786	0.132534	0.344577	1.09228	0.38111	0.0234179	2.39766	0.982919	0.403705	0.0365356	2.55936	0.073757	2.77162	0.505528	0.296786	1.04335	1.17289
490	FBgn0003067_Pepck	0.951794	0.101704	0.971224	0.124806	0.948205	0.11628	0.474566	0.951794	0.0494631	0.0506689	0.101704	1.74065	0.971224	0.4444	0.124806	1.98246	0.948205	0.0532504	0.0605875	0.11628	1.57058	1.56813
491	FBgn0003068_per	0.078865	0.289549	0.558636	0.704984	0.1073	0.339628	0.389143	0.078865	2.69614	0.248381	0.289549	1.27379	0.558636	0.942744	0.704984	1.18212	0.1073	2.35211	0.235841	0.339628	0.9549	1.10644
492	FBgn0003071_Pfk	0.592465	0.0167836	0.993986	0.0213926	0.65203	0.013704	0.0794579	0.592465	0.529887	0.0593421	0.0167836	2.553	0.993986	0.339104	0.0213926	2.82348	0.65203	0.431947	0.0564548	0.013704	2.46493	1.68871
493	FBgn0003074_Pgi	0.0469438	0.00122118	0.983051	0.00383115	0.0368524	0.111243	0.00730475	0.0469438	3.28709	0.229155	0.00122118	3.91155	0.983051	0.40315	0.00383115	3.74491	0.0368524	3.5677	0.219772	0.111243	1.59263	1.6972
494	FBgn0003076_Pgm	0.461499	0.0227087	0.988357	0.0320125	0.518183	0.0139014	0.0805631	0.461499	0.787349	0.145123	0.0227087	2.41188	0.988357	0.377751	0.0320125	2.62373	0.518183	0.667582	0.155722	0.0139014	2.4598	1.58533
495	FBgn0003079_Raf	0.298365	0.164378	0.862449	0.29097	0.508516	0.150312	0.623679	0.298365	1.2441	0.0980169	0.164378	1.52939	0.862449	0.630033	0.29097	1.59757	0.508516	0.687006	0.0673984	0.150312	1.43843	1.36455
496	FBgn0003082_phr	0.670103	0.133474	0.942373	0.186212	0.706666	0.0390337	0.212503	0.670103	0.404074	0.11486	0.133474	1.62126	0.942373	0.511626	0.186212	1.80024	0.706666	0.350015	0.103406	0.0390337	2.06383	1.34014
497	FBgn0003086_Pig1	0.775812	0.636702	0.573325	0.935818	1	0.0406188	0.220264	0.775812	0.255349	1.01006	0.636702	0.864847	0.573325	0.927841	0.935818	1.03621	1	0	2.05e-16	0.0406188	2.0474	3.25279
498	FBgn0003087_pim	0.107706	0.139784	0.78086	0.322214	0.0709737	0.220052	0.357063	0.107706	2.34792	0.373937	0.139784	1.60093	0.78086	0.721297	0.322214	1.55105	0.0709737	2.81509	0.37316	0.220052	1.22639	1.31861
499	FBgn0003089_pip	0.785338	0.156708	0.938919	0.212158	0.533341	0.269465	0.640359	0.785338	0.243004	0.130583	0.156708	1.55053	0.938919	0.51814	0.212158	1.74105	0.533341	0.637873	0.169867	0.269465	1.1043	1.22894
500	FBgn0003090_pk	0.123878	0.039392	0.927605	0.0870535	0.143155	0.349297	0.214263	0.123878	2.19326	0.15	0.039392	2.16074	0.927605	0.538117	0.0870535	2.14826	0.143155	2.0344	0.151902	0.349297	0.935955	1.34453
501	FBgn0003091_Pkc53E	0.0789702	0.0372231	0.902848	0.0947798	0.0542714	0.112904	0.203559	0.0789702	2.69464	0.103585	0.0372231	2.18625	0.902848	0.57657	0.0947798	2.10892	0.0542714	3.12043	0.106695	0.112904	1.58528	1.49038
502	FBgn0003093_Pkc98E	0.713955	0.144295	0.940061	0.199089	0.763312	0.194667	0.607406	0.713955	0.33959	0.0518833	0.144295	1.58694	0.940061	0.516009	0.199089	1.76989	0.763312	0.271792	0.0411603	0.194667	1.2969	1.18202
503	FBgn0003114_plu	NA	NA	NA	NA	NA	NA	1	NA	NA	NA	NA	NA	NA	NA	NA	NA	NA	NA	NA	NA	NA	NA
504	FBgn0003116_pn	0.38886	1.88e-06	0.999996	2.35e-06	0.223166	0.00111888	1.13e-05	0.38886	0.965592	0.0795328	1.88e-06	8.93541	0.999996	0.133264	2.35e-06	9.73	0.223166	1.55339	0.0651887	0.00111888	3.25879	3.32503
505	FBgn0003117_pnr	0.707693	0.538755	0.654546	0.882845	0.914826	0.992506	0.990371	0.707693	0.34854	0.088761	0.538755	0.963172	0.654546	0.847336	0.882845	1.06726	0.914826	0.0892064	0.0424221	0.992506	0.00939282	1.0079
506	FBgn0003118_pnt	0.158844	0.0585493	0.917257	0.120292	0.116895	0.286127	0.303717	0.158844	1.92085	0.0740367	0.0585493	1.98387	0.917257	0.554924	0.120292	1.99932	0.116895	2.25728	0.0707419	0.286127	1.06666	1.48741
507	FBgn0003124_polo	0.49348	0.967429	0.0633772	0.0919546	0.511076	0.803706	0.324869	0.49348	0.718002	0.509662	0.967429	0.455156	0.0633772	1.9488	0.0919546	2.12291	0.511076	0.681825	0.301878	0.803706	-0.248553	0.896355
508	FBgn0003129_Poxm	0.424587	0.035318	0.979577	0.0522155	0.614724	0.168313	0.194056	0.424587	0.873934	0.371757	0.035318	2.20997	0.979577	0.416882	0.0522155	2.38797	0.614724	0.49213	0.24261	0.168313	1.37765	1.4933
509	FBgn0003130_Poxn	0.237106	0.489617	0.52508	0.963465	0.321702	0.971843	0.802855	0.237106	1.48851	0.292801	0.489617	1.01528	0.52508	0.977421	0.963465	1.02044	0.321702	1.16458	0.255659	0.971843	0.0352973	1.01036
510	FBgn0003132_Pp1-13C	0.786583	0.285804	0.865486	0.414456	0.433085	0.373268	0.86729	0.786583	0.241402	0.291721	0.285804	1.27984	0.865486	0.626286	0.414456	1.43533	0.433085	0.853319	0.438521	0.373268	0.890368	1.21162
511	FBgn0003134_Pp1alpha-96A	0.599734	0.307987	0.822028	0.481086	0.543374	0.393461	0.890179	0.599734	0.517396	0.0379714	0.307987	1.24496	0.822028	0.677088	0.481086	1.36588	0.543374	0.618691	0.0424492	0.393461	0.853358	1.15943
512	FBgn0003137_Ppn	0.88481	0.00686351	0.998886	0.00725355	0.966711	0.0415508	0.0404809	0.88481	0.122731	0.0305661	0.00686351	2.98694	0.998886	0.264688	0.00725355	3.38859	0.966711	0.0338821	0.0170549	0.0415508	2.03799	1.69735
513	FBgn0003139_PpV	0.644025	0.239487	0.876751	0.357385	0.895875	0.196585	0.73107	0.644025	0.444552	0.037757	0.239487	1.36096	0.876751	0.612057	0.357385	1.50361	0.895875	0.110236	0.0244822	0.196585	1.29134	1.44322
514	FBgn0003140_PpY-55A	0.380673	0.0932391	0.936835	0.149623	1	0.318382	0.444151	0.380673	0.987835	2.42715	0.0932391	1.7788	0.936835	0.521968	0.149623	1.89968	1	0	6.63e-17	0.318382	-0.997789	0.751882
515	FBgn0003141_pr	0.12094	0.546515	0.362075	0.803443	0.135342	0.994171	0.538563	0.12094	2.21973	0.102037	0.546515	0.95516	0.362075	1.16787	0.803443	1.11623	0.135342	2.09592	0.0996059	0.994171	-0.00730599	0.978956
516	FBgn0003145_prd	0.860388	0.68808	0.535386	0.845171	1	0.0374143	0.204507	0.860388	0.150898	0.629916	0.68808	0.814459	0.535386	0.966666	0.845171	1.09009	1	0	4.69e-17	0.0374143	-2.08121	0.220702
517	FBgn0003149_Prm	0.0433637	0.153265	0.643655	0.44219	0.0918326	0.56217	0.233555	0.0433637	3.37871	0.0837621	0.153265	1.56034	0.643655	0.858018	0.44219	1.40526	0.0918326	2.52543	0.0781882	0.56217	0.579621	1.18643
518	FBgn0003159_CG2841	0.52171	0.751721	0.375737	0.619949	0.336562	0.870398	0.914729	0.52171	0.660588	0.0550137	0.751721	0.75121	0.375737	1.14985	0.619949	1.24514	0.336562	1.11702	0.0731995	0.870398	-0.163153	0.912958
519	FBgn0003162_Pu	0.357249	0.201696	0.848597	0.344652	0.524867	0.486884	0.741173	0.357249	1.05436	0.196099	0.201696	1.43836	0.848597	0.6467	0.344652	1.52025	0.524867	0.654372	0.125538	0.486884	0.695274	1.18396
520	FBgn0003165_pum	0.990578	0.520942	0.721768	0.795849	0.982793	0.98914	0.987913	0.990578	0.00946918	0.0124371	0.520942	0.981768	0.721768	0.781222	0.795849	1.12109	0.982793	0.0173635	0.0164018	0.98914	0.0136116	1.0081
521	FBgn0003169_put	0.780607	0.0379193	0.989446	0.0459356	0.605344	0.0640055	0.207008	0.780607	0.249115	0.0249161	0.0379193	2.1779	0.989446	0.371558	0.0459356	2.44906	0.605344	0.507864	0.0308169	0.0640055	1.85214	1.51213
522	FBgn0003174_pwn	0.267898	0.247909	0.776166	0.460224	0.434649	0.359741	0.819023	0.267898	1.35833	0.185463	0.247909	1.34523	0.776166	0.726178	0.460224	1.38662	0.434649	0.849571	0.152011	0.359741	0.915859	1.18261
523	FBgn0003175_px	0.212786	0.19134	0.802532	0.371928	0.14708	0.262271	0.615011	0.212786	1.60452	0.0590066	0.19134	1.46191	0.802532	0.698377	0.371928	1.48529	0.14708	2.00482	0.0584085	0.262271	1.12104	1.41262
524	FBgn0003187_qua	0.346074	0.16607	0.87444	0.282746	0.268881	0.216667	0.66366	0.346074	1.08772	0.15362	0.16607	1.52486	0.87444	0.615022	0.282746	1.61062	0.268881	1.35444	0.158851	0.216667	1.23544	1.27541
525	FBgn0003189_r	0.739907	0.369295	0.801531	0.563075	0.738677	0.719719	0.937056	0.739907	0.303351	0.113951	0.369295	1.15829	0.801531	0.699451	0.563075	1.29143	0.738677	0.305039	0.107834	0.719719	0.358834	1.0677
526	FBgn0003204_ras	0.158084	0.0545883	0.921767	0.1122	0.213506	0.0735336	0.285954	0.158084	1.92607	0.0986206	0.0545883	2.01495	0.921767	0.547747	0.1122	2.03125	0.213506	1.60089	0.0946027	0.0735336	1.7895	1.3748
527	FBgn0003205_Ras85D	0.532658	0.50397	0.641936	0.860445	0.755224	0.463192	0.976072	0.532658	0.639193	0.0728326	0.50397	0.999786	0.641936	0.859705	0.860445	1.08075	0.755224	0.282581	0.0448022	0.463192	-0.733601	0.925261
528	FBgn0003206_Ras64B	0.398245	0.357055	0.730736	0.621101	0.495491	0.882488	0.929361	0.398245	0.940685	0.0619568	0.357055	1.17463	0.730736	0.772295	0.621101	1.24424	0.495491	0.713799	0.0578899	0.882488	0.147816	1.05925
529	FBgn0003209_raw	0.871766	0.00130216	0.999838	0.00129764	0.810088	0.00228502	0.0077606	0.871766	0.137673	0.0326606	0.00130216	3.87481	0.999838	0.206022	0.00129764	4.39382	0.810088	0.211647	0.0492801	0.00228502	3.05045	2.0823
530	FBgn0003210_rb	0.666871	0.0516505	0.981459	0.0672254	0.530046	0.0296503	0.165225	0.666871	0.409	0.0528369	0.0516505	2.03954	0.981459	0.409661	0.0672254	2.26873	0.530046	0.644255	0.0594982	0.0296503	2.17473	1.38174
531	FBgn0003218_rdgB	0.833217	0.980817	0.0658967	0.0812282	0.898974	0.0383024	0.208901	0.833217	0.183237	0.0406896	0.980817	0.41218	0.0658967	1.93157	0.0812282	2.1804	0.898974	0.106765	0.0384888	0.0383024	-2.0716	0.654803
532	FBgn0003227_rec	0.0602006	0.0647057	0.828998	0.177262	0.042771	0.253756	0.230701	0.0602006	3.00198	0.40668	0.0647057	1.93963	0.828998	0.669288	0.177262	1.82261	0.042771	3.39464	0.399454	0.253756	1.14127	1.29521
533	FBgn0003231_ref(2)P	0.626591	0.125912	0.942948	0.178208	0.830665	0.237304	0.554004	0.626591	0.47258	0.0537027	0.125912	1.6469	0.942948	0.510519	0.178208	1.82019	0.830665	0.186332	0.032598	0.237304	1.18175	1.39016
534	FBgn0003248_Rh2	0.716005	0.0880907	0.967518	0.116442	0.602081	0.133487	0.424944	0.716005	0.336676	0.0683903	0.0880907	1.80374	0.967518	0.454915	0.116442	2.01422	0.602081	0.513398	0.0766755	0.133487	1.50049	1.31865
535	FBgn0003249_Rh3	0.787309	0.0957351	0.967398	0.123773	0.858361	0.0305856	0.170041	0.787309	0.240469	0.0586303	0.0957351	1.7672	0.967398	0.455241	0.123773	1.98626	0.858361	0.153274	0.0448249	0.0305856	2.16242	1.44462
536	FBgn0003250_Rh4	0.81163	0.0764309	0.976204	0.096105	0.793001	0.0238424	0.134794	0.81163	0.209727	0.0893876	0.0764309	1.86618	0.976204	0.428764	0.096105	2.10251	0.793001	0.233186	0.0940087	0.0238424	2.25966	1.36305
537	FBgn0003254_rib	0.497195	0.0883109	0.953214	0.130429	0.427029	0.678762	0.425777	0.497195	0.710252	0.220154	0.0883109	1.80265	0.953214	0.489539	0.130429	1.96231	0.427029	0.867966	0.230548	0.678762	0.414153	1.30937
538	FBgn0003255_rk	0.116534	0.00881227	0.975992	0.0196811	0.0936001	0.0219607	0.0517224	0.116534	2.2607	0.156603	0.00881227	2.86295	0.975992	0.429472	0.0196811	2.86549	0.0936001	2.50414	0.158426	0.0219607	2.29105	1.7188
539	FBgn0003256_rl	0.943454	0.210373	0.923102	0.279934	0.847885	0.166108	0.663753	0.943454	0.0582868	0.0485145	0.210373	1.41948	0.923102	0.54558	0.279934	1.61517	0.847885	0.165645	0.0852024	0.166108	1.38482	1.31385
540	FBgn0003257_r-l	0.154595	0.0816275	0.887793	0.169893	0.121757	0.290657	0.400053	0.154595	1.9504	0.13821	0.0816275	1.83724	0.887793	0.597527	0.169893	1.84189	0.121757	2.2123	0.16218	0.290657	1.05668	1.42297
541	FBgn0003261_Rm62	0.0116183	0.00137744	0.938075	0.00733298	0.00437783	0.030472	0.00823625	0.0116183	4.95038	0.123054	0.00137744	3.84281	0.938075	0.519699	0.00733298	3.38267	0.00437783	6.17881	0.125897	0.030472	2.1639	1.79171
542	FBgn0003267_ro	0.68321	0.119436	0.950611	0.164121	1	0.401009	0.533807	0.68321	0.384348	0.692933	0.119436	1.6701	0.950611	0.4951	0.164121	1.8576	1	0	1.89e-16	0.401009	-0.839821	0.484365
543	FBgn0003268_rod	0.46774	0.63586	0.4885	0.850786	0.429851	0.962223	0.96565	0.46774	0.77343	0.100794	0.63586	0.865674	0.4885	1.0165	0.850786	1.08665	0.429851	0.861114	0.10474	0.962223	0.0473641	1.02659
544	FBgn0003270_amos	0.958999	0.220552	0.919057	0.293961	1	0.00882677	0.0518056	0.958999	0.0419061	0.376129	0.220552	1.39822	0.919057	0.552085	0.293961	1.59291	1	0	9.81e-18	0.00882677	2.61869	8.32044
545	FBgn0003274_RpLP2	0.29814	0.000915515	0.998926	0.00138801	0.244534	0.0190984	0.00548053	0.29814	1.2449	0.122105	0.000915515	4.07888	0.998926	0.263378	0.00138801	4.3517	0.244534	1.45555	0.120824	0.0190984	2.3436	2.05331
546	FBgn0003275_RpII18	0.56541	0.0114231	0.995769	0.0145595	0.6029	0.0523639	0.0666106	0.56541	0.577833	0.137182	0.0114231	2.7365	0.995769	0.321097	0.0145595	3.0194	0.6029	0.512006	0.125099	0.0523639	1.94013	1.56978
547	FBgn0003277_RpII215	0.837421	0.011474	0.997731	0.012681	0.885624	0.0147478	0.0668992	0.837421	0.178163	0.0486811	0.011474	2.73435	0.997731	0.29267	0.012681	3.09107	0.885624	0.121807	0.0371852	0.0147478	2.43851	1.76141
548	FBgn0003278_RpI135	0.667188	0.505037	0.676133	0.826966	0.300279	0.850743	0.882632	0.667188	0.408516	0.0743313	0.505037	0.998644	0.676133	0.826179	0.826966	1.10138	0.300279	1.23734	0.119631	0.850743	0.188171	1.06169
549	FBgn0003279_RpL4	0.700835	0.0264101	0.992055	0.0324802	0.860333	0.059791	0.148359	0.700835	0.358438	0.120963	0.0264101	2.34231	0.992055	0.354561	0.0324802	2.61664	0.860333	0.150963	0.0691343	0.059791	1.88233	1.62998
550	FBgn0003285_rst	0.439674	0.302175	0.790093	0.506381	0.364843	0.543146	0.884527	0.439674	0.837628	0.0892573	0.302175	1.25389	0.790093	0.711615	0.506381	1.34178	0.364843	1.0323	0.0882972	0.543146	0.608063	1.14231
551	FBgn0003292_rt	0.389914	0.275406	0.797636	0.470919	0.414133	0.406643	0.855267	0.389914	0.962763	0.106264	0.275406	1.29699	0.797636	0.703616	0.470919	1.37588	0.414133	0.899892	0.099499	0.406643	0.829816	1.12705
552	FBgn0003295_ru	0.712586	0.367969	0.797936	0.565481	0.614303	0.416501	0.936257	0.712586	0.341539	0.0603361	0.367969	1.16004	0.797936	0.703296	0.565481	1.28939	0.614303	0.492831	0.0888764	0.416501	0.812507	1.13736
553	FBgn0003300_run	0.0234687	0.0072215	0.917067	0.0284021	0.0316194	0.223715	0.0425542	0.0234687	4.09939	0.408488	0.0072215	2.96153	0.917067	0.555222	0.0284021	2.68247	0.0316194	3.7469	0.331649	0.223715	1.21671	1.49049
554	FBgn0003301_rut	0.0060699	0.0228046	0.702481	0.130859	0.00532355	0.177929	0.0315192	0.0060699	5.76128	0.10301	0.0228046	2.40993	0.702481	0.800295	0.130859	1.96081	0.00532355	5.92815	0.110895	0.177929	1.34716	1.28035
555	FBgn0003302_rux	0.938974	0.0432132	0.990293	0.0496526	0.970773	0.0203595	0.116105	0.938974	0.0630601	0.0455632	0.0432132	2.11918	0.990293	0.366413	0.0496526	2.41191	0.970773	0.0296833	0.0217871	0.0203595	2.31966	1.63855
556	FBgn0003308_ry	0.635412	0.0450593	0.983259	0.0590727	0.746232	0.0341276	0.18807	0.635412	0.458297	0.106008	0.0450593	2.10045	0.983259	0.402269	0.0590727	2.32954	0.746232	0.29472	0.0864984	0.0341276	2.11856	1.60175
557	FBgn0003310_S	0.665552	0.153363	0.931205	0.217045	0.752305	0.338843	0.631715	0.665552	0.411017	0.0456179	0.153363	1.56006	0.931205	0.531963	0.217045	1.73072	0.752305	0.286506	0.0421481	0.338843	0.956455	1.3102
558	FBgn0003312_sad	0.606653	0.585403	0.584474	0.999061	0.686248	0.488534	0.982098	0.606653	0.505653	0.346479	0.585403	0.915692	0.584474	0.916623	0.999061	1.00052	0.686248	0.379833	0.305108	0.488534	-0.692643	0.928978
559	FBgn0003313_sala	0.563173	0.295998	0.823837	0.467157	1	0.28218	0.863197	0.563173	0.581904	1.56363	0.295998	1.26354	0.823837	0.675073	0.467157	1.37964	1	0	2.14e-16	0.28218	1.07544	1.51811
560	FBgn0003317_sax	0.346449	0.00670577	0.994924	0.0100385	0.380438	0.0233166	0.0395661	0.346449	1.08659	0.0705971	0.00670577	2.99859	0.994924	0.330228	0.0100385	3.21399	0.380438	0.988482	0.0736106	0.0233166	2.26821	1.76336
561	FBgn0003319_Sb	0.895181	0.310802	0.862243	0.441957	0.94042	0.869249	0.892832	0.895181	0.111015	0.142544	0.310802	1.24068	0.862243	0.630285	0.441957	1.4055	0.94042	0.0615167	0.102789	0.869249	0.164613	1.01987
562	FBgn0003321_sbr	0.148767	0.0889783	0.87596	0.187471	0.0723823	0.289251	0.362891	0.148767	1.99235	0.0760747	0.0889783	1.79934	0.87596	0.613075	0.187471	1.79718	0.0723823	2.79287	0.0842461	0.289251	1.05977	1.24781
563	FBgn0003326_sca	0.145654	0.000143643	0.999052	0.000285045	0.0957798	0.00914677	0.000861547	0.145654	2.01547	0.13033	0.000143643	5.25996	0.999052	0.258909	0.000285045	5.41045	0.0957798	2.47845	0.12484	0.00914677	2.60652	2.15072
564	FBgn0003328_scb	0.931019	0.636884	0.603848	0.966448	0.868802	0.842729	0.996135	0.931019	0.0715946	0.0193756	0.636884	0.864668	0.603848	0.89729	0.966448	1.01875	0.868802	0.141101	0.0308482	0.842729	0.198404	1.0505
565	FBgn0003330_Sce	0.176543	0.147992	0.826263	0.299865	0.100938	0.301625	0.471872	0.176543	1.80605	0.165816	0.147992	1.57579	0.826263	0.672361	0.299865	1.58385	0.100938	2.42002	0.204634	0.301625	1.03296	1.23541
566	FBgn0003334_Scm	0.60765	0.00385062	0.998835	0.00458542	0.487917	0.00645729	0.0228825	0.60765	0.503972	0.0360955	0.00385062	3.28262	0.998835	0.266345	0.00458542	3.64273	0.487917	0.72972	0.0463378	0.00645729	2.72361	1.82726
567	FBgn0003339_Scr	0.82457	0.527421	0.688645	0.836629	0.865343	0.77707	0.988861	0.82457	0.193762	0.0571068	0.527421	0.974969	0.688645	0.813904	0.836629	1.09537	0.865343	0.145116	0.0606454	0.77707	0.283139	1.08023
568	FBgn0003345_sd	0.299005	0.273952	0.766208	0.498292	0.158883	0.665815	0.645889	0.299005	1.24184	0.0734634	0.273952	1.29943	0.766208	0.736447	0.498292	1.34937	0.158883	1.92058	0.0989657	0.665815	0.431899	1.16708
569	FBgn0003346_RanGAP	0.785429	0.612304	0.600444	0.987987	0.810088	0.705104	0.995931	0.785429	0.242887	0.0439303	0.612304	0.888905	0.600444	0.900674	0.987987	1.00667	0.810088	0.211647	0.0482784	0.705104	-0.37844	0.920811
570	FBgn0003353_sei	0.500242	0.0424001	0.979363	0.059916	0.327455	0.173766	0.228911	0.500242	0.703942	0.055489	0.0424001	2.12769	0.979363	0.417674	0.059916	2.32285	0.327455	1.1459	0.0539919	0.173766	1.3602	1.43729
571	FBgn0003356_Jon99Cii	0.441107	0.00641646	0.996606	0.0087713	1	0.0417417	0.0378865	0.441107	0.834246	2.06187	0.00641646	3.02074	0.996606	0.310568	0.0087713	3.28597	1	0	9.89e-17	0.0417417	2.03609	3.16281
572	FBgn0003357_Jon99Ciii	0.138128	0.77076	0.173221	0.374624	0.0418598	0.654706	0.226297	0.138128	2.07357	1.08197	0.77076	0.731767	0.173221	1.50617	0.374624	1.48196	0.0418598	3.41959	0.956565	0.654706	-0.447234	0.866744
573	FBgn0003358_Jon99Ci	0.154695	0.0690642	0.902803	0.143379	0.164836	0.452623	0.349094	0.154695	1.9497	0.898193	0.0690642	1.91084	0.902803	0.576636	0.143379	1.91911	0.164836	1.88055	0.744632	0.452623	0.751049	1.39443
574	FBgn0003360_sesB	0.0011765	0.0169188	0.535648	0.163408	0.00217276	0.183868	0.00703828	0.0011765	7.92321	0.107989	0.0169188	2.54922	0.535648	0.966394	0.163408	1.85958	0.00217276	7.09554	0.111437	0.183868	1.32894	1.33564
575	FBgn0003366_sev	0.837421	0.338368	0.837518	0.495055	0.770272	0.61992	0.916112	0.837421	0.178162	0.0738561	0.338368	1.20043	0.837518	0.659595	0.495055	1.35243	0.770272	0.262602	0.102618	0.61992	0.495964	1.12333
576	FBgn0003371_sgg	0.682457	0.078963	0.970076	0.105052	0.773213	0.121907	0.389532	0.682457	0.38547	0.0477964	0.078963	1.85184	0.970076	0.447747	0.105052	2.06149	0.773213	0.258746	0.036521	0.121907	1.54682	1.33773
577	FBgn0003372_Sgs1	0.1092	0.0838461	0.855421	0.192929	0.0961792	0.282013	0.408696	0.1092	2.33265	0.267508	0.0838461	1.82545	0.855421	0.638571	0.192929	1.78416	0.0961792	2.47381	0.272015	0.282013	1.07581	1.43584
578	FBgn0003373_Sgs3	NA	NA	NA	NA	NA	NA	1	NA	NA	NA	NA	NA	NA	NA	NA	NA	NA	NA	NA	NA	NA	NA
579	FBgn0003374_Sgs4	0.805804	0.00453433	0.999182	0.0048773	1	0.196339	0.0268995	0.805804	0.217002	0.606988	0.00453433	3.19769	0.999182	0.253796	0.0048773	3.60799	1	0	1.29e-15	0.196339	-1.29205	2.88e-16
580	FBgn0003375_Sgs5	NA	NA	NA	NA	NA	NA	1	NA	NA	NA	NA	NA	NA	NA	NA	NA	NA	NA	NA	NA	NA	NA
581	FBgn0003377_Sgs7	NA	NA	NA	NA	NA	NA	1	NA	NA	NA	NA	NA	NA	NA	NA	NA	NA	NA	NA	NA	NA	NA
582	FBgn0003378_Sgs8	NA	NA	NA	NA	NA	NA	1	NA	NA	NA	NA	NA	NA	NA	NA	NA	NA	NA	NA	NA	NA	NA
583	FBgn0003380_Sh	0.853311	0.0622093	0.982649	0.0757662	0.877569	0.098766	0.319802	0.853311	0.159218	0.065044	0.0622093	1.95702	0.982649	0.404834	0.0757662	2.21281	0.877569	0.130998	0.0571984	0.098766	1.65087	1.53989
584	FBgn0003382_sha	0.401168	0.986359	0.0223888	0.0331016	0.386382	0.0504184	0.127035	0.401168	0.933054	0.303244	0.986359	0.388122	0.0223888	2.41844	0.0331016	2.60738	0.386382	0.972271	0.318054	0.0504184	-1.9564	0.603993
585	FBgn0003386_Shaw	0.673376	0.43408	0.738622	0.692126	0.68207	0.958882	0.96715	0.673376	0.399111	0.0594232	0.43408	1.07793	0.738622	0.764407	0.692126	1.19124	0.68207	0.386048	0.0575596	0.958882	0.0515565	1.01313
586	FBgn0003388_shd	0.15033	0.0320454	0.947859	0.0664239	0.0462091	0.247641	0.177511	0.15033	1.98094	0.356383	0.0320454	2.25403	0.947859	0.500792	0.0664239	2.27435	0.0462091	3.30528	0.438588	0.247641	1.1561	1.53798
587	FBgn0003390_shf	0.240873	0.173116	0.83357	0.324878	0.370183	0.228145	0.680356	0.240873	1.47167	0.2092	0.173116	1.50644	0.83357	0.664109	0.324878	1.54728	0.370183	1.01708	0.170811	0.228145	1.20515	1.28624
588	FBgn0003391_shg	0.756994	0.122565	0.953754	0.163815	0.645367	0.145287	0.543658	0.756994	0.28021	0.0287737	0.122565	1.65874	0.953754	0.488362	0.163815	1.85845	0.645367	0.442427	0.0347513	0.145287	1.45638	1.56034
589	FBgn0003392_shi	0.11805	0.00201904	0.991933	0.00444391	0.0542261	0.0398523	0.0120533	0.11805	2.24642	0.0730454	0.00201904	3.62897	0.991933	0.355442	0.00444391	3.66045	0.0542261	3.12139	0.080011	0.0398523	2.05528	1.86672
590	FBgn0003396_shn	0.776185	0.22198	0.902981	0.313035	0.901276	0.166588	0.664913	0.776185	0.254863	0.046252	0.22198	1.39531	0.902981	0.576379	0.313035	1.56424	0.901276	0.104196	0.033818	0.166588	1.38325	1.28207
591	FBgn0003401_shu	0.177804	0.258438	0.712209	0.528572	0.302524	0.78426	0.691075	0.177804	1.79834	0.393522	0.258438	1.32623	0.712209	0.790693	0.528572	1.32151	0.302524	1.22946	0.346814	0.78426	0.273772	1.10528
592	FBgn0003410_sina	0.780353	0.652279	0.557853	0.904371	0.747897	0.994448	0.992529	0.780353	0.249445	0.0671245	0.652279	0.849558	0.557853	0.943543	0.904371	1.0545	0.747897	0.292461	0.0674142	0.994448	-0.00695864	0.999559
593	FBgn0003411_sisA	NA	NA	NA	NA	NA	NA	1	NA	NA	NA	NA	NA	NA	NA	NA	NA	NA	NA	NA	NA	NA	NA
594	FBgn0003415_skd	0.040499	0.151599	0.636524	0.444939	0.0431049	0.299231	0.21968	0.040499	3.45793	0.0855277	0.151599	1.56516	0.636524	0.865023	0.444939	1.40237	0.0431049	3.38564	0.0798458	0.299231	1.03808	1.34313
595	FBgn0003416_sl	0.83025	0.99354	0.0271045	0.0314903	0.73598	0.0697741	0.151997	0.83025	0.186836	0.0258711	0.99354	0.342968	0.0271045	2.33042	0.0314903	2.63177	0.73598	0.308748	0.0327265	0.0697741	-1.81337	0.637844
596	FBgn0003423_slgA	0.034885	0.0934445	0.713326	0.293459	0.0486114	0.36612	0.191883	0.034885	3.63175	0.0764384	0.0934445	1.77783	0.713326	0.789588	0.293459	1.59369	0.0486114	3.24688	0.0730706	0.36612	0.903765	1.22323
597	FBgn0003429_slo	0.296133	0.0953797	0.920331	0.164973	0.271905	0.153343	0.451978	0.296133	1.25205	0.0826504	0.0953797	1.76883	0.920331	0.550056	0.164973	1.85525	0.271905	1.34255	0.0901577	0.153343	1.42782	1.34819
598	FBgn0003430_slp1	0.170212	0.532672	0.428548	0.891127	0.215039	0.858354	0.67356	0.170212	1.84567	0.178839	0.532672	0.969489	0.428548	1.08444	0.891127	1.06232	0.215039	1.5932	0.19831	0.858354	-0.17847	0.959265
599	FBgn0003435_sm	0.0249912	0.179684	0.524982	0.580805	0.0219414	0.670137	0.124635	0.0249912	4.02466	0.10574	0.179684	1.4899	0.524982	0.977524	0.580805	1.27658	0.0219414	4.17964	0.123507	0.670137	0.42596	1.18688
600	FBgn0003444_smo	0.638703	0.269831	0.855738	0.408875	0.820684	0.422847	0.848455	0.638703	0.453022	0.0447322	0.269831	1.30642	0.855738	0.63819	0.408875	1.4416	0.820684	0.198528	0.0285635	0.422847	0.801492	1.32519
601	FBgn0003447_sn	0.353227	0.0268507	0.980992	0.0417472	0.345645	0.0642197	0.150669	0.353227	1.06624	0.0759749	0.0268507	2.33473	0.980992	0.411496	0.0417472	2.49494	0.345645	1.08903	0.0791848	0.0642197	1.85065	1.55262
602	FBgn0003448_sna	0.13259	0.316136	0.609053	0.690066	1	0.828716	0.574062	0.13259	2.11848	1.38165	0.316136	1.23267	0.609053	0.892125	0.690066	1.19271	1	0	0	0.828716	-0.216349	0.823185
603	FBgn0003449_snf	0.590156	0.921108	0.157841	0.231579	0.539978	0.130856	0.568926	0.590156	0.53389	0.0738945	0.921108	0.548809	0.157841	1.54734	0.231579	1.70131	0.539978	0.625144	0.0865625	0.130856	-1.51074	0.773858
604	FBgn0003450_snk	0.446606	0.289073	0.802565	0.480715	1	0.968381	0.870893	0.446606	0.82138	1.08019	0.289073	1.27456	0.802565	0.698341	0.480715	1.36624	1	0	0	0.968381	-0.0396387	0.963362
605	FBgn0003459_stwl	0.703193	0.932236	0.157443	0.219957	0.733809	0.30944	0.642238	0.703193	0.355023	0.0569977	0.932236	0.530169	0.157443	1.54846	0.219957	1.72467	0.733809	0.311745	0.0531932	0.30944	-1.0164	0.769867
606	FBgn0003460_so	0.181948	0.663747	0.309178	0.631362	0.203728	0.711122	0.7003	0.181948	1.77339	0.0871601	0.663747	0.838318	0.309178	1.24315	0.631362	1.23628	0.203728	1.65131	0.0791039	0.711122	-0.37035	0.880972
607	FBgn0003462_Sod1	0.0962507	0.418837	0.452213	0.963836	0.076331	0.79572	0.378991	0.0962507	2.47298	0.110571	0.418837	1.09602	0.452213	1.05695	0.963836	1.02023	0.076331	2.73293	0.122917	0.79572	-0.25889	0.966012
608	FBgn0003463_sog	0.502155	0.523146	0.614358	0.907696	0.517773	0.819049	0.984775	0.502155	0.7	0.0399881	0.523146	0.979451	0.614358	0.886873	0.907696	1.05255	0.517773	0.668398	0.0403888	0.819049	0.228769	1.03748
609	FBgn0003464_sol	0.510381	0.0542488	0.97353	0.0771875	0.569993	0.014252	0.0825223	0.510381	0.683229	0.139556	0.0542488	2.01772	0.97353	0.437401	0.0771875	2.20414	0.569993	0.569544	0.120824	0.014252	2.45085	1.60626
610	FBgn0003475_spir	0.0274379	0.11587	0.640438	0.381501	0.010248	0.738379	0.0599338	0.0274379	3.91402	0.106342	0.11587	1.68341	0.640438	0.861177	0.381501	1.47359	0.010248	5.10523	0.1224	0.738379	0.334001	1.10749
611	FBgn0003479_spn-A	0.951301	0.666643	0.576206	0.908117	0.977811	0.672709	0.994207	0.951301	0.0499824	0.0381409	0.666643	0.835481	0.576206	0.924936	0.908117	1.0523	0.977811	0.0224506	0.0299043	0.672709	-0.422433	0.884306
612	FBgn0003480_spn-B	0.809117	0.4041	0.78675	0.612725	0.921537	0.631964	0.955224	0.809117	0.212859	0.0732922	0.4041	1.11396	0.78675	0.715134	0.612725	1.25081	0.921537	0.0818681	0.0395708	0.631964	0.478964	1.1188
613	FBgn0003482_spn-D	0.177803	0.812189	0.162048	0.32834	0.0845622	0.498896	0.411464	0.177803	1.79834	0.344025	0.812189	0.687922	0.162048	1.53571	0.32834	1.54244	0.0845622	2.61777	0.40362	0.498896	-0.676229	0.715334
614	FBgn0003483_spn-E	0.81193	0.062851	0.981355	0.0778358	0.648469	0.0514551	0.271638	0.81193	0.209354	0.0626295	0.062851	1.95248	0.981355	0.410075	0.0778358	2.20025	0.648469	0.437534	0.0909857	0.0514551	1.94766	1.41837
615	FBgn0003486_spo	NA	NA	NA	NA	NA	NA	1	NA	NA	NA	NA	NA	NA	NA	NA	NA	NA	NA	NA	NA	NA	NA
616	FBgn0003495_spz	0.278411	0.0830114	0.92702	0.145387	0.23769	0.141824	0.405456	0.278411	1.31745	0.0786527	0.0830114	1.82985	0.92702	0.5391	0.145387	1.91277	0.23769	1.48588	0.0801679	0.141824	1.46903	1.51147
617	FBgn0003499_sr	0.947938	0.681602	0.559283	0.875743	0.976154	0.879232	0.992672	0.947938	0.0535332	0.0233115	0.681602	0.820817	0.559283	0.942084	0.875743	1.07151	0.976154	0.0241481	0.0171483	0.879232	-0.151943	0.943701
618	FBgn0003502_Btk29A	0.662273	0.714238	0.460304	0.743257	0.565908	0.634542	0.975289	0.662273	0.416051	0.0324403	0.714238	0.788686	0.460304	1.04776	0.743257	1.15572	0.565908	0.576929	0.0426535	0.634542	-0.475343	0.977956
619	FBgn0003507_srp	0.902074	0.0405722	0.990537	0.0470366	0.698165	0.0594618	0.220037	0.902074	0.103306	0.0263075	0.0405722	2.14747	0.990537	0.364869	0.0470366	2.43774	0.698165	0.362319	0.0505339	0.0594618	1.88476	1.5746
620	FBgn0003510_Sry-alpha	0.970907	0.187982	0.935732	0.244804	0.858229	0.176683	0.68854	0.970907	0.0295449	0.0436637	0.187982	1.46981	0.935732	0.523964	0.244804	1.6761	0.858229	0.153429	0.0908466	0.176683	1.35104	1.27387
621	FBgn0003511_Sry-beta	0.881997	0.0750939	0.97883	0.0918639	0.755485	0.0942894	0.373983	0.881997	0.125934	0.0912617	0.0750939	1.87395	0.97883	0.419621	0.0918639	2.12336	0.755485	0.282231	0.106205	0.0942894	1.67319	1.74088
622	FBgn0003512_Sry-delta	0.629339	0.00733635	0.997797	0.00883018	0.646277	0.0913318	0.0432186	0.629339	0.468108	0.129348	0.00733635	2.95367	0.997797	0.29143	0.00883018	3.28238	0.646277	0.440988	0.154359	0.0913318	1.68841	1.57895
623	FBgn0003513_ss	0.028744	0.309027	0.385279	0.907641	0.00649553	0.692072	0.0383457	0.028744	3.85911	0.166219	0.309027	1.24338	0.385279	1.13756	0.907641	1.05258	0.00649553	5.67549	0.176275	0.692072	-0.396045	0.886925
624	FBgn0003514_sqh	0.379529	0.272541	0.796812	0.468621	0.365343	0.291637	0.851799	0.379529	0.990985	0.0852779	0.272541	1.30181	0.796812	0.704494	0.468621	1.37817	0.365343	1.03087	0.0780771	0.291637	1.05454	1.17726
625	FBgn0003515_st	0.0786024	0.378739	0.461785	0.908645	0.137411	0.902479	0.388097	0.0786024	2.6999	0.160141	0.378739	1.14596	0.461785	1.04609	0.908645	1.05199	0.137411	2.07928	0.163275	0.902479	0.12253	1.02986
626	FBgn0003517_sta	0.817252	0.0411986	0.989007	0.0494154	0.946351	0.144521	0.223088	0.817252	0.202758	0.0920863	0.0411986	2.14059	0.989007	0.37411	0.0494154	2.41419	0.946351	0.0552124	0.0527563	0.144521	1.45916	1.54903
627	FBgn0003520_stau	0.411442	0.0843228	0.947022	0.131489	0.261627	0.174436	0.41054	0.411442	0.906685	0.0496466	0.0843228	1.82295	0.947022	0.502486	0.131489	1.95861	0.261627	1.38353	0.0622635	0.174436	1.35809	1.32881
628	FBgn0003525_stg	0.896067	0.10435	0.968251	0.130723	0.989983	0.341467	0.483786	0.896067	0.11002	0.0954512	0.10435	1.72938	0.968251	0.452898	0.130723	1.96128	0.989983	0.0100697	0.0374017	0.341467	0.95127	1.51083
629	FBgn0003527_stil	0.510746	0.0710723	0.964272	0.102712	1	0.0098706	0.0577813	0.510746	0.68249	1.98833	0.0710723	1.8982	0.964272	0.463507	0.102712	2.07186	1	0	7.39e-17	0.0098706	2.58033	4.01146
630	FBgn0003545_sub	0.267726	0.999887	4.17e-05	6.33e-05	1	0.00639328	0.000250294	0.267726	1.35901	2.06685	0.999887	0.196992	4.17e-05	6.16382	6.33e-05	6.56611	1	0	1.45e-15	0.00639328	2.7269	2840060000000000
631	FBgn0003557_Su(dx)	0.811696	0.298037	0.86073	0.431337	0.913902	0.222906	0.779788	0.811696	0.209645	0.0196186	0.298037	1.26033	0.86073	0.632138	0.431337	1.41681	0.913902	0.0902212	0.0118272	0.222906	1.21884	1.24113
632	FBgn0003559_su(f)	0.554196	0.429187	0.715044	0.711021	0.775031	0.696325	0.965409	0.554196	0.598413	0.0596676	0.429187	1.08369	0.715044	0.787888	0.711021	1.17788	0.775031	0.256369	0.0350527	0.696325	0.390286	1.16431
633	FBgn0003567_su(Hw)	0.572393	0.956067	0.0939994	0.133625	0.421076	0.134309	0.446942	0.572393	0.565231	0.043816	0.956067	0.483223	0.0939994	1.77523	0.133625	1.95125	0.421076	0.882576	0.0491226	0.134309	-1.49732	0.700763
634	FBgn0003575_su(sable)	0.697066	0.07758	0.97136	0.102403	0.792275	0.0400999	0.217731	0.697066	0.363921	0.0688837	0.07758	1.85961	0.97136	0.443997	0.102403	2.07325	0.792275	0.234112	0.0412654	0.0400999	2.05272	1.43594
635	FBgn0003598_Su(var)3-7	0.827294	0.260223	0.885806	0.368112	0.85014	0.0981	0.461792	0.827294	0.190433	0.0590665	0.260223	1.32307	0.885806	0.600189	0.368112	1.49003	0.85014	0.162969	0.0482049	0.0981	1.65414	1.27779
636	FBgn0003607_Su(var)205	0.481973	0.0490072	0.974816	0.0706313	0.626279	0.158488	0.260287	0.481973	0.742397	0.0475344	0.0490072	2.06294	0.974816	0.433323	0.0706313	2.24558	0.626279	0.473089	0.0411567	0.158488	1.41018	1.58033
637	FBgn0003612_Su(var)2-10	0.43217	0.157464	0.899253	0.251634	0.46177	0.239149	0.64229	0.43217	0.85552	0.0689117	0.157464	1.5484	0.899253	0.581711	0.251634	1.66361	0.46177	0.786741	0.0766297	0.239149	1.17712	1.29442
638	FBgn0003638_su(w[a])	0.447831	0.207151	0.866084	0.334664	0.536488	0.147889	0.617195	0.447831	0.818536	0.0964865	0.207151	1.4264	0.866084	0.625544	0.334664	1.53371	0.536488	0.631818	0.0959701	0.147889	1.44703	1.22533
639	FBgn0003651_svp	0.962672	0.0483128	0.989177	0.0555069	0.973863	0.18917	0.25704	0.962672	0.0380765	0.015542	0.0483128	2.06931	0.989177	0.37313	0.0555069	2.35897	0.973863	0.0265014	0.00884792	0.18917	1.31304	1.65535
640	FBgn0003654_sw	0.74144	0.0367793	0.989117	0.0452439	0.612392	0.0629542	0.201353	0.74144	0.301253	0.0286906	0.0367793	2.19166	0.989117	0.373475	0.0452439	2.45633	0.612392	0.496017	0.0350388	0.0629542	1.85951	1.61397
641	FBgn0003655_swa	0.372416	0.998671	0.0018126	0.00255278	0.247748	0.494362	0.0108264	0.372416	1.01079	0.526099	0.998671	0.271243	0.0018126	3.68861	0.00255278	3.98136	0.247748	1.44162	0.407675	0.494362	-0.683388	0.682401
642	FBgn0003656_sws	0.888868	0.817259	0.377752	0.554788	0.978981	0.409123	0.941953	0.888868	0.11813	0.0130613	0.817259	0.682364	0.377752	1.14724	0.554788	1.2985	0.978981	0.0212538	0.00391931	0.409123	-0.825438	0.885385
643	FBgn0003660_Syb	0.0340953	0.401126	0.317206	0.900237	0.0283749	0.619479	0.158619	0.0340953	3.65853	0.0841301	0.401126	1.11763	0.317206	1.23108	0.900237	1.05693	0.0283749	3.87436	0.0870485	0.619479	-0.496589	0.93867
644	FBgn0003676_CCT1	0.964065	0.00910291	0.998663	0.00944348	0.959338	0.00603547	0.0356708	0.964065	0.0366277	0.0385245	0.00910291	2.84701	0.998663	0.271472	0.00944348	3.24649	0.959338	0.0415521	0.0382949	0.00603547	2.74585	1.78592
645	FBgn0003683_term	0.645209	0.956296	0.103219	0.142553	1	0.969666	0.479864	0.645209	0.442676	0.74555	0.956296	0.482707	0.103219	1.73416	0.142553	1.92174	1	0	1.6e-16	0.969666	0.0380267	1.02843
646	FBgn0003687_Tbp	0.671046	0.517311	0.665911	0.849706	0.686465	0.997817	0.987353	0.671046	0.402641	0.075585	0.517311	0.985597	0.665911	0.836198	0.849706	1.08731	0.686465	0.379511	0.0759809	0.997817	-0.00273652	0.998382
647	FBgn0003701_thr	0.192111	0.581272	0.399347	0.810983	0.132472	0.961102	0.573714	0.192111	1.71462	0.404238	0.581272	0.919837	0.399347	1.11984	0.810983	1.11143	0.132472	2.11946	0.39995	0.961102	-0.0487713	0.975086
648	FBgn0003710_tipE	0.0843032	0.0905096	0.820717	0.223895	0.0650955	0.423888	0.332266	0.0843032	2.62122	0.0778555	0.0905096	1.79185	0.820717	0.678543	0.223895	1.71662	0.0650955	2.91305	0.0785265	0.423888	0.799693	1.22878
649	FBgn0003714_tko	0.0404564	0.0950249	0.729116	0.286653	0.0586887	0.126167	0.219472	0.0404564	3.45915	0.142559	0.0950249	1.77047	0.729116	0.773911	0.286653	1.60437	0.0586887	3.03099	0.140331	0.126167	1.52939	1.25487
650	FBgn0003716_tkv	0.862088	0.0869697	0.973809	0.108475	0.737455	0.129757	0.42069	0.862088	0.148912	0.0177471	0.0869697	1.80937	0.973809	0.436528	0.108475	2.04675	0.737455	0.306717	0.0215345	0.129757	1.51506	1.4019
651	FBgn0003719_tld	0.438378	0.832216	0.2489	0.410365	0.458829	0.538527	0.82045	0.438378	0.840694	0.101068	0.832216	0.665648	0.2489	1.34341	0.410365	1.43992	0.458829	0.793365	0.106389	0.538527	-0.615042	0.853794
652	FBgn0003720_tll	0.270973	0.391422	0.642662	0.742615	1	0.0494723	0.262455	0.270973	1.3462	2.33438	0.391422	1.12977	0.642662	0.858993	0.742615	1.15616	1	0	3.06e-17	0.0494723	1.9645	1.44776
653	FBgn0003721_Tm1	0.0614698	0.155256	0.689005	0.41128	0.058432	0.282918	0.303197	0.0614698	2.97822	0.0891874	0.155256	1.55464	0.689005	0.813551	0.41128	1.43889	0.058432	3.03599	0.0845539	0.282918	1.07379	1.21409
654	FBgn0003731_Egfr	0.181727	0.0399223	0.946731	0.0781242	0.177313	0.0575878	0.216862	0.181727	1.7747	0.117243	0.0399223	2.15473	0.946731	0.503072	0.0781242	2.19853	0.177313	1.80133	0.120253	0.0575878	1.89882	1.39458
655	FBgn0003733_tor	0.163532	0.432682	0.522104	0.906298	0.0818417	0.902295	0.400892	0.163532	1.88918	0.45203	0.432682	1.07957	0.522104	0.980546	0.906298	1.05337	0.0818417	2.65448	0.478794	0.902295	0.122762	1.05623
656	FBgn0003741_tra	0.887854	0.228394	0.909494	0.312034	0.900193	0.24373	0.788955	0.887854	0.119278	0.0445071	0.228394	1.38245	0.909494	0.566808	0.312034	1.56571	0.900193	0.105404	0.0313856	0.24373	1.16571	1.19033
657	FBgn0003742_tra2	0.987717	0.00141527	0.999868	0.00134551	0.693938	0.0106073	0.00804598	0.987717	0.012363	0.00894037	0.00141527	3.82743	0.999868	0.200796	0.00134551	4.37112	0.693938	0.368494	0.041592	0.0106073	2.55538	2.0826
658	FBgn0003744_trc	0.872198	0.789296	0.41342	0.619173	0.984472	0.699784	0.959266	0.872198	0.137175	0.0159214	0.789296	0.712456	0.41342	1.10256	0.619173	1.24574	0.984472	0.0156554	0.00711261	0.699784	-0.385612	0.859006
659	FBgn0003747_Gr5a	0.833971	0.388328	0.802145	0.58111	0.741101	0.482931	0.947627	0.833971	0.182326	0.196344	0.388328	1.13368	0.802145	0.698792	0.58111	1.27633	0.741101	0.301715	0.254729	0.482931	0.701596	1.16684
660	FBgn0003748_Treh	0.492085	0.189323	0.887184	0.296276	0.397013	0.554999	0.716152	0.492085	0.720927	0.0687988	0.189323	1.46664	0.887184	0.598345	0.296276	1.58934	0.397013	0.943919	0.0754865	0.554999	0.590285	1.16505
661	FBgn0003751_trk	0.348601	0.0279971	0.979891	0.0437916	0.183579	0.0350034	0.156655	0.348601	1.08008	0.400195	0.0279971	2.31559	0.979891	0.415708	0.0437916	2.47196	0.183579	1.76372	0.540759	0.0350034	2.10832	1.75331
662	FBgn0003861_trp	0.517462	0.125504	0.932696	0.187637	0.541629	0.113724	0.515366	0.517462	0.669017	0.10481	0.125504	1.64833	0.932696	0.529363	0.187637	1.79678	0.541629	0.622002	0.108773	0.113724	1.58167	1.2329
663	FBgn0003862_trx	0.329081	0.615656	0.451144	0.83235	0.44489	0.931187	0.908794	0.329081	1.14068	0.0747574	0.615656	0.885589	0.451144	1.05817	0.83235	1.09802	0.44489	0.825377	0.0577562	0.931187	-0.0863517	0.968528
664	FBgn0003863_alphaTry	NA	NA	NA	NA	NA	NA	1	NA	NA	NA	NA	NA	NA	NA	NA	NA	NA	NA	NA	NA	NA	NA
665	FBgn0003865_tsg	NA	NA	NA	NA	NA	NA	1	NA	NA	NA	NA	NA	NA	NA	NA	NA	NA	NA	NA	NA	NA	NA
666	FBgn0003866_tsh	0.174546	0.206337	0.763648	0.422034	0.24738	0.51381	0.683657	0.174546	1.81839	0.1135	0.206337	1.42817	0.763648	0.739071	0.422034	1.42693	0.24738	1.4432	0.117425	0.51381	0.652917	1.19303
667	FBgn0003867_tsl	0.160448	0.0582743	0.918225	0.119353	0.352086	0.127783	0.302496	0.160448	1.9099	0.127182	0.0582743	1.98596	0.918225	0.553401	0.119353	2.00291	0.352086	1.06964	0.0956367	0.127783	1.5229	1.34589
668	FBgn0003870_ttk	0.970038	0.291745	0.881214	0.403014	0.83131	0.453965	0.873777	0.970038	0.0304413	0.0127047	0.291745	1.27028	0.881214	0.60626	0.403014	1.44828	0.83131	0.185549	0.0309643	0.453965	0.748821	1.18476
669	FBgn0003882_tub	0.280268	0.106447	0.907208	0.187943	0.237174	0.251442	0.490995	0.280268	1.31039	0.0691989	0.106447	1.72065	0.907208	0.570206	0.187943	1.79604	0.237174	1.48821	0.0737904	0.251442	1.14685	1.22899
670	FBgn0003884_alphaTub84B	0.528779	0.0748499	0.963425	0.107359	0.588112	0.241041	0.372992	0.528779	0.646722	0.0710723	0.0748499	1.87538	0.963425	0.465666	0.107359	2.05151	0.588112	0.537445	0.0544769	0.241041	1.17239	1.47736
671	FBgn0003885_alphaTub84D	0.148163	0.0951101	0.868336	0.200784	0.189138	0.1119	0.450997	0.148163	1.9968	0.0644553	0.0951101	1.77008	0.868336	0.622737	0.200784	1.76605	0.189138	1.73147	0.0672879	0.1119	1.58971	1.30958
672	FBgn0003886_alphaTub85E	0.195824	0.713746	0.270033	0.540858	1	0.563174	0.729538	0.195824	1.69396	0.894253	0.713746	0.789173	0.270033	1.30607	0.540858	1.3106	1	0	1.69e-15	0.563174	-0.578133	0.732168
673	FBgn0003888_betaTub60D	0.316991	0.00262999	0.997552	0.00397682	0.368606	0.0168338	0.0156765	0.316991	1.18013	0.124939	0.00262999	3.48499	0.997552	0.295917	0.00397682	3.72357	0.368606	1.02155	0.103853	0.0168338	2.39032	1.90816
674	FBgn0003889_betaTub85D	0.192134	0.285039	0.696008	0.57415	0.216253	0.628855	0.722005	0.192134	1.71449	0.28699	0.285039	1.28108	0.696008	0.806668	0.57415	1.28211	0.216253	1.58716	0.302537	0.628855	0.483339	1.14653
675	FBgn0003890_betaTub97EF	0.761203	0.166607	0.932063	0.228949	0.666871	0.138407	0.590917	0.761203	0.274594	0.0628062	0.166607	1.52343	0.932063	0.530471	0.228949	1.70649	0.666871	0.409	0.0864908	0.138407	1.48175	1.49996
676	FBgn0003891_tud	0.326273	0.257246	0.7918	0.456626	0.328365	0.371579	0.832092	0.326273	1.14971	0.0724987	0.257246	1.32834	0.7918	0.709812	0.456626	1.39029	0.328365	1.14297	0.0651907	0.371579	0.893519	1.18243
677	FBgn0003892_ptc	0.669483	0.769554	0.3947	0.621182	0.626775	0.530252	0.950816	0.669483	0.405017	0.0633446	0.769554	0.733009	0.3947	1.12564	0.621182	1.24417	0.626775	0.47228	0.0713433	0.530252	-0.627622	0.936827
678	FBgn0003896_tup	0.0648224	0.817446	0.0755065	0.201775	0.118674	0.0439661	0.236446	0.0648224	2.91783	0.124378	0.817446	0.682158	0.0755065	1.87154	0.201775	1.76381	0.118674	2.2406	0.123674	0.0439661	-2.01441	0.76663
679	FBgn0003900_twi	0.370819	0.430422	0.653908	0.772922	0.667175	0.840257	0.937963	0.370819	1.01528	0.533783	0.430422	1.08223	0.653908	0.847961	0.772922	1.13597	0.667175	0.408536	0.337323	0.840257	0.201565	1.03896
680	FBgn0003916_snRNA:U1:21D	0.528432	0.877906	0.21155	0.328061	0.568835	0.936127	0.75976	0.528432	0.647397	0.540253	0.877906	0.610566	0.21155	1.41697	0.328061	1.54283	0.568835	0.571632	0.324043	0.936127	0.0801392	1.02016
681	FBgn0003920_snRNA:U2:14B	NA	NA	NA	NA	NA	NA	1	NA	NA	NA	NA	NA	NA	NA	NA	NA	NA	NA	NA	NA	NA	NA
682	FBgn0003922_snRNA:U2:38ABa	NA	NA	NA	NA	NA	NA	1	NA	NA	NA	NA	NA	NA	NA	NA	NA	NA	NA	NA	NA	NA	NA
683	FBgn0003923_snRNA:U2:38ABb	0.296805	0.671472	0.375623	0.697851	0.304249	0.559846	0.879092	0.296805	1.24965	0.339008	0.671472	0.830749	0.375623	1.15	0.697851	1.18716	0.304249	1.22345	0.281597	0.559846	-0.583071	0.861576
684	FBgn0003926_snRNA:U3	NA	NA	NA	NA	NA	NA	1	NA	NA	NA	NA	NA	NA	NA	NA	NA	NA	NA	NA	NA	NA	NA
685	FBgn0003930_snRNA:U4:39B	0.744803	0.809891	0.358933	0.544184	0.595988	0.814759	0.93059	0.744803	0.296664	0.332349	0.809891	0.690425	0.358933	1.17209	0.544184	1.30769	0.595988	0.523813	0.364562	0.814759	0.23429	1.04292
686	FBgn0003931_snRNA:U4:38AB	0.55206	0.270633	0.840306	0.425091	1	0.680955	0.849451	0.55206	0.602384	0.895755	0.270633	1.30505	0.840306	0.656383	0.425091	1.42358	1	0	0	0.680955	0.41116	1.43568
687	FBgn0003933_snRNA:U5:14B	NA	NA	NA	NA	NA	NA	1	NA	NA	NA	NA	NA	NA	NA	NA	NA	NA	NA	NA	NA	NA	NA
688	FBgn0003934_snRNA:U5:23D	0.226877	0.50377	0.50377	1	1	0.000352347	0.00211222	0.226877	1.53571	3.4641	0.50377	1	0.50377	1	1	1	1	0	9.39e-17	0.000352347	3.57342	63.424
689	FBgn0003935_snRNA:U5:34A	NA	NA	NA	NA	NA	NA	1	NA	NA	NA	NA	NA	NA	NA	NA	NA	NA	NA	NA	NA	NA	NA
690	FBgn0003936_snRNA:U5:35D	NA	NA	NA	NA	NA	NA	1	NA	NA	NA	NA	NA	NA	NA	NA	NA	NA	NA	NA	NA	NA	NA
691	FBgn0003938_snRNA:U5:63BC	0.553804	0.608403	0.545824	0.936705	1	0.798438	0.991223	0.553804	0.59914	0.909198	0.608403	0.892769	0.545824	0.955872	0.936705	1.0357	1	0	2.07e-16	0.798438	0.25537	1.20063
692	FBgn0003941_RpL40	0.651475	0.147222	0.933355	0.208838	0.730189	0.076617	0.380143	0.651475	0.432816	0.123962	0.147222	1.57809	0.933355	0.528204	0.208838	1.7482	0.730189	0.316763	0.108277	0.076617	1.77066	1.35767
693	FBgn0003942_RpS27A	0.11781	0.474621	0.428034	0.950219	0.047238	0.987194	0.251991	0.11781	2.24867	0.108251	0.474621	1.03174	0.428034	1.08505	0.950219	1.02796	0.047238	3.27989	0.124232	0.987194	-0.0160509	0.967568
694	FBgn0003943_Ubi-p63E	0.935364	0.223401	0.915873	0.30022	0.915803	0.342508	0.780628	0.935364	0.0669235	0.0318588	0.223401	1.39243	0.915873	0.557084	0.30022	1.58331	0.915803	0.0881337	0.0257871	0.342508	0.949221	1.26439
695	FBgn0003944_Ubx	0.984305	0.141447	0.956896	0.177652	0.890425	0.820008	0.599499	0.984305	0.0158257	0.0562281	0.141447	1.59572	0.956896	0.481343	0.177652	1.82161	0.890425	0.116371	0.121768	0.820008	0.227534	1.10721
696	FBgn0003950_unc	0.760388	0.126468	0.952098	0.169292	1	0.588204	0.555704	0.760388	0.275679	0.618975	0.126468	1.64497	0.952098	0.491945	0.169292	1.8435	1	0	2.48e-16	0.588204	0.54144	1.26924
697	FBgn0003961_Uro	NA	NA	NA	NA	NA	NA	1	NA	NA	NA	NA	NA	NA	NA	NA	NA	NA	NA	NA	NA	NA	NA
698	FBgn0003963_ush	0.1032	0.422068	0.459834	0.959281	0.161754	0.833682	0.479796	0.1032	2.39537	0.123142	0.422068	1.09215	0.459834	1.04829	0.959281	1.02281	0.161754	1.90108	0.11247	0.833682	-0.209981	0.94416
699	FBgn0003964_usp	0.46038	0.151614	0.908054	0.237482	0.460883	0.266012	0.627126	0.46038	0.789865	0.0569526	0.151614	1.56512	0.908054	0.568954	0.237482	1.68989	0.460883	0.788734	0.0603578	0.266012	1.11229	1.27899
700	FBgn0003965_v	0.810046	0.0843024	0.973038	0.10691	0.795283	0.154037	0.410461	0.810046	0.2117	0.0482182	0.0843024	1.82306	0.973038	0.438927	0.10691	2.05343	0.795283	0.230282	0.0531458	0.154037	1.42542	1.4172
701	FBgn0003969_vap	0.544478	0.196208	0.890845	0.299872	0.706608	0.303937	0.730313	0.544478	0.616604	0.0506392	0.196208	1.4507	0.890845	0.593394	0.299872	1.58384	0.706608	0.350099	0.0351247	0.303937	1.02803	1.34347
702	FBgn0003975_vg	0.473358	0.251801	0.838126	0.407809	0.638527	0.330943	0.824571	0.473358	0.761063	0.127605	0.251801	1.33812	0.838126	0.658896	0.407809	1.44281	0.638527	0.453304	0.114242	0.330943	0.972215	1.24363
703	FBgn0003977_vir	0.959413	0.140301	0.956269	0.177368	0.94635	0.119596	0.534316	0.959413	0.0414733	0.0340031	0.140301	1.5993	0.956269	0.482768	0.177368	1.82233	0.94635	0.0552131	0.0363418	0.119596	1.55647	1.30645
704	FBgn0003978_vls	0.854214	0.0473722	0.987667	0.0565329	0.908137	0.0195892	0.111927	0.854214	0.158152	0.0858513	0.0473722	2.07808	0.987667	0.381467	0.0565329	2.35031	0.908137	0.0965761	0.0776177	0.0195892	2.33412	1.51374
705	FBgn0003979_Vm26Aa	0.269131	0.836988	0.181825	0.332254	1	0.202512	0.70003	0.269131	1.35345	1.53404	0.836988	0.660203	0.181825	1.48464	0.332254	1.53702	1	0	6.65e-16	0.202512	1.27443	1.61374
706	FBgn0003980_Vm26Ab	NA	NA	NA	NA	NA	NA	1	NA	NA	NA	NA	NA	NA	NA	NA	NA	NA	NA	NA	NA	NA	NA
707	FBgn0003983_Vm34Ca	NA	NA	NA	NA	NA	NA	1	NA	NA	NA	NA	NA	NA	NA	NA	NA	NA	NA	NA	NA	NA	NA
708	FBgn0003984_vn	0.458328	0.166459	0.897416	0.262842	0.472373	0.307033	0.664601	0.458328	0.794498	0.0816107	0.166459	1.52382	0.897416	0.584303	0.262842	1.64381	0.472373	0.76322	0.0849767	0.307033	1.02147	1.22352
709	FBgn0003996_w	0.988432	0.21707	0.922828	0.286418	0.979418	0.0713622	0.358675	0.988432	0.0116391	0.0147396	0.21707	1.40539	0.922828	0.546026	0.286418	1.60475	0.979418	0.0208071	0.017059	0.0713622	1.80317	1.21871
710	FBgn0003997_hid	0.759727	0.787258	0.392834	0.601108	0.863224	0.42505	0.949899	0.759727	0.27656	0.105566	0.787258	0.714601	0.392834	1.12799	0.601108	1.26006	0.863224	0.147585	0.05283	0.42505	-0.79769	0.903731
711	FBgn0004003_wbl	0.873687	0.637035	0.593022	0.955352	0.947315	0.687048	0.995456	0.873687	0.135458	0.0608663	0.637035	0.86452	0.593022	0.90807	0.955352	1.02504	0.947315	0.0541915	0.0367447	0.687048	-0.402865	0.8939
712	FBgn0004034_y	0.932862	0.280422	0.884343	0.388882	0.953913	0.838454	0.861176	0.932862	0.0696099	0.0281433	0.280422	1.28865	0.884343	0.602135	0.388882	1.46476	0.953913	0.047235	0.0176562	0.838454	0.203871	1.18111
713	FBgn0004045_Yp1	0.434139	2.42e-05	0.99998	2.96e-05	0.298676	0.00475407	0.000145087	0.434139	0.850793	0.167994	2.42e-05	6.59592	0.99998	0.160731	2.96e-05	7.21319	0.298676	1.243	0.165005	0.00475407	2.82324	2.67633
714	FBgn0004047_Yp3	0.902431	0.000145967	0.999988	0.000134854	0.740087	0.00950547	0.00080885	0.902431	0.102908	0.092595	0.000145967	5.24888	0.999988	0.15157	0.000134854	5.96538	0.740087	0.303104	0.137614	0.00950547	2.59332	2.31458
715	FBgn0004049_yrt	0.684371	0.00729577	0.998101	0.00850981	0.627602	0.00548389	0.0324555	0.684371	0.382619	0.0410319	0.00729577	2.95643	0.998101	0.285261	0.00850981	3.30222	0.627602	0.470933	0.0527896	0.00548389	2.77714	1.81542
716	FBgn0004050_z	0.908174	0.204246	0.923701	0.273575	0.922368	0.0949639	0.450465	0.908174	0.0965353	0.0371629	0.204246	1.43273	0.923701	0.544602	0.273575	1.62562	0.922368	0.0809636	0.0350903	0.0949639	1.66978	1.27672
717	FBgn0004052_Z600	0.118911	0.923688	0.0404278	0.0905169	1	0.0137544	0.0797404	0.118911	2.2384	3.5848	0.923688	0.544623	0.0404278	2.14907	0.0905169	2.13019	1	0	8.32e-17	0.0137544	-2.46361	0.355111
718	FBgn0004053_zen	NA	NA	NA	NA	NA	NA	1	NA	NA	NA	NA	NA	NA	NA	NA	NA	NA	NA	NA	NA	NA	NA
719	FBgn0004054_zen2	0.676537	0.425293	0.746472	0.675324	1	0.085988	0.416943	0.676537	0.394342	1.25878	0.425293	1.0883	0.746472	0.756514	0.675324	1.20336	1	0	4.6e-17	0.085988	1.71695	2.40651
720	FBgn0004055_uzip	0.155549	0.000769861	0.997251	0.00150904	0.27885	0.00597789	0.00461028	0.155549	1.94369	0.0763674	0.000769861	4.18151	0.997251	0.301001	0.00150904	4.29974	0.27885	1.31577	0.0621725	0.00597789	2.74899	2.12796
721	FBgn0004057_Zw	0.079411	0.0354795	0.906534	0.0902169	0.0575917	0.147534	0.194865	0.079411	2.68838	0.25888	0.0354795	2.20791	0.906534	0.5712	0.0902169	2.13173	0.0575917	3.05252	0.264857	0.147534	1.4483	1.44517
722	FBgn0004066_Prosalpha4	0.03171	0.0950921	0.697955	0.305922	0.00890303	0.372418	0.0522432	0.03171	3.74354	0.106324	0.0950921	1.77016	0.697955	0.804753	0.305922	1.57473	0.00890303	5.27989	0.114357	0.372418	0.891953	1.21637
723	FBgn0004087_Dhfr	0.244037	0.16705	0.840593	0.311999	0.240787	0.160161	0.649106	0.244037	1.45773	0.142184	0.16705	1.52225	0.840593	0.656051	0.311999	1.56576	0.240787	1.47205	0.174424	0.160161	1.40453	1.34172
724	FBgn0004101_bs	0.373974	0.353788	0.724874	0.6233	0.413755	0.63064	0.92718	0.373974	1.00641	0.068935	0.353788	1.17906	0.724874	0.778135	0.6233	1.24252	0.413755	0.900842	0.0607305	0.63064	0.480827	1.10408
725	FBgn0004102_oc	0.702725	0.00401804	0.999071	0.00453279	0.855251	0.0188613	0.0238673	0.702725	0.3557	0.0755195	0.00401804	3.2604	0.999071	0.258218	0.00453279	3.64925	0.855251	0.15693	0.0425784	0.0188613	2.34826	2.0388
726	FBgn0004103_Pp1-87B	0.1437	0.326398	0.610554	0.700671	0.137971	0.879615	0.589673	0.1437	2.03025	0.0666811	0.326398	1.21757	0.610554	0.890638	0.700671	1.18516	0.137971	2.07481	0.068475	0.879615	0.151457	1.05939
727	FBgn0004106_Cdk1	0.136046	0.531336	0.394725	0.855397	0.00454138	0.567901	0.0269408	0.136046	2.09023	0.560687	0.531336	0.970881	0.394725	1.12561	0.855397	1.08383	0.00454138	6.13163	0.668568	0.567901	0.571146	1.21143
728	FBgn0004107_Cdk2	0.52481	0.799865	0.316778	0.512025	0.426872	0.74737	0.898288	0.52481	0.654483	0.0876277	0.799865	0.701235	0.316778	1.23172	0.512025	1.33655	0.426872	0.868348	0.115561	0.74737	-0.322109	0.877277
729	FBgn0004108_Nrt	0.936582	0.646724	0.594667	0.947126	0.952446	0.704196	0.995565	0.936582	0.0656184	0.0171901	0.646724	0.855007	0.594667	0.906428	0.947126	1.02972	0.952446	0.0487767	0.0161037	0.704196	0.379662	1.08647
730	FBgn0004110_tin	0.65261	0.401782	0.760559	0.637431	1	0.777199	0.954169	0.65261	0.431039	0.658707	0.401782	1.11682	0.760559	0.742227	0.637431	1.23163	1	0	0	0.777199	-0.282971	0.8544
731	FBgn0004117_Tm2	0.177369	0.196882	0.775475	0.400748	0.295919	0.662003	0.690094	0.177369	1.80099	0.147011	0.196882	1.44917	0.775475	0.726894	0.400748	1.45089	0.295919	1.25281	0.138493	0.662003	0.437149	1.08972
732	FBgn0004118_nAChRbeta2	0.572488	0.0792811	0.963939	0.111382	0.29056	0.17691	0.390796	0.572488	0.565062	0.0574783	0.0792811	1.85007	0.963939	0.464358	0.111382	2.03461	0.29056	1.27216	0.0779233	0.17691	1.35033	1.39412
733	FBgn0004132_boca	0.884404	0.219396	0.914032	0.298548	0.893603	0.266696	0.773752	0.884404	0.123193	0.0873411	0.219396	1.40059	0.914032	0.559928	0.298548	1.58585	0.893603	0.112788	0.0714632	0.266696	1.1107	1.24729
734	FBgn0004133_blow	0.579997	0.15137	0.923879	0.222367	0.626555	0.0493593	0.261929	0.579997	0.551691	0.119654	0.15137	1.56583	0.923879	0.544309	0.222367	1.71973	0.626555	0.472639	0.113795	0.0493593	1.96547	1.27012
735	FBgn0004143_nullo	NA	NA	NA	NA	NA	NA	1	NA	NA	NA	NA	NA	NA	NA	NA	NA	NA	NA	NA	NA	NA	NA
736	FBgn0004167_kst	0.807015	0.4781	0.727863	0.747056	0.817511	0.56208	0.979792	0.807015	0.215486	0.0549574	0.4781	1.0279	0.727863	0.77516	0.747056	1.15316	0.817511	0.202438	0.0614055	0.56208	0.579755	1.12843
737	FBgn0004168_5-HT1A	0.790445	0.149744	0.942724	0.201443	0.71311	0.130401	0.56757	0.790445	0.236449	0.0426551	0.149744	1.57059	0.942724	0.51095	0.201443	1.76456	0.71311	0.340793	0.0495584	0.130401	1.51252	1.28709
738	FBgn0004169_up	0.571204	0.146462	0.925869	0.215486	0.50116	0.333207	0.613332	0.571204	0.567365	0.082031	0.146462	1.58037	0.925869	0.541023	0.215486	1.73399	0.50116	0.702048	0.0803574	0.333207	0.967675	1.48516
739	FBgn0004170_sc	0.689819	0.128718	0.946335	0.17752	1	0.310918	0.562525	0.689819	0.374552	0.656504	0.128718	1.63722	0.946335	0.503866	0.17752	1.82194	1	0	3.18e-16	0.310918	-1.0133	5.46e-16
740	FBgn0004171_Mst98Cb	0.441274	0.675407	0.435882	0.757352	1	0.23653	0.80196	0.441274	0.833854	1.47178	0.675407	0.826891	0.435882	1.07582	0.757352	1.14626	1	0	1.54e-16	0.23653	-1.18371	0.578812
741	FBgn0004172_Mst84Da	NA	NA	NA	NA	NA	NA	1	NA	NA	NA	NA	NA	NA	NA	NA	NA	NA	NA	NA	NA	NA	NA
742	FBgn0004173_Mst84Db	NA	NA	NA	NA	NA	NA	1	NA	NA	NA	NA	NA	NA	NA	NA	NA	NA	NA	NA	NA	NA	NA
743	FBgn0004174_Mst84Dc	0.141438	0.465718	0.465718	1	1	0.000352728	0.0021145	0.141438	2.04762	4	0.465718	1.04167	0.465718	1.04167	1	1	1	0	4.87e-17	0.000352728	3.57314	6.45792
744	FBgn0004175_Mst84Dd	NA	NA	NA	NA	NA	NA	1	NA	NA	NA	NA	NA	NA	NA	NA	NA	NA	NA	NA	NA	NA	NA
745	FBgn0004177_mts	0.185106	0.0148301	0.977587	0.028319	0.26827	0.0628566	0.0857464	0.185106	1.75476	0.0694922	0.0148301	2.61152	0.977587	0.424039	0.028319	2.68392	0.26827	1.35686	0.0603423	0.0628566	1.8602	1.58164
746	FBgn0004179_Csp	0.259542	0.0657778	0.938238	0.116672	0.229069	0.143796	0.335185	0.259542	1.39205	0.0617059	0.0657778	1.93237	0.938238	0.519398	0.116672	2.01332	0.229069	1.52542	0.063007	0.143796	1.4618	1.46453
747	FBgn0004181_Ebp	NA	NA	NA	NA	NA	NA	1	NA	NA	NA	NA	NA	NA	NA	NA	NA	NA	NA	NA	NA	NA	NA
748	FBgn0004183_snRNA:U1:82Eb	0.429775	0.853007	0.219299	0.359644	1	0.315688	0.773584	0.429775	0.861297	1.07159	0.853007	0.641464	0.219299	1.40079	0.359644	1.50072	1	2.35e-14	6.03e-16	0.315688	1.00336	73801700000000
749	FBgn0004185_snRNA:U1:95Ca	0.686588	0.924628	0.168614	0.238692	0.581974	0.980045	0.669769	0.686588	0.379329	0.406508	0.924628	0.543079	0.168614	1.51813	0.238692	1.68758	0.581974	0.548202	0.292051	0.980045	0.0250122	1.00948
750	FBgn0004186_snRNA:U1:95Cb	0.686588	0.924628	0.168614	0.238692	0.581974	0.980045	0.669769	0.686588	0.379329	0.406508	0.924628	0.543079	0.168614	1.51813	0.238692	1.68758	0.581974	0.548202	0.292051	0.980045	0.0250122	1.00948
751	FBgn0004187_snRNA:U1:95Cc	0.551068	0.761265	0.373016	0.607683	1	0.927677	0.939251	0.551068	0.604233	0.671644	0.761265	0.741507	0.373016	1.1534	0.607683	1.25481	1	0	2.93e-15	0.927677	0.0907673	1.16103
752	FBgn0004188_snRNA:U6:96Aa	0.621328	0.427426	0.732852	0.691306	0.587041	0.910416	0.964764	0.621328	0.481202	0.328105	0.427426	1.08577	0.732852	0.770183	0.691306	1.19183	0.587041	0.539314	0.366552	0.910416	-0.112513	0.986796
753	FBgn0004189_snRNA:U6:96Ab	0.621328	0.427426	0.732852	0.691306	0.587041	0.910416	0.964764	0.621328	0.481202	0.328105	0.427426	1.08577	0.732852	0.770183	0.691306	1.19183	0.587041	0.539314	0.366552	0.910416	-0.112513	0.986796
754	FBgn0004190_snRNA:U6:96Ac	0.621328	0.427426	0.732852	0.691306	0.587041	0.910416	0.964764	0.621328	0.481202	0.328105	0.427426	1.08577	0.732852	0.770183	0.691306	1.19183	0.587041	0.539314	0.366552	0.910416	-0.112513	0.986796
755	FBgn0004191_snRNA:U2:34ABa	0.136493	0.461781	0.464002	0.997649	0.256193	0.948714	0.585432	0.136493	2.08663	0.396875	0.461781	1.04609	0.464002	1.04359	0.997649	1.0013	0.256193	1.40588	0.341317	0.948714	0.0643223	1.01842
756	FBgn0004192_snRNA:U2:34ABb	0.380523	0.317969	0.758557	0.553119	0.157004	0.25925	0.641116	0.380523	0.988247	0.179803	0.317969	1.22995	0.758557	0.744268	0.553119	1.29994	0.157004	1.93355	0.173303	0.25925	1.12817	1.62257
757	FBgn0004197_Ser	0.937948	0.965717	0.114809	0.14316	0.926008	0.708022	0.518915	0.937948	0.0641567	0.0405855	0.965717	0.459747	0.114809	1.68745	0.14316	1.9198	0.926008	0.0770095	0.0240463	0.708022	-0.374514	0.870662
758	FBgn0004198_ct	0.714134	0.019689	0.9945	0.0236795	0.60117	0.195093	0.112469	0.714134	0.339335	0.0339518	0.019689	2.47816	0.9945	0.334374	0.0236795	2.77264	0.60117	0.514947	0.0351899	0.195093	1.29566	1.5174
759	FBgn0004227_nonA	0.476863	0.140186	0.918206	0.216224	0.603313	0.24057	0.595957	0.476863	0.753427	0.0509307	0.140186	1.59967	0.918206	0.553431	0.216224	1.73244	0.603313	0.511304	0.0410182	0.24057	1.17356	1.34849
760	FBgn0004228_mex1	0.890942	0.0827792	0.976298	0.101773	1	0.463911	0.404553	0.890942	0.115787	0.249167	0.0827792	1.83108	0.976298	0.428447	0.101773	2.07609	1	2.3e-13	1e-13	0.463911	0.732421	1.32228
761	FBgn0004237_Hrb87F	0.734994	0.788963	0.385051	0.591653	0.801586	0.470824	0.94592	0.734994	0.310109	0.0325046	0.788963	0.712806	0.385051	1.13785	0.591653	1.26769	0.801586	0.222305	0.029337	0.470824	-0.72114	0.873336
762	FBgn0004240_DptA	0.505197	1	1.1e-09	1.15e-09	0.917822	0.162674	6.58e-09	0.505197	0.693765	1.19703	1	0.0689924	1.1e-09	20.0449	1.15e-09	22.161	0.917822	0.0859234	0.0924477	0.162674	1.39614	7.38827
763	FBgn0004242_Syt1	0.88291	0.212175	0.917726	0.28767	0.921429	0.200227	0.738302	0.88291	0.124893	0.0576226	0.212175	1.41565	0.917726	0.554187	0.28767	1.60276	0.921429	0.0819851	0.0428102	0.200227	1.28091	1.22536
764	FBgn0004244_Rdl	0.842631	0.0480935	0.987213	0.0577137	0.873784	0.0504559	0.256012	0.842631	0.17191	0.0619232	0.0480935	2.07134	0.987213	0.383832	0.0577137	2.34053	0.873784	0.135346	0.0539869	0.0504559	1.95608	1.42848
765	FBgn0004359_T48	0.158874	0.663885	0.28969	0.608526	0.153751	0.886683	0.632728	0.158874	1.92064	0.10082	0.663885	0.838183	0.28969	1.27357	0.608526	1.25414	0.153751	1.95637	0.0847503	0.886683	-0.142502	0.945504
766	FBgn0004360_Wnt2	0.943199	0.3502	0.842463	0.501107	0.888355	0.278696	0.859166	0.943199	0.0585579	0.0419884	0.3502	1.18397	0.842463	0.653883	0.501107	1.34671	0.888355	0.11871	0.0844966	0.278696	1.08325	1.20078
767	FBgn0004362_HmgD	0.890909	0.010272	0.998215	0.0110373	0.80463	0.0300393	0.0600711	0.890909	0.115824	0.0275898	0.010272	2.78798	0.998215	0.282767	0.0110373	3.16383	0.80463	0.218475	0.0412505	0.0300393	2.16957	1.80208
768	FBgn0004363_porin	0.907924	0.00846981	0.998633	0.00895283	0.728968	0.00464251	0.0275338	0.907924	0.0968122	0.0384023	0.00846981	2.88246	0.998633	0.272319	0.00895283	3.27499	0.728968	0.318461	0.0732225	0.00464251	2.83085	1.92173
769	FBgn0004364_18w	0.963834	0.25211	0.902888	0.341606	0.988295	0.251661	0.824373	0.963834	0.0368681	0.013603	0.25211	1.33756	0.902888	0.576514	0.341606	1.52431	0.988295	0.0117777	0.00603763	0.251661	1.14632	1.25868
770	FBgn0004367_mei-41	0.609436	0.284804	0.840524	0.439202	0.625467	0.35367	0.866171	0.609436	0.500968	0.0860433	0.284804	1.28146	0.840524	0.656131	0.439202	1.40841	0.625467	0.474416	0.0805554	0.35367	0.927494	1.23324
771	FBgn0004368_Ptp4E	0.614438	0.07913	0.966522	0.108761	0.703469	0.128126	0.390196	0.614438	0.492606	0.0636544	0.07913	1.85091	0.966522	0.457608	0.108761	2.04554	0.703469	0.354624	0.053832	0.128126	1.52153	1.33235
772	FBgn0004369_Ptp99A	0.0526002	0.00551353	0.962657	0.0163814	0.098143	0.0575863	0.0326285	0.0526002	3.15627	0.103143	0.00551353	3.09747	0.962657	0.467595	0.0163814	2.9588	0.098143	2.45128	0.0873187	0.0575863	1.89883	1.68613
773	FBgn0004370_Ptp10D	0.733765	0.0771275	0.973096	0.100151	0.763018	0.127349	0.382197	0.733765	0.311806	0.0316467	0.0771275	1.86219	0.973096	0.438748	0.100151	2.08349	0.763018	0.272182	0.0252959	0.127349	1.52464	1.48237
774	FBgn0004372_aly	0.624168	0.714648	0.449732	0.732207	1	0.819748	0.972238	0.624168	0.47654	0.592532	0.714648	0.788281	0.449732	1.05978	0.732207	1.16323	1	1.12e-14	1.15e-16	0.819748	0.22787	1.0353
775	FBgn0004373_fwd	0.336763	0.194123	0.84896	0.335975	0.231232	0.531915	0.726088	0.336763	1.1164	0.0563401	0.194123	1.45547	0.84896	0.646271	0.335975	1.53192	0.231232	1.51535	0.0647987	0.531915	0.625085	1.24995
776	FBgn0004374_neb	0.227026	0.193127	0.808127	0.369451	0.28131	0.623436	0.724051	0.227026	1.53501	0.299799	0.193127	1.45777	0.808127	0.69234	0.369451	1.48836	0.28131	1.30645	0.294112	0.623436	0.490987	1.12999
777	FBgn0004378_Klp61F	0.188609	0.156344	0.82449	0.31171	0.168051	0.307688	0.639427	0.188609	1.7345	0.644902	0.156344	1.55155	0.82449	0.674346	0.31171	1.56618	0.168051	1.85955	0.548993	0.307688	1.02009	1.43512
778	FBgn0004379_Klp67A	0.681463	0.615349	0.573576	0.957742	0.783665	0.957094	0.993988	0.681463	0.386954	0.172613	0.615349	0.885892	0.573576	0.927588	0.957742	1.02368	0.783665	0.24516	0.150676	0.957094	0.0538006	1.02298
779	FBgn0004380_Klp64D	0.743005	0.184186	0.921116	0.257438	0.635084	0.198895	0.705187	0.743005	0.299114	0.0537704	0.184186	1.47889	0.921116	0.548796	0.257438	1.65325	0.635084	0.458826	0.0625618	0.198895	1.2847	1.31225
780	FBgn0004381_Klp68D	0.423948	0.296065	0.790652	0.499427	0.359678	0.488834	0.878327	0.423948	0.875501	0.0621058	0.296065	1.26343	0.790652	0.711026	0.499427	1.34829	0.359678	1.04725	0.0599635	0.488834	0.692165	1.18008
781	FBgn0004387_Klp98A	0.664046	0.723754	0.449545	0.722775	0.810253	0.649148	0.972182	0.664046	0.413326	0.0319987	0.723754	0.779248	0.449545	1.06	0.722775	1.16971	0.810253	0.211441	0.0278175	0.649148	-0.454947	0.899606
782	FBgn0004389_bnk	NA	NA	NA	NA	NA	NA	1	NA	NA	NA	NA	NA	NA	NA	NA	NA	NA	NA	NA	NA	NA	NA
783	FBgn0004390_RasGAP1	0.353924	0.0213353	0.984896	0.0328736	0.522154	0.0128354	0.0745829	0.353924	1.06417	0.0701889	0.0213353	2.44079	0.984896	0.39505	0.0328736	2.61076	0.522154	0.659712	0.0594487	0.0128354	2.4883	1.57079
784	FBgn0004391_shtd	0.995416	0.0454501	0.99043	0.051408	0.998954	0.00727064	0.0428386	0.995416	0.00459463	0.0117173	0.0454501	2.09659	0.99043	0.365552	0.051408	2.39537	0.998954	0.00104702	0.00713897	0.00727064	2.68419	1.60234
785	FBgn0004394_pdm2	0.115919	0.327398	0.576457	0.734103	0.273971	0.848411	0.522524	0.115919	2.26655	0.223062	0.327398	1.21612	0.576457	0.924682	0.734103	1.16194	0.273971	1.33451	0.185233	0.848411	0.191146	1.09018
786	FBgn0004395_unk	0.510945	0.522704	0.617582	0.903997	0.324401	0.775103	0.90491	0.510945	0.68209	0.0803924	0.522704	0.979916	0.617582	0.883685	0.903997	1.05472	0.324401	1.15577	0.0955496	0.775103	0.285707	1.08818
787	FBgn0004396_CrebA	0.0507584	0.0163152	0.923579	0.0484272	0.0592497	0.123599	0.0939842	0.0507584	3.19718	0.325775	0.0163152	2.56635	0.923579	0.544801	0.0484272	2.42382	0.0592497	3.02013	0.241293	0.123599	1.53984	1.65364
788	FBgn0004397_Vinc	0.00835466	0.342361	0.2003	0.798851	0.00816797	0.816232	0.0480179	0.00835466	5.35919	0.125016	0.342361	1.19483	0.2003	1.44147	0.798851	1.11916	0.00816797	5.38744	0.128377	0.816232	-0.232394	0.976373
789	FBgn0004400_rhi	0.976745	0.714776	0.526735	0.808895	0.992366	0.842952	0.988764	0.976745	0.023543	0.0326688	0.714776	0.788154	0.526735	0.975687	0.808895	1.11276	0.992366	0.00766474	0.0220787	0.842952	-0.198119	0.964593
790	FBgn0004401_Pep	0.661603	0.923672	0.166108	0.23722	0.668595	0.21391	0.663753	0.661603	0.417083	0.0592083	0.923672	0.544648	0.166108	1.52476	0.23722	1.69039	0.668595	0.40637	0.0640389	0.21391	-1.24289	0.813235
791	FBgn0004403_RpS14a	0.634068	0.0823297	0.966037	0.112385	0.780808	0.237466	0.4028	0.634068	0.46046	0.145964	0.0823297	1.83347	0.966037	0.458899	0.112385	2.03049	0.780808	0.248855	0.0915564	0.237466	1.18134	1.2702
792	FBgn0004404_RpS14b	0.633197	0.0775109	0.968329	0.105398	0.928254	0.254598	0.383735	0.633197	0.461864	0.280795	0.0775109	1.86	0.968329	0.452682	0.105398	2.05998	0.928254	0.0745788	0.104707	0.254598	1.13925	1.40778
793	FBgn0004406_tam	0.727486	0.121179	0.952633	0.163691	0.761048	0.0514203	0.271477	0.727486	0.320526	0.110588	0.121179	1.66374	0.952633	0.490797	0.163691	1.8588	0.761048	0.274801	0.101454	0.0514203	1.94796	1.45063
794	FBgn0004407_DNApol-gamma35	0.446128	0.382823	0.724136	0.654434	0.50154	0.692558	0.944734	0.446128	0.822493	0.0942909	0.382823	1.1407	0.724136	0.778869	0.654434	1.21878	0.50154	0.701266	0.0914121	0.692558	0.395386	1.10908
795	FBgn0004414_msopa	NA	NA	NA	NA	NA	NA	1	NA	NA	NA	NA	NA	NA	NA	NA	NA	NA	NA	NA	NA	NA	NA
796	FBgn0004419_me31B	0.494985	0.0669099	0.965521	0.0972936	0.639192	0.100421	0.340004	0.494985	0.714856	0.069176	0.0669099	1.92483	0.965521	0.460262	0.0972936	2.09684	0.639192	0.452241	0.0515689	0.100421	1.64282	1.4907
797	FBgn0004425_LysB	0.505849	0.996466	0.00821197	0.010762	1	0.361273	0.0482713	0.505849	0.692433	1.50191	0.996466	0.312454	0.00821197	2.89772	0.010762	3.17715	1	0	7.66e-17	0.361273	0.912943	1.37491
798	FBgn0004426_LysC	NA	NA	NA	NA	NA	NA	1	NA	NA	NA	NA	NA	NA	NA	NA	NA	NA	NA	NA	NA	NA	NA
799	FBgn0004427_LysD	0.457245	0.899923	0.162617	0.256498	1	0.613287	0.655217	0.457245	0.796952	1.26802	0.899923	0.580761	0.162617	1.53416	0.256498	1.65492	1	0	1.18e-17	0.613287	-0.505388	0.76646
800	FBgn0004428_LysE	0.0263571	0.0577687	0.754459	0.201396	1	0.799435	0.148081	0.0263571	3.96156	2.44876	0.0577687	1.98982	0.754459	0.748435	0.201396	1.76467	1	0	5.38e-16	0.799435	0.254079	1.06304
801	FBgn0004429_LysP	NA	NA	NA	NA	NA	NA	1	NA	NA	NA	NA	NA	NA	NA	NA	NA	NA	NA	NA	NA	NA	NA
802	FBgn0004430_LysS	0.0748261	0.424126	0.408178	0.982382	1	0.511648	0.372895	0.0748261	2.75538	2.32581	0.424126	1.08969	0.408178	1.10895	0.982382	1.0098	1	0	2.83e-16	0.511648	-0.656274	0.874248
803	FBgn0004431_LysX	0.224987	0.929688	0.0665006	0.123245	1	0.0168061	0.0966937	0.224987	1.54468	3.01171	0.929688	0.534577	0.0665006	1.92754	0.123245	1.98821	1	0	3.82e-17	0.0168061	-2.39092	0.373611
804	FBgn0004432_Cyp1	0.214868	0.00458752	0.993001	0.00812966	0.162131	0.0142595	0.0272114	0.214868	1.59406	0.136005	0.00458752	3.19167	0.993001	0.347389	0.00812966	3.32682	0.162131	1.89855	0.141458	0.0142595	2.45066	1.94608
805	FBgn0004435_Galphaq	0.197427	0.0857784	0.901667	0.166414	0.201473	0.302095	0.41614	0.197427	1.68517	0.0859103	0.0857784	1.81543	0.901667	0.57827	0.166414	1.8513	0.201473	1.6633	0.0888911	0.302095	1.03195	1.23866
806	FBgn0004436_Ubc6	0.108436	0.0561505	0.894152	0.129479	0.185435	0.130001	0.293005	0.108436	2.34044	0.0931557	0.0561505	2.00242	0.894152	0.588853	0.129479	1.96565	0.185435	1.75285	0.0759947	0.130001	1.5141	1.41354
807	FBgn0004449_Ten-m	0.836444	0.570252	0.651727	0.91741	0.758779	0.536524	0.990088	0.836444	0.17934	0.0181194	0.570252	0.930947	0.651727	0.850099	0.91741	1.04687	0.758779	0.277825	0.0225954	0.536524	-0.618079	0.790954
808	FBgn0004456_mew	0.622608	0.113519	0.949326	0.159628	0.620354	0.0717462	0.360265	0.622608	0.479098	0.0651905	0.113519	1.69241	0.949326	0.497781	0.159628	1.87023	0.620354	0.482807	0.0727073	0.0717462	1.80073	1.40942
809	FBgn0004463_RpIII128	0.700419	0.275108	0.86124	0.408469	0.894001	0.382431	0.854909	0.700419	0.359041	0.0545407	0.275108	1.29749	0.86124	0.631515	0.408469	1.44206	0.894001	0.112341	0.0304418	0.382431	0.873427	1.1208
810	FBgn0004465_Su(P)	0.428942	0.248973	0.829822	0.41269	0.359551	0.36564	0.820554	0.428942	0.863315	0.0990059	0.248973	1.34328	0.829822	0.668358	0.41269	1.43731	0.359551	1.04762	0.12521	0.36564	0.904671	1.16578
811	FBgn0004507_GlyP	0.566129	0.00528658	0.998148	0.00653913	0.639142	0.0289439	0.0313032	0.566129	0.576527	0.121266	0.00528658	3.11889	0.998148	0.284247	0.00653913	3.44524	0.639142	0.452321	0.10157	0.0289439	2.18425	1.69353
812	FBgn0004509_Fur1	0.760785	0.313769	0.843832	0.464474	0.780821	0.70632	0.895571	0.760785	0.275151	0.0351463	0.313769	1.23621	0.843832	0.652289	0.464474	1.38233	0.780821	0.248838	0.0330238	0.70632	0.376803	1.09305
813	FBgn0004510_Ets97D	0.742124	0.202116	0.911005	0.285399	0.677626	0.194391	0.726633	0.742124	0.300318	0.0668987	0.202116	1.43743	0.911005	0.564538	0.285399	1.60637	0.677626	0.392702	0.0768227	0.194391	1.2977	1.30852
814	FBgn0004511_dy	0.205979	0.122938	0.867128	0.237883	0.0845151	0.86352	0.411282	0.205979	1.63948	0.514235	0.122938	1.65741	0.867128	0.624245	0.237883	1.68912	0.0845151	2.6184	0.377495	0.86352	0.171895	1.03626
815	FBgn0004512_Mdr49	0.889613	0.252558	0.896302	0.34938	0.795439	0.200286	0.738417	0.889613	0.117288	0.0512726	0.252558	1.33675	0.896302	0.585865	0.34938	1.514	0.795439	0.230084	0.074093	0.200286	1.28074	1.28729
816	FBgn0004513_Mdr65	0.546783	0.703416	0.440339	0.734013	0.442939	0.881725	0.969271	0.546783	0.612259	0.0565747	0.703416	0.799374	0.440339	1.07062	0.734013	1.162	0.442939	0.829941	0.0625395	0.881725	0.148782	1.059
817	FBgn0004514_Oct-TyrR	0.884968	0.0653972	0.98231	0.0790323	0.958498	0.0416855	0.225452	0.884968	0.122552	0.0401709	0.0653972	1.93493	0.98231	0.406232	0.0790323	2.19315	0.958498	0.0424298	0.0223344	0.0416855	2.03665	1.48513
818	FBgn0004516_Gad1	0.787503	0.525383	0.683406	0.839966	0.879523	0.879007	0.98857	0.787503	0.240221	0.0330544	0.525383	0.977104	0.683406	0.819047	0.839966	1.0933	0.879523	0.12876	0.0255621	0.879007	0.152229	1.0842
819	FBgn0004552_Akh	0.61279	0.00166285	0.99953	0.00192107	0.619229	0.418114	0.00993571	0.61279	0.495353	0.66159	0.00166285	3.73667	0.99953	0.235768	0.00192107	4.15178	0.619229	0.484662	0.22833	0.418114	-0.809697	0.560087
820	FBgn0004554_Edg91	0.0268637	0.644764	0.111835	0.3712	0.0268343	0.321273	0.150583	0.0268637	3.93903	0.66553	0.644764	0.85693	0.111835	1.69897	0.3712	1.48619	0.0268343	3.94033	0.632583	0.321273	-0.991845	0.841255
821	FBgn0004556_Dbp73D	0.472114	0.478712	0.646469	0.830158	0.389106	0.888975	0.948025	0.472114	0.763789	0.073776	0.478712	1.02722	0.646469	0.855256	0.830158	1.09939	0.389106	0.964931	0.0842416	0.888975	-0.139602	0.902227
822	FBgn0004567_slp2	0.127576	0.0767803	0.878359	0.168889	0.171215	0.0956869	0.380801	0.127576	2.16086	0.124861	0.0767803	1.86417	0.878359	0.609979	0.168889	1.84459	0.171215	1.83929	0.127522	0.0956869	1.66613	1.34487
823	FBgn0004569_aos	0.328247	0.0296839	0.977237	0.0474781	0.192483	0.0887098	0.165398	0.328247	1.14335	0.07552	0.0296839	2.28887	0.977237	0.425253	0.0474781	2.43327	0.192483	1.71253	0.0736154	0.0887098	1.70224	1.6275
824	FBgn0004573_5-HT7	0.904447	0.180441	0.935222	0.238459	0.920267	0.245954	0.696973	0.904447	0.100666	0.0232235	0.180441	1.48803	0.935222	0.524881	0.238459	1.68802	0.920267	0.0832517	0.0192589	0.245954	1.16023	1.32668
825	FBgn0004574_Rop	0.366665	0.18994	0.860591	0.321145	0.544208	0.222887	0.717445	0.366665	1.02708	0.0813355	0.18994	1.46519	0.860591	0.632307	0.321145	1.55256	0.544208	0.617114	0.0611783	0.222887	1.21889	1.4072
826	FBgn0004575_Syn	0.844267	0.351964	0.829198	0.517082	0.903283	0.347182	0.922598	0.844267	0.169955	0.0391405	0.351964	1.18155	0.829198	0.669062	0.517082	1.33191	0.903283	0.101961	0.0222004	0.347182	0.940069	1.15137
827	FBgn0004577_Pxd	0.00344817	0.0893586	0.407219	0.501604	0.0016229	0.303639	0.00969797	0.00344817	6.48783	0.672961	0.0893586	1.79747	0.407219	1.11012	0.501604	1.34625	0.0016229	7.48627	0.725801	0.303639	1.02866	1.26858
828	FBgn0004580_Cbp53E	0.196033	0.483923	0.499896	0.98341	0.151516	0.784588	0.626868	0.196033	1.69281	0.0740822	0.483923	1.0215	0.499896	1.00416	0.98341	1.00923	0.151516	1.97236	0.081117	0.784588	-0.273346	0.936358
829	FBgn0004581_bgcn	0.703767	0.31104	0.837429	0.46846	0.616377	0.280794	0.861605	0.703767	0.354194	0.255151	0.31104	1.24032	0.837429	0.659698	0.46846	1.37833	0.616377	0.489383	0.294404	0.280794	1.07854	1.18387
830	FBgn0004583_ex	0.287318	0.335371	0.704459	0.622911	0.307062	0.540536	0.868969	0.287318	1.28405	0.0728254	0.335371	1.20468	0.704459	0.798346	0.622911	1.24283	0.307062	1.21373	0.0667922	0.540536	0.612003	1.15919
831	FBgn0004584_Rrp1	0.916345	0.300697	0.870698	0.423104	0.927866	0.496268	0.883052	0.916345	0.0875404	0.0463214	0.300697	1.25618	0.870698	0.61977	0.423104	1.42576	0.927866	0.074999	0.0370622	0.496268	0.680374	1.15823
832	FBgn0004587_B52	0.0681329	0.0700968	0.83168	0.184974	0.0604146	0.135518	0.311954	0.0681329	2.86133	0.0826914	0.0700968	1.9043	0.83168	0.666256	0.184974	1.80327	0.0604146	2.99794	0.0900205	0.135518	1.49269	1.45683
833	FBgn0004588_Eig71Ea	NA	NA	NA	NA	NA	NA	1	NA	NA	NA	NA	NA	NA	NA	NA	NA	NA	NA	NA	NA	NA	NA
834	FBgn0004589_Eig71Eb	0.906787	0.760918	0.457355	0.692104	1	0.0951119	0.451004	0.906787	0.0980704	0.470088	0.760918	0.741861	0.457355	1.05109	0.692104	1.19126	1	0	7.55e-17	0.0951119	-1.66903	0.345715
835	FBgn0004590_Eig71Ec	NA	NA	NA	NA	NA	NA	1	NA	NA	NA	NA	NA	NA	NA	NA	NA	NA	NA	NA	NA	NA	NA
836	FBgn0004591_Eig71Ed	NA	NA	NA	NA	NA	NA	1	NA	NA	NA	NA	NA	NA	NA	NA	NA	NA	NA	NA	NA	NA	NA
837	FBgn0004592_Eig71Ee	NA	NA	NA	NA	NA	NA	1	NA	NA	NA	NA	NA	NA	NA	NA	NA	NA	NA	NA	NA	NA	NA
838	FBgn0004593_Eig71Ef	NA	NA	NA	NA	NA	NA	1	NA	NA	NA	NA	NA	NA	NA	NA	NA	NA	NA	NA	NA	NA	NA
839	FBgn0004594_Eig71Eg	NA	NA	NA	NA	NA	NA	1	NA	NA	NA	NA	NA	NA	NA	NA	NA	NA	NA	NA	NA	NA	NA
840	FBgn0004595_pros	0.8798	0.0281914	0.993765	0.0321825	0.829675	0.0265119	0.148894	0.8798	0.128442	0.0497481	0.0281914	2.31242	0.993765	0.341046	0.0321825	2.62114	0.829675	0.187535	0.0607565	0.0265119	2.21863	1.57028
841	FBgn0004597_CycC	0.92579	0.381193	0.819595	0.555606	0.905034	0.590973	0.943852	0.92579	0.0772461	0.0261717	0.381193	1.1428	0.819595	0.679785	0.555606	1.2978	0.905034	0.100015	0.0373012	0.590973	0.537427	1.09526
842	FBgn0004598_Fur2	0.661314	0.926838	0.160476	0.228469	0.285408	0.316956	0.649896	0.661314	0.417529	0.0410825	0.926838	0.539406	0.160476	1.54002	0.228469	1.70745	0.285408	1.29112	0.0607537	0.316956	-1.00073	0.697885
843	FBgn0004606_zfh1	0.817818	0.321838	0.846018	0.47001	0.904244	0.376826	0.902725	0.817818	0.20206	0.0448619	0.321838	1.22423	0.846018	0.649734	0.47001	1.37679	0.904244	0.100892	0.0345313	0.376826	0.883759	1.21137
844	FBgn0004607_zfh2	0.666444	0.00735702	0.997994	0.00866941	0.953569	0.0401724	0.0433382	0.666444	0.409653	0.0640326	0.00735702	2.95227	0.997994	0.287513	0.00866941	3.29224	0.953569	0.0475965	0.019773	0.0401724	2.05197	1.85011
845	FBgn0004611_Plc21C	0.168263	0.0117484	0.97955	0.0231085	0.0474967	0.0878012	0.0684524	0.168263	1.85818	0.0557512	0.0117484	2.72295	0.97955	0.416982	0.0231085	2.78483	0.0474967	3.27359	0.0642382	0.0878012	1.70711	1.62698
846	FBgn0004618_gl	0.884098	0.000483357	0.99995	0.000464608	0.751325	0.0089353	0.00278442	0.884098	0.123541	0.0353634	0.000483357	4.46483	0.99995	0.178679	0.000464608	5.0678	0.751325	0.287827	0.0449803	0.0089353	2.61452	2.38265
847	FBgn0004619_GluRIA	0.0156904	0.136376	0.525339	0.505442	0.000550739	0.979432	0.00329989	0.0156904	4.5833	0.126625	0.136376	1.6118	0.525339	0.977149	0.505442	1.34265	0.000550739	8.98052	0.119458	0.979432	-0.0257804	0.983975
848	FBgn0004620_GluRIIA	0.599746	0.0552004	0.977383	0.0746606	0.846129	0.104955	0.288724	0.599746	0.517376	0.0692991	0.0552004	2.01	0.977383	0.424746	0.0746606	2.21966	0.846129	0.167734	0.0440632	0.104955	1.62129	1.36143
849	FBgn0004622_TkR99D	0.140069	0.296589	0.638025	0.640176	0.0657203	0.362512	0.334939	0.140069	2.05827	0.111656	0.296589	1.2626	0.638025	0.863547	0.640176	1.22954	0.0657203	2.90221	0.125272	0.362512	0.910588	1.3663
850	FBgn0004623_Gbeta76C	0.0955813	6.03e-07	0.999894	1.4e-06	0.203652	0.000124208	3.62e-06	0.0955813	2.48076	0.112423	6.03e-07	10.171	0.999894	0.195549	1.4e-06	10.3181	0.203652	1.65172	0.102912	0.000124208	3.83767	3.44681
851	FBgn0004629_Cys	0.694823	0.00697015	0.998243	0.00806898	0.584598	0.0132211	0.0410989	0.694823	0.367199	0.116124	0.00697015	2.97923	0.998243	0.282125	0.00806898	3.33086	0.584598	0.54359	0.157566	0.0132211	2.47776	1.86461
852	FBgn0004635_rho	0.868488	0.0713	0.97982	0.0872796	0.849998	0.0985307	0.358417	0.868488	0.141465	0.0448686	0.0713	1.89679	0.97982	0.415973	0.0872796	2.14706	0.849998	0.163137	0.0550031	0.0985307	1.65202	1.50994
853	FBgn0004636_Rap1	0.90868	0.317339	0.859627	0.451041	0.892217	0.512351	0.898789	0.90868	0.0959754	0.0334943	0.317339	1.23088	0.859627	0.633483	0.451041	1.39603	0.892217	0.114349	0.0263976	0.512351	0.655182	1.10411
854	FBgn0004638_drk	0.722126	0.31456	0.837759	0.471584	0.693496	0.389106	0.896291	0.722126	0.328032	0.0306226	0.31456	1.23503	0.837759	0.659319	0.471584	1.37522	0.693496	0.369143	0.0359627	0.389106	0.861239	1.1356
855	FBgn0004643_Zw10	0.984028	0.140282	0.957362	0.176046	0.898339	0.13801	0.589782	0.984028	0.0161073	0.0226202	0.140282	1.59937	0.957362	0.480275	0.176046	1.82573	0.898339	0.107475	0.0737516	0.13801	1.48324	1.32941
856	FBgn0004644_hh	0.461052	0.0823409	0.953527	0.123885	0.267625	0.132276	0.402843	0.461052	0.788355	0.179269	0.0823409	1.83341	0.953527	0.48886	0.123885	1.98584	0.267625	1.35942	0.22714	0.132276	1.50519	1.5026
857	FBgn0004646_ogre	0.0530836	0.0105337	0.944246	0.0309824	0.0292035	0.0810486	0.061561	0.0530836	3.14578	0.0903091	0.0105337	2.77575	0.944246	0.507998	0.0309824	2.63974	0.0292035	3.8404	0.0921173	0.0810486	1.74463	1.58101
858	FBgn0004647_N	0.862793	0.0426668	0.989309	0.0503802	0.786656	0.0155181	0.0895703	0.862793	0.148088	0.034361	0.0426668	2.12488	0.989309	0.372361	0.0503802	2.40498	0.786656	0.241308	0.0446223	0.0155181	2.42006	1.59646
859	FBgn0004648_svr	0.896875	0.148214	0.949776	0.192145	0.832132	0.222243	0.61807	0.896875	0.109115	0.0195055	0.148214	1.57513	0.949776	0.496847	0.192145	1.786	0.832132	0.184552	0.0218212	0.222243	1.22058	1.31908
860	FBgn0004649_yl	0.754213	0.856453	0.293445	0.431406	1	0.228043	0.788379	0.754213	0.283938	0.969478	0.856453	0.637328	0.293445	1.26757	0.431406	1.41674	1	0	1.29e-16	0.228043	1.20542	2.85712
861	FBgn0004650_fs(1)N	0.867133	0.984813	0.0568205	0.0683754	0.863983	0.0480185	0.25566	0.867133	0.143036	0.126789	0.984813	0.395432	0.0568205	1.99716	0.0683754	2.26078	0.863983	0.1467	0.109599	0.0480185	-1.9772	0.701464
862	FBgn0004652_fru	0.0459486	0.296872	0.467889	0.803084	0.0158802	0.861832	0.0915776	0.0459486	3.31181	0.100121	0.296872	1.26216	0.467889	1.03924	0.803084	1.11646	0.0158802	4.56871	0.104447	0.861832	-0.174043	0.959553
863	FBgn0004654_Pgd	0.752784	0.0318583	0.991011	0.0386499	0.424205	0.0839097	0.176557	0.752784	0.285861	0.148382	0.0318583	2.25669	0.991011	0.361789	0.0386499	2.53212	0.424205	0.87487	0.253668	0.0839097	1.72844	1.50502
864	FBgn0004655_wapl	0.302782	0.323489	0.722825	0.592722	0.376505	0.456721	0.885128	0.302782	1.22856	0.133005	0.323489	1.22181	0.722825	0.780171	0.592722	1.26682	0.376505	0.999355	0.117794	0.456721	0.744258	1.15967
865	FBgn0004656_fs(1)h	0.970457	0.00427112	0.999477	0.00426803	0.973946	0.0335751	0.0253365	0.970457	0.0300089	0.0127465	0.00427112	3.22864	0.999477	0.239109	0.00426803	3.68334	0.973946	0.0264153	0.0121187	0.0335751	2.12514	1.92718
866	FBgn0004657_mys	0.108542	0.796859	0.127833	0.294231	0.139731	0.171696	0.498113	0.108542	2.33935	0.060245	0.796859	0.704444	0.127833	1.64025	0.294231	1.59249	0.139731	2.06092	0.0601993	0.171696	-1.36678	0.651749
867	FBgn0004666_sim	0.985782	0.183161	0.938828	0.23679	0.973997	0.190588	0.702957	0.985782	0.0143247	0.0168057	0.183161	1.48138	0.938828	0.518308	0.23679	1.69121	0.973997	0.0263633	0.0262097	0.190588	1.30884	1.26257
868	FBgn0004687_Mlc-c	0.859226	0.154436	0.944797	0.203542	0.95861	0.114428	0.51767	0.859226	0.15226	0.0418719	0.154436	1.55698	0.944797	0.506917	0.203542	1.75986	0.95861	0.0423129	0.017757	0.114428	1.5786	1.36869
869	FBgn0004698_Xpc	0.347822	0.449254	0.626202	0.819927	0.502045	0.968397	0.923052	0.347822	1.08243	0.090736	0.449254	1.06033	0.626202	0.87518	0.819927	1.10579	0.502045	0.700227	0.0769525	0.968397	0.039619	1.01318
870	FBgn0004777_Ccp84Ag	0.269196	0.0149502	0.985135	0.0250545	1	0.846535	0.0864144	0.269196	1.35319	1.23655	0.0149502	2.60769	0.985135	0.393953	0.0250545	2.74454	1	1.27e-14	8.14e-17	0.846535	-0.193541	0.913316
871	FBgn0004778_Ccp84Af	NA	NA	NA	NA	NA	NA	1	NA	NA	NA	NA	NA	NA	NA	NA	NA	NA	NA	NA	NA	NA	NA
872	FBgn0004779_Ccp84Ae	NA	NA	NA	NA	NA	NA	1	NA	NA	NA	NA	NA	NA	NA	NA	NA	NA	NA	NA	NA	NA	NA
873	FBgn0004780_Ccp84Ad	NA	NA	NA	NA	NA	NA	1	NA	NA	NA	NA	NA	NA	NA	NA	NA	NA	NA	NA	NA	NA	NA
874	FBgn0004781_Ccp84Ac	1	0.626385	0.626385	1	1	1	0.99728	1	0	4.05e-16	0.626385	0.875	0.626385	0.875	1	1	1	0	5.74e-17	1	8.63e-17	1
875	FBgn0004782_Ccp84Ab	NA	NA	NA	NA	NA	NA	1	NA	NA	NA	NA	NA	NA	NA	NA	NA	NA	NA	NA	NA	NA	NA
876	FBgn0004783_Ccp84Aa	NA	NA	NA	NA	NA	NA	1	NA	NA	NA	NA	NA	NA	NA	NA	NA	NA	NA	NA	NA	NA	NA
877	FBgn0004784_inaC	0.858987	0.379104	0.812299	0.561381	0.869594	0.428477	0.942705	0.858987	0.15254	0.0241289	0.379104	1.14549	0.812299	0.687802	0.561381	1.29286	0.869594	0.140184	0.0196602	0.428477	0.7918	1.07192
878	FBgn0004795_retn	0.128825	0.0150544	0.967271	0.0325937	0.161268	0.0661595	0.0869946	0.128825	2.15015	0.107769	0.0150544	2.60439	0.967271	0.455587	0.0325937	2.61493	0.161268	1.90436	0.0947807	0.0661595	1.83734	1.74308
879	FBgn0004797_mdy	0.0796304	0.0719931	0.843589	0.181563	0.0823895	0.220079	0.361285	0.0796304	2.68528	0.158255	0.0719931	1.89253	0.843589	0.652573	0.181563	1.81172	0.0823895	2.64699	0.148091	0.220079	1.22632	1.3387
880	FBgn0004811_fs(2)ltoPP43	0.230802	0.664093	0.344223	0.670618	0.218555	0.5044	0.772285	0.230802	1.51735	0.0692895	0.664093	0.837979	0.344223	1.19223	0.670618	1.2068	0.218555	1.57579	0.0682785	0.5044	-0.667582	0.840034
881	FBgn0004828_His3.3B	0.251487	0.988758	0.0100257	0.0170417	0.207123	0.0136447	0.0586665	0.251487	1.42564	0.103653	0.988758	0.375525	0.0100257	2.7998	0.0170417	2.93861	0.207123	1.63352	0.104747	0.0136447	-2.46648	0.547015
882	FBgn0004832_Xpac	0.447388	0.0396351	0.978248	0.0579038	0.752415	0.07634	0.215455	0.447388	0.819563	0.185641	0.0396351	2.15798	0.978248	0.421709	0.0579038	2.33898	0.752415	0.286357	0.105481	0.07634	1.77233	1.33494
883	FBgn0004837_Su(H)	0.983982	0.0767139	0.980852	0.090836	0.927809	0.0836211	0.380534	0.983982	0.0161542	0.0106333	0.0767139	1.86455	0.980852	0.412041	0.090836	2.12857	0.927809	0.0750599	0.0243756	0.0836211	1.73005	1.49433
884	FBgn0004838_Hrb27C	0.958847	0.0117163	0.998158	0.0123372	0.978208	0.0130242	0.0682705	0.958847	0.0420645	0.0213849	0.0117163	2.72427	0.998158	0.284029	0.0123372	3.10542	0.978208	0.0220444	0.0173748	0.0130242	2.48311	1.74771
885	FBgn0004839_otk	0.228363	0.337916	0.668673	0.659306	0.266876	0.629249	0.788906	0.228363	1.52872	0.192265	0.337916	1.20107	0.668673	0.833491	0.659306	1.21515	0.266876	1.3624	0.198172	0.629249	0.482785	1.0754
886	FBgn0004841_TkR86C	0.0343172	0.140273	0.630699	0.430809	0.0481496	0.229676	0.189026	0.0343172	3.65094	0.144301	0.140273	1.59939	0.630699	0.870751	0.430809	1.41738	0.0481496	3.25787	0.155478	0.229676	1.20119	1.16778
887	FBgn0004842_RYa-R	0.571238	0.00124226	0.999598	0.00146339	0.564638	0.00394451	0.00743044	0.571238	0.567304	0.200532	0.00124226	3.90174	0.999598	0.231037	0.00146339	4.31879	0.564638	0.579236	0.198962	0.00394451	2.88257	2.02904
888	FBgn0004852_Ac76E	0.170298	0.399173	0.562388	0.829402	0.205516	0.884433	0.673763	0.170298	1.84512	0.0655611	0.399173	1.12006	0.562388	0.938924	0.829402	1.09986	0.205516	1.6419	0.058791	0.884433	0.145352	1.01769
889	FBgn0004854_B-H2	0.757345	0.363039	0.808894	0.549261	0.760584	0.682392	0.933215	0.757345	0.279741	0.0745418	0.363039	1.16658	0.808894	0.691508	0.549261	1.30327	0.760584	0.275417	0.0669768	0.682392	0.409201	1.16719
890	FBgn0004855_RpII15	0.652503	0.20658	0.898691	0.302508	0.63892	0.18574	0.708539	0.652503	0.431207	0.0679401	0.20658	1.42764	0.898691	0.582508	0.302508	1.57985	0.63892	0.452676	0.0710067	0.18574	1.32329	1.33073
891	FBgn0004856_Bx42	0.877627	0.0413313	0.989953	0.0484206	0.964407	0.00988202	0.0578464	0.877627	0.13093	0.0858731	0.0413313	2.13915	0.989953	0.368517	0.0484206	2.42389	0.964407	0.0362723	0.0504982	0.00988202	2.57993	1.52376
892	FBgn0004858_elB	0.880533	0.971549	0.0944728	0.117915	0.440283	0.183061	0.448673	0.880533	0.127605	0.0343563	0.971549	0.443436	0.0944728	1.77303	0.117915	2.00846	0.440283	0.836189	0.0837738	0.183061	-1.33139	0.753313
893	FBgn0004859_ci	0.917394	0.0327176	0.992937	0.037171	0.924688	0.104804	0.180933	0.917394	0.0863915	0.0407664	0.0327176	2.24461	0.992937	0.347897	0.037171	2.551	0.924688	0.0784413	0.0227872	0.104804	1.622	1.60541
894	FBgn0004860_ph-d	0.772753	0.446456	0.747678	0.695162	0.846729	0.868671	0.971232	0.772753	0.259348	0.0587809	0.446456	1.06355	0.747678	0.755298	0.695162	1.18907	0.846729	0.167021	0.048507	0.868671	0.165347	1.03854
895	FBgn0004861_ph-p	0.85447	0.0465675	0.987932	0.0555	0.875786	0.0148919	0.0860903	0.85447	0.15785	0.062963	0.0465675	2.08573	0.987932	0.380062	0.0555	2.35903	0.875786	0.133043	0.0570808	0.0148919	2.435	1.57595
896	FBgn0004862_bap	0.738981	0.825366	0.335996	0.505532	0.746947	0.55599	0.914291	0.738981	0.304621	0.250207	0.825366	0.673367	0.335996	1.20379	0.505532	1.34257	0.746947	0.29375	0.197876	0.55599	-0.588809	0.84238
897	FBgn0004863_C15	0.470564	0.364368	0.747296	0.612621	0.479774	0.989388	0.934047	0.470564	0.767195	0.191519	0.364368	1.16481	0.747296	0.755683	0.612621	1.25089	0.479774	0.747128	0.168911	0.989388	0.0133009	1.00176
898	FBgn0004864_hop	0.625354	0.260362	0.860115	0.395003	0.783489	0.30356	0.836275	0.625354	0.4746	0.0651662	0.260362	1.32283	0.860115	0.632888	0.395003	1.45755	0.783489	0.245388	0.0510607	0.30356	1.02883	1.20603
899	FBgn0004865_Eip78C	0.819208	0.131161	0.95329	0.172401	0.815661	0.173851	0.569836	0.819208	0.200345	0.0577229	0.131161	1.62895	0.95329	0.489374	0.172401	1.83524	0.815661	0.204725	0.050216	0.173851	1.35993	1.36476
900	FBgn0004867_RpS2	0.792767	0.0173861	0.995938	0.0200201	0.850652	0.0129941	0.0754751	0.792767	0.233484	0.130714	0.0173861	2.5364	0.995938	0.319108	0.0200201	2.85686	0.850652	0.162362	0.129175	0.0129941	2.48393	1.70935
901	FBgn0004868_Gdi	0.695557	5.93e-05	0.99999	6.01e-05	0.799231	0.000547036	0.000355797	0.695557	0.366125	0.0337584	5.93e-05	5.89628	0.99999	0.14955	6.01e-05	6.60903	0.799231	0.225277	0.0263602	0.000547036	3.4566	2.60553
902	FBgn0004870_bab1	0.874641	0.407828	0.793776	0.608978	0.870938	0.707127	0.956879	0.874641	0.13436	0.0404746	0.407828	1.10938	0.793776	0.70772	0.608978	1.25378	0.870938	0.138629	0.0352684	0.707127	0.375718	1.07071
903	FBgn0004872_piwi	0.138109	0.406355	0.521842	0.87785	0.209324	0.704999	0.590065	0.138109	2.07372	0.245089	0.406355	1.11118	0.521842	0.980822	0.87785	1.07025	0.209324	1.62215	0.215404	0.704999	0.378582	1.11376
904	FBgn0004875_enc	0.498926	0.122043	0.932742	0.184013	0.285958	0.166198	0.542028	0.498926	0.706663	0.0368811	0.122043	1.66062	0.932742	0.529282	0.184013	1.80563	0.285958	1.28907	0.0439819	0.166198	1.38452	1.59542
905	FBgn0004876_cdi	0.0917171	0.264673	0.609731	0.62663	0.0986816	0.653833	0.43853	0.0917171	2.52684	0.0832696	0.264673	1.31529	0.609731	0.891454	0.62663	1.23994	0.0986816	2.44518	0.0764869	0.653833	0.448444	1.09858
906	FBgn0004878_cas	0.99081	0.841794	0.359332	0.510547	1	0.208053	0.753296	0.99081	0.00923406	0.123067	0.841794	0.65466	0.359332	1.17155	0.510547	1.33791	1	0	1.05e-16	0.208053	-1.25894	0.743587
907	FBgn0004880_scrt	0.973588	0.137845	0.95791	0.1732	0.970803	0.107075	0.493137	0.973588	0.026784	0.0271319	0.137845	1.60708	0.95791	0.479009	0.1732	1.83313	0.970803	0.0296526	0.0207947	0.107075	1.61148	1.36569
908	FBgn0004882_orb	0.447367	0.129017	0.921526	0.201448	0.443738	0.17166	0.563425	0.447367	0.819613	0.0779145	0.129017	1.6362	0.921526	0.548137	0.201448	1.76455	0.443738	0.82807	0.0725692	0.17166	1.36689	1.36224
909	FBgn0004885_tok	0.944135	0.506414	0.726945	0.776062	0.942964	0.872236	0.98554	0.944135	0.0575628	0.0247902	0.506414	0.997171	0.726945	0.776074	0.776062	1.13391	0.942964	0.0588076	0.0236806	0.872236	0.160819	1.13541
910	FBgn0004888_Scsalpha	0.526308	0.820184	0.290755	0.465409	0.740719	0.316067	0.872715	0.526308	0.651545	0.0563844	0.820184	0.679133	0.290755	1.27186	0.465409	1.38139	0.740719	0.302238	0.0411365	0.316067	-1.00257	0.867181
911	FBgn0004889_tws	0.518185	0.275564	0.829903	0.440325	0.516846	0.319274	0.855456	0.518185	0.667578	0.0437846	0.275564	1.29672	0.829903	0.668266	0.440325	1.40723	0.516846	0.670245	0.0425509	0.319274	0.995951	1.15843
912	FBgn0004892_sob	0.275175	0.561919	0.476867	0.912852	0.3386	0.625612	0.854989	0.275175	1.32986	0.274341	0.561919	0.9394	0.476867	1.02926	0.912852	1.04953	0.3386	1.11067	0.277082	0.625612	-0.487912	0.964134
913	FBgn0004893_bowl	0.54703	0.995039	0.0126497	0.0163855	0.367137	0.0282036	0.073538	0.54703	0.611795	0.0549183	0.995039	0.329055	0.0126497	2.6874	0.0163855	2.95867	0.367137	1.02574	0.0856872	0.0282036	-2.19444	0.58192
914	FBgn0004895_FoxL1	NA	NA	NA	NA	NA	NA	1	NA	NA	NA	NA	NA	NA	NA	NA	NA	NA	NA	NA	NA	NA	NA
915	FBgn0004896_fd59A	0.347201	0.0859868	0.937173	0.141229	0.549778	0.193792	0.416938	0.347201	1.08431	0.106496	0.0859868	1.81437	0.937173	0.521352	0.141229	1.926	0.549778	0.606642	0.07303	0.193792	1.29944	1.51179
916	FBgn0004897_fd96Ca	0.17971	0.0806062	0.900358	0.160516	0.46169	0.283075	0.396038	0.17971	1.78678	0.506158	0.0806062	1.84277	0.900358	0.580142	0.160516	1.8677	0.46169	0.78692	0.370963	0.283075	1.07344	1.24008
917	FBgn0004898_fd96Cb	0.807865	0.161166	0.938255	0.21709	0.728614	0.242429	0.651618	0.807865	0.214422	0.123597	0.161166	1.53812	0.938255	0.519367	0.21709	1.73062	0.728614	0.318954	0.147653	0.242429	1.16894	1.2895
918	FBgn0004901_Prat	0.783152	0.199796	0.916101	0.277745	0.969472	0.225168	0.737454	0.783152	0.245823	0.0667097	0.199796	1.4426	0.916101	0.556729	0.277745	1.61874	0.969472	0.0310257	0.0245423	0.225168	1.2129	1.23719
919	FBgn0004903_Rb97D	0.904056	0.745167	0.476656	0.727622	0.915608	0.699577	0.979454	0.904056	0.101101	0.039302	0.745167	0.757829	0.476656	1.02949	0.727622	1.16638	0.915608	0.0883484	0.0378974	0.699577	-0.385891	0.764703
920	FBgn0004907_14-3-3zeta	0.251383	0.450239	0.573578	0.873238	0.21017	0.885012	0.757226	0.251383	1.42608	0.0574937	0.450239	1.0592	0.573578	0.927586	0.873238	1.07302	0.21017	1.61782	0.0665324	0.885012	0.144618	1.02475
921	FBgn0004908_Arl2	0.0906071	0.0473202	0.894748	0.115284	0.0311409	0.176835	0.172889	0.0906071	2.54045	0.128746	0.0473202	2.07857	0.894748	0.588028	0.115284	2.01881	0.0311409	3.76481	0.158932	0.176835	1.35057	1.40459
922	FBgn0004910_Eip63F-1	0.226199	0.667122	0.338062	0.660924	0.151639	0.725798	0.627192	0.226199	1.53892	0.113594	0.667122	0.835011	0.338062	1.20087	0.660924	1.21395	0.151639	1.97147	0.123469	0.725798	-0.350721	0.930514
923	FBgn0004911_Eig63F-2	0.685883	0.286237	0.851728	0.429243	0.833842	0.887114	0.867771	0.685883	0.380373	0.19809	0.286237	1.27914	0.851728	0.642989	0.429243	1.41907	0.833842	0.182482	0.119975	0.887114	0.141956	1.05279
924	FBgn0004913_Gnf1	0.233342	0.808223	0.196248	0.373057	0.404752	0.561612	0.730392	0.233342	1.50563	0.101619	0.808223	0.692235	0.196248	1.45061	0.373057	1.48389	0.404752	0.923776	0.0809067	0.561612	-0.580448	0.699033
925	FBgn0004914_Hnf4	0.330805	0.481382	0.58727	0.89209	0.413496	0.734091	0.910192	0.330805	1.13518	0.0387508	0.481382	1.02428	0.58727	0.913821	0.89209	1.06175	0.413496	0.901494	0.0335206	0.734091	0.339689	1.05476
926	FBgn0004915_TfIIB	0.5152	0.651835	0.487671	0.833921	0.453656	0.583238	0.973405	0.5152	0.673535	0.0668746	0.651835	0.849994	0.487671	1.0174	0.833921	1.09705	0.453656	0.805124	0.0621131	0.583238	-0.548662	0.789227
927	FBgn0004919_gol	3.2e-05	0.045312	0.0832289	0.829838	7.67e-06	0.695906	4.6e-05	3.2e-05	13.2924	0.318599	0.045312	2.09795	0.0832289	1.82869	0.829838	1.09959	7.67e-06	15.6836	0.316857	0.695906	-0.390853	0.907639
928	FBgn0004921_Ggamma1	0.989672	0.20053	0.93094	0.261852	0.986267	0.105278	0.486987	0.989672	0.0103845	0.0147629	0.20053	1.44096	0.93094	0.532423	0.261852	1.64553	0.986267	0.0138322	0.0211649	0.105278	1.61979	1.32531
929	FBgn0004924_Top1	0.423767	0.899167	0.155492	0.249602	0.476433	0.210857	0.637238	0.423767	0.875945	0.0530962	0.899167	0.581833	0.155492	1.55397	0.249602	1.66729	0.476433	0.754361	0.0443847	0.210857	-1.25121	0.752739
930	FBgn0004926_eIF2beta	0.809763	0.0408979	0.988973	0.0491816	0.829768	0.0162902	0.0938463	0.809763	0.212052	0.0646637	0.0408979	2.14388	0.988973	0.374302	0.0491816	2.41645	0.829768	0.187421	0.0697829	0.0162902	2.40235	1.59223
931	FBgn0004956_upd1	0.388557	0.586039	0.509417	0.922191	1	0.449343	0.947744	0.388557	0.966406	0.882772	0.586039	0.915055	0.509417	0.993969	0.922191	1.04408	1	0	9.02e-17	0.449343	0.756511	1.23161
932	FBgn0004957_por	0.492342	0.329473	0.781974	0.542624	0.35839	0.460164	0.909114	0.492342	0.720388	0.0983248	0.329473	1.21312	0.781974	0.720136	0.542624	1.30905	0.35839	1.05102	0.0893545	0.460164	0.738577	1.23976
933	FBgn0004959_phm	0.861879	0.390816	0.80434	0.581216	0.334669	0.942715	0.913259	0.861879	0.149155	0.239824	0.390816	1.13053	0.80434	0.696432	0.581216	1.27624	0.334669	1.12296	0.489908	0.942715	0.0718583	1.05746
934	FBgn0005198_gig	0.893244	0.104673	0.968017	0.13129	0.870344	0.102004	0.47562	0.893244	0.113192	0.0454113	0.104673	1.72802	0.968017	0.453545	0.13129	1.9593	0.870344	0.139317	0.0405581	0.102004	1.63521	1.55411
935	FBgn0005278_Sam-S	0.485881	0.744628	0.372693	0.623834	0.293651	0.721929	0.875802	0.485881	0.734044	0.0591146	0.744628	0.758372	0.372693	1.15383	0.623834	1.24211	0.293651	1.26095	0.0739113	0.721929	0.355882	1.20157
936	FBgn0005322_nmd	0.520204	0.572234	0.572099	0.999863	0.530293	0.906128	0.987801	0.520204	0.663568	0.0731451	0.572234	0.928943	0.572099	0.92908	0.999863	1.00008	0.530293	0.643777	0.0784939	0.906128	-0.117924	0.970171
937	FBgn0005355_Su(fu)	0.817347	0.0714251	0.978307	0.0891356	0.75892	0.0295882	0.164904	0.817347	0.20264	0.097901	0.0714251	1.89602	0.978307	0.421498	0.0891356	2.13731	0.75892	0.277636	0.129621	0.0295882	2.17556	1.45585
938	FBgn0005386_ash1	0.828564	0.943349	0.15353	0.204314	0.960702	0.192725	0.632151	0.828564	0.188886	0.032286	0.943349	0.509745	0.15353	1.55958	0.204314	1.75814	0.960702	0.0401282	0.0170335	0.192725	-1.30256	0.799849
939	FBgn0005390_fs(1)M3	0.401418	0.50247	0.598066	0.902981	0.252253	0.346763	0.825205	0.401418	0.932404	0.203585	0.50247	1.00139	0.598066	0.90304	0.902981	1.05532	0.252253	1.4224	0.206486	0.346763	-0.940886	0.828078
940	FBgn0005391_Yp2	0.669925	1.27e-05	0.999997	1.27e-05	0.54909	0.00799716	7.61e-05	0.669925	0.404344	0.207866	1.27e-05	7.13581	0.999997	0.12808	1.27e-05	7.98621	0.54909	0.607929	0.179066	0.00799716	2.65219	2.57129
941	FBgn0005411_U2af50	0.259234	0.172322	0.841807	0.317212	0.313452	0.252878	0.67851	0.259234	1.39331	0.107629	0.172322	1.50848	0.841807	0.654644	0.317212	1.55819	0.313452	1.19198	0.103517	0.252878	1.14339	1.24902
942	FBgn0005427_ewg	0.0569725	0.470407	0.324039	0.834693	0.0768104	0.972745	0.296691	0.0569725	3.06487	0.102754	0.470407	1.03643	0.324039	1.22101	0.834693	1.09657	0.0768104	2.72587	0.0912345	0.972745	0.0341662	1.00348
943	FBgn0005533_RpS17	0.744822	0.0400815	0.988012	0.0494968	0.792463	0.0232159	0.131456	0.744822	0.296638	0.12619	0.0400815	2.15294	0.988012	0.379633	0.0494968	2.41341	0.792463	0.233873	0.122255	0.0232159	2.26986	1.6121
944	FBgn0005536_Mbs	0.519853	0.949419	0.0981649	0.144056	0.439836	0.04098	0.222025	0.519853	0.664264	0.0648647	0.949419	0.497588	0.0981649	1.7562	0.144056	1.91696	0.439836	0.837245	0.0702142	0.04098	-2.04373	0.70936
945	FBgn0005558_ey	0.311521	0.10662	0.914364	0.182632	0.424632	0.267894	0.491585	0.311521	1.1985	0.0907786	0.10662	1.71994	0.914364	0.559417	0.182632	1.80905	0.424632	0.873823	0.0799428	0.267894	1.10792	1.34002
946	FBgn0005561_sv	0.21831	0.00245046	0.995931	0.0042704	0.545968	0.0231018	0.014613	0.21831	1.57699	0.135781	0.00245046	3.5232	0.995931	0.319183	0.0042704	3.68302	0.545968	0.613793	0.0797556	0.0231018	2.27175	1.85567
947	FBgn0005564_Shal	0.63648	0.394243	0.763252	0.627135	0.395473	0.591502	0.950593	0.63648	0.456583	0.0605689	0.394243	1.12622	0.763252	0.739476	0.627135	1.23955	0.395473	0.947977	0.0759603	0.591502	0.536661	1.16305
948	FBgn0005585_Calr	0.642524	0.555784	0.622968	0.932053	0.487701	0.904858	0.981922	0.642524	0.446934	0.0872478	0.555784	0.945655	0.622968	0.878368	0.932053	1.03838	0.487701	0.730178	0.115485	0.904858	0.119527	1.05254
949	FBgn0005586_Rab3	0.528931	0.140727	0.924563	0.210896	0.661143	0.150717	0.597481	0.528931	0.646424	0.0578644	0.140727	1.59797	0.924563	0.543185	0.210896	1.74376	0.661143	0.417793	0.0446194	0.150717	1.437	1.31153
950	FBgn0005590_scw	0.356986	0.849669	0.200288	0.342155	0.221963	0.374827	0.738421	0.356986	1.05513	0.457601	0.849669	0.645432	0.200288	1.4415	0.342155	1.52358	0.221963	1.55919	0.566147	0.374827	-0.887469	0.838004
951	FBgn0005593_RpL7	0.818057	0.0681441	0.979564	0.0847081	0.929649	0.0468633	0.250225	0.818057	0.201764	0.1437	0.0681441	1.91676	0.979564	0.416931	0.0847081	2.16092	0.929649	0.0730726	0.0776992	0.0468633	1.98753	1.44335
952	FBgn0005596_yem	0.887039	0.461688	0.754501	0.703102	0.891365	0.643897	0.975667	0.887039	0.120201	0.0512509	0.461688	1.0462	0.754501	0.748392	0.703102	1.18345	0.891365	0.115309	0.0458809	0.643897	0.462256	1.15489
953	FBgn0005612_Sox14	0.163409	0.593565	0.362082	0.757675	0.307894	0.606965	0.657171	0.163409	1.89	0.0830953	0.593565	0.907528	0.362082	1.16786	0.757675	1.14605	0.307894	1.21087	0.0683459	0.606965	-0.51441	0.962824
954	FBgn0005613_Sox15	0.46106	0.387178	0.725	0.658095	0.406045	0.762524	0.947033	0.46106	0.788336	0.121631	0.387178	1.13514	0.725	0.778009	0.658095	1.21605	0.406045	0.92045	0.12007	0.762524	0.302169	1.06192
955	FBgn0005614_trpl	0.158763	0.0608642	0.914434	0.125141	0.158042	0.0308835	0.17157	0.158763	1.92141	0.19536	0.0608642	1.9667	0.914434	0.559311	0.125141	1.98123	0.158042	1.92636	0.201802	0.0308835	2.15857	1.42197
956	FBgn0005616_msl-2	0.119932	0.0136564	0.967485	0.0302827	0.0420364	0.0462638	0.0791915	0.119932	2.22896	0.0902979	0.0136564	2.65076	0.967485	0.455004	0.0302827	2.65094	0.0420364	3.41471	0.093715	0.0462638	1.99298	1.60209
957	FBgn0005617_msl-1	0.835922	0.961605	0.114355	0.147506	0.625286	0.0824593	0.403306	0.835922	0.179969	0.0284055	0.961605	0.470201	0.114355	1.68919	0.147506	1.90618	0.625286	0.474711	0.0483299	0.0824593	-1.73659	0.740795
958	FBgn0005619_Hdc	0.719585	0.000771995	0.999856	0.00081789	0.920232	0.00314579	0.00462304	0.719585	0.331612	0.0664301	0.000771995	4.17985	0.999856	0.202972	0.00081789	4.68923	0.920232	0.0832909	0.0366185	0.00314579	2.95312	2.16819
959	FBgn0005624_Psc	0.156059	0.137014	0.825291	0.28647	0.242372	0.192177	0.586932	0.156059	1.94013	0.148472	0.137014	1.60974	0.825291	0.67345	0.28647	1.60466	0.242372	1.46504	0.133299	0.192177	1.30417	1.27337
960	FBgn0005626_ple	0.455363	0.805879	0.28778	0.476189	0.331324	0.574578	0.869477	0.455363	0.801229	0.100616	0.805879	0.694772	0.28778	1.27664	0.476189	1.37067	0.331324	1.13353	0.112418	0.574578	-0.561322	0.887064
961	FBgn0005631_robo1	0.150693	0.0291643	0.951867	0.0603299	0.13737	0.0690604	0.162713	0.150693	1.9783	0.077225	0.0291643	2.29693	0.951867	0.492441	0.0603299	2.31961	0.13737	2.0796	0.0793964	0.0690604	1.81802	1.71285
962	FBgn0005632_faf	0.77398	0.760158	0.431094	0.667024	0.763418	0.57743	0.966096	0.77398	0.257743	0.0403292	0.760158	0.742636	0.431094	1.08144	0.667024	1.20944	0.763418	0.271651	0.0384691	0.57743	-0.557142	0.867752
963	FBgn0005633_fln	0.508359	0.993609	0.0145295	0.0194318	0.939385	0.83204	0.084071	0.508359	0.687326	0.448438	0.993609	0.342386	0.0145295	2.62125	0.0194318	2.87193	0.939385	0.0626206	0.076241	0.83204	0.212086	1.04168
964	FBgn0005636_nvy	0.421988	0.880954	0.179926	0.292116	0.542029	0.210002	0.695829	0.421988	0.880322	0.113396	0.880954	0.6066	0.179926	1.4893	0.292116	1.59578	0.542029	0.621242	0.103221	0.210002	-1.25356	0.700191
965	FBgn0005638_slbo	0.0719442	0.567318	0.269683	0.671628	0.0408479	0.56446	0.221381	0.0719442	2.79973	0.497521	0.567318	0.933918	0.269683	1.30667	0.671628	1.20606	0.0408479	3.44797	0.482671	0.56446	-0.57623	0.905267
966	FBgn0005640_Eip63E	0.756608	0.228226	0.897349	0.325036	0.730944	0.529269	0.788681	0.756608	0.280727	0.0364398	0.228226	1.38278	0.897349	0.584398	0.325036	1.54706	0.730944	0.315714	0.0405359	0.529269	0.629122	1.25673
967	FBgn0005642_wdn	0.719566	0.0624861	0.9787	0.0803904	0.593764	0.0249504	0.140669	0.719566	0.331639	0.111636	0.0624861	1.95506	0.9787	0.42009	0.0803904	2.18522	0.593764	0.527644	0.127268	0.0249504	2.24217	1.60233
968	FBgn0005648_Pabp2	0.617385	0.273213	0.850006	0.418043	0.638446	0.408035	0.852618	0.617385	0.487713	0.047041	0.273213	1.30068	0.850006	0.645033	0.418043	1.43134	0.638446	0.453434	0.046144	0.408035	0.827356	1.15938
969	FBgn0005649_Rox8	0.743164	1.75e-05	0.999998	1.68e-05	0.826384	0.00255421	0.000100934	0.743164	0.298897	0.0329536	1.75e-05	6.86399	0.999998	0.127033	1.68e-05	7.72328	0.826384	0.191544	0.0266493	0.00255421	3.01684	2.8467
970	FBgn0005654_Orc3	0.805092	0.0943833	0.96872	0.121055	0.992437	0.214034	0.448346	0.805092	0.217896	0.0828336	0.0943833	1.77344	0.96872	0.451593	0.121055	1.99642	0.992437	0.00759309	0.0136544	0.214034	1.24255	1.29253
971	FBgn0005655_PCNA	0.524125	0.22158	0.870198	0.345788	0.643251	0.588326	0.777523	0.524125	0.65583	0.360342	0.22158	1.39612	0.870198	0.620401	0.345788	1.51874	0.643251	0.445779	0.212704	0.588326	0.541264	1.10411
972	FBgn0005658_Ets65A	0.109751	0.204568	0.704961	0.467691	0.100991	0.722962	0.472061	0.109751	2.32707	0.111923	0.204568	1.43203	0.704961	0.79785	0.467691	1.3791	0.100991	2.41943	0.105918	0.722962	0.354503	1.10548
973	FBgn0005659_Ets98B	0.0230703	0.000167826	0.98684	0.000710724	0.00653809	0.00305803	0.00100654	0.0230703	4.11979	0.115651	0.000167826	5.15316	0.98684	0.385729	0.000710724	4.78149	0.00653809	5.66723	0.132232	0.00305803	2.96184	2.31156
974	FBgn0005660_Ets21C	0.937345	0.721848	0.51124	0.786161	0.820278	0.819962	0.986368	0.937345	0.0648015	0.0407637	0.721848	0.781142	0.51124	0.99203	0.786161	1.12734	0.820278	0.199027	0.0679852	0.819962	0.227594	1.07581
975	FBgn0005664_Crys	0.0394168	0.428812	0.311348	0.862526	0.041702	0.794389	0.214385	0.0394168	3.48939	0.411883	0.428812	1.08413	0.311348	1.23986	0.862526	1.07949	0.041702	3.42397	0.377657	0.794389	-0.260616	0.893055
976	FBgn0005666_bt	0.270994	0.232551	0.791665	0.429174	0.412961	0.161016	0.651243	0.270994	1.34612	0.16087	0.232551	1.37428	0.791665	0.709955	0.429174	1.41915	0.412961	0.902843	0.156726	0.161016	1.40166	1.3042
977	FBgn0005670_Cyp4d1	0.480182	0.00440315	0.997974	0.00576069	0.640376	0.000369392	0.00221431	0.480182	0.746249	0.226644	0.00440315	3.21286	0.997974	0.287935	0.00576069	3.51513	0.640376	0.450352	0.1924	0.000369392	3.56104	1.83793
978	FBgn0005671_Vha55	0.0151245	0.00060179	0.965105	0.0029564	0.00516502	0.00395141	0.00360531	0.0151245	4.6279	0.0622785	0.00060179	4.33002	0.965105	0.461351	0.0029564	3.89495	0.00516502	5.96675	0.0664271	0.00395141	2.88201	2.03319
979	FBgn0005672_spi	0.33757	0.000694567	0.99933	0.000996697	0.371392	0.038017	0.00416017	0.33757	1.11388	0.0809032	0.000694567	4.24318	0.99933	0.247105	0.000996697	4.56123	0.371392	1.01367	0.0682678	0.038017	2.07467	2.21011
980	FBgn0005674_GluProRS	0.367273	0.525435	0.561096	0.963744	0.33481	0.638003	0.913369	0.367273	1.02535	0.084889	0.525435	0.977049	0.561096	0.940238	0.963744	1.02028	0.33481	1.12251	0.0888904	0.638003	-0.470493	0.905403
981	FBgn0005677_dac	0.634825	0.321017	0.818917	0.497302	0.631095	0.346619	0.902016	0.634825	0.459242	0.0694906	0.321017	1.22544	0.818917	0.680535	0.497302	1.3503	0.631095	0.465261	0.0716564	0.346619	0.941168	1.29969
982	FBgn0005683_pie	0.810865	0.236977	0.89776	0.333	0.849238	0.6993	0.802656	0.810865	0.21068	0.0951861	0.236977	1.36574	0.89776	0.583821	0.333	1.53599	0.849238	0.164038	0.0839857	0.6993	0.386266	1.22046
983	FBgn0005694_Aef1	0.523707	0.0294066	0.986888	0.0401745	0.424382	0.0743847	0.163966	0.523707	0.656651	0.0706335	0.0294066	2.29315	0.986888	0.385486	0.0401745	2.51344	0.424382	0.874435	0.070318	0.0743847	1.78424	1.74764
984	FBgn0005695_gcl	0.408697	0.111332	0.928088	0.176742	0.355206	0.100446	0.470138	0.408697	0.913661	0.0634996	0.111332	1.70095	0.928088	0.537302	0.176742	1.82394	0.355206	1.06038	0.067688	0.100446	1.64269	1.363
985	FBgn0005696_DNApol-alpha73	0.869401	0.00309547	0.999551	0.00318528	0.856348	0.0348431	0.0184297	0.869401	0.140407	0.116534	0.00309547	3.39775	0.999551	0.234385	0.00318528	3.85145	0.856348	0.155639	0.12097	0.0348431	2.11018	1.87696
986	FBgn0005771_noc	0.986609	0.403037	0.811896	0.584952	0.977519	0.452968	0.954743	0.986609	0.0134856	0.0113675	0.403037	1.11527	0.811896	0.688242	0.584952	1.27317	0.977519	0.0227496	0.0140573	0.452968	0.750476	1.16166
987	FBgn0005775_Con	0.322036	0.00962598	0.992102	0.0149518	0.448117	0.0304152	0.0563837	0.322036	1.16348	0.0850729	0.00962598	2.81965	0.992102	0.354219	0.0149518	3.00569	0.448117	0.817873	0.0612392	0.0304152	2.16464	1.86247
988	FBgn0005777_PpD3	0.657486	0.706937	0.467568	0.757978	0.570099	0.732419	0.977218	0.657486	0.423448	0.0412794	0.706937	0.795901	0.467568	1.0396	0.757978	1.14585	0.570099	0.569353	0.0367125	0.732419	-0.34191	0.916494
989	FBgn0005778_PpD5	0.587636	0.0010777	0.999673	0.00125039	1	0.0736632	0.00644883	0.587636	0.538276	1.19838	0.0010777	3.98365	0.999673	0.224959	0.00125039	4.41712	1	0	2.99e-16	0.0736632	-1.7887	0.139886
990	FBgn0005779_PpD6	NA	NA	NA	NA	NA	NA	1	NA	NA	NA	NA	NA	NA	NA	NA	NA	NA	NA	NA	NA	NA	NA
991	FBgn0008635_betaCOP	0.98946	0.0839231	0.978599	0.0999881	0.996103	0.00857159	0.05034	0.98946	0.010599	0.0239393	0.0839231	1.82504	0.978599	0.420455	0.0999881	2.08424	0.996103	0.00390479	0.0115192	0.00857159	2.62868	1.42066
992	FBgn0008636_hbn	0.273824	0.878738	0.136917	0.245934	0.134832	0.377077	0.580626	0.273824	1.33508	0.126766	0.878738	0.609488	0.136917	1.61005	0.245934	1.67401	0.134832	2.10006	0.159091	0.377077	-0.883295	0.794052
993	FBgn0008646_E5	0.298036	0.0495175	0.958563	0.0832763	0.216503	0.150351	0.262665	0.298036	1.24527	0.318447	0.0495175	2.05833	0.958563	0.477489	0.0832763	2.16883	0.216503	1.58592	0.335438	0.150351	1.43829	1.54903
994	FBgn0008651_lbl	0.221857	0.281322	0.719758	0.548525	0.170575	0.424798	0.674417	0.221857	1.5597	0.183364	0.281322	1.28716	0.719758	0.783216	0.548525	1.30391	0.170575	1.84336	0.207341	0.424798	0.798125	1.13447
995	FBgn0010014_CanB	0.339081	0.000270608	0.999706	0.00038116	0.23447	0.0040035	0.00162255	0.339081	1.10918	0.0680831	0.000270608	4.83435	0.999706	0.221926	0.00038116	5.20486	0.23447	1.50047	0.068031	0.0040035	2.87789	2.2534
996	FBgn0010015_CanA1	0.0392348	0.0184005	0.90096	0.0593325	0.0369217	0.0121617	0.0707875	0.0392348	3.49477	0.205583	0.0184005	2.5098	0.90096	0.579282	0.0593325	2.32747	0.0369217	3.56551	0.200384	0.0121617	2.50742	1.47984
997	FBgn0010019_Cyp4g1	0.0501833	0.0600457	0.819691	0.173751	0.326991	0.685014	0.265759	0.0501833	3.21027	1.49728	0.0600457	1.97269	0.819691	0.67968	0.173751	1.83169	0.326991	1.14739	0.674072	0.685014	0.405631	1.18012
998	FBgn0010038_GstD2	0.709838	0.0552473	0.981335	0.0707832	0.754722	0.0343436	0.189159	0.709838	0.345464	0.137026	0.0552473	2.00962	0.981335	0.410152	0.0707832	2.24457	0.754722	0.283255	0.157009	0.0343436	2.11601	1.46648
999	FBgn0010039_GstD3	0.398697	0.041452	0.97415	0.0630176	0.599583	0.0749844	0.224319	0.398697	0.939501	0.0843618	0.041452	2.13784	0.97415	0.435453	0.0630176	2.29908	0.599583	0.517654	0.0696939	0.0749844	1.78056	1.62571
1000	FBgn0010040_GstD4	0.0805432	0.774595	0.118887	0.296385	0.245072	0.638343	0.39579	0.0805432	2.67246	1.0109	0.774595	0.727806	0.118887	1.67213	0.296385	1.58917	0.245072	1.45321	0.675862	0.638343	-0.470016	0.854105
1001	FBgn0010041_GstD5	0.660597	0.541344	0.641169	0.899036	0.868819	0.822248	0.990691	0.660597	0.418635	0.376362	0.541344	0.960493	0.641169	0.860459	0.899036	1.05764	0.868819	0.141081	0.196984	0.822248	0.224655	1.04003
1002	FBgn0010042_GstD6	0.0182091	0.559604	0.128897	0.464336	0.0105168	0.371788	0.0614651	0.0182091	4.40331	0.981456	0.559604	0.941757	0.128897	1.63661	0.464336	1.38247	0.0105168	5.0732	1.03295	0.371788	-0.893129	0.842775
1003	FBgn0010043_GstD7	0.818617	0.949952	0.13831	0.182773	1	0.869688	0.590639	0.818617	0.201073	0.426091	0.949952	0.49648	0.13831	1.6056	0.182773	1.8087	1	0	2.9e-16	0.869688	0.164054	1.05527
1004	FBgn0010044_GstD8	0.987233	0.719162	0.523436	0.801044	0.981263	0.866177	0.988285	0.987233	0.0128535	0.0135062	0.719162	0.783808	0.523436	0.979146	0.801044	1.11776	0.981263	0.018923	0.0207346	0.866177	-0.168516	0.939483
1005	FBgn0010051_Itp-r83A	0.42914	0.00376461	0.997908	0.00511588	0.616559	0.0102753	0.0223761	0.42914	0.862836	0.0556152	0.00376461	3.29444	0.997908	0.289251	0.00511588	3.58122	0.616559	0.489081	0.045862	0.0102753	2.56643	1.96482
1006	FBgn0010052_Jhe	0.0418974	0.66966	0.133148	0.39075	0.0223686	0.449375	0.126926	0.0418974	3.41855	0.304826	0.66966	0.832524	0.133148	1.62234	0.39075	1.46255	0.0223686	4.15662	0.341636	0.449375	-0.756457	0.777233
1007	FBgn0010053_Jheh1	0.887871	0.769911	0.442127	0.667703	0.699092	0.676089	0.969855	0.887871	0.119258	0.0410594	0.769911	0.732641	0.442127	1.06855	0.667703	1.20894	0.699092	0.36097	0.074489	0.676089	-0.417806	0.897611
1008	FBgn0010078_RpL23	0.754649	0.110937	0.959063	0.147107	0.767876	0.23732	0.506149	0.754649	0.283353	0.142931	0.110937	1.70251	0.959063	0.476315	0.147107	1.90741	0.767876	0.265757	0.14147	0.23732	1.18171	1.30487
1009	FBgn0010097_gammaTub37C	0.0809682	0.203437	0.664044	0.499521	0.0713972	0.673358	0.35882	0.0809682	2.66654	1.15877	0.203437	1.43451	0.664044	0.838027	0.499521	1.34821	0.0713972	2.80836	0.779704	0.673358	0.421544	1.22372
1010	FBgn0010100_Acon	0.906766	0.0291515	0.993779	0.0330042	0.84028	0.0113087	0.0659626	0.906766	0.0980945	0.0441948	0.0291515	2.29713	0.993779	0.340923	0.0330042	2.60882	0.84028	0.174727	0.0712495	0.0113087	2.53301	1.59011
1011	FBgn0010105_comm	0.30481	0.0663046	0.945887	0.111985	0.390999	0.0736998	0.337431	0.30481	1.2215	0.0966624	0.0663046	1.92884	0.945887	0.504759	0.111985	2.03213	0.390999	0.959859	0.099666	0.0736998	1.78847	1.54973
1012	FBgn0010109_dpn	0.447362	0.143579	0.911552	0.225822	0.369529	0.212674	0.605431	0.447362	0.819624	0.415887	0.143579	1.58913	0.911552	0.563711	0.225822	1.71273	0.369529	1.01893	0.520721	0.212674	1.24625	1.2387
1013	FBgn0010113_hdc	0.997555	0.0406948	0.991721	0.0456248	0.984486	0.0166288	0.0957161	0.997555	0.0024483	0.00687364	0.0406948	2.14612	0.991721	0.356947	0.0456248	2.45231	0.984486	0.0156409	0.0177041	0.0166288	2.39481	1.52407
1014	FBgn0010114_hig	0.157707	0.0215296	0.964065	0.0436876	0.184815	0.0074167	0.0436832	0.157707	1.92868	0.0695523	0.0215296	2.43658	0.964065	0.464037	0.0436876	2.47311	0.184815	1.75646	0.0669808	0.0074167	2.67753	1.74664
1015	FBgn0010173_RpA-70	0.961434	0.492146	0.741293	0.746944	0.763736	0.950411	0.982843	0.961434	0.0393657	0.014705	0.492146	1.01253	0.741293	0.761727	0.746944	1.15323	0.763736	0.27123	0.0398767	0.950411	-0.0621904	0.976568
1016	FBgn0010194_Wnt5	0.0855645	0.00540875	0.976828	0.0134777	0.0769549	0.0478745	0.0320168	0.0855645	2.60456	0.121193	0.00540875	3.10724	0.976828	0.426654	0.0134777	3.05937	0.0769549	2.72375	0.122525	0.0478745	1.97848	1.72469
1017	FBgn0010197_Gyc32E	0.0377161	0.472153	0.267438	0.759915	0.0286744	0.729278	0.160175	0.0377161	3.5407	0.202506	0.472153	1.03448	0.267438	1.31052	0.759915	1.14456	0.0286744	3.86197	0.204686	0.729278	-0.346086	0.880937
1018	FBgn0010198_RpS15Aa	0.103193	0.594035	0.294637	0.678242	0.0818434	0.49136	0.400898	0.103193	2.39545	0.130426	0.594035	0.907059	0.294637	1.26568	0.678242	1.20124	0.0818434	2.65446	0.147555	0.49136	-0.688147	0.895605
1019	FBgn0010213_Sod2	0.935482	0.00442066	0.999412	0.00448664	0.880985	0.000989986	0.00592524	0.935482	0.0667966	0.0586169	0.00442066	3.21081	0.999412	0.242858	0.00448664	3.65504	0.880985	0.127088	0.080546	0.000989986	3.29336	1.87973
1020	FBgn0010215_alpha-Cat	0.661539	0.00588897	0.998413	0.00689712	0.99746	0.0297207	0.0348177	0.661539	0.417183	0.0924946	0.00588897	3.06403	0.998413	0.278091	0.00689712	3.41607	0.99746	0.00254306	0.0094155	0.0297207	2.17379	1.86884
1021	FBgn0010217_ATPsynbeta	0.201143	0.18964	0.797769	0.373772	0.165778	0.44593	0.662953	0.201143	1.66507	0.0777449	0.18964	1.46589	0.797769	0.703474	0.373772	1.48301	0.165778	1.87435	0.0773566	0.44593	0.762217	1.22216
1022	FBgn0010220_Dbp45A	0.277963	0.358223	0.678174	0.672648	0.31801	0.540323	0.858304	0.277963	1.31915	0.118145	0.358223	1.17305	0.678174	0.824178	0.672648	1.20532	0.31801	1.17675	0.121644	0.540323	0.612325	1.07652
1023	FBgn0010222_Nmdmc	0.696216	0.998737	0.00520757	0.00595405	0.933662	0.169352	0.0308414	0.696216	0.365161	0.184867	0.998737	0.269336	0.00520757	3.12658	0.00595405	3.49686	0.933662	0.0687509	0.0415271	0.169352	1.37429	1.39371
1024	FBgn0010223_Galphaf	0.414656	0.910027	0.13816	0.221372	0.242422	0.162691	0.590211	0.414656	0.898576	0.102919	0.910027	0.56601	0.13816	1.60608	0.221372	1.72176	0.242422	1.46482	0.134337	0.162691	-1.39608	0.719446
1025	FBgn0010225_Gel	0.888288	0.188434	0.930239	0.251506	0.52639	0.23124	0.714279	0.888288	0.118786	0.0335097	0.188434	1.46874	0.930239	0.533632	0.251506	1.66384	0.52639	0.651385	0.0595273	0.23124	1.19717	1.27568
1026	FBgn0010226_GstS1	0.0844933	0.00439184	0.979648	0.010993	0.047143	0.519629	0.0260634	0.0844933	2.61869	0.147354	0.00439184	3.2142	0.979648	0.416615	0.010993	3.16595	0.047143	3.28221	0.114501	0.519629	0.643918	1.2651
1027	FBgn0010228_HmgZ	0.425994	0.579159	0.531807	0.951988	0.383163	0.90618	0.944916	0.425994	0.870491	0.0371893	0.579159	0.921962	0.531807	0.97039	0.951988	1.02695	0.383163	0.981018	0.0447154	0.90618	0.117858	1.01099
1028	FBgn0010235_Klc	0.942183	0.131863	0.95901	0.166499	0.982513	0.0937906	0.446177	0.942183	0.0596386	0.0189674	0.131863	1.6266	0.95901	0.476439	0.166499	1.85106	0.982513	0.0176491	0.0127093	0.0937906	1.67573	1.31792
1029	FBgn0010238_Lac	0.691882	0.0268125	0.991771	0.033149	0.575709	0.138476	0.150469	0.691882	0.371513	0.0284737	0.0268125	2.33538	0.991771	0.356596	0.033149	2.60668	0.575709	0.559303	0.0262158	0.138476	1.48149	1.66721
1030	FBgn0010240_Lcch3	0.471951	0.0155556	0.992391	0.0214197	0.365657	0.0550546	0.0897786	0.471951	0.764147	0.0553038	0.0155556	2.58888	0.992391	0.352087	0.0214197	2.82285	0.365657	1.02997	0.0625864	0.0550546	1.91845	1.96378
1031	FBgn0010241_Mdr50	0.0804232	0.00255227	0.985091	0.00650525	0.0419796	0.0432592	0.0152163	0.0804232	2.67414	0.300518	0.00255227	3.50117	0.985091	0.394157	0.00650525	3.44809	0.0419796	3.41628	0.270208	0.0432592	2.0212	1.93605
1032	FBgn0010246_Myo61F	0.805839	0.0656384	0.980149	0.0817499	0.854499	0.0288703	0.161191	0.805839	0.216959	0.0668984	0.0656384	1.9333	0.980149	0.414735	0.0817499	2.17743	0.854499	0.157817	0.061582	0.0288703	2.18525	1.41658
1033	FBgn0010247_Parp	0.975394	0.538469	0.704451	0.831306	0.907538	0.790691	0.990335	0.975394	0.0249279	0.0345543	0.538469	0.963468	0.704451	0.798353	0.831306	1.09867	0.907538	0.0972392	0.0805697	0.790691	0.265413	1.03439
1034	FBgn0010258_Rbp4	0.367372	0.458301	0.626215	0.829323	0.254284	0.770197	0.828035	0.367372	1.02507	0.486434	0.458301	1.05002	0.626215	0.875167	0.829323	1.09991	0.254284	1.41385	0.496223	0.770197	0.292117	1.0417
1035	FBgn0010263_Rbp9	0.691784	0.012861	0.996462	0.0153186	0.38292	0.0728923	0.0747268	0.691784	0.371657	0.0390842	0.012861	2.67946	0.996462	0.312507	0.0153186	2.99322	0.38292	0.981682	0.0606603	0.0728923	1.7935	1.66099
1036	FBgn0010265_RpS13	0.684077	0.199408	0.906626	0.287334	0.700254	0.205639	0.73669	0.684077	0.383057	0.0945311	0.199408	1.44347	0.906626	0.571065	0.287334	1.60329	0.700254	0.359281	0.102497	0.205639	1.26565	1.2667
1037	FBgn0010269_Dsor1	0.750147	0.117727	0.955645	0.157202	0.720886	0.023064	0.130646	0.750147	0.289416	0.0982234	0.117727	1.67643	0.955645	0.484175	0.157202	1.87719	0.720886	0.329778	0.0987649	0.023064	2.27237	1.48118
1038	FBgn0010278_Ssrp	0.868812	0.201482	0.922215	0.272659	0.947899	0.152194	0.628653	0.868812	0.141089	0.0570724	0.201482	1.43884	0.922215	0.547023	0.272659	1.62714	0.947899	0.0535734	0.0497963	0.152194	1.43183	1.27481
1039	FBgn0010280_Taf4	0.376354	0.0419862	0.972159	0.0650768	0.56647	0.099944	0.226909	0.376354	0.999773	0.0561293	0.0419862	2.13209	0.972159	0.441608	0.0650768	2.28397	0.56647	0.575909	0.0407393	0.099944	1.64512	1.51803
1040	FBgn0010282_TfIIFalpha	0.95147	0.513385	0.722231	0.787884	0.970167	0.476632	0.979448	0.95147	0.0498046	0.0385332	0.513385	0.989753	0.722231	0.780762	0.787884	1.12622	0.970167	0.0303081	0.0283778	0.476632	0.711731	1.08999
1041	FBgn0010287_Trf	0.745497	0.00270345	0.999469	0.00293839	0.857494	0.0011329	0.00677816	0.745497	0.295719	0.124822	0.00270345	3.47016	0.999469	0.239566	0.00293839	3.89852	0.857494	0.154292	0.105242	0.0011329	3.25526	2.06805
1042	FBgn0010288_Uch	0.927546	0.00786066	0.9988	0.00821374	0.834592	0.00627347	0.0370554	0.927546	0.0753448	0.0324173	0.00786066	2.91936	0.9988	0.267443	0.00821374	3.32127	0.834592	0.181575	0.0486672	0.00627347	2.73313	2.01882
1043	FBgn0010292_bys	0.496718	0.0669098	0.965643	0.0971874	0.538737	0.0308917	0.171612	0.496718	0.711245	0.098028	0.0669098	1.92483	0.965643	0.459942	0.0971874	2.09734	0.538737	0.627511	0.101926	0.0308917	2.15846	1.45964
1044	FBgn0010294_ng2	NA	NA	NA	NA	NA	NA	1	NA	NA	NA	NA	NA	NA	NA	NA	NA	NA	NA	NA	NA	NA	NA
1045	FBgn0010295_ng3	NA	NA	NA	NA	NA	NA	1	NA	NA	NA	NA	NA	NA	NA	NA	NA	NA	NA	NA	NA	NA	NA
1046	FBgn0010296_ng4	0.367813	0.543436	0.543436	1	1	0.00195201	0.0116551	0.367813	1.02381	2.82843	0.543436	0.958333	0.543436	0.958333	1	1	1	0	1.33e-16	0.00195201	-3.09744	0.3033
1047	FBgn0010300_brat	0.250408	0.436791	0.586187	0.84645	0.262054	0.969092	0.822602	0.250408	1.43022	0.124518	0.436791	1.07475	0.586187	0.914906	0.84645	1.08931	0.262054	1.38179	0.121653	0.969092	0.0387466	1.00337
1048	FBgn0010303_hep	0.616422	0.846953	0.277362	0.425274	0.618608	0.392893	0.857596	0.616422	0.489309	0.0271452	0.846953	0.648636	0.277362	1.29372	0.425274	1.42338	0.618608	0.485688	0.0246372	0.392893	-0.854383	0.778759
1049	FBgn0010309_pigeon	0.207476	0.0237602	0.970106	0.0440411	0.320907	0.00977891	0.0572576	0.207476	1.63169	0.148011	0.0237602	2.39096	0.970106	0.44766	0.0440411	2.46924	0.320907	1.16718	0.131548	0.00977891	2.58355	1.55365
1050	FBgn0010313_corto	0.681594	0.0121809	0.996595	0.01455	0.882739	0.0474719	0.0708957	0.681594	0.386759	0.0674112	0.0121809	2.70554	0.996595	0.310713	0.01455	3.01974	0.882739	0.125088	0.042418	0.0474719	1.98207	1.7933
1051	FBgn0010314_Cks30A	0.276347	0.136483	0.879897	0.244506	0.613911	0.618093	0.585405	0.276347	1.32534	0.389245	0.136483	1.61145	0.879897	0.60798	0.244506	1.67666	0.613911	0.493484	0.189146	0.618093	-0.498555	0.830116
1052	FBgn0010315_CycD	0.839524	0.153019	0.944274	0.202809	0.866073	0.0985971	0.463569	0.839524	0.175633	0.0352864	0.153019	1.56105	0.944274	0.507942	0.202809	1.7615	0.866073	0.144267	0.0352255	0.0985971	1.65169	1.3591
1053	FBgn0010316_dap	0.82626	0.666206	0.552602	0.884868	0.645525	0.947082	0.99198	0.82626	0.191695	0.0522488	0.666206	0.835909	0.552602	0.94891	0.884868	1.06605	0.645525	0.442177	0.0845026	0.947082	-0.066372	0.991006
1054	FBgn0010317_CycJ	0.707744	0.418994	0.757699	0.657547	0.849058	0.720101	0.961534	0.707744	0.348467	0.0555278	0.418994	1.09583	0.757699	0.745141	0.657547	1.21646	0.849058	0.164252	0.0471722	0.720101	0.358324	1.06591
1055	FBgn0010323_Gsc	0.218995	0.0305676	0.964552	0.055973	0.193415	0.0338743	0.169948	0.218995	1.57363	0.374673	0.0305676	2.2755	0.964552	0.462785	0.055973	2.35502	0.193415	1.70732	0.321672	0.0338743	2.12156	1.5079
1056	FBgn0010328_woc	0.782546	0.720323	0.481781	0.758499	0.813152	0.403528	0.954966	0.782546	0.246606	0.0567294	0.720323	0.782656	0.481781	1.02385	0.758499	1.1455	0.813152	0.207835	0.0554388	0.403528	-0.835338	0.90312
1057	FBgn0010329_Tbh	0.484619	0.0881176	0.952192	0.131134	0.544378	0.0691089	0.349281	0.484619	0.736734	0.0472249	0.0881176	1.80361	0.952192	0.491746	0.131134	1.95985	0.544378	0.616793	0.0485051	0.0691089	1.81771	1.42496
1058	FBgn0010333_Rac1	0.659238	0.00850669	0.997599	0.0101253	0.761446	0.0506624	0.0499669	0.659238	0.420735	0.0595135	0.00850669	2.88032	0.997599	0.295093	0.0101253	3.20942	0.761446	0.274271	0.0367305	0.0506624	1.95433	1.81396
1059	FBgn0010339_128up	0.761032	0.0279306	0.992427	0.0334969	0.863746	0.054505	0.156308	0.761032	0.274821	0.06878	0.0279306	2.31667	0.992427	0.351817	0.0334969	2.60159	0.863746	0.146977	0.0497576	0.054505	1.9228	1.51257
1060	FBgn0010340_140up	0.537784	0.0856947	0.958052	0.123353	0.712897	0.116956	0.415819	0.537784	0.629333	0.0524215	0.0856947	1.81586	0.958052	0.478679	0.123353	1.98781	0.712897	0.341095	0.0416694	0.116956	1.56768	1.49782
1061	FBgn0010341_Cdc42	0.785281	0.579771	0.63248	0.946614	0.833989	0.832458	0.994493	0.785281	0.243078	0.038339	0.579771	0.921346	0.63248	0.868999	0.946614	1.03002	0.833989	0.182304	0.0350434	0.832458	0.211551	1.08275
1062	FBgn0010342_Map60	0.619486	0.244873	0.869662	0.36991	0.462207	0.252313	0.814596	0.619486	0.484238	0.0827966	0.244873	1.35084	0.869662	0.621075	0.36991	1.48779	0.462207	0.785761	0.0828567	0.252313	1.14475	1.15818
1063	FBgn0010348_Arf79F	0.335408	0.061697	0.953847	0.100863	0.423016	0.0676723	0.317569	0.335408	1.12064	0.0700693	0.061697	1.96068	0.953847	0.488158	0.100863	2.08023	0.423016	0.87779	0.0651018	0.0676723	1.82718	1.58868
1064	FBgn0010350_CdsA	0.715292	0.0286306	0.99151	0.0351243	0.891972	0.0806727	0.159947	0.715292	0.337688	0.0497002	0.0286306	2.30536	0.99151	0.358419	0.0351243	2.57849	0.891972	0.114625	0.0290137	0.0806727	1.7468	1.61668
1065	FBgn0010352_Nc73EF	0.251667	0.0266788	0.972745	0.0464807	0.47982	0.0538342	0.149769	0.251667	1.42488	0.0696027	0.0266788	2.33767	0.972745	0.439827	0.0464807	2.44342	0.47982	0.74703	0.0585272	0.0538342	1.92817	1.5768
1066	FBgn0010355_Taf1	0.968758	0.175463	0.94139	0.226782	0.953917	0.235924	0.685761	0.968758	0.031764	0.0234575	0.175463	1.50046	0.94139	0.513502	0.226782	1.71081	0.953917	0.0472308	0.0277279	0.235924	1.18524	1.33825
1067	FBgn0010356_Taf5	0.626607	0.0262691	0.990813	0.033565	0.529453	0.0570856	0.147619	0.626607	0.472555	0.0832104	0.0262691	2.34477	0.990813	0.363088	0.033565	2.6006	0.529453	0.645408	0.0996601	0.0570856	1.90266	1.66838
1068	FBgn0010357_betaTry	NA	NA	NA	NA	NA	NA	1	NA	NA	NA	NA	NA	NA	NA	NA	NA	NA	NA	NA	NA	NA	NA
1069	FBgn0010358_deltaTry	NA	NA	NA	NA	NA	NA	1	NA	NA	NA	NA	NA	NA	NA	NA	NA	NA	NA	NA	NA	NA	NA
1070	FBgn0010359_gammaTry	NA	NA	NA	NA	NA	NA	1	NA	NA	NA	NA	NA	NA	NA	NA	NA	NA	NA	NA	NA	NA	NA
1071	FBgn0010379_Akt1	0.722261	0.061554	0.979172	0.0790132	0.844458	0.235603	0.316945	0.722261	0.327844	0.0336321	0.061554	1.96171	0.979172	0.418375	0.0790132	2.19326	0.844458	0.169727	0.0217725	0.235603	1.18605	1.3047
1072	FBgn0010380_AP-1-2beta	0.525517	0.0528876	0.975068	0.074442	0.487896	0.0255011	0.143578	0.525517	0.653095	0.0965911	0.0528876	2.02901	0.975068	0.432508	0.074442	2.22103	0.487896	0.729765	0.110162	0.0255011	2.23373	1.53512
1073	FBgn0010382_CycE	0.349554	0.893406	0.143298	0.241261	0.502758	0.382678	0.604654	0.349554	1.07721	0.118087	0.893406	0.589884	0.143298	1.58999	0.241261	1.68272	0.502758	0.698762	0.0958358	0.382678	-0.872972	0.794593
1074	FBgn0010383_Cyp18a1	0.423488	0.00106782	0.999362	0.00141188	0.72812	0.00334544	0.00638986	0.423488	0.87663	0.125506	0.00106782	3.98899	0.999362	0.245458	0.00141188	4.34108	0.72812	0.319643	0.0729982	0.00334544	2.93407	2.16226
1075	FBgn0010385_Def	0.333893	0.164537	0.872519	0.282676	0.269178	0.591394	0.659933	0.333893	1.1254	0.648477	0.164537	1.52897	0.872519	0.617467	0.282676	1.61073	0.269178	1.35326	0.35824	0.591394	0.536818	1.21083
1076	FBgn0010387_Dbi	0.271	0.018792	0.981791	0.0316164	0.108243	0.0669374	0.107586	0.271	1.34609	0.280689	0.018792	2.49994	0.981791	0.408337	0.0316164	2.62982	0.108243	2.3424	0.314864	0.0669374	1.83209	1.66876
1077	FBgn0010388_Dro	0.532847	1	1.18e-10	1.2e-10	0.772759	0.0620878	7.1e-10	0.532847	0.638828	1.23245	1	0.0582486	1.18e-10	25.1983	1.2e-10	27.9382	0.772759	0.25934	0.130547	0.0620878	1.86567	5.73001
1078	FBgn0010389_htl	0.378945	0.016619	0.989151	0.0247857	0.494695	0.0374434	0.0956616	0.378945	0.992596	0.0556772	0.016619	2.55765	0.989151	0.37328	0.0247857	2.7499	0.494695	0.715461	0.0561791	0.0374434	2.0809	1.72234
1079	FBgn0010391_Gtp-bp	0.900395	0.072668	0.98018	0.0880823	0.942903	0.0649849	0.331792	0.900395	0.105178	0.0847087	0.072668	1.88842	0.98018	0.414619	0.0880823	2.14282	0.942903	0.0588723	0.0522313	0.0649849	1.84536	1.47138
1080	FBgn0010395_Itgbn	0.0590128	0.0416564	0.872022	0.115899	0.125715	0.0725189	0.225311	0.0590128	3.0247	0.459231	0.0416564	2.13563	0.872022	0.618097	0.115899	2.01637	0.125715	2.17705	0.39731	0.0725189	1.79585	1.74446
1081	FBgn0010397_LamC	0.935097	0.00877321	0.998648	0.00918822	0.999483	0.0105087	0.0514981	0.935097	0.0672102	0.0368686	0.00877321	2.86513	0.998648	0.271887	0.00918822	3.26112	0.999483	0.000516748	0.00265406	0.0105087	2.55863	1.77898
1082	FBgn0010398_Lrr47	0.78034	0.646634	0.563858	0.916169	0.775995	0.611625	0.993117	0.78034	0.249462	0.0491119	0.646634	0.855095	0.563858	0.937429	0.916169	1.04759	0.775995	0.255111	0.0539753	0.611625	-0.507755	0.942202
1083	FBgn0010399_Nmdar1	0.131404	0.00193309	0.993185	0.00408199	0.218136	0.0110319	0.0115427	0.131404	2.12835	0.0928301	0.00193309	3.65296	0.993185	0.345907	0.00408199	3.70868	0.218136	1.57785	0.0862715	0.0110319	2.54169	1.82949
1084	FBgn0010401_Os-C	0.49679	0.800161	0.308018	0.502729	0.648408	0.518841	0.890208	0.49679	0.711095	0.104737	0.800161	0.700919	0.308018	1.24491	0.502729	1.34519	0.648408	0.43763	0.106471	0.518841	-0.645133	0.796967
1085	FBgn0010403_Obp83b	0.608836	0.0483528	0.980906	0.0645564	0.740642	0.0382102	0.208445	0.608836	0.501976	0.0920107	0.0483528	2.06894	0.980906	0.411833	0.0645564	2.28774	0.740642	0.302345	0.0788634	0.0382102	2.07259	1.49453
1086	FBgn0010406_RNaseX25	0.623914	0.587561	0.586977	0.99941	0.747898	0.964337	0.995036	0.623914	0.476957	0.0388914	0.587561	0.91353	0.586977	0.914114	0.99941	1.00033	0.747898	0.29246	0.0327866	0.964337	0.0447115	1.00452
1087	FBgn0010407_Ror	0.147511	0.230522	0.716033	0.491499	0.204127	0.286705	0.616176	0.147511	2.00162	0.118077	0.230522	1.37825	0.716033	0.786909	0.491499	1.35582	0.204127	1.64921	0.108709	0.286705	1.06538	1.16755
1088	FBgn0010408_RpS9	0.748674	0.0987697	0.964291	0.129995	0.971813	0.186498	0.464185	0.748674	0.291409	0.175072	0.0987697	1.7535	0.964291	0.463457	0.129995	1.96383	0.971813	0.0286108	0.0454095	0.186498	1.32101	1.4402
1089	FBgn0010409_RpL18A	0.642601	0.181095	0.91298	0.262834	0.770976	0.258272	0.698421	0.642601	0.446811	0.137398	0.181095	1.48643	0.91298	0.56154	0.262834	1.64383	0.770976	0.261678	0.108823	0.258272	1.13048	1.29084
1090	FBgn0010411_RpS18	0.808045	0.105679	0.964057	0.136723	0.889392	0.163214	0.488365	0.808045	0.214198	0.114447	0.105679	1.72382	0.964057	0.464057	0.136723	1.94079	0.889392	0.117537	0.0990099	0.163214	1.39434	1.49018
1091	FBgn0010412_RpS19a	0.838867	0.12624	0.956551	0.164187	0.906569	0.147213	0.555008	0.838867	0.176423	0.0871154	0.12624	1.64576	0.956551	0.482129	0.164187	1.85742	0.906569	0.0983126	0.0803991	0.147213	1.44944	1.35096
1092	FBgn0010414_SerT	0.761647	0.246148	0.887187	0.353105	0.789776	0.19727	0.732443	0.761647	0.274004	0.0653653	0.246148	1.34848	0.887187	0.598341	0.353105	1.50914	0.789776	0.237306	0.061024	0.19727	1.28937	1.28084
1093	FBgn0010415_Sdc	0.850714	0.693057	0.527821	0.832489	0.717701	0.690323	0.988917	0.850714	0.162288	0.0561255	0.693057	0.80957	0.527821	0.974551	0.832489	1.09794	0.717701	0.334274	0.0502156	0.690323	-0.398416	0.895504
1094	FBgn0010416_TH1	0.993798	0.24291	0.91008	0.324888	0.991764	0.265189	0.811685	0.993798	0.00622183	0.00986954	0.24291	1.35451	0.91008	0.565929	0.324888	1.54727	0.991764	0.0082713	0.00953329	0.265189	1.11421	1.2414
1095	FBgn0010417_Taf6	0.905702	0.159099	0.945328	0.207246	0.932857	0.114257	0.517111	0.905702	0.0992738	0.066144	0.159099	1.54383	0.945328	0.505868	0.207246	1.75168	0.932857	0.069616	0.0462866	0.114257	1.57935	1.26034
1096	FBgn0010421_TfIIFbeta	0.144331	0.530002	0.405215	0.868359	0.239237	0.796428	0.607506	0.144331	2.02545	0.109938	0.530002	0.972272	0.405215	1.11259	0.868359	1.07596	0.239237	1.47895	0.0937524	0.796428	-0.257973	0.949544
1097	FBgn0010422_TfIIS	0.309025	0.163771	0.866195	0.287149	0.421963	0.0904002	0.433627	0.309025	1.207	0.127355	0.163771	1.53103	0.866195	0.625407	0.287149	1.60359	0.421963	0.880384	0.109563	0.0904002	1.69329	1.20409
1098	FBgn0010423_TpnC47D	0.946111	0.0304582	0.993822	0.0340805	0.735376	0.375716	0.169386	0.946111	0.0554668	0.0741617	0.0304582	2.27714	0.993822	0.340553	0.0340805	2.59317	0.735376	0.30958	0.143614	0.375716	0.885818	1.15978
1099	FBgn0010424_TpnC73F	0.639347	0.327249	0.815163	0.507342	0.64811	0.295133	0.877357	0.639347	0.451993	0.0880511	0.327249	1.21634	0.815163	0.684667	0.507342	1.34089	0.64811	0.438098	0.0741745	0.295133	1.04693	1.25094
1100	FBgn0010425_epsilonTry	NA	NA	NA	NA	NA	NA	1	NA	NA	NA	NA	NA	NA	NA	NA	NA	NA	NA	NA	NA	NA	NA
1101	FBgn0010431_mtrm	0.522278	0.510949	0.632262	0.877273	0.795574	0.198454	0.734802	0.522278	0.659467	0.594657	0.510949	0.992339	0.632262	0.869214	0.877273	1.07059	0.795574	0.229912	0.18555	0.198454	1.28597	1.43399
1102	FBgn0010433_ato	0.708482	0.0120743	0.99683	0.0142161	0.457185	0.720265	0.0702938	0.708482	0.347407	0.34877	0.0120743	2.70977	0.99683	0.307416	0.0142161	3.03173	0.457185	0.797088	0.415168	0.720265	0.358105	1.25492
1103	FBgn0010434_cora	0.913356	0.605244	0.632391	0.97244	0.916412	0.739334	0.996216	0.913356	0.0908209	0.0243463	0.605244	0.895903	0.632391	0.869086	0.97244	1.01538	0.916412	0.0874664	0.0263051	0.739334	-0.332736	0.952519
1104	FBgn0010435_emp	0.0472328	0.00525299	0.960124	0.0162318	0.0602869	0.0249959	0.0311069	0.0472328	3.28001	0.0971827	0.00525299	3.12214	0.960124	0.473793	0.0162318	2.9635	0.0602869	3.00035	0.0869107	0.0249959	2.24147	1.76663
1105	FBgn0010438_mtSSB	0.245429	0.73901	0.275531	0.524633	0.211425	0.495398	0.759531	0.245429	1.45166	0.1405	0.73901	0.764018	0.275531	1.29678	0.524633	1.32505	0.211425	1.61142	0.149289	0.495398	-0.681748	0.90252
1106	FBgn0010441_pll	0.756551	0.0613384	0.980343	0.0775589	0.591149	0.00146963	0.00878543	0.756551	0.280803	0.0975063	0.0613384	1.96326	0.980343	0.414001	0.0775589	2.20191	0.591149	0.532166	0.120745	0.00146963	3.18062	1.58851
1107	FBgn0010452_trn	0.788547	0.146565	0.944157	0.196884	0.888709	0.390498	0.613614	0.788547	0.238881	0.0382374	0.146565	1.58006	0.944157	0.508171	0.196884	1.77495	0.888709	0.118309	0.0295005	0.390498	0.858714	1.23103
1108	FBgn0010453_Wnt4	0.867708	0.1256	0.958255	0.161667	0.882485	0.0955032	0.452427	0.867708	0.142369	0.0372818	0.1256	1.64799	0.958255	0.478208	0.161667	1.86445	0.882485	0.125378	0.0410062	0.0955032	1.66706	1.29851
1109	FBgn0010470_Fkbp14	0.0394405	0.00570456	0.95114	0.0187831	0.041351	0.0983849	0.0337429	0.0394405	3.48869	0.181364	0.00570456	3.08016	0.95114	0.493986	0.0187831	2.88912	0.041351	3.43377	0.16559	0.0983849	1.65273	1.63651
1110	FBgn0010473_tutl	0.381978	0.00201523	0.998597	0.00281731	0.260237	0.0308626	0.0120306	0.381978	0.984256	0.07813	0.00201523	3.63001	0.998597	0.273299	0.00281731	3.9232	0.260237	1.3892	0.0735885	0.0308626	2.15884	1.89854
1111	FBgn0010482_l(2)01289	0.673875	0.920886	0.173089	0.24691	0.613954	0.238616	0.680292	0.673875	0.398356	0.043707	0.920886	0.549165	0.173089	1.50651	0.24691	1.67221	0.613954	0.493411	0.0519289	0.238616	-1.17845	0.787881
1112	FBgn0010488_NAT1	0.857375	0.729269	0.486882	0.754309	0.87464	0.424123	0.963526	0.857375	0.154432	0.0315758	0.729269	0.773758	0.486882	1.01826	0.754309	1.14829	0.87464	0.134361	0.0313712	0.424123	-0.799289	0.873632
1113	FBgn0010497_dmGlut	0.314406	0.886585	0.141211	0.244573	0.213339	0.180521	0.598839	0.314406	1.18877	0.117713	0.886585	0.599148	0.141211	1.59646	0.244573	1.67653	0.213339	1.60173	0.156092	0.180521	-1.33915	0.773518
1114	FBgn0010501_Dcp-1	0.833673	0.827021	0.353077	0.520475	0.885646	0.395369	0.926698	0.833673	0.182686	0.0458969	0.827021	0.671511	0.353077	1.18003	0.520475	1.32882	0.885646	0.121781	0.0407755	0.395369	-0.849922	0.899565
1115	FBgn0010504_kermit	0.685872	0.325484	0.82444	0.496116	0.548992	0.698895	0.905821	0.685872	0.38039	0.0857133	0.325484	1.2189	0.82444	0.674401	0.496116	1.35143	0.548992	0.608112	0.111384	0.698895	0.386812	1.14343
1116	FBgn0010516_wal	0.976177	0.0740778	0.981533	0.0876707	0.922643	0.008522	0.0500549	0.976177	0.0241251	0.0321395	0.0740778	1.87995	0.981533	0.409368	0.0876707	2.14499	0.922643	0.0806636	0.0523711	0.008522	2.63066	1.43977
1117	FBgn0010520_Bka	0.928545	0.178922	0.937448	0.234516	0.919864	0.186673	0.693588	0.928545	0.0742648	0.0292546	0.178922	1.49179	0.937448	0.520849	0.234516	1.69559	0.919864	0.0836922	0.0419829	0.186673	1.32049	1.34969
1118	FBgn0010531_Ccs	0.953669	0.311771	0.867756	0.436834	0.986819	0.350582	0.893733	0.953669	0.0474913	0.0346337	0.311771	1.23922	0.867756	0.623462	0.436834	1.41093	0.986819	0.0132723	0.0214948	0.350582	0.933461	1.25067
1119	FBgn0010548_Aldh-III	0.814461	0.221712	0.906775	0.3087	0.799896	0.0934956	0.445094	0.814461	0.206211	0.0597122	0.221712	1.39585	0.906775	0.570845	0.3087	1.57061	0.799896	0.224437	0.0754818	0.0934956	1.67724	1.35677
1120	FBgn0010549_l(2)03659	0.0590755	0.316185	0.484557	0.810531	0.0726328	0.810759	0.306049	0.0590755	3.02349	0.522796	0.316185	1.2326	0.484557	1.0208	0.810531	1.11172	0.0726328	2.78897	0.572761	0.810759	0.239448	1.05727
1121	FBgn0010551_Phb2	0.78677	0.00070865	0.999895	0.000722295	0.856981	0.00200922	0.00424438	0.78677	0.241162	0.0445527	0.00070865	4.23111	0.999895	0.195278	0.000722295	4.77083	0.856981	0.154894	0.0416566	0.00200922	3.08887	2.13803
1122	FBgn0010583_dock	0.681531	0.00375224	0.999087	0.00427215	0.434732	0.035031	0.0223033	0.681531	0.386853	0.0390692	0.00375224	3.29616	0.999087	0.257611	0.00427215	3.68279	0.434732	0.849374	0.0521398	0.035031	2.108	1.90864
1123	FBgn0010590_Prosbeta1	0.831981	0.138101	0.950814	0.181622	0.861852	0.168511	0.590044	0.831981	0.184735	0.0463427	0.138101	1.60626	0.950814	0.494674	0.181622	1.81157	0.861852	0.149187	0.0465946	0.168511	1.377	1.35722
1124	FBgn0010591_Sply	0.653162	0.0158019	0.995122	0.0194008	0.565878	0.0202699	0.0911438	0.653162	0.430177	0.0721762	0.0158019	2.58145	0.995122	0.328189	0.0194008	2.87274	0.565878	0.576984	0.0864559	0.0202699	2.32131	1.82332
1125	FBgn0010602_lwr	0.0278635	0.0392138	0.808866	0.137209	0.0157564	0.0916845	0.0908919	0.0278635	3.89583	0.0916706	0.0392138	2.16278	0.808866	0.691538	0.137209	1.93917	0.0157564	4.5782	0.0969596	0.0916845	1.68658	1.48868
1126	FBgn0010607_l(2)05714	0.55689	0.170198	0.909491	0.255364	0.401436	0.251547	0.673527	0.55689	0.59343	0.0645712	0.170198	1.51398	0.909491	0.566813	0.255364	1.65693	0.401436	0.932358	0.0698426	0.251547	1.1466	1.28375
1127	FBgn0010611_Hmgs	0.213426	0.0115035	0.984582	0.0207949	0.28398	0.0229052	0.067066	0.213426	1.60129	0.109234	0.0115035	2.73311	0.984582	0.396479	0.0207949	2.83773	0.28398	1.29643	0.0916316	0.0229052	2.27501	1.69298
1128	FBgn0010612_ATPsynG	0.722566	0.0122735	0.99687	0.0143588	0.628507	0.0706505	0.0714178	0.722566	0.327415	0.0807863	0.0122735	2.7019	0.99687	0.306834	0.0143588	3.02657	0.628507	0.469459	0.0876601	0.0706505	1.80772	1.83323
1129	FBgn0010620_CG10939	0.528815	0.0981728	0.950211	0.143337	0.66139	0.0690429	0.349004	0.528815	0.646651	0.0450295	0.0981728	1.75616	0.950211	0.495939	0.143337	1.91924	0.66139	0.417412	0.0363721	0.0690429	1.81814	1.38722
1130	FBgn0010621_CCT5	0.886887	0.0220448	0.995446	0.0247245	0.951404	0.00842285	0.0494848	0.886887	0.120374	0.0877539	0.0220448	2.42562	0.995446	0.324731	0.0247245	2.75113	0.951404	0.0498741	0.0468198	0.00842285	2.63463	1.70557
1131	FBgn0010622_DCTN3-p24	0.125693	0.0737213	0.88115	0.162828	0.0397993	0.32965	0.21626	0.125693	2.17724	0.134082	0.0737213	1.88208	0.88115	0.606344	0.162828	1.8612	0.0397993	3.47817	0.171923	0.32965	0.974818	1.30601
1132	FBgn0010638_Sec61beta	0.0627297	0.142734	0.709426	0.377485	0.117365	0.295581	0.322063	0.0627297	2.95513	0.203198	0.142734	1.59173	0.709426	0.793444	0.377485	1.47846	0.117365	2.25285	0.189541	0.295581	1.04596	1.15148
1133	FBgn0010651_MFS14	0.691008	0.220771	0.894552	0.32071	0.771225	0.248394	0.776132	0.691008	0.372799	0.0804393	0.220771	1.39777	0.894552	0.5883	0.32071	1.55318	0.771225	0.26135	0.0761319	0.248394	1.15426	1.25884
1134	FBgn0010660_Nup214	0.693698	0.605677	0.586418	0.980515	0.5654	0.562597	0.992997	0.693698	0.368847	0.0681739	0.605677	0.895474	0.586418	0.914675	0.980515	1.01085	0.5654	0.577851	0.0836772	0.562597	-0.578988	0.811664
1135	FBgn0010741_Pfdn2	0.371981	0.190219	0.861725	0.320446	0.387363	0.363004	0.718027	0.371981	1.01201	0.0997374	0.190219	1.46454	0.861725	0.63092	0.320446	1.55356	0.387363	0.969623	0.11062	0.363004	0.909657	1.16126
1136	FBgn0010747_Srp54k	0.808902	0.0277183	0.993112	0.0325376	0.86613	0.0124309	0.0723053	0.808902	0.213127	0.0398041	0.0277183	2.32016	0.993112	0.346499	0.0325376	2.61577	0.86613	0.144202	0.0327883	0.0124309	2.49967	1.78351
1137	FBgn0010750_atms	0.551317	0.151521	0.920511	0.225771	0.512854	0.12005	0.535754	0.551317	0.603768	0.1347	0.151521	1.56539	0.920511	0.549767	0.225771	1.71284	0.512854	0.678243	0.133944	0.12005	1.55456	1.24459
1138	FBgn0010762_simj	0.896585	0.26227	0.89142	0.363933	0.941647	0.353281	0.838793	0.896585	0.10944	0.0161016	0.26227	1.31948	0.89142	0.592609	0.363933	1.49527	0.941647	0.0602087	0.00904004	0.353281	0.928245	1.15849
1139	FBgn0010768_sqz	0.126554	0.294819	0.624717	0.650225	0.171897	0.335245	0.555965	0.126554	2.16972	0.119133	0.294819	1.2654	0.624717	0.876644	0.650225	1.22194	0.171897	1.83497	0.120454	0.335245	0.963603	1.17061
1140	FBgn0010770_ppan	0.509871	0.0210609	0.990544	0.0285887	0.478511	0.0523713	0.119896	0.509871	0.684261	0.151337	0.0210609	2.4468	0.990544	0.364826	0.0285887	2.67925	0.478511	0.749856	0.15733	0.0523713	1.94007	1.64534
1141	FBgn0010772_Xe7	0.745924	0.0438428	0.986676	0.0544279	0.89126	0.0260043	0.146227	0.745924	0.295139	0.0495679	0.0438428	2.1127	0.986676	0.386551	0.0544279	2.36827	0.89126	0.115428	0.0300464	0.0260043	2.22615	1.60885
1142	FBgn0010774_Ref1	0.669004	0.43421	0.737603	0.693295	0.68684	0.75912	0.967196	0.669004	0.405747	0.0586569	0.43421	1.07778	0.737603	0.765428	0.693295	1.19041	0.68684	0.378955	0.065203	0.75912	0.306637	1.10271
1143	FBgn0010786_l(3)02640	0.74374	0.475526	0.718204	0.754443	0.687542	0.609775	0.979187	0.74374	0.298111	0.0445522	0.475526	1.03074	0.718204	0.784758	0.754443	1.1482	0.687542	0.377915	0.0558721	0.609775	0.510395	1.08422
1144	FBgn0010803_TrpRS	0.758186	0.512505	0.689054	0.821287	0.727327	0.762971	0.986578	0.758186	0.278617	0.0586539	0.512505	0.990687	0.689054	0.813503	0.821287	1.10494	0.727327	0.320748	0.0635551	0.762971	-0.301582	0.929512
1145	FBgn0010808_Chchd3	0.791698	0.138664	0.948177	0.185056	0.675425	0.189007	0.591646	0.791698	0.234848	0.0615047	0.138664	1.60447	0.948177	0.500143	0.185056	1.80307	0.675425	0.396016	0.0930728	0.189007	1.31352	1.36666
1146	FBgn0010812_unc-45	0.567665	0.606093	0.552364	0.945661	0.742587	0.991251	0.991955	0.567665	0.573745	0.0621134	0.606093	0.89506	0.552364	0.949154	0.945661	1.03056	0.742587	0.299685	0.0523783	0.991251	-0.0109657	0.996902
1147	FBgn0010825_Gug	0.0826338	0.0791658	0.835878	0.197296	0.0779234	0.228531	0.385386	0.0826338	2.64367	0.0754514	0.0791658	1.85071	0.835878	0.661476	0.197296	1.774	0.0779234	2.70967	0.0757104	0.228531	1.20415	1.32432
1148	FBgn0010830_l(3)04053	0.744802	0.464838	0.727398	0.73434	0.68534	0.980026	0.976508	0.744802	0.296665	0.0559061	0.464838	1.04265	0.727398	0.775623	0.73434	1.16178	0.68534	0.381179	0.0537031	0.980026	0.0250363	1.00801
1149	FBgn0010877_l(3)05822	0.0252275	0.822846	0.031236	0.113813	0.0298762	0.193854	0.142134	0.0252275	4.01349	0.301563	0.822846	0.676177	0.031236	2.26566	0.113813	2.02469	0.0298762	3.81358	0.285946	0.193854	-1.29926	0.670946
1150	FBgn0010894_sinu	0.907053	0.294058	0.873764	0.413441	0.951129	0.296944	0.87623	0.907053	0.0977758	0.027365	0.294058	1.2666	0.873764	0.615884	0.413441	1.43646	0.951129	0.0501638	0.0193521	0.296944	1.04301	1.17737
1151	FBgn0010905_Spn	0.167611	0.103338	0.869655	0.210942	0.104946	0.0485202	0.258011	0.167611	1.8624	0.0660832	0.103338	1.73366	0.869655	0.621083	0.210942	1.74366	0.104946	2.37673	0.069205	0.0485202	1.97278	1.34077
1152	FBgn0010909_msn	0.807556	0.111421	0.961538	0.144859	0.73947	0.144618	0.50776	0.807556	0.214808	0.0235362	0.111421	1.7006	0.961538	0.470365	0.144859	1.91443	0.73947	0.303951	0.0265837	0.144618	1.45881	1.4399
1153	FBgn0010926_l(3)07882	0.637153	0.450823	0.716705	0.731221	0.75488	0.46262	0.972567	0.637153	0.455503	0.0685233	0.450823	1.05853	0.716705	0.786243	0.731221	1.16391	0.75488	0.283043	0.0615136	0.46262	0.73454	1.09308
1154	FBgn0011016_SsRbeta	0.0642253	0.0518633	0.85891	0.140064	0.0542426	0.397229	0.273517	0.0642253	2.92834	0.161416	0.0518633	2.03771	0.85891	0.634354	0.140064	1.92977	0.0542426	3.12104	0.123575	0.397229	0.846581	1.23459
1155	FBgn0011020_Sas-4	0.493779	0.186896	0.889151	0.291902	0.650671	0.233906	0.711014	0.493779	0.717375	0.13168	0.186896	1.47239	0.889151	0.595695	0.291902	1.59611	0.650671	0.434074	0.110068	0.233906	1.19036	1.22483
1156	FBgn0011202_dia	0.961023	0.646554	0.599183	0.951858	0.926455	0.467385	0.977171	0.961023	0.0397939	0.0154132	0.646554	0.855173	0.599183	0.901929	0.951858	1.02702	0.926455	0.0765252	0.0243578	0.467385	-0.726741	0.831142
1157	FBgn0011204_cue	0.195529	0.00642468	0.989544	0.0118583	0.152374	0.024412	0.0379342	0.195529	1.69559	0.218244	0.00642468	3.0201	0.989544	0.370979	0.0118583	3.12613	0.152374	1.96619	0.239386	0.024412	2.25058	1.618
1158	FBgn0011205_fbl	0.822749	0.00153261	0.999775	0.00157143	0.857174	0.000509148	0.003051	0.822749	0.195992	0.041641	0.00153261	3.78244	0.999775	0.214535	0.00157143	4.2747	0.857174	0.154668	0.0374858	0.000509148	3.4759	2.04959
1159	FBgn0011206_bol	0.703439	0.0974013	0.962602	0.130478	0.511197	0.161448	0.459285	0.703439	0.354668	0.0587896	0.0974013	1.75963	0.962602	0.467733	0.130478	1.96214	0.511197	0.681582	0.0710102	0.161448	1.40022	1.3633
1160	FBgn0011207_pelo	0.922385	0.0090608	0.998559	0.00955272	0.92159	0.00551581	0.0326419	0.922385	0.0809443	0.0184772	0.0090608	2.84928	0.998559	0.274343	0.00955272	3.24036	0.92159	0.0818096	0.0194303	0.00551581	2.77526	1.8213
1161	FBgn0011211_blw	0.834526	0.0371731	0.990572	0.0439762	0.840665	0.0679009	0.20331	0.834526	0.181655	0.0534121	0.0371731	2.18686	0.990572	0.364645	0.0439762	2.46995	0.840665	0.174265	0.0624357	0.0679009	1.82566	1.64706
1162	FBgn0011217_eff	0.611608	0.00155225	0.999561	0.00179101	0.885535	0.0083828	0.00927746	0.611608	0.497329	0.0824911	0.00155225	3.77527	0.999561	0.233675	0.00179101	4.19444	0.885535	0.121908	0.038549	0.0083828	2.63625	2.08134
1163	FBgn0011224_heph	0.775621	0.421622	0.767871	0.649658	0.782456	0.765417	0.962566	0.775621	0.255599	0.0674716	0.421622	1.09268	0.767871	0.73474	0.649658	1.22236	0.782456	0.246723	0.0550301	0.765417	0.298375	1.01357
1164	FBgn0011225_jar	0.710918	0.452024	0.731422	0.717428	0.213152	0.804947	0.762674	0.710918	0.343919	0.0558298	0.452024	1.05716	0.731422	0.77161	0.717428	1.17342	0.213152	1.60267	0.0757816	0.804947	-0.246949	0.94328
1165	FBgn0011227_ox	0.237709	0.208926	0.798279	0.396275	0.2893	0.532287	0.754922	0.237709	1.4858	0.139969	0.208926	1.42258	0.798279	0.70293	0.396275	1.45607	0.2893	1.27676	0.126696	0.532287	0.624518	1.20545
1166	FBgn0011230_poe	0.646299	0.755591	0.406344	0.647057	0.695498	0.681107	0.956227	0.646299	0.440954	0.0509369	0.755591	0.747285	0.406344	1.1112	0.647057	1.22432	0.695498	0.366211	0.0545017	0.681107	-0.410952	0.922367
1167	FBgn0011232_scat	0.917383	0.364754	0.82978	0.528805	0.941815	0.495318	0.934287	0.917383	0.0864033	0.0253993	0.364754	1.1643	0.82978	0.668405	0.528805	1.3213	0.941815	0.0600298	0.0279152	0.495318	0.681876	1.11651
1168	FBgn0011236_ken	0.00320809	0.626518	0.0223288	0.155271	0.00336063	0.241902	0.0190948	0.00320809	6.58193	0.183197	0.626518	0.874869	0.0223288	2.41968	0.155271	1.88282	0.00336063	6.52133	0.178185	0.241902	-1.17025	0.720858
1169	FBgn0011239_ms(2)35Ci	NA	NA	NA	NA	NA	NA	1	NA	NA	NA	NA	NA	NA	NA	NA	NA	NA	NA	NA	NA	NA	NA
1170	FBgn0011244_Hsp60B	0.849406	0.313622	0.855255	0.452211	1	0.813534	0.895437	0.849406	0.163839	0.45992	0.313622	1.23644	0.855255	0.63877	0.452211	1.39482	1	0	1.84e-16	0.813534	0.235869	1.51923
1171	FBgn0011259_Sema1a	0.929864	0.253087	0.899545	0.346276	0.961638	0.289672	0.826371	0.929864	0.0728403	0.0434468	0.253087	1.3358	0.899545	0.581298	0.346276	1.51809	0.961638	0.039153	0.0245891	0.289672	1.05884	1.18468
1172	FBgn0011260_Sema2a	0.509903	0.367177	0.755737	0.607205	0.756927	0.790868	0.935776	0.509903	0.684196	0.0712754	0.367177	1.16108	0.755737	0.747137	0.607205	1.25519	0.756927	0.2803	0.0491657	0.790868	0.265184	1.13111
1173	FBgn0011270_Pglym87	NA	NA	NA	NA	NA	NA	1	NA	NA	NA	NA	NA	NA	NA	NA	NA	NA	NA	NA	NA	NA	NA
1174	FBgn0011272_RpL13	0.714306	0.108917	0.957755	0.146573	0.925482	0.454632	0.499379	0.714306	0.33909	0.1633	0.108917	1.71058	0.957755	0.479368	0.146573	1.90907	0.925482	0.0775807	0.112361	0.454632	0.747716	1.40684
1175	FBgn0011273_Acam	0.367813	0.543436	0.543436	1	1	0.000808636	0.00484202	0.367813	1.02381	2.82843	0.543436	0.958333	0.543436	0.958333	1	1	1	0	7.57e-17	0.000808636	-3.34982	0.0350033
1176	FBgn0011274_Dif	0.882668	0.0603209	0.983979	0.072501	0.73032	0.106833	0.311542	0.882668	0.125169	0.0243677	0.0603209	1.97067	0.983979	0.39916	0.072501	2.23337	0.73032	0.316581	0.0359588	0.106833	1.61259	1.55478
1177	FBgn0011276_HLH3B	0.142399	0.0896041	0.871499	0.191183	0.10547	0.317521	0.430647	0.142399	2.0402	0.641453	0.0896041	1.79626	0.871499	0.618759	0.191183	1.78828	0.10547	2.3712	0.605466	0.317521	0.999566	1.39189
1178	FBgn0011277_HLH4C	0.153295	0.0975932	0.868396	0.204115	0.356764	0.237122	0.459975	0.153295	1.95962	0.378384	0.0975932	1.75876	0.868396	0.622662	0.204115	1.75858	0.356764	1.05579	0.29633	0.237122	1.18221	1.28921
1179	FBgn0011278_lbe	0.261708	0.598817	0.431059	0.827861	1	0.978301	0.838055	0.261708	1.3832	1.08621	0.598817	0.902292	0.431059	1.08148	0.827861	1.10082	1	2.1e-14	3.47e-15	0.978301	-0.0271989	0.870638
1180	FBgn0011279_Obp69a	0.60089	0.0019772	0.999413	0.00231403	0.77392	0.0151481	0.0118047	0.60089	0.515424	0.128272	0.0019772	3.64051	0.999413	0.242766	0.00231403	4.03976	0.77392	0.25782	0.0833765	0.0151481	2.42882	2.13331
1181	FBgn0011280_Obp19d	0.342644	0.0355704	0.974005	0.0564683	0.200451	0.046382	0.19532	0.342644	1.09819	0.153874	0.0355704	2.20675	0.974005	0.435912	0.0564683	2.35085	0.200451	1.66878	0.187041	0.046382	1.9919	1.49531
1182	FBgn0011281_Obp83a	0.487315	0.00487006	0.99781	0.00635657	0.572774	0.00289294	0.0172326	0.487315	0.730997	0.133153	0.00487006	3.1609	0.99781	0.291178	0.00635657	3.46079	0.572774	0.564549	0.121599	0.00289294	2.97889	2.06459
1183	FBgn0011282_Obp84a	0.278709	0.111281	0.902613	0.197156	0.519713	0.214553	0.507295	0.278709	1.31631	0.107925	0.111281	1.70115	0.902613	0.57691	0.197156	1.77432	0.519713	0.664541	0.0877018	0.214553	1.24114	1.36679
1184	FBgn0011283_Obp28a	0.52687	0.354649	0.770285	0.579985	0.725605	0.859887	0.92776	0.52687	0.650447	0.208474	0.354649	1.17789	0.770285	0.732256	0.579985	1.27726	0.725605	0.323155	0.144138	0.859887	0.176517	1.07213
1185	FBgn0011284_RpS4	0.835856	0.0549326	0.984767	0.0667283	0.922829	0.0118407	0.0689739	0.835856	0.180048	0.126298	0.0549326	2.01216	0.984767	0.395641	0.0667283	2.27221	0.922829	0.0804616	0.0787716	0.0118407	2.51686	1.47325
1186	FBgn0011286_RyR	0.845508	0.0893811	0.972298	0.112413	0.845294	0.0480229	0.255681	0.845508	0.168474	0.0641965	0.0893811	1.79736	0.972298	0.441188	0.112413	2.03038	0.845294	0.168729	0.0658304	0.0480229	1.97717	1.46498
1187	FBgn0011288_Snap25	0.957704	0.151506	0.951432	0.193223	0.952722	0.0828137	0.404687	0.957704	0.0432595	0.0401384	0.151506	1.56543	0.951432	0.493366	0.193223	1.78346	0.952722	0.0484863	0.0482244	0.0828137	1.73459	1.38771
1188	FBgn0011289_TfIIA-L	0.603456	0.155349	0.924033	0.226206	0.551397	0.116971	0.525923	0.603456	0.511061	0.113366	0.155349	1.55437	0.924033	0.544057	0.226206	1.71196	0.551397	0.603618	0.114044	0.116971	1.56761	1.36734
1189	FBgn0011290_Taf12	0.366807	0.67409	0.406856	0.72846	0.30338	0.567791	0.885719	0.366807	1.02668	0.131328	0.67409	0.828182	0.406856	1.11057	0.72846	1.1658	0.30338	1.22648	0.138275	0.567791	-0.571308	0.948828
1190	FBgn0011291_Taf11	0.935098	0.0312076	0.993522	0.0351153	0.938274	0.0187764	0.107501	0.935098	0.0672083	0.0569823	0.0312076	2.26607	0.993522	0.343126	0.0351153	2.57861	0.938274	0.063808	0.0488614	0.0187764	2.34994	1.54215
1191	FBgn0011293_a10	0.71437	0.171747	0.92541	0.240921	0.723239	0.147739	0.61679	0.71437	0.338999	0.115808	0.171747	1.50996	0.92541	0.541785	0.240921	1.68336	0.723239	0.326469	0.103724	0.147739	1.44757	1.15025
1192	FBgn0011294_a5	0.64802	9.35e-05	0.999979	9.84e-05	0.812054	0.00363057	0.000560582	0.64802	0.43824	0.0558919	9.35e-05	5.56286	0.999979	0.161596	9.84e-05	6.21058	0.812054	0.209199	0.0396177	0.00363057	2.90859	2.47907
1193	FBgn0011296_l(2)efl	0.907321	0.0905467	0.973934	0.111562	0.957695	0.0966008	0.434175	0.907321	0.0974798	0.0652578	0.0905467	1.79167	0.973934	0.436134	0.111562	2.03386	0.957695	0.0432689	0.0417459	0.0966008	1.66156	1.3601
1194	FBgn0011297_l(2)not	0.935266	0.192415	0.931413	0.253859	0.909912	0.0570094	0.296856	0.935266	0.0670284	0.0662896	0.192415	1.45942	0.931413	0.531603	0.253859	1.65961	0.909912	0.0946149	0.0827751	0.0570094	1.90324	1.29604
1195	FBgn0011300_babo	0.931714	0.011302	0.998147	0.012004	0.900535	0.102727	0.0659243	0.931714	0.0708461	0.0175885	0.011302	2.74165	0.998147	0.28428	0.012004	3.11974	0.900535	0.105022	0.0212838	0.102727	1.63178	1.85429
1196	FBgn0011305_Rsf1	0.908306	0.895048	0.25777	0.35568	0.862214	0.43127	0.832802	0.908306	0.0963889	0.0485956	0.895048	0.587612	0.25777	1.32741	0.35568	1.50581	0.862214	0.148764	0.0391852	0.43127	-0.78702	0.843643
1197	FBgn0011327_Uch-L5	0.894904	0.893428	0.25848	0.35814	0.667243	0.23556	0.800447	0.894904	0.111326	0.0346755	0.893428	0.589853	0.25848	1.32615	0.35814	1.50264	0.667243	0.408432	0.0697618	0.23556	-1.18616	0.82488
1198	FBgn0011335_vers	0.10045	0.669008	0.224801	0.523848	0.144428	0.483919	0.47015	0.10045	2.42541	0.0981233	0.669008	0.833163	0.224801	1.38961	0.523848	1.32576	0.144428	2.02472	0.0942212	0.483919	-0.700014	0.868543
1199	FBgn0011336_Stt3B	0.0758568	0.055217	0.867193	0.141751	0.134706	0.756954	0.288799	0.0758568	2.73995	0.132033	0.055217	2.00986	0.867193	0.624165	0.141751	1.92431	0.134706	2.10109	0.0890209	0.756954	0.309483	1.0796
1200	FBgn0011361_ND-ACP	0.938363	0.0172555	0.996918	0.0187035	0.895001	0.0163879	0.0943859	0.938363	0.0637125	0.0350961	0.0172555	2.53995	0.996918	0.306125	0.0187035	2.89127	0.895001	0.111217	0.0578351	0.0163879	2.40016	1.70672
1201	FBgn0011455_ND-SGDH	0.862041	0.158113	0.943235	0.208712	0.754207	0.0903409	0.433406	0.862041	0.148966	0.0578609	0.158113	1.54658	0.943235	0.509965	0.208712	1.74848	0.754207	0.283948	0.0968982	0.0903409	1.6936	1.29312
1202	FBgn0011474_PR-Set7	0.823744	0.674401	0.543112	0.866955	0.941445	0.893847	0.990904	0.823744	0.194773	0.0245576	0.674401	0.827877	0.543112	0.958667	0.866955	1.07681	0.941445	0.0604245	0.0111335	0.893847	0.133438	1.03036
1203	FBgn0011476_l(3)neo43	0.355791	0.248524	0.80941	0.431073	0.747734	0.468701	0.81991	0.355791	1.05865	0.106096	0.248524	1.3441	0.80941	0.690948	0.431073	1.4171	0.747734	0.292683	0.0826428	0.468701	0.724595	1.19221
1204	FBgn0011481_Ssdp	0.979511	0.171654	0.943695	0.220612	0.94355	0.280041	0.676948	0.979511	0.0207121	0.0199653	0.171654	1.5102	0.943695	0.509072	0.220612	1.72332	0.94355	0.0581847	0.0329236	0.280041	1.08023	1.35007
1205	FBgn0011509_SrpRbeta	0.974837	0.0272355	0.994865	0.0299436	0.957275	0.0815731	0.152682	0.974837	0.0255002	0.0177724	0.0272355	2.32821	0.994865	0.330813	0.0299436	2.65647	0.957275	0.0437089	0.0173279	0.0815731	1.74163	1.56364
1206	FBgn0011554_etaTry	NA	NA	NA	NA	NA	NA	1	NA	NA	NA	NA	NA	NA	NA	NA	NA	NA	NA	NA	NA	NA	NA
1207	FBgn0011555_thetaTry	NA	NA	NA	NA	NA	NA	1	NA	NA	NA	NA	NA	NA	NA	NA	NA	NA	NA	NA	NA	NA	NA
1208	FBgn0011556_zetaTry	NA	NA	NA	NA	NA	NA	1	NA	NA	NA	NA	NA	NA	NA	NA	NA	NA	NA	NA	NA	NA	NA
1209	FBgn0011559_Acp36DE	0.654064	0.831269	0.308513	0.472272	1	0.447574	0.890679	0.654064	0.428769	0.473147	0.831269	0.666722	0.308513	1.24416	0.472272	1.37454	1	0	3.55e-16	0.447574	-0.759466	0.994565
1210	FBgn0011566_Smyd3	0.692925	0.0208894	0.993848	0.0254689	0.778901	0.00767652	0.0451842	0.692925	0.369981	0.134884	0.0208894	2.4506	0.993848	0.340324	0.0254689	2.73639	0.778901	0.251329	0.135398	0.00767652	2.66598	1.82213
1211	FBgn0011569_can	0.580446	0.0392721	0.984058	0.0526233	0.468009	0.069641	0.213674	0.580446	0.550898	0.283892	0.0392721	2.16211	0.984058	0.398812	0.0526233	2.38427	0.468009	0.772834	0.37113	0.069641	1.81424	1.61146
1212	FBgn0011570_cpb	0.538348	0.31838	0.801667	0.511887	0.434389	0.744514	0.899711	0.538348	0.628254	0.0532978	0.31838	1.22934	0.801667	0.699305	0.511887	1.33668	0.434389	0.850195	0.0507907	0.744514	0.325882	1.10508
1213	FBgn0011573_Cdc37	0.943615	0.208447	0.924078	0.27704	0.950934	0.0247307	0.139507	0.943615	0.0581154	0.0455409	0.208447	1.4236	0.924078	0.543984	0.27704	1.6199	0.950934	0.05037	0.0577827	0.0247307	2.24558	1.32096
1214	FBgn0011576_Cyp4d2	0.768401	0.166451	0.932701	0.228116	0.765051	0.441481	0.664582	0.768401	0.265065	0.0590491	0.166451	1.52384	0.932701	0.529354	0.228116	1.70815	0.765051	0.269488	0.050647	0.441481	0.769695	1.24742
1215	FBgn0011581_Ms	0.342064	0.110163	0.917759	0.183987	0.323596	0.260883	0.503564	0.342064	1.09997	0.0622054	0.110163	1.70559	0.917759	0.554135	0.183987	1.8057	0.323596	1.15839	0.0613539	0.260883	1.12431	1.31834
1216	FBgn0011582_Dop1R1	0.634978	0.500468	0.672624	0.825922	0.740185	0.875604	0.984462	0.634978	0.458995	0.0823107	0.500468	1.00354	0.672624	0.829619	0.825922	1.10203	0.740185	0.302969	0.0601661	0.875604	0.156544	1.01588
1217	FBgn0011584_Trp1	0.430755	0.00656057	0.9964	0.00905422	0.332276	0.07258	0.0387234	0.430755	0.858929	0.0580363	0.00656057	3.00958	0.9964	0.313318	0.00905422	3.26897	0.332276	1.13051	0.0523362	0.07258	1.79546	1.78872
1218	FBgn0011586_e(r)	0.376803	0.168681	0.879766	0.281011	0.341737	0.233542	0.669931	0.376803	0.998526	0.0664243	0.168681	1.51795	0.879766	0.608151	0.281011	1.61342	0.341737	1.10098	0.0691291	0.233542	1.19129	1.26596
1219	FBgn0011589_Elk	0.171221	0.134505	0.837545	0.27426	0.242958	0.2853	0.579674	0.171221	1.83925	0.0754737	0.134505	1.61787	0.837545	0.659564	0.27426	1.62448	0.242958	1.46246	0.0689034	0.2853	1.06849	1.30111
1220	FBgn0011591_fng	0.529561	0.00097663	0.99963	0.00117829	0.618222	0.00281594	0.00584549	0.529561	0.645199	0.0769559	0.00097663	4.04099	0.99963	0.228579	0.00117829	4.45459	0.618222	0.486327	0.0518636	0.00281594	2.98715	2.00267
1221	FBgn0011592_fra	0.0572299	0.147946	0.689711	0.399703	0.0191157	0.86963	0.109351	0.0572299	3.05972	0.0827885	0.147946	1.57592	0.689711	0.812857	0.399703	1.45209	0.0191157	4.34483	0.0960669	0.86963	0.164129	1.06205
1222	FBgn0011596_fzo	0.388169	0.072189	0.952618	0.113642	0.221757	0.348425	0.362093	0.388169	0.967449	0.269797	0.072189	1.89133	0.952618	0.490829	0.113642	2.02539	0.221757	1.56018	0.320104	0.348425	0.937648	1.28959
1223	FBgn0011603_ine	0.717445	0.0333623	0.989878	0.0412531	0.648116	0.0230953	0.130813	0.717445	0.334637	0.0908477	0.0333623	2.23576	0.989878	0.368971	0.0412531	2.50067	0.648116	0.438089	0.107313	0.0230953	2.27185	1.67708
1224	FBgn0011604_Iswi	0.889891	0.548508	0.681525	0.86504	0.941025	0.850082	0.99153	0.889891	0.116973	0.0276028	0.548508	0.953111	0.681525	0.820892	0.86504	1.07796	0.941025	0.0608716	0.0235552	0.850082	0.189014	1.00663
1225	FBgn0011606_Klp3A	0.132301	0.43372	0.487248	0.943221	0.120273	0.91998	0.53646	0.132301	2.12087	0.244167	0.43372	1.07835	0.487248	1.01786	0.943221	1.03196	0.120273	2.22583	0.236854	0.91998	0.100459	1.01509
1226	FBgn0011638_La	0.388054	0.000751976	0.999453	0.00102178	0.505008	0.00293431	0.00450338	0.388054	0.967758	0.128371	0.000751976	4.19554	0.999453	0.240557	0.00102178	4.5453	0.505008	0.694151	0.104938	0.00293431	2.97454	2.09532
1227	FBgn0011640_lark	0.487499	0.0615169	0.968085	0.0894462	0.49727	0.0640115	0.316783	0.487499	0.730607	0.0742105	0.0615169	1.96198	0.968085	0.453358	0.0894462	2.1357	0.49727	0.710097	0.0754172	0.0640115	1.8521	1.48811
1228	FBgn0011642_Zyx	0.951862	0.0462535	0.989608	0.0531677	0.917763	0.0352681	0.193805	0.951862	0.0493915	0.0377418	0.0462535	2.08875	0.989608	0.370597	0.0531677	2.37939	0.917763	0.0859871	0.0604459	0.0352681	2.10527	1.4539
1229	FBgn0011648_Mad	0.39	0.546976	0.549582	0.997354	0.441581	0.595371	0.94848	0.39	0.962532	0.0438909	0.546976	0.954686	0.549582	0.952007	0.997354	1.00147	0.441581	0.833131	0.0417275	0.595371	-0.53107	0.910573
1230	FBgn0011653_mas	NA	NA	NA	NA	NA	NA	1	NA	NA	NA	NA	NA	NA	NA	NA	NA	NA	NA	NA	NA	NA	NA
1231	FBgn0011655_Med	0.170353	0.796834	0.172028	0.352815	0.279993	0.222794	0.673892	0.170353	1.84477	0.0832386	0.796834	0.70447	0.172028	1.50924	0.352815	1.50952	0.279993	1.31143	0.0740938	0.222794	-1.21913	0.792149
1232	FBgn0011656_Mef2	0.76918	0.0301401	0.991829	0.0361775	0.691092	0.0387616	0.167749	0.76918	0.264039	0.039757	0.0301401	2.28192	0.991829	0.356182	0.0361775	2.56414	0.691092	0.372675	0.0469288	0.0387616	2.06671	1.64472
1233	FBgn0011659_Mlh1	0.563064	0.237793	0.865563	0.366854	0.369626	0.299907	0.803918	0.563064	0.582102	0.155585	0.237793	1.36418	0.865563	0.62619	0.366854	1.4916	0.369626	1.01866	0.184828	0.299907	1.03663	1.2595
1234	FBgn0011660_Pms2	0.631435	0.843118	0.286397	0.438184	0.672855	0.555278	0.86795	0.631435	0.464712	0.0789649	0.843118	0.653122	0.286397	1.27888	0.438184	1.40949	0.672855	0.399899	0.0634102	0.555278	-0.58987	0.876963
1235	FBgn0011661_Moe	0.0551502	0.000478993	0.991712	0.00141701	0.0242605	0.0163247	0.00287052	0.0551502	3.10204	0.0900435	0.000478993	4.47047	0.991712	0.357011	0.00141701	4.33882	0.0242605	4.05991	0.0877279	0.0163247	2.40158	2.45741
1236	FBgn0011666_msi	0.877502	0.704314	0.520312	0.813382	0.967835	0.434327	0.967236	0.877502	0.131074	0.0805487	0.704314	0.798489	0.520312	0.982431	0.813382	1.10992	0.967835	0.0327183	0.028404	0.434327	-0.781808	0.91337
1237	FBgn0011668_Mst57Da	NA	NA	NA	NA	NA	NA	1	NA	NA	NA	NA	NA	NA	NA	NA	NA	NA	NA	NA	NA	NA	NA
1238	FBgn0011669_Mst57Db	NA	NA	NA	NA	NA	NA	1	NA	NA	NA	NA	NA	NA	NA	NA	NA	NA	NA	NA	NA	NA	NA
1239	FBgn0011670_Mst57Dc	NA	NA	NA	NA	NA	NA	1	NA	NA	NA	NA	NA	NA	NA	NA	NA	NA	NA	NA	NA	NA	NA
1240	FBgn0011672_Mvl	0.886681	0.00522108	0.9992	0.00544708	0.818912	0.0997366	0.0309204	0.886681	0.120607	0.027749	0.00522108	3.12526	0.9992	0.253034	0.00544708	3.54622	0.818912	0.20071	0.0308224	0.0997366	1.64613	1.50046
1241	FBgn0011674_insc	0.620333	0.100873	0.95583	0.140708	0.651035	0.0853673	0.414563	0.620333	0.482841	0.0755103	0.100873	1.74425	0.95583	0.483758	0.140708	1.92768	0.651035	0.433504	0.0670739	0.0853673	1.72036	1.37849
1242	FBgn0011676_Nos	0.65119	0.229664	0.884054	0.340226	0.675879	0.156039	0.638645	0.65119	0.433261	0.079389	0.229664	1.37994	0.884054	0.602518	0.340226	1.52617	0.675879	0.395332	0.0794291	0.156039	1.41852	1.20453
1243	FBgn0011692_pav	0.373128	0.951179	0.0717333	0.114265	0.174278	0.776659	0.360211	0.373128	1.00879	0.653592	0.951179	0.493903	0.0717333	1.89412	0.114265	2.02288	0.174278	1.82005	0.727522	0.776659	-0.283676	0.848885
1244	FBgn0011693_Pdh	0.858479	0.592197	0.634976	0.956616	0.91481	0.958422	0.995401	0.858479	0.153135	0.0224082	0.592197	0.908894	0.634976	0.866544	0.956616	1.02432	0.91481	0.0892232	0.0171179	0.958422	-0.0521339	0.998853
1245	FBgn0011694_EbpII	NA	NA	NA	NA	NA	NA	1	NA	NA	NA	NA	NA	NA	NA	NA	NA	NA	NA	NA	NA	NA	NA
1246	FBgn0011695_EbpIII	0.850145	0.0499295	0.986754	0.0599018	0.862259	0.0234141	0.132513	0.850145	0.162963	0.0767137	0.0499295	2.05463	0.986754	0.386161	0.0599018	2.32297	0.862259	0.148712	0.0817848	0.0234141	2.26661	1.57943
1247	FBgn0011701_repo	0.0257321	0.00581353	0.930935	0.0222673	0.0135581	0.0990885	0.0343781	0.0257321	3.99	0.0908149	0.00581353	3.07057	0.930935	0.532431	0.0222673	2.80338	0.0135581	4.76111	0.112767	0.0990885	1.64929	1.59031
1248	FBgn0011703_RnrL	0.059825	0.0121286	0.944587	0.0341821	0.0441455	0.680124	0.0706002	0.059825	3.00912	0.390287	0.0121286	2.70761	0.944587	0.507329	0.0341821	2.59172	0.0441455	3.35805	0.280676	0.680124	-0.412294	0.898427
1249	FBgn0011704_RnrS	0.367439	0.270638	0.794547	0.468678	0.454884	0.833419	0.849458	0.367439	1.02488	0.142901	0.270638	1.30504	0.794547	0.706902	0.468678	1.37811	0.454884	0.80232	0.113721	0.833419	-0.210318	0.995087
1250	FBgn0011705_rost	0.0931795	0.00071768	0.994563	0.00172354	0.047622	0.00873495	0.00429836	0.0931795	2.50916	0.146479	0.00071768	4.22351	0.994563	0.333776	0.00172354	4.21791	0.047622	3.27056	0.161961	0.00873495	2.62226	2.02226
1251	FBgn0011706_rpr	0.0743308	0.972938	0.00552827	0.0144973	0.0607381	0.0463207	0.0327145	0.0743308	2.76287	0.278457	0.972938	0.439236	0.00552827	3.09611	0.0144973	3.02161	0.0607381	2.99185	0.285419	0.0463207	-1.99246	0.58507
1252	FBgn0011708_Syx5	0.237779	0.585256	0.429364	0.839468	0.264666	0.994275	0.803896	0.237779	1.48548	0.0753844	0.585256	0.915839	0.429364	1.08348	0.839468	1.09361	0.264666	1.37124	0.0622644	0.994275	0.00717556	1.00051
1253	FBgn0011710_Sep1	0.829094	0.414253	0.78222	0.627436	0.969902	0.43588	0.959611	0.829094	0.188241	0.0284377	0.414253	1.10155	0.78222	0.719879	0.627436	1.23931	0.969902	0.0305817	0.0087979	0.43588	0.779169	1.32195
1254	FBgn0011715_Snr1	0.68537	0.486534	0.696637	0.78751	0.935068	0.682979	0.981674	0.68537	0.381135	0.130186	0.486534	1.01864	0.696637	0.806049	0.78751	1.12646	0.935068	0.0672406	0.0453275	0.682979	0.408401	1.114
1255	FBgn0011722_Tig	0.616067	0.00592414	0.998191	0.00712808	0.373622	0.00639394	0.0350225	0.616067	0.489898	0.113844	0.00592414	3.06102	0.998191	0.283302	0.00712808	3.39809	0.373622	1.0074	0.168384	0.00639394	2.72686	1.88813
1256	FBgn0011723_byn	NA	NA	NA	NA	NA	NA	1	NA	NA	NA	NA	NA	NA	NA	NA	NA	NA	NA	NA	NA	NA	NA
1257	FBgn0011725_twin	0.350778	0.0202584	0.985494	0.0312535	0.374012	0.0157793	0.0910185	0.350778	1.07354	0.0613852	0.0202584	2.46487	0.985494	0.392278	0.0312535	2.63547	0.374012	1.00631	0.0623149	0.0157793	2.41398	1.90487
1258	FBgn0011726_tsr	0.0223257	0.0134476	0.880342	0.052722	0.0349468	0.041563	0.0780209	0.0223257	4.15891	0.146598	0.0134476	2.65812	0.880342	0.607399	0.052722	2.38338	0.0349468	3.62968	0.119527	0.041563	2.03787	1.78335
1259	FBgn0011737_Wee1	0.1403	0.0296488	0.948061	0.0627944	0.230989	0.0399303	0.165217	0.1403	2.05647	0.109198	0.0296488	2.28941	0.948061	0.500381	0.0627944	2.30075	0.230989	1.51648	0.0863818	0.0399303	2.05447	1.54514
1260	FBgn0011739_wts	0.461255	0.531069	0.592896	0.937378	0.401746	0.756438	0.954153	0.461255	0.787898	0.0365539	0.531069	0.971159	0.592896	0.908196	0.937378	1.03531	0.401746	0.931551	0.036321	0.756438	0.310162	1.07286
1261	FBgn0011740_alpha-Man-IIa	0.861563	0.450031	0.759729	0.686156	0.815622	0.961517	0.972329	0.861563	0.149525	0.039939	0.450031	1.05944	0.759729	0.743074	0.686156	1.19552	0.815622	0.204774	0.0508643	0.961517	0.0482506	1.01122
1262	FBgn0011741_Arp6	0.923464	0.0907086	0.97438	0.111175	0.950586	0.0329445	0.182085	0.923464	0.0797712	0.042264	0.0907086	1.79088	0.97438	0.43472	0.111175	2.03546	0.950586	0.0507366	0.040278	0.0329445	2.13276	1.46294
1263	FBgn0011742_Arp2	0.846325	0.000642977	0.999922	0.000634374	0.714707	0.00632118	0.00380021	0.846325	0.167501	0.0176773	0.000642977	4.28979	0.999922	0.188373	0.000634374	4.85699	0.714707	0.33852	0.0222654	0.00632118	2.73064	2.02364
1264	FBgn0011743_Arp53D	0.214458	0.627701	0.369955	0.733657	1	0.0360781	0.197858	0.214458	1.59611	2.53875	0.627701	0.873703	0.369955	1.15742	0.733657	1.16224	1	0	1.06e-16	0.0360781	2.09605	2.53307
1265	FBgn0011745_Arp1	0.813453	0.0129107	0.99726	0.0145053	0.782789	0.00656956	0.0387756	0.813453	0.207461	0.040481	0.0129107	2.67761	0.99726	0.300846	0.0145053	3.02133	0.782789	0.246292	0.0383667	0.00656956	2.71791	1.82302
1266	FBgn0011746_ana	0.653945	0.942321	0.131178	0.184019	0.487509	0.154837	0.569884	0.653945	0.428955	0.0610417	0.942321	0.511725	0.131178	1.62889	0.184019	1.80562	0.487509	0.730585	0.0760564	0.154837	-1.42265	0.776528
1267	FBgn0011747_Ank	0.76577	0.0180738	0.995515	0.0211128	0.989025	0.0575046	0.103659	0.76577	0.268536	0.0667041	0.0180738	2.51819	0.995515	0.323967	0.0211128	2.8301	0.989025	0.0110381	0.00964405	0.0575046	1.89946	1.60957
1268	FBgn0011754_PhKgamma	0.869281	0.258984	0.890729	0.361583	0.445557	0.442495	0.834436	0.869281	0.140546	0.0273414	0.258984	1.32526	0.890729	0.593552	0.361583	1.49825	0.445557	0.823823	0.0555324	0.442495	0.767988	1.19635
1269	FBgn0011758_B-H1	0.895949	0.126365	0.959246	0.161228	0.86985	0.109826	0.502437	0.895949	0.110153	0.0485396	0.126365	1.64533	0.959246	0.475881	0.161228	1.86569	0.86985	0.139888	0.0579407	0.109826	1.59897	1.32755
1270	FBgn0011760_ctp	0.152519	0.00173312	0.99485	0.00345179	0.282233	0.113319	0.0103538	0.152519	1.96515	0.0893635	0.00173312	3.71355	0.99485	0.330964	0.00345179	3.80488	0.282233	1.30298	0.0576815	0.113319	1.58345	2.19585
1271	FBgn0011761_dhd	0.192108	0.999844	2.21e-05	3.84e-05	1	0.0977873	0.000132534	0.192108	1.71464	2.04582	0.999844	0.205027	2.21e-05	6.66974	3.84e-05	6.9857	1	5.92e-14	1.81e-14	0.0977873	1.65568	2.81429
1272	FBgn0011762_DNApol-alpha50	0.908085	0.0423179	0.990112	0.049096	0.743193	0.0813798	0.228514	0.908085	0.0966343	0.0327082	0.0423179	2.12856	0.990112	0.367536	0.049096	2.41728	0.743193	0.298858	0.0494879	0.0813798	1.74274	1.58953
1273	FBgn0011763_Dp	0.147691	0.150853	0.803822	0.320374	0.0470722	0.414892	0.25121	0.147691	2.00028	0.0541052	0.150853	1.56734	0.803822	0.696989	0.320374	1.55366	0.0470722	3.28394	0.0828056	0.414892	0.815314	1.23354
1274	FBgn0011766_E2f1	0.738016	2.58e-05	0.999996	2.51e-05	0.352975	0.00231498	0.000150554	0.738016	0.305946	0.0393761	2.58e-05	6.54316	0.999996	0.133046	2.51e-05	7.35895	0.352975	1.06699	0.0685824	0.00231498	3.04653	2.85563
1275	FBgn0011768_Fdh	0.312551	0.0160577	0.986693	0.0255915	0.163945	0.0981944	0.09256	0.312551	1.19502	0.186954	0.0160577	2.57386	0.986693	0.386466	0.0255915	2.73401	0.163945	1.88644	0.226832	0.0981944	1.65367	1.53737
1276	FBgn0011769_Fdx1	0.873003	0.0511797	0.98679	0.0609794	0.851965	0.0117659	0.068551	0.873003	0.136246	0.081631	0.0511797	2.04362	0.98679	0.385982	0.0609794	2.31456	0.851965	0.160808	0.0814267	0.0117659	2.51909	1.52416
1277	FBgn0011770_Gip	0.127479	0.00119958	0.99496	0.00255337	0.0860846	0.0336127	0.00717595	0.127479	2.1617	0.236934	0.00119958	3.9218	0.99496	0.329856	0.00255337	3.98123	0.0860846	2.59777	0.243344	0.0336127	2.12469	1.84343
1278	FBgn0011771_Hem	0.777466	0.153925	0.939763	0.208608	0.712116	0.224406	0.633179	0.777466	0.253194	0.0410945	0.153925	1.55844	0.939763	0.516567	0.208608	1.74871	0.712116	0.34221	0.0530075	0.224406	1.2149	1.47573
1279	FBgn0011774_Irbp	0.966888	0.0518774	0.988211	0.0598378	0.975553	0.0271335	0.152149	0.966888	0.0336988	0.0317817	0.0518774	2.03759	0.988211	0.378554	0.0598378	2.32347	0.975553	0.0247649	0.0337495	0.0271335	2.20959	1.53283
1280	FBgn0011785_BRWD3	0.849801	0.303366	0.86183	0.435287	0.83157	0.213271	0.76289	0.849801	0.163371	0.0608454	0.303366	1.25205	0.86183	0.630791	0.435287	1.41258	0.83157	0.185233	0.0679947	0.213271	1.24462	1.21363
1281	FBgn0011787_mRpL12	0.869316	0.0601716	0.983729	0.0726633	0.768916	0.13707	0.310885	0.869316	0.140506	0.123641	0.0601716	1.97176	0.983729	0.400249	0.0726633	2.23232	0.768916	0.264386	0.189446	0.13707	1.48679	1.43525
1282	FBgn0011802_Gem3	0.845908	0.0131318	0.997379	0.0145587	0.888129	0.0814688	0.0762492	0.845908	0.167998	0.038742	0.0131318	2.66948	0.997379	0.298891	0.0145587	3.01943	0.888129	0.118967	0.024376	0.0814688	1.74223	1.79243
1283	FBgn0011812_Lcp1Psi	NA	NA	NA	NA	NA	NA	1	NA	NA	NA	NA	NA	NA	NA	NA	NA	NA	NA	NA	NA	NA	NA
1284	FBgn0011817_nmo	0.622045	0.109136	0.951615	0.153032	0.550087	0.111307	0.500116	0.622045	0.480023	0.0789322	0.109136	1.7097	0.951615	0.492978	0.153032	1.88943	0.550087	0.606064	0.0752735	0.111307	1.59234	1.34244
1285	FBgn0011818_oaf	0.474242	0.999598	0.000837828	0.00105266	0.466809	0.00223342	0.00501645	0.474242	0.759131	0.112057	0.999598	0.231037	0.000837828	4.13121	0.00105266	4.52626	0.466809	0.775494	0.107992	0.00223342	-3.0573	0.360379
1286	FBgn0011822_Pgcl	NA	NA	NA	NA	NA	NA	1	NA	NA	NA	NA	NA	NA	NA	NA	NA	NA	NA	NA	NA	NA	NA
1287	FBgn0011824_CG4038	0.122733	0.0337577	0.935498	0.0747458	0.0759778	0.0973322	0.186203	0.122733	2.20349	0.130859	0.0337577	2.23042	0.935498	0.524387	0.0747458	2.21913	0.0759778	2.73815	0.146957	0.0973322	1.65793	1.59995
1288	FBgn0011826_Pp2B-14D	0.599556	0.35646	0.785315	0.566829	0.414163	0.470465	0.928968	0.599556	0.5177	0.0471122	0.35646	1.17543	0.785315	0.71664	0.566829	1.28825	0.414163	0.899815	0.0520707	0.470465	0.721723	1.14421
1289	FBgn0011828_Pxn	0.729823	0.00997151	0.997574	0.0115122	0.554709	0.0199157	0.0583573	0.729823	0.317272	0.0839637	0.00997151	2.80244	0.997574	0.295536	0.0115122	3.14167	0.554709	0.597463	0.127089	0.0199157	2.32793	1.98221
1290	FBgn0011829_Ret	0.535411	0.302836	0.81296	0.48487	0.647023	0.350137	0.885182	0.535411	0.633886	0.0853309	0.302836	1.25286	0.81296	0.687079	0.48487	1.3622	0.647023	0.439812	0.0697484	0.350137	0.934323	1.24664
1291	FBgn0011832_Ser12	NA	NA	NA	NA	NA	NA	1	NA	NA	NA	NA	NA	NA	NA	NA	NA	NA	NA	NA	NA	NA	NA
1292	FBgn0011834_Ser6	NA	NA	NA	NA	NA	NA	1	NA	NA	NA	NA	NA	NA	NA	NA	NA	NA	NA	NA	NA	NA	NA
1293	FBgn0011836_Taf2	0.885482	0.461559	0.754362	0.703122	0.892189	0.738764	0.975632	0.885482	0.121968	0.0368293	0.461559	1.04634	0.754362	0.748533	0.703122	1.18343	0.892189	0.11438	0.0392839	0.738764	0.33349	1.07145
1294	FBgn0011837_Tis11	0.870775	0.113214	0.963644	0.144137	0.904852	0.123572	0.513689	0.870775	0.138818	0.048241	0.113214	1.69359	0.963644	0.46511	0.144137	1.9167	0.904852	0.100217	0.0443619	0.123572	1.53995	1.60337
1295	FBgn0011840_tRNA:Ala-AGC-2-3	NA	NA	NA	NA	NA	NA	1	NA	NA	NA	NA	NA	NA	NA	NA	NA	NA	NA	NA	NA	NA	NA
1296	FBgn0011844_tRNA:Asp-GTC-1-10	NA	NA	NA	NA	NA	NA	1	NA	NA	NA	NA	NA	NA	NA	NA	NA	NA	NA	NA	NA	NA	NA
1297	FBgn0011845_tRNA:Asp-GTC-1-11	NA	NA	NA	NA	NA	NA	1	NA	NA	NA	NA	NA	NA	NA	NA	NA	NA	NA	NA	NA	NA	NA
1298	FBgn0011848_tRNA:Glu-TTC-1-6	NA	NA	NA	NA	NA	NA	1	NA	NA	NA	NA	NA	NA	NA	NA	NA	NA	NA	NA	NA	NA	NA
1299	FBgn0011849_tRNA:Glu-TTC-1-5	NA	NA	NA	NA	NA	NA	1	NA	NA	NA	NA	NA	NA	NA	NA	NA	NA	NA	NA	NA	NA	NA
1300	FBgn0011850_tRNA:Glu-TTC-1-4	NA	NA	NA	NA	NA	NA	1	NA	NA	NA	NA	NA	NA	NA	NA	NA	NA	NA	NA	NA	NA	NA
1301	FBgn0011851_tRNA:Glu-CTC-3-4	NA	NA	NA	NA	NA	NA	1	NA	NA	NA	NA	NA	NA	NA	NA	NA	NA	NA	NA	NA	NA	NA
1302	FBgn0011852_tRNA:Glu-CTC-3-5	NA	NA	NA	NA	NA	NA	1	NA	NA	NA	NA	NA	NA	NA	NA	NA	NA	NA	NA	NA	NA	NA
1303	FBgn0011853_tRNA:Glu-CTC-3-6	NA	NA	NA	NA	NA	NA	1	NA	NA	NA	NA	NA	NA	NA	NA	NA	NA	NA	NA	NA	NA	NA
1304	FBgn0011854_tRNA:Glu-CTC-3-8	NA	NA	NA	NA	NA	NA	1	NA	NA	NA	NA	NA	NA	NA	NA	NA	NA	NA	NA	NA	NA	NA
1305	FBgn0011855_tRNA:Glu-CTC-3-9	NA	NA	NA	NA	NA	NA	1	NA	NA	NA	NA	NA	NA	NA	NA	NA	NA	NA	NA	NA	NA	NA
1306	FBgn0011858_tRNA:Phe-GAA-1-8	NA	NA	NA	NA	NA	NA	1	NA	NA	NA	NA	NA	NA	NA	NA	NA	NA	NA	NA	NA	NA	NA
1307	FBgn0011859_tRNA:Gly-GCC-1-1	NA	NA	NA	NA	NA	NA	1	NA	NA	NA	NA	NA	NA	NA	NA	NA	NA	NA	NA	NA	NA	NA
1308	FBgn0011860_tRNA:Gly-GCC-1-2	NA	NA	NA	NA	NA	NA	1	NA	NA	NA	NA	NA	NA	NA	NA	NA	NA	NA	NA	NA	NA	NA
1309	FBgn0011861_tRNA:Gly-GCC-1-3	NA	NA	NA	NA	NA	NA	1	NA	NA	NA	NA	NA	NA	NA	NA	NA	NA	NA	NA	NA	NA	NA
1310	FBgn0011862_tRNA:Gly-GCC-1-4	NA	NA	NA	NA	NA	NA	1	NA	NA	NA	NA	NA	NA	NA	NA	NA	NA	NA	NA	NA	NA	NA
1311	FBgn0011863_tRNA:Gly-GCC-1-5	NA	NA	NA	NA	NA	NA	1	NA	NA	NA	NA	NA	NA	NA	NA	NA	NA	NA	NA	NA	NA	NA
1312	FBgn0011864_tRNA:Gly-GCC-1-6	NA	NA	NA	NA	NA	NA	1	NA	NA	NA	NA	NA	NA	NA	NA	NA	NA	NA	NA	NA	NA	NA
1313	FBgn0011865_tRNA:Gly-GCC-1-7	NA	NA	NA	NA	NA	NA	1	NA	NA	NA	NA	NA	NA	NA	NA	NA	NA	NA	NA	NA	NA	NA
1314	FBgn0011866_tRNA:Gly-GCC-2-1	NA	NA	NA	NA	NA	NA	1	NA	NA	NA	NA	NA	NA	NA	NA	NA	NA	NA	NA	NA	NA	NA
1315	FBgn0011867_tRNA:Gly-GCC-1-8	NA	NA	NA	NA	NA	NA	1	NA	NA	NA	NA	NA	NA	NA	NA	NA	NA	NA	NA	NA	NA	NA
1316	FBgn0011868_tRNA:Gly-GCC-1-9	NA	NA	NA	NA	NA	NA	1	NA	NA	NA	NA	NA	NA	NA	NA	NA	NA	NA	NA	NA	NA	NA
1317	FBgn0011869_tRNA:Gly-GCC-1-10	NA	NA	NA	NA	NA	NA	1	NA	NA	NA	NA	NA	NA	NA	NA	NA	NA	NA	NA	NA	NA	NA
1318	FBgn0011870_tRNA:Gly-GCC-1-11	NA	NA	NA	NA	NA	NA	1	NA	NA	NA	NA	NA	NA	NA	NA	NA	NA	NA	NA	NA	NA	NA
1319	FBgn0011871_tRNA:Gly-GCC-1-12	NA	NA	NA	NA	NA	NA	1	NA	NA	NA	NA	NA	NA	NA	NA	NA	NA	NA	NA	NA	NA	NA
1320	FBgn0011872_tRNA:Gly-GCC-1-13	NA	NA	NA	NA	NA	NA	1	NA	NA	NA	NA	NA	NA	NA	NA	NA	NA	NA	NA	NA	NA	NA
1321	FBgn0011877_tRNA:His-GTG-2-1Psi	NA	NA	NA	NA	NA	NA	1	NA	NA	NA	NA	NA	NA	NA	NA	NA	NA	NA	NA	NA	NA	NA
1322	FBgn0011878_tRNA:His-GTG-1-4	NA	NA	NA	NA	NA	NA	1	NA	NA	NA	NA	NA	NA	NA	NA	NA	NA	NA	NA	NA	NA	NA
1323	FBgn0011879_tRNA:Ala-TGC-2-1	NA	NA	NA	NA	NA	NA	1	NA	NA	NA	NA	NA	NA	NA	NA	NA	NA	NA	NA	NA	NA	NA
1324	FBgn0011880_tRNA:Ile-AAT-1-1	NA	NA	NA	NA	NA	NA	1	NA	NA	NA	NA	NA	NA	NA	NA	NA	NA	NA	NA	NA	NA	NA
1325	FBgn0011881_tRNA:Ile-AAT-1-3	NA	NA	NA	NA	NA	NA	1	NA	NA	NA	NA	NA	NA	NA	NA	NA	NA	NA	NA	NA	NA	NA
1326	FBgn0011882_tRNA:Ile-AAT-1-4	NA	NA	NA	NA	NA	NA	1	NA	NA	NA	NA	NA	NA	NA	NA	NA	NA	NA	NA	NA	NA	NA
1327	FBgn0011883_tRNA:Ile-AAT-1-5	NA	NA	NA	NA	NA	NA	1	NA	NA	NA	NA	NA	NA	NA	NA	NA	NA	NA	NA	NA	NA	NA
1328	FBgn0011884_tRNA:Ile-AAT-1-6	NA	NA	NA	NA	NA	NA	1	NA	NA	NA	NA	NA	NA	NA	NA	NA	NA	NA	NA	NA	NA	NA
1329	FBgn0011885_tRNA:Ile-AAT-1-7	NA	NA	NA	NA	NA	NA	1	NA	NA	NA	NA	NA	NA	NA	NA	NA	NA	NA	NA	NA	NA	NA
1330	FBgn0011887_tRNA:Lys-CTT-1-4	NA	NA	NA	NA	NA	NA	1	NA	NA	NA	NA	NA	NA	NA	NA	NA	NA	NA	NA	NA	NA	NA
1331	FBgn0011888_tRNA:Lys-CTT-1-3	NA	NA	NA	NA	NA	NA	1	NA	NA	NA	NA	NA	NA	NA	NA	NA	NA	NA	NA	NA	NA	NA
1332	FBgn0011889_tRNA:Lys-CTT-1-2	NA	NA	NA	NA	NA	NA	1	NA	NA	NA	NA	NA	NA	NA	NA	NA	NA	NA	NA	NA	NA	NA
1333	FBgn0011890_tRNA:Lys-CTT-1-5	NA	NA	NA	NA	NA	NA	1	NA	NA	NA	NA	NA	NA	NA	NA	NA	NA	NA	NA	NA	NA	NA
1334	FBgn0011891_tRNA:Lys-CTT-1-1	NA	NA	NA	NA	NA	NA	1	NA	NA	NA	NA	NA	NA	NA	NA	NA	NA	NA	NA	NA	NA	NA
1335	FBgn0011892_tRNA:Lys-CTT-1-6	NA	NA	NA	NA	NA	NA	1	NA	NA	NA	NA	NA	NA	NA	NA	NA	NA	NA	NA	NA	NA	NA
1336	FBgn0011893_tRNA:Lys-CTT-1-7	NA	NA	NA	NA	NA	NA	1	NA	NA	NA	NA	NA	NA	NA	NA	NA	NA	NA	NA	NA	NA	NA
1337	FBgn0011894_tRNA:Lys-CTT-1-8	NA	NA	NA	NA	NA	NA	1	NA	NA	NA	NA	NA	NA	NA	NA	NA	NA	NA	NA	NA	NA	NA
1338	FBgn0011895_tRNA:Lys-CTT-1-9	NA	NA	NA	NA	NA	NA	1	NA	NA	NA	NA	NA	NA	NA	NA	NA	NA	NA	NA	NA	NA	NA
1339	FBgn0011896_tRNA:Lys-CTT-1-10	NA	NA	NA	NA	NA	NA	1	NA	NA	NA	NA	NA	NA	NA	NA	NA	NA	NA	NA	NA	NA	NA
1340	FBgn0011897_tRNA:Lys-CTT-1-11	NA	NA	NA	NA	NA	NA	1	NA	NA	NA	NA	NA	NA	NA	NA	NA	NA	NA	NA	NA	NA	NA
1341	FBgn0011902_tRNA:Lys-TTT-1-1	NA	NA	NA	NA	NA	NA	1	NA	NA	NA	NA	NA	NA	NA	NA	NA	NA	NA	NA	NA	NA	NA
1342	FBgn0011904_tRNA:Lys-TTT-2-4	NA	NA	NA	NA	NA	NA	1	NA	NA	NA	NA	NA	NA	NA	NA	NA	NA	NA	NA	NA	NA	NA
1343	FBgn0011905_tRNA:Lys-TTT-2-5	NA	NA	NA	NA	NA	NA	1	NA	NA	NA	NA	NA	NA	NA	NA	NA	NA	NA	NA	NA	NA	NA
1344	FBgn0011906_tRNA:Leu-CAG-1-1	0.447015	0.941816	0.0984331	0.151093	1	0.0631043	0.323687	0.447015	0.82043	2.21285	0.941816	0.512692	0.0984331	1.755	0.151093	1.89523	1	0	2.88e-17	0.0631043	-1.85846	0.600649
1345	FBgn0011909_tRNA:Leu-CAA-2-1	NA	NA	NA	NA	NA	NA	1	NA	NA	NA	NA	NA	NA	NA	NA	NA	NA	NA	NA	NA	NA	NA
1346	FBgn0011910_tRNA:Leu-CAA-1-1	NA	NA	NA	NA	NA	NA	1	NA	NA	NA	NA	NA	NA	NA	NA	NA	NA	NA	NA	NA	NA	NA
1347	FBgn0011915_tRNA:Met-CAT-1-1	NA	NA	NA	NA	NA	NA	1	NA	NA	NA	NA	NA	NA	NA	NA	NA	NA	NA	NA	NA	NA	NA
1348	FBgn0011916_tRNA:Met-CAT-1-2	NA	NA	NA	NA	NA	NA	1	NA	NA	NA	NA	NA	NA	NA	NA	NA	NA	NA	NA	NA	NA	NA
1349	FBgn0011919_tRNA:Met-CAT-1-5	NA	NA	NA	NA	NA	NA	1	NA	NA	NA	NA	NA	NA	NA	NA	NA	NA	NA	NA	NA	NA	NA
1350	FBgn0011921_tRNA:iMet-CAT-2-1	NA	NA	NA	NA	NA	NA	1	NA	NA	NA	NA	NA	NA	NA	NA	NA	NA	NA	NA	NA	NA	NA
1351	FBgn0011927_tRNA:iMet-CAT-1-4	NA	NA	NA	NA	NA	NA	1	NA	NA	NA	NA	NA	NA	NA	NA	NA	NA	NA	NA	NA	NA	NA
1352	FBgn0011928_tRNA:iMet-CAT-1-5	NA	NA	NA	NA	NA	NA	1	NA	NA	NA	NA	NA	NA	NA	NA	NA	NA	NA	NA	NA	NA	NA
1353	FBgn0011931_tRNA:Asn-GTT-1-6	NA	NA	NA	NA	NA	NA	1	NA	NA	NA	NA	NA	NA	NA	NA	NA	NA	NA	NA	NA	NA	NA
1354	FBgn0011932_tRNA:Asn-GTT-1-5	NA	NA	NA	NA	NA	NA	1	NA	NA	NA	NA	NA	NA	NA	NA	NA	NA	NA	NA	NA	NA	NA
1355	FBgn0011933_tRNA:Asn-GTT-1-4	NA	NA	NA	NA	NA	NA	1	NA	NA	NA	NA	NA	NA	NA	NA	NA	NA	NA	NA	NA	NA	NA
1356	FBgn0011934_tRNA:Asn-GTT-1-8	NA	NA	NA	NA	NA	NA	1	NA	NA	NA	NA	NA	NA	NA	NA	NA	NA	NA	NA	NA	NA	NA
1357	FBgn0011935_tRNA:Asn-GTT-1-7	NA	NA	NA	NA	NA	NA	1	NA	NA	NA	NA	NA	NA	NA	NA	NA	NA	NA	NA	NA	NA	NA
1358	FBgn0011936_tRNA:Asn-GTT-1-3	NA	NA	NA	NA	NA	NA	1	NA	NA	NA	NA	NA	NA	NA	NA	NA	NA	NA	NA	NA	NA	NA
1359	FBgn0011937_tRNA:Asn-GTT-1-2	NA	NA	NA	NA	NA	NA	1	NA	NA	NA	NA	NA	NA	NA	NA	NA	NA	NA	NA	NA	NA	NA
1360	FBgn0011938_tRNA:Asn-GTT-1-1	NA	NA	NA	NA	NA	NA	1	NA	NA	NA	NA	NA	NA	NA	NA	NA	NA	NA	NA	NA	NA	NA
1361	FBgn0011944_tRNA:Pro-TGG-1-1	NA	NA	NA	NA	NA	NA	1	NA	NA	NA	NA	NA	NA	NA	NA	NA	NA	NA	NA	NA	NA	NA
1362	FBgn0011945_tRNA:Pro-TGG-1-2	NA	NA	NA	NA	NA	NA	1	NA	NA	NA	NA	NA	NA	NA	NA	NA	NA	NA	NA	NA	NA	NA
1363	FBgn0011948_tRNA:Arg-TCG-3-1	NA	NA	NA	NA	NA	NA	1	NA	NA	NA	NA	NA	NA	NA	NA	NA	NA	NA	NA	NA	NA	NA
1364	FBgn0011949_tRNA:Arg-TCG-3-2	NA	NA	NA	NA	NA	NA	1	NA	NA	NA	NA	NA	NA	NA	NA	NA	NA	NA	NA	NA	NA	NA
1365	FBgn0011950_tRNA:Arg-TCG-3-3	NA	NA	NA	NA	NA	NA	1	NA	NA	NA	NA	NA	NA	NA	NA	NA	NA	NA	NA	NA	NA	NA
1366	FBgn0011951_tRNA:Arg-TCG-3-4	NA	NA	NA	NA	NA	NA	1	NA	NA	NA	NA	NA	NA	NA	NA	NA	NA	NA	NA	NA	NA	NA
1367	FBgn0011952_tRNA:Arg-TCG-2-1	NA	NA	NA	NA	NA	NA	1	NA	NA	NA	NA	NA	NA	NA	NA	NA	NA	NA	NA	NA	NA	NA
1368	FBgn0011953_tRNA:Arg-TCG-1-1	NA	NA	NA	NA	NA	NA	1	NA	NA	NA	NA	NA	NA	NA	NA	NA	NA	NA	NA	NA	NA	NA
1369	FBgn0011954_tRNA:Arg-TCG-2-2	NA	NA	NA	NA	NA	NA	1	NA	NA	NA	NA	NA	NA	NA	NA	NA	NA	NA	NA	NA	NA	NA
1370	FBgn0011955_tRNA:Arg-ACG-1-5	NA	NA	NA	NA	NA	NA	1	NA	NA	NA	NA	NA	NA	NA	NA	NA	NA	NA	NA	NA	NA	NA
1371	FBgn0011956_tRNA:Arg-ACG-1-3	NA	NA	NA	NA	NA	NA	1	NA	NA	NA	NA	NA	NA	NA	NA	NA	NA	NA	NA	NA	NA	NA
1372	FBgn0011957_tRNA:Arg-ACG-1-2	NA	NA	NA	NA	NA	NA	1	NA	NA	NA	NA	NA	NA	NA	NA	NA	NA	NA	NA	NA	NA	NA
1373	FBgn0011958_tRNA:Arg-ACG-1-1	NA	NA	NA	NA	NA	NA	1	NA	NA	NA	NA	NA	NA	NA	NA	NA	NA	NA	NA	NA	NA	NA
1374	FBgn0011959_tRNA:Arg-ACG-1-10	NA	NA	NA	NA	NA	NA	1	NA	NA	NA	NA	NA	NA	NA	NA	NA	NA	NA	NA	NA	NA	NA
1375	FBgn0011960_tRNA:Arg-ACG-1-9	NA	NA	NA	NA	NA	NA	1	NA	NA	NA	NA	NA	NA	NA	NA	NA	NA	NA	NA	NA	NA	NA
1376	FBgn0011961_tRNA:Arg-ACG-1-8	NA	NA	NA	NA	NA	NA	1	NA	NA	NA	NA	NA	NA	NA	NA	NA	NA	NA	NA	NA	NA	NA
1377	FBgn0011962_tRNA:Arg-ACG-1-7	NA	NA	NA	NA	NA	NA	1	NA	NA	NA	NA	NA	NA	NA	NA	NA	NA	NA	NA	NA	NA	NA
1378	FBgn0011963_tRNA:Arg-ACG-1-6	NA	NA	NA	NA	NA	NA	1	NA	NA	NA	NA	NA	NA	NA	NA	NA	NA	NA	NA	NA	NA	NA
1379	FBgn0011965_tRNA:Arg-TCG-4-1	NA	NA	NA	NA	NA	NA	1	NA	NA	NA	NA	NA	NA	NA	NA	NA	NA	NA	NA	NA	NA	NA
1380	FBgn0011966_tRNA:Arg-TCG-2-3	NA	NA	NA	NA	NA	NA	1	NA	NA	NA	NA	NA	NA	NA	NA	NA	NA	NA	NA	NA	NA	NA
1381	FBgn0011970_tRNA:Ser-GCT-2-1	NA	NA	NA	NA	NA	NA	1	NA	NA	NA	NA	NA	NA	NA	NA	NA	NA	NA	NA	NA	NA	NA
1382	FBgn0011971_tRNA:Ser-GCT-2-2	NA	NA	NA	NA	NA	NA	1	NA	NA	NA	NA	NA	NA	NA	NA	NA	NA	NA	NA	NA	NA	NA
1383	FBgn0011974_tRNA:Ser-AGA-1-1	NA	NA	NA	NA	NA	NA	1	NA	NA	NA	NA	NA	NA	NA	NA	NA	NA	NA	NA	NA	NA	NA
1384	FBgn0011975_tRNA:Ser-CGA-1-1	NA	NA	NA	NA	NA	NA	1	NA	NA	NA	NA	NA	NA	NA	NA	NA	NA	NA	NA	NA	NA	NA
1385	FBgn0011976_tRNA:Ser-CGA-1-2	NA	NA	NA	NA	NA	NA	1	NA	NA	NA	NA	NA	NA	NA	NA	NA	NA	NA	NA	NA	NA	NA
1386	FBgn0011977_tRNA:Ser-CGA-1-3	NA	NA	NA	NA	NA	NA	1	NA	NA	NA	NA	NA	NA	NA	NA	NA	NA	NA	NA	NA	NA	NA
1387	FBgn0011980_tRNA:Ser-AGA-3-1	NA	NA	NA	NA	NA	NA	1	NA	NA	NA	NA	NA	NA	NA	NA	NA	NA	NA	NA	NA	NA	NA
1388	FBgn0011981_tRNA:Ser-AGA-3-2	NA	NA	NA	NA	NA	NA	1	NA	NA	NA	NA	NA	NA	NA	NA	NA	NA	NA	NA	NA	NA	NA
1389	FBgn0011982_tRNA:Ser-AGA-2-1	NA	NA	NA	NA	NA	NA	1	NA	NA	NA	NA	NA	NA	NA	NA	NA	NA	NA	NA	NA	NA	NA
1390	FBgn0011983_tRNA:Ser-AGA-2-2	NA	NA	NA	NA	NA	NA	1	NA	NA	NA	NA	NA	NA	NA	NA	NA	NA	NA	NA	NA	NA	NA
1391	FBgn0011984_tRNA:Ser-AGA-2-4	NA	NA	NA	NA	NA	NA	1	NA	NA	NA	NA	NA	NA	NA	NA	NA	NA	NA	NA	NA	NA	NA
1392	FBgn0011985_tRNA:Ser-AGA-2-3	NA	NA	NA	NA	NA	NA	1	NA	NA	NA	NA	NA	NA	NA	NA	NA	NA	NA	NA	NA	NA	NA
1393	FBgn0011986_tRNA:Ser-AGA-2-5	NA	NA	NA	NA	NA	NA	1	NA	NA	NA	NA	NA	NA	NA	NA	NA	NA	NA	NA	NA	NA	NA
1394	FBgn0011987_tRNA:SeC-TCA-1-1	NA	NA	NA	NA	NA	NA	1	NA	NA	NA	NA	NA	NA	NA	NA	NA	NA	NA	NA	NA	NA	NA
1395	FBgn0011993_tRNA:Thr-AGT-1-5	0.908803	0.309819	0.864323	0.438753	1	0.0114214	0.0666011	0.908803	0.0958395	0.630537	0.309819	1.24217	0.864323	0.627725	0.438753	1.40889	1	0	4.7e-17	0.0114214	2.52953	6.28933
1396	FBgn0011994_tRNA:Thr-AGT-1-6	0.908803	0.309819	0.864323	0.438753	1	0.0114214	0.0666011	0.908803	0.0958395	0.630537	0.309819	1.24217	0.864323	0.627725	0.438753	1.40889	1	0	4.7e-17	0.0114214	2.52953	6.28933
1397	FBgn0011998_tRNA:Val-CAC-2-2	NA	NA	NA	NA	NA	NA	1	NA	NA	NA	NA	NA	NA	NA	NA	NA	NA	NA	NA	NA	NA	NA
1398	FBgn0011999_tRNA:Val-CAC-2-1	NA	NA	NA	NA	NA	NA	1	NA	NA	NA	NA	NA	NA	NA	NA	NA	NA	NA	NA	NA	NA	NA
1399	FBgn0012000_tRNA:Val-CAC-2-3	NA	NA	NA	NA	NA	NA	1	NA	NA	NA	NA	NA	NA	NA	NA	NA	NA	NA	NA	NA	NA	NA
1400	FBgn0012001_tRNA:Val-CAC-2-4	NA	NA	NA	NA	NA	NA	1	NA	NA	NA	NA	NA	NA	NA	NA	NA	NA	NA	NA	NA	NA	NA
1401	FBgn0012002_tRNA:Val-CAC-1-1	NA	NA	NA	NA	NA	NA	1	NA	NA	NA	NA	NA	NA	NA	NA	NA	NA	NA	NA	NA	NA	NA
1402	FBgn0012003_tRNA:Val-CAC-2-5	NA	NA	NA	NA	NA	NA	1	NA	NA	NA	NA	NA	NA	NA	NA	NA	NA	NA	NA	NA	NA	NA
1403	FBgn0012004_tRNA:Val-CAC-2-6	NA	NA	NA	NA	NA	NA	1	NA	NA	NA	NA	NA	NA	NA	NA	NA	NA	NA	NA	NA	NA	NA
1404	FBgn0012009_tRNA:Val-AAC-2-4	NA	NA	NA	NA	NA	NA	1	NA	NA	NA	NA	NA	NA	NA	NA	NA	NA	NA	NA	NA	NA	NA
1405	FBgn0012010_tRNA:Val-AAC-2-3	NA	NA	NA	NA	NA	NA	1	NA	NA	NA	NA	NA	NA	NA	NA	NA	NA	NA	NA	NA	NA	NA
1406	FBgn0012011_tRNA:Val-AAC-1-1	NA	NA	NA	NA	NA	NA	1	NA	NA	NA	NA	NA	NA	NA	NA	NA	NA	NA	NA	NA	NA	NA
1407	FBgn0012016_tRNA:Tyr-GTA-1-3	NA	NA	NA	NA	NA	NA	1	NA	NA	NA	NA	NA	NA	NA	NA	NA	NA	NA	NA	NA	NA	NA
1408	FBgn0012017_tRNA:Tyr-GTA-1-2	NA	NA	NA	NA	NA	NA	1	NA	NA	NA	NA	NA	NA	NA	NA	NA	NA	NA	NA	NA	NA	NA
1409	FBgn0012018_tRNA:Tyr-GTA-3-1	NA	NA	NA	NA	NA	NA	1	NA	NA	NA	NA	NA	NA	NA	NA	NA	NA	NA	NA	NA	NA	NA
1410	FBgn0012024_tRNA:Tyr-GTA-1-8	NA	NA	NA	NA	NA	NA	1	NA	NA	NA	NA	NA	NA	NA	NA	NA	NA	NA	NA	NA	NA	NA
1411	FBgn0012025_tRNA:Tyr-GTA-1-7	NA	NA	NA	NA	NA	NA	1	NA	NA	NA	NA	NA	NA	NA	NA	NA	NA	NA	NA	NA	NA	NA
1412	FBgn0012026_tRNA:Tyr-GTA-1-6	NA	NA	NA	NA	NA	NA	1	NA	NA	NA	NA	NA	NA	NA	NA	NA	NA	NA	NA	NA	NA	NA
1413	FBgn0012027_tRNA:Tyr-GTA-1-5	NA	NA	NA	NA	NA	NA	1	NA	NA	NA	NA	NA	NA	NA	NA	NA	NA	NA	NA	NA	NA	NA
1414	FBgn0012028_tRNA:Tyr-GTA-1-4	NA	NA	NA	NA	NA	NA	1	NA	NA	NA	NA	NA	NA	NA	NA	NA	NA	NA	NA	NA	NA	NA
1415	FBgn0012034_AcCoAS	0.0319451	0.00156786	0.97151	0.00568426	0.0665201	0.00331527	0.00937037	0.0319451	3.73487	0.181022	0.00156786	3.76964	0.97151	0.443552	0.00568426	3.52253	0.0665201	2.88848	0.173125	0.00331527	2.93688	1.9625
1416	FBgn0012036_Aldh	0.295151	0.0328891	0.971856	0.0546909	0.33404	0.0276716	0.154959	0.295151	1.25556	0.167339	0.0328891	2.24224	0.971856	0.44252	0.0546909	2.36599	0.33404	1.12494	0.194264	0.0276716	2.20191	1.52337
1417	FBgn0012037_Ance	0.568268	0.0402241	0.983203	0.0543509	0.411445	0.0518359	0.218338	0.568268	0.572655	0.115281	0.0402241	2.15134	0.983203	0.402506	0.0543509	2.36895	0.411445	0.906676	0.127136	0.0518359	1.94449	1.62437
1418	FBgn0012042_AttA	0.526723	1	1.53e-10	1.57e-10	0.699316	0.0737446	9.19e-10	0.526723	0.650734	1.06523	1	0.0596299	1.53e-10	24.5441	1.57e-10	27.1969	0.699316	0.360644	0.224134	0.0737446	1.78819	3.46486
1419	FBgn0012051_CalpA	0.243578	0.18125	0.827103	0.33977	0.207244	0.221323	0.698763	0.243578	1.45974	0.0663533	0.18125	1.48604	0.827103	0.67142	0.33977	1.52678	0.207244	1.6329	0.06704	0.221323	1.22302	1.24819
1420	FBgn0012058_Cdc27	0.914742	0.140212	0.954212	0.179701	0.912843	0.126368	0.555398	0.914742	0.0892977	0.0455501	0.140212	1.59958	0.954212	0.487358	0.179701	1.8164	0.912843	0.0913853	0.0440916	0.126368	1.52858	1.30514
1421	FBgn0012344_Dh44	0.624544	0.832377	0.299904	0.462552	0.632328	0.690734	0.882255	0.624544	0.475925	0.0535748	0.832377	0.665465	0.299904	1.25741	0.462552	1.38427	0.632328	0.463267	0.0482899	0.690734	-0.39786	0.912238
1422	FBgn0013263_Trl	0.296768	0.519503	0.531976	0.987248	0.304666	0.649396	0.879054	0.296768	1.24978	0.0745942	0.519503	0.983285	0.531976	0.970214	0.987248	1.00708	0.304666	1.22201	0.0845813	0.649396	-0.454602	0.926338
1423	FBgn0013269_FK506-bp1	0.549943	0.177086	0.904164	0.267513	0.659213	0.204558	0.689454	0.549943	0.606333	0.0861667	0.177086	1.49637	0.904164	0.574666	0.267513	1.63581	0.659213	0.420773	0.0756517	0.204558	1.26867	1.26424
1424	FBgn0013272_Gp150	0.405244	0.871244	0.188112	0.309658	0.27311	0.391762	0.713598	0.405244	0.922508	0.0481132	0.871244	0.619081	0.188112	1.4695	0.309658	1.56919	0.27311	1.33785	0.048108	0.391762	-0.856427	0.790984
1425	FBgn0013275_Hsp70Aa	0.374913	0.986933	0.019768	0.0297773	1	0.213495	0.112899	0.374913	1.00379	1.58969	0.986933	0.38526	0.019768	2.47629	0.0297773	2.65921	1	0	4.18e-17	0.213495	-1.24401	0.478785
1426	FBgn0013276_Hsp70Ab	0.886556	0.0546165	0.985942	0.0650596	0.97928	0.0535631	0.281296	0.886556	0.120749	0.092028	0.0546165	2.01472	0.985942	0.39015	0.0650596	2.28409	0.97928	0.0209477	0.0402254	0.0535631	1.93035	1.59633
1427	FBgn0013277_Hsp70Ba	0.509992	0.450165	0.68437	0.763089	0.454487	0.284263	0.865563	0.509992	0.684015	0.458721	0.450165	1.05929	0.68437	0.818101	0.763089	1.14245	0.454487	0.803225	0.439779	0.284263	1.07079	1.56207
1428	FBgn0013278_Hsp70Bb	0.353929	0.00988636	0.992862	0.0148522	0.359868	0.00590505	0.0349114	0.353929	1.06416	0.13362	0.00988636	2.80662	0.992862	0.348483	0.0148522	3.00913	0.359868	1.0467	0.129221	0.00590505	2.75301	1.76375
1429	FBgn0013279_Hsp70Bc	0.824668	0.190382	0.924593	0.259599	0.987219	0.291456	0.718369	0.824668	0.193641	0.155094	0.190382	1.46415	0.924593	0.543137	0.259599	1.64946	0.987219	0.0128671	0.0317129	0.291456	1.05493	1.40209
1430	FBgn0013300_ProtA	NA	NA	NA	NA	NA	NA	1	NA	NA	NA	NA	NA	NA	NA	NA	NA	NA	NA	NA	NA	NA	NA
1431	FBgn0013301_ProtB	0.27664	0.211052	0.813572	0.385687	1	0.00371633	0.0220918	0.27664	1.32422	2.94901	0.211052	1.41803	0.813572	0.686411	0.385687	1.46856	1	0	8.98e-17	0.00371633	2.90129	17.5693
1432	FBgn0013303_Nca	0.841282	0.0206456	0.995444	0.0234996	0.970642	0.0181467	0.104059	0.841282	0.173524	0.0617727	0.0206456	2.45606	0.995444	0.324757	0.0234996	2.77645	0.970642	0.0298181	0.0237849	0.0181467	2.36261	1.72507
1433	FBgn0013305_Nmda1	0.688468	0.00230635	0.999476	0.00257175	0.528786	0.0311202	0.0137586	0.688468	0.376546	0.0326216	0.00230635	3.55612	0.999476	0.239194	0.00257175	3.97698	0.528786	0.646707	0.032343	0.0311202	2.15553	1.80415
1434	FBgn0013307_Odc1	0.426895	0.00428265	0.997606	0.00585342	0.53785	0.001862	0.0111201	0.426895	0.868292	0.14055	0.00428265	3.22724	0.997606	0.294968	0.00585342	3.50628	0.53785	0.629207	0.140743	0.001862	3.1114	1.82848
1435	FBgn0013308_Odc2	0.575302	0.0319716	0.987206	0.0424931	0.609678	0.206979	0.177135	0.575302	0.56003	0.172571	0.0319716	2.25508	0.987206	0.38387	0.0424931	2.48642	0.609678	0.500563	0.116465	0.206979	1.26192	1.64687
1436	FBgn0013323_Ptth	0.490816	0.084566	0.954882	0.125044	0.879049	0.488265	0.411479	0.490816	0.723596	0.276835	0.084566	1.82169	0.954882	0.485876	0.125044	1.98158	0.879049	0.129302	0.101218	0.488265	0.693071	1.10254
1437	FBgn0013325_RpL11	0.657678	0.118853	0.949116	0.16508	0.835002	0.225646	0.531951	0.657678	0.42315	0.128256	0.118853	1.67225	0.949116	0.498215	0.16508	1.85496	0.835002	0.18108	0.114298	0.225646	1.21165	1.41386
1438	FBgn0013334_Sap47	0.932496	0.0354436	0.992369	0.0402599	0.898089	0.0711762	0.194685	0.932496	0.0700041	0.0348382	0.0354436	2.20837	0.992369	0.352254	0.0402599	2.51241	0.898089	0.107755	0.0396551	0.0711762	1.80435	1.57865
1439	FBgn0013342_nSyb	0.523278	0.00396096	0.99843	0.00499866	0.493378	0.0209168	0.0235316	0.523278	0.657496	0.0565337	0.00396096	3.26786	0.99843	0.277651	0.00499866	3.5942	0.493378	0.718216	0.0523184	0.0209168	2.30948	1.96387
1440	FBgn0013343_Syx1A	0.165595	0.0376949	0.945045	0.0759149	0.0260672	0.133061	0.146558	0.165595	1.87555	0.107478	0.0376949	2.18057	0.945045	0.506429	0.0759149	2.21189	0.0260672	3.97467	0.120938	0.133061	1.50214	1.49924
1441	FBgn0013347_TfIIA-S	0.609243	0.171279	0.915149	0.250909	0.689387	0.166188	0.663947	0.609243	0.501293	0.122414	0.171279	1.51117	0.915149	0.558206	0.250909	1.66492	0.689387	0.375189	0.100728	0.166188	1.38456	1.21464
1442	FBgn0013348_TpnC41C	0.526625	0.168392	0.906596	0.256295	0.565518	0.154296	0.634143	0.526625	0.650925	0.146435	0.168392	1.51871	0.906596	0.571108	0.256295	1.65527	0.565518	0.577637	0.136429	0.154296	1.42452	1.20369
1443	FBgn0013432_bcn92	0.486183	0.656213	0.473132	0.814704	0.594935	0.820299	0.97861	0.486183	0.733401	0.101137	0.656213	0.845702	0.473132	1.0334	0.814704	1.10908	0.594935	0.525625	0.0961893	0.820299	-0.227161	0.962574
1444	FBgn0013433_beat-Ia	0.642007	0.0705587	0.972065	0.0949081	0.466773	0.24637	0.355338	0.642007	0.447755	0.0569684	0.0705587	1.9014	0.972065	0.441893	0.0949081	2.1083	0.466773	0.775573	0.0750934	0.24637	1.15921	1.49106
1445	FBgn0013435_Cdc2rk	0.690953	0.316923	0.831328	0.480559	0.633408	0.730834	0.898418	0.690953	0.37288	0.071432	0.316923	1.2315	0.831328	0.666655	0.480559	1.36639	0.633408	0.461524	0.0806161	0.730834	0.344016	1.0763
1446	FBgn0013467_igl	0.933181	0.35639	0.83725	0.512696	0.950531	0.45267	0.928922	0.933181	0.0692675	0.039425	0.35639	1.17552	0.83725	0.659903	0.512696	1.33593	0.950531	0.0507948	0.0272295	0.45267	0.750971	1.078
1447	FBgn0013469_klu	0.210484	0.00033176	0.999111	0.000570198	0.220626	0.000893512	0.00198891	0.210484	1.61621	0.147484	0.00033176	4.70242	0.999111	0.25666	0.000570198	4.92853	0.220626	1.56567	0.156711	0.000893512	3.32207	2.22779
1448	FBgn0013531_MED20	0.580137	0.12589	0.938878	0.182177	0.630754	0.13378	0.553937	0.580137	0.551444	0.104796	0.12589	1.64698	0.938878	0.518216	0.182177	1.81019	0.630754	0.465813	0.093832	0.13378	1.49936	1.17192
1449	FBgn0013548_l(2)dtl	0.666779	0.0502834	0.982031	0.0653365	0.719437	0.178737	0.266223	0.666779	0.409141	0.139758	0.0502834	2.05149	0.982031	0.407367	0.0653365	2.2821	0.719437	0.331821	0.121957	0.178737	1.34465	1.43625
1450	FBgn0013563_Pex1	0.591691	0.682748	0.477142	0.792126	0.408602	0.721623	0.957216	0.591691	0.531227	0.0505108	0.682748	0.819692	0.477142	1.02896	0.792126	1.12348	0.408602	0.913903	0.0625434	0.721623	-0.35629	0.931895
1451	FBgn0013576_mtd	0.93317	0.177715	0.938296	0.232432	0.985573	0.161266	0.651866	0.93317	0.0692791	0.0213346	0.177715	1.4948	0.938296	0.519292	0.232432	1.69964	0.985573	0.0145372	0.00887318	0.161266	1.40083	1.19076
1452	FBgn0013672_mt:ATPase6	0.57872	0.0061297	0.997912	0.00756	0.793244	0.134975	0.0362192	0.57872	0.553952	0.347942	0.0061297	3.04378	0.997912	0.289186	0.00756	3.36611	0.793244	0.232876	0.167439	0.134975	1.49477	1.86502
1453	FBgn0013673_mt:ATPase8	0.218267	0.749143	0.24899	0.485206	0.729087	0.546737	0.771781	0.218267	1.57721	1.03221	0.749143	0.753818	0.24899	1.34325	0.485206	1.36187	0.729087	0.318296	0.185074	0.546737	0.602658	1.19178
1454	FBgn0013674_mt:CoI	0.919154	0.363376	0.830924	0.526246	0.762957	0.362807	0.933069	0.919154	0.0844671	0.101243	0.363376	1.16613	0.830924	0.667113	0.526246	1.3236	0.762957	0.272263	0.111639	0.362807	0.910029	1.16191
1455	FBgn0013675_mt:CoII	0.849785	0.369554	0.817764	0.546301	0.637447	0.502431	0.937211	0.849785	0.163389	0.153042	0.369554	1.15795	0.817764	0.681807	0.546301	1.30584	0.637447	0.455033	0.1524	0.502431	0.670669	1.14522
1456	FBgn0013676_mt:CoIII	0.955764	0.548469	0.692567	0.8536	0.830277	0.650048	0.991525	0.955764	0.0452919	0.0816396	0.548469	0.953151	0.692567	0.810051	0.8536	1.08492	0.830277	0.186802	0.100846	0.650048	0.453695	1.0392
1457	FBgn0013678_mt:Cyt-b	0.816273	0.239757	0.896687	0.336812	0.755501	0.505182	0.80693	0.816273	0.203968	0.200041	0.239757	1.36044	0.896687	0.585326	0.336812	1.53078	0.755501	0.282211	0.139257	0.505182	0.666359	1.22972
1458	FBgn0013679_mt:ND1	0.571505	0.120689	0.941064	0.174833	0.639807	0.493589	0.537772	0.571505	0.566824	0.337397	0.120689	1.66552	0.941064	0.514119	0.174833	1.82887	0.639807	0.451259	0.172734	0.493589	0.684612	1.33648
1459	FBgn0013680_mt:ND2	0.250442	0.0428664	0.957476	0.0758367	0.605357	0.270536	0.231161	0.250442	1.43008	0.633525	0.0428664	2.12279	0.957476	0.480011	0.0758367	2.21237	0.605357	0.507842	0.243813	0.270536	1.10183	1.42708
1460	FBgn0013681_mt:ND3	0.501749	0.112548	0.938971	0.168464	0.746879	0.388707	0.511496	0.501749	0.700835	0.415365	0.112548	1.69618	0.938971	0.518042	0.168464	1.84573	0.746879	0.293842	0.18798	0.388707	0.861965	1.46543
1461	FBgn0013683_mt:ND4L	0.254647	0.725578	0.294935	0.558655	0.879183	0.964686	0.828536	0.254647	1.41233	0.903097	0.725578	0.777435	0.294935	1.26521	0.558655	1.29519	0.879183	0.129149	0.0922121	0.964686	-0.0442739	0.967801
1462	FBgn0013684_mt:ND5	0.575119	0.00202274	0.999344	0.00241005	0.808579	0.088701	0.0120753	0.575119	0.560356	0.343179	0.00202274	3.62796	0.999344	0.246389	0.00241005	4.01552	0.808579	0.21353	0.174836	0.088701	1.70229	2.15201
1463	FBgn0013685_mt:ND6	0.185199	0.481359	0.493275	0.98759	0.862326	0.799489	0.707377	0.185199	1.75422	0.947919	0.481359	1.02431	0.493275	1.01131	0.98759	1.00689	0.862326	0.148633	0.111715	0.799489	0.254009	1.07922
1464	FBgn0013686_mt:lrRNA	0.967464	0.626747	0.620547	0.993698	0.827492	0.878517	0.997015	0.967464	0.0331023	0.0816538	0.626747	0.874643	0.620547	0.880757	0.993698	1.00349	0.827492	0.190192	0.0807679	0.878517	0.152849	1.02135
1465	FBgn0013687_mt:ori	NA	NA	NA	NA	NA	NA	1	NA	NA	NA	NA	NA	NA	NA	NA	NA	NA	NA	NA	NA	NA	NA
1466	FBgn0013688_mt:srRNA	0.49043	0.0014375	0.999364	0.00180622	0.572211	0.0750114	0.00859406	0.49043	0.724409	0.420153	0.0014375	3.81861	0.999364	0.245386	0.00180622	4.18928	0.572211	0.565559	0.264833	0.0750114	1.78039	1.92308
1467	FBgn0013689_mt:tRNA:Ala-TGC	0.423148	0.44338	0.662166	0.778214	0.454631	0.738473	0.963154	0.423148	0.877467	0.718329	0.44338	1.0671	0.662166	0.839867	0.778214	1.13251	0.454631	0.802897	0.347731	0.738473	0.333877	1.11142
1468	FBgn0013690_mt:tRNA:Cys-GCA	0.341752	0.958864	0.0560356	0.0906952	1	0.0518303	0.273365	0.341752	1.10093	2.51423	0.958864	0.476784	0.0560356	2.00333	0.0906952	2.12928	1	0	1.13e-16	0.0518303	-1.94454	0.588779
1469	FBgn0013691_mt:tRNA:Asp-GTC	NA	NA	NA	NA	NA	NA	1	NA	NA	NA	NA	NA	NA	NA	NA	NA	NA	NA	NA	NA	NA	NA
1470	FBgn0013692_mt:tRNA:Glu-TTC	NA	NA	NA	NA	NA	NA	1	NA	NA	NA	NA	NA	NA	NA	NA	NA	NA	NA	NA	NA	NA	NA
1471	FBgn0013693_mt:tRNA:Phe-GAA	NA	NA	NA	NA	NA	NA	1	NA	NA	NA	NA	NA	NA	NA	NA	NA	NA	NA	NA	NA	NA	NA
1472	FBgn0013694_mt:tRNA:Gly-TCC	0.759757	0.99342	0.0247622	0.0295093	1	0.599392	0.139674	0.759757	0.27652	0.594664	0.99342	0.343975	0.0247622	2.37192	0.0295093	2.66365	1	0	3.89e-16	0.599392	0.525276	1.92751
1473	FBgn0013695_mt:tRNA:His-GTG	NA	NA	NA	NA	NA	NA	1	NA	NA	NA	NA	NA	NA	NA	NA	NA	NA	NA	NA	NA	NA	NA
1474	FBgn0013696_mt:tRNA:Ile-GAT	NA	NA	NA	NA	NA	NA	1	NA	NA	NA	NA	NA	NA	NA	NA	NA	NA	NA	NA	NA	NA	NA
1475	FBgn0013697_mt:tRNA:Lys-CTT	0.626029	0.356094	0.790982	0.560743	0.830777	0.598224	0.928725	0.626029	0.473497	0.38161	0.356094	1.17593	0.790982	0.710677	0.560743	1.29341	0.830777	0.186196	0.17366	0.598224	0.526957	1.17817
1476	FBgn0013698_mt:tRNA:Leu-TAG	0.850117	0.557429	0.666246	0.889672	1	0.704573	0.992486	0.850117	0.162996	0.382725	0.557429	0.943975	0.666246	0.83587	0.889672	1.06319	1	0	2.98e-16	0.704573	-0.379155	0.842
1477	FBgn0013699_mt:tRNA:Leu-TAA	NA	NA	NA	NA	NA	NA	1	NA	NA	NA	NA	NA	NA	NA	NA	NA	NA	NA	NA	NA	NA	NA
1478	FBgn0013700_mt:tRNA:Met-CAT	NA	NA	NA	NA	NA	NA	1	NA	NA	NA	NA	NA	NA	NA	NA	NA	NA	NA	NA	NA	NA	NA
1479	FBgn0013701_mt:tRNA:Asn-GTT	NA	NA	NA	NA	NA	NA	1	NA	NA	NA	NA	NA	NA	NA	NA	NA	NA	NA	NA	NA	NA	NA
1480	FBgn0013702_mt:tRNA:Pro-TGG	NA	NA	NA	NA	NA	NA	1	NA	NA	NA	NA	NA	NA	NA	NA	NA	NA	NA	NA	NA	NA	NA
1481	FBgn0013703_mt:tRNA:Gln-TTG	NA	NA	NA	NA	NA	NA	1	NA	NA	NA	NA	NA	NA	NA	NA	NA	NA	NA	NA	NA	NA	NA
1482	FBgn0013704_mt:tRNA:Arg-TCG	0.268566	0.933393	0.0733105	0.129184	1	0.973849	0.366706	0.268566	1.35568	0.990584	0.933393	0.528136	0.0733105	1.88454	0.129184	1.96669	1	0	4.71e-16	0.973849	0.0327817	1.00385
1483	FBgn0013705_mt:tRNA:Ser-GCT	NA	NA	NA	NA	NA	NA	1	NA	NA	NA	NA	NA	NA	NA	NA	NA	NA	NA	NA	NA	NA	NA
1484	FBgn0013706_mt:tRNA:Ser-TGA	NA	NA	NA	NA	NA	NA	1	NA	NA	NA	NA	NA	NA	NA	NA	NA	NA	NA	NA	NA	NA	NA
1485	FBgn0013707_mt:tRNA:Thr-TGT	NA	NA	NA	NA	NA	NA	1	NA	NA	NA	NA	NA	NA	NA	NA	NA	NA	NA	NA	NA	NA	NA
1486	FBgn0013708_mt:tRNA:Val-TAC	0.725226	0.507238	0.686948	0.818163	0.906166	0.726364	0.985684	0.725226	0.323684	0.310802	0.507238	0.996292	0.686948	0.81557	0.818163	1.1069	0.906166	0.0987585	0.251557	0.726364	0.349966	1.03298
1487	FBgn0013709_mt:tRNA:Trp-TCA	0.280262	0.999975	6.39e-06	9.32e-06	1	0.00216998	3.83e-05	0.280262	1.31041	2.39532	0.999975	0.165353	6.39e-06	7.7464	9.32e-06	8.28699	1	0	5.78e-16	0.00216998	3.06593	6801610000000000
1488	FBgn0013710_mt:tRNA:Tyr-GTA	NA	NA	NA	NA	NA	NA	1	NA	NA	NA	NA	NA	NA	NA	NA	NA	NA	NA	NA	NA	NA	NA
1489	FBgn0013717_not	0.912567	0.181493	0.935232	0.23942	0.918239	0.102199	0.476304	0.912567	0.091689	0.04647	0.181493	1.48545	0.935232	0.524863	0.23942	1.6862	0.918239	0.0854667	0.0573075	0.102199	1.63428	1.22071
1490	FBgn0013718_nuf	0.981487	0.114475	0.96744	0.140785	0.9807	0.159978	0.517826	0.981487	0.0186949	0.0207358	0.114475	1.68873	0.96744	0.455128	0.140785	1.92743	0.9807	0.0194972	0.0292384	0.159978	1.40515	1.3649
1491	FBgn0013720_pck	0.596674	0.00129723	0.999617	0.00150368	0.857566	0.00355552	0.00775817	0.596674	0.522636	0.0620781	0.00129723	3.87698	0.999617	0.229611	0.00150368	4.30195	0.857566	0.154207	0.0331896	0.00355552	2.91512	2.57868
1492	FBgn0013725_phyl	0.515838	0.264165	0.837912	0.420814	0.551614	0.654679	0.841261	0.515838	0.672257	0.0792724	0.264165	1.31618	0.837912	0.659142	0.420814	1.42827	0.551614	0.603213	0.0659429	0.654679	0.447271	1.19332
1493	FBgn0013726_pnut	0.832154	0.0360699	0.990879	0.0426283	0.677933	0.060189	0.197817	0.832154	0.184525	0.0322502	0.0360699	2.20045	0.990879	0.36266	0.0426283	2.48489	0.677933	0.392241	0.04865	0.060189	1.87941	1.54272
1494	FBgn0013732_sced	0.0940379	0.0656783	0.868444	0.157954	0.0429252	0.218567	0.231445	0.0940379	2.49893	0.115029	0.0656783	1.93304	0.868444	0.622601	0.157954	1.87502	0.0429252	3.39048	0.136633	0.218567	1.23035	1.19862
1495	FBgn0013733_shot	0.691949	0.468284	0.713825	0.751682	0.566401	0.730119	0.977402	0.691949	0.371414	0.0646506	0.468284	1.03879	0.713825	0.789094	0.751682	1.15005	0.566401	0.576035	0.0885252	0.730119	0.344967	1.01642
1496	FBgn0013746_alien	0.409884	0.361656	0.730708	0.62596	0.38182	0.400154	0.932341	0.409884	0.910638	0.0654843	0.361656	1.16843	0.730708	0.772323	0.62596	1.24046	0.38182	0.984689	0.0686773	0.400154	0.841346	1.14316
1497	FBgn0013749_Arf102F	0.526819	0.0431698	0.980153	0.0600351	0.732965	0.0599299	0.232622	0.526819	0.650546	0.102444	0.0431698	2.11963	0.980153	0.414722	0.0600351	2.32192	0.732965	0.312913	0.0716103	0.0599299	1.88131	1.41611
1498	FBgn0013750_Arf51F	0.941048	0.581498	0.65998	0.92028	0.987194	0.767004	0.994627	0.941048	0.0608469	0.0177247	0.581498	0.91961	0.65998	0.84201	0.92028	1.0452	0.987194	0.0128929	0.00678326	0.767004	0.296296	1.02507
1499	FBgn0013751_Awh	0.572202	0.0362341	0.985184	0.0485689	0.684792	0.0359963	0.19745	0.572202	0.565574	0.101125	0.0362341	2.1984	0.985184	0.393727	0.0485689	2.42243	0.684792	0.381994	0.0790724	0.0359963	2.09697	1.55515
1500	FBgn0013753_Bgb	0.594053	0.00210117	0.99936	0.00247478	0.765251	0.0100157	0.012541	0.594053	0.527145	0.0662729	0.00210117	3.60706	0.99936	0.24558	0.00247478	3.99977	0.765251	0.269224	0.0514525	0.0100157	2.57529	2.12347
1501	FBgn0013755_Bro	NA	NA	NA	NA	NA	NA	1	NA	NA	NA	NA	NA	NA	NA	NA	NA	NA	NA	NA	NA	NA	NA
1502	FBgn0013756_Mtor	0.260915	0.867791	0.144435	0.263464	0.175827	0.180295	0.60779	0.260915	1.38643	0.081706	0.867791	0.623419	0.144435	1.58651	0.263464	1.64274	0.175827	1.81045	0.0931924	0.180295	-1.33985	0.792301
1503	FBgn0013759_CASK	0.295272	0.0498106	0.957954	0.0840356	0.350367	0.0269076	0.150967	0.295272	1.25513	0.0976591	0.0498106	2.05569	0.957954	0.478907	0.0840356	2.16462	0.350367	1.07477	0.093429	0.0269076	2.21286	1.50505
1504	FBgn0013762_Cdk5	0.0320586	0.402784	0.307389	0.885868	0.00332748	0.549752	0.0197995	0.0320586	3.73071	0.163977	0.402784	1.11558	0.307389	1.24587	0.885868	1.06545	0.00332748	6.53425	0.181488	0.549752	-0.598132	0.853962
1505	FBgn0013763_Idgf6	0.899879	0.206756	0.921819	0.27803	0.786866	0.359066	0.750862	0.899879	0.105754	0.0484905	0.206756	1.42726	0.921819	0.547663	0.27803	1.61827	0.786866	0.241038	0.0564653	0.359066	0.917146	1.18473
1506	FBgn0013764_Chi	0.573753	0.0195386	0.992562	0.0253652	0.780242	0.0373776	0.111652	0.573753	0.562797	0.184163	0.0195386	2.48174	0.992562	0.350796	0.0253652	2.73842	0.780242	0.249588	0.131726	0.0373776	2.08162	1.71061
1507	FBgn0013765_cnn	0.319666	0.0215109	0.982856	0.0343331	0.37166	0.0361876	0.12232	0.319666	1.17127	0.0763471	0.0215109	2.43699	0.982856	0.403969	0.0343331	2.58957	0.37166	1.01291	0.0655281	0.0361876	2.09481	1.61638
1508	FBgn0013767_Crz	0.382803	0.550236	0.543237	0.992891	0.5593	0.97848	0.944723	0.382803	0.982001	0.137126	0.550236	0.951337	0.543237	0.958538	0.992891	1.00394	0.5593	0.588993	0.101797	0.97848	-0.0269741	0.998844
1509	FBgn0013770_Cp1	0.300902	0.00604647	0.99437	0.00950986	0.342951	0.00442562	0.0262617	0.300902	1.23515	0.136944	0.00604647	3.05068	0.99437	0.335601	0.00950986	3.24276	0.342951	1.09725	0.139479	0.00442562	2.84611	1.74187
1510	FBgn0013771_Cyp6a9	0.292285	0.188449	0.839552	0.3377	0.676613	0.307304	0.714311	0.292285	1.26589	0.0853584	0.188449	1.4687	0.839552	0.657253	0.3377	1.52958	0.676613	0.394226	0.0560468	0.307304	1.02089	1.33144
1511	FBgn0013772_Cyp6a8	0.629801	0.706401	0.460849	0.751761	0.537395	0.716287	0.975438	0.629801	0.467358	0.0961434	0.706401	0.79643	0.460849	1.04714	0.751761	1.15	0.537395	0.630078	0.111181	0.716287	-0.363425	0.893822
1512	FBgn0013773_Cyp6a22	0.43113	0.108056	0.933469	0.168596	0.245082	0.185117	0.496469	0.43113	0.858024	0.10644	0.108056	1.71406	0.933469	0.528001	0.168596	1.84537	0.245082	1.45317	0.157663	0.185117	1.32516	1.35704
1513	FBgn0013799_Deaf1	0.00450442	0.0681709	0.495103	0.37502	0.00582114	0.725095	0.026724	0.00450442	6.14213	0.107414	0.0681709	1.91659	0.495103	1.00933	0.37502	1.48148	0.00582114	5.81439	0.0999167	0.725095	0.351658	1.16666
1514	FBgn0013810_Dhc36C	0.277192	0.347889	0.687538	0.652522	0.244743	0.340628	0.814404	0.277192	1.3221	0.11956	0.347889	1.18715	0.687538	0.814991	0.652522	1.22021	0.244743	1.45464	0.12033	0.340628	0.952926	1.10794
1515	FBgn0013811_Dhc62B	0.891946	0.465129	0.752527	0.708558	0.859635	0.910205	0.976585	0.891946	0.114654	0.087341	0.465129	1.04233	0.752527	0.750394	0.708558	1.17961	0.859635	0.151781	0.101812	0.910205	0.112781	1.01572
1516	FBgn0013812_Dhc93AB	0.845913	0.365496	0.820073	0.539909	0.828905	0.414157	0.934746	0.845913	0.167992	0.0476711	0.365496	1.16331	0.820073	0.679256	0.539909	1.31144	0.828905	0.18847	0.0617264	0.414157	0.8166	1.08751
1517	FBgn0013813_Dhc98D	0.232445	0.490154	0.521315	0.967872	0.358242	0.987055	0.795516	0.232445	1.50975	0.129246	0.490154	1.01469	0.521315	0.981376	0.967872	1.01795	0.358242	1.05145	0.118061	0.987055	0.016225	1.01154
1518	FBgn0013949_Elal	0.88605	0.000813356	0.99991	0.00079321	0.814843	0.00501159	0.00474983	0.88605	0.121323	0.0677408	0.000813356	4.14879	0.99991	0.19179	0.00079321	4.70926	0.814843	0.205738	0.102416	0.00501159	2.80629	2.36517
1519	FBgn0013953_Esp	0.812407	0.00693649	0.998679	0.00757258	0.847057	0.0171204	0.0409038	0.812407	0.208761	0.0620206	0.00693649	2.98165	0.998679	0.271034	0.00757258	3.36521	0.847057	0.166629	0.0403297	0.0171204	2.38411	1.74408
1520	FBgn0013954_FK506-bp2	0.0434868	0.0333077	0.866022	0.102353	0.0685937	0.10124	0.183926	0.0434868	3.37544	0.158762	0.0333077	2.2365	0.866022	0.625621	0.102353	2.07348	0.0685937	2.85369	0.155399	0.10124	1.63887	1.40524
1521	FBgn0013972_Gycalpha99B	0.651358	0.03076	0.989548	0.0391184	0.671346	0.00601077	0.035527	0.651358	0.432998	0.131601	0.03076	2.27265	0.989548	0.370955	0.0391184	2.52629	0.671346	0.402186	0.138375	0.00601077	2.74719	1.67748
1522	FBgn0013973_Gycbeta100B	0.462393	0.0122612	0.993886	0.0168506	0.147262	0.36708	0.0713484	0.462393	0.785344	0.0429046	0.0122612	2.70238	0.993886	0.339995	0.0168506	2.94436	0.147262	2.00346	0.062832	0.36708	0.901956	1.535
1523	FBgn0013981_His4r	0.527083	0.183547	0.896673	0.281311	0.640423	0.254931	0.703798	0.527083	0.650029	0.0821656	0.183547	1.48044	0.896673	0.585346	0.281311	1.61293	0.640423	0.450277	0.0754926	0.254931	1.13846	1.34368
1524	FBgn0013983_imd	0.00934609	0.18426	0.37853	0.730362	0.0167913	0.628439	0.0547825	0.00934609	5.21946	0.157433	0.18426	1.47872	0.37853	1.14623	0.730362	1.1645	0.0167913	4.50116	0.154657	0.628439	0.483926	1.10353
1525	FBgn0013987_MAPk-Ak2	0.294295	0.0443887	0.962295	0.074655	0.374695	0.163566	0.238469	0.294295	1.25864	0.0537878	0.0443887	2.10716	0.962295	0.468498	0.074655	2.2197	0.374695	1.0044	0.0387648	0.163566	1.39318	1.49952
1526	FBgn0013995_Calx	0.459176	0.0910783	0.947867	0.138035	0.283704	0.235086	0.436156	0.459176	0.792582	0.0518895	0.0910783	1.7891	0.947867	0.500776	0.138035	1.93643	0.283704	1.29747	0.05775	0.235086	1.18736	1.46817
1527	FBgn0013997_Nrx-IV	0.264528	0.155891	0.858698	0.284221	0.257286	0.314135	0.638264	0.264528	1.37179	0.0706038	0.155891	1.55284	0.858698	0.634612	0.284221	1.60825	0.257286	1.40134	0.062984	0.314135	1.00658	1.31031
1528	FBgn0014000_Hf	0.993612	0.11549	0.96748	0.141639	0.993289	0.158622	0.521132	0.993612	0.00640949	0.00927509	0.11549	1.68485	0.96748	0.455018	0.141639	1.92468	0.993289	0.00673456	0.0117839	0.158622	1.40972	1.45521
1529	FBgn0014002_Pdi	0.607289	0.00579661	0.998189	0.00700659	0.385188	0.139845	0.0342795	0.607289	0.50458	0.117957	0.00579661	3.07204	0.998189	0.283351	0.00700659	3.40747	0.385188	0.975506	0.159884	0.139845	1.47637	1.82121
1530	FBgn0014006_Ask1	0.610667	0.28252	0.842354	0.435071	0.653771	0.310781	0.863586	0.610667	0.498904	0.0659687	0.28252	1.2852	0.842354	0.65401	0.435071	1.41281	0.653771	0.429226	0.0492114	0.310781	1.01358	1.26039
1531	FBgn0014007_Ptp69D	0.51916	0.00094362	0.999627	0.00114656	0.662963	0.00414438	0.00564838	0.51916	0.66564	0.0832377	0.00094362	4.06113	0.999627	0.228815	0.00114656	4.47188	0.662963	0.414991	0.0705361	0.00414438	2.86696	2.1715
1532	FBgn0014009_Rab2	0.338536	0.366205	0.699542	0.660816	0.357533	0.512652	0.91624	0.338536	1.11087	0.0726075	0.366205	1.16237	0.699542	0.80319	0.660816	1.21403	0.357533	1.05353	0.0692319	0.512652	0.654714	1.12198
1533	FBgn0014010_Rab5	0.310751	0.00245349	0.997626	0.0037327	0.50057	0.0366715	0.0146309	0.310751	1.20111	0.0537885	0.00245349	3.52253	0.997626	0.294607	0.0037327	3.75984	0.50057	0.703265	0.0375194	0.0366715	2.0894	1.83852
1534	FBgn0014011_Rac2	0.604963	0.392223	0.758109	0.630305	0.596267	0.549316	0.949596	0.604963	0.508509	0.0391779	0.392223	1.12876	0.758109	0.744725	0.630305	1.2371	0.596267	0.523334	0.0499515	0.549316	0.598786	1.1068
1535	FBgn0014018_Rel	0.569174	0.0646592	0.971296	0.0898051	0.666733	0.113859	0.330394	0.569174	0.57102	0.109636	0.0646592	1.93994	0.971296	0.444187	0.0898051	2.13385	0.666733	0.409211	0.088658	0.113859	1.58108	1.47118
1536	FBgn0014019_Rh5	0.707824	0.536042	0.657088	0.877529	0.781109	0.707647	0.990026	0.707824	0.348351	0.0736274	0.536042	0.965985	0.657088	0.844844	0.877529	1.07044	0.781109	0.248466	0.0732308	0.707647	0.375018	1.04567
1537	FBgn0014020_Rho1	0.116889	0.0281588	0.94178	0.0632712	0.227684	0.0424546	0.157496	0.116889	2.25734	0.0824457	0.0281588	2.31295	0.94178	0.51276	0.0632712	2.29719	0.227684	1.53191	0.0733661	0.0424546	2.02904	1.54863
1538	FBgn0014022_Rlb1	0.372888	0.918481	0.116658	0.19066	0.252893	0.431466	0.524914	0.372888	1.00946	0.084718	0.918481	0.552997	0.116658	1.68043	0.19066	1.78952	0.252893	1.4197	0.0833226	0.431466	-0.786685	0.821136
1539	FBgn0014023_mRpL47	0.773962	0.131532	0.950501	0.175805	0.740786	0.039792	0.216224	0.773962	0.257765	0.109305	0.131532	1.62771	0.950501	0.495331	0.175805	1.82635	0.740786	0.302146	0.127165	0.039792	2.0559	1.34495
1540	FBgn0014024_Rnp4F	0.9072	0.445638	0.770069	0.670976	0.924135	0.887725	0.970976	0.9072	0.0976133	0.0460606	0.445638	1.06449	0.770069	0.732479	0.670976	1.20654	0.924135	0.0790424	0.0405372	0.887725	0.141183	1.03461
1541	FBgn0014026_RpL7A	0.612347	0.0914951	0.960149	0.127198	0.68953	0.0633017	0.324542	0.612347	0.496094	0.118545	0.0914951	1.78709	0.960149	0.473733	0.127198	1.97377	0.68953	0.374977	0.10545	0.0633017	1.85707	1.37489
1542	FBgn0014028_SdhB	0.256607	0.0551223	0.947293	0.0975383	0.1948	0.103904	0.288371	0.256607	1.40416	0.0945975	0.0551223	2.01063	0.947293	0.50194	0.0975383	2.09568	0.1948	1.69962	0.090025	0.103904	1.62622	1.40087
1543	FBgn0014029_Sep2	0.843835	0.187386	0.927599	0.253471	0.857626	0.136624	0.585811	0.843835	0.170471	0.072779	0.187386	1.47123	0.927599	0.538127	0.253471	1.66031	0.857626	0.154137	0.060211	0.136624	1.48848	1.28914
1544	FBgn0014031_Spat	0.695272	0.427758	0.748229	0.675991	0.694201	0.418414	0.961302	0.695272	0.366542	0.0933031	0.427758	1.08538	0.748229	0.754741	0.675991	1.20288	0.694201	0.36811	0.112845	0.418414	0.809176	1.12488
1545	FBgn0014032_Sptr	0.140825	0.0236438	0.956908	0.0498901	0.150457	0.0309435	0.133737	0.140825	2.05237	0.134076	0.0236438	2.39323	0.956908	0.481316	0.0498901	2.40964	0.150457	1.98002	0.12874	0.0309435	2.1578	1.52146
1546	FBgn0014033_Sr-CI	0.983394	0.379051	0.827953	0.544501	0.989485	0.572809	0.942676	0.983394	0.0167517	0.0110996	0.379051	1.14556	0.827953	0.670464	0.544501	1.30741	0.989485	0.0105737	0.00603487	0.572809	0.563919	1.2517
1547	FBgn0014037_Su(Tpl)	0.817181	0.796183	0.393074	0.592025	0.807013	0.333436	0.91229	0.817181	0.202845	0.0287632	0.796183	0.705163	0.393074	1.12769	0.592025	1.26739	0.807013	0.215488	0.027609	0.333436	-0.967216	0.909336
1548	FBgn0014073_Tie	0.9854	0.0934934	0.975212	0.112634	0.970895	0.145229	0.445086	0.9854	0.0147131	0.00884265	0.0934934	1.7776	0.975212	0.43204	0.112634	2.02947	0.970895	0.029557	0.0123273	0.145229	1.45659	1.41823
1549	FBgn0014075_Ugt	0.188664	0.377147	0.600695	0.767617	0.133884	0.880494	0.577859	0.188664	1.73418	0.0925714	0.377147	1.14802	0.600695	0.900424	0.767617	1.13946	0.133884	2.10782	0.0690775	0.880494	0.150343	1.05429
1550	FBgn0014076_Vm32E	0.760473	0.071268	0.976523	0.090967	1	0.22185	0.358285	0.760473	0.275566	0.961177	0.071268	1.89699	0.976523	0.427689	0.090967	2.1279	1	0	4.03e-16	0.22185	1.22162	1.74352
1551	FBgn0014092_CG4278	0.731905	0.856563	0.288741	0.426697	0.786046	0.271238	0.850199	0.731905	0.314381	0.0351247	0.856563	0.637196	0.288741	1.27509	0.426697	1.42183	0.786046	0.242093	0.0333177	0.271238	-1.10022	0.861502
1552	FBgn0014127_barr	0.456595	0.446109	0.671289	0.77197	0.605394	0.668604	0.971123	0.456595	0.798426	0.0823561	0.446109	1.06395	0.671289	0.830927	0.77197	1.13659	0.605394	0.50778	0.0779448	0.668604	0.428064	1.10789
1553	FBgn0014133_bif	0.0469546	0.0883003	0.759309	0.25677	0.00953055	0.578567	0.055838	0.0469546	3.28682	0.0848377	0.0883003	1.8027	0.759309	0.743502	0.25677	1.65443	0.00953055	5.19519	0.09441	0.578567	0.555479	1.12228
1554	FBgn0014135_bnl	0.97283	0.667527	0.579069	0.910084	0.963596	0.756756	0.994438	0.97283	0.0275635	0.0183729	0.667527	0.834614	0.579069	0.922053	0.910084	1.05115	0.963596	0.037115	0.0153496	0.756756	0.309744	1.07661
1555	FBgn0014141_cher	0.905067	0.126909	0.95943	0.16151	0.855575	0.065174	0.332602	0.905067	0.099978	0.0366281	0.126909	1.64344	0.95943	0.475446	0.16151	1.86489	0.855575	0.156549	0.0422684	0.065174	1.84406	1.28414
1556	FBgn0014143_croc	0.160097	0.30142	0.652825	0.632359	0.146369	0.963357	0.613079	0.160097	1.91229	0.287418	0.30142	1.25506	0.652825	0.849023	0.632359	1.23552	0.146369	2.01012	0.244844	0.963357	0.0459418	1.03411
1557	FBgn0014163_fax	0.744612	0.00281794	0.999443	0.00306878	0.826897	0.00766445	0.0167889	0.744612	0.296924	0.0667757	0.00281794	3.4479	0.999443	0.241118	0.00306878	3.87315	0.826897	0.190918	0.0540373	0.00766445	2.6665	2.22366
1558	FBgn0014179_gcm	0.759737	0.292542	0.857767	0.429147	0.963973	0.587437	0.874628	0.759737	0.276547	0.218245	0.292542	1.26901	0.857767	0.63574	0.429147	1.41918	0.963973	0.0367229	0.0926461	0.587437	-0.542553	0.927346
1559	FBgn0014184_Oda	0.979342	0.393747	0.817473	0.56998	0.960297	0.535181	0.950349	0.979342	0.0208845	0.0136524	0.393747	1.12684	0.817473	0.682128	0.56998	1.2856	0.960297	0.0405513	0.0165669	0.535181	0.620116	1.14465
1560	FBgn0014189_Hel25E	0.69683	0.569111	0.623322	0.945152	0.602854	0.914069	0.9936	0.69683	0.364265	0.0507595	0.569111	0.932102	0.623322	0.878019	0.945152	1.03085	0.602854	0.512083	0.0670946	0.914069	0.107907	1.03108
1561	FBgn0014269_prod	0.727297	0.157879	0.933976	0.218556	0.860859	0.0861972	0.417743	0.727297	0.32079	0.0782895	0.157879	1.54723	0.933976	0.527104	0.218556	1.72757	0.860859	0.150348	0.0548993	0.0861972	1.71581	1.2502
1562	FBgn0014340_mof	0.666263	0.0225414	0.992903	0.0279727	0.883605	0.0372559	0.127852	0.666263	0.409929	0.0741062	0.0225414	2.4153	0.992903	0.348165	0.0279727	2.68999	0.883605	0.124102	0.0381418	0.0372559	2.08295	1.57933
1563	FBgn0014342_mia	0.25891	0.144447	0.867086	0.264038	0.4533	0.222751	0.607825	0.25891	1.39464	0.131099	0.144447	1.58647	0.867086	0.624298	0.264038	1.64175	0.4533	0.80594	0.0906584	0.222751	1.21925	1.40716
1564	FBgn0014343_mirr	0.42994	0.443522	0.664474	0.776072	0.197224	0.876718	0.732351	0.42994	0.860898	0.0711725	0.443522	1.06693	0.664474	0.837605	0.776072	1.1339	0.197224	1.68628	0.080779	0.876718	0.15513	1.05615
1565	FBgn0014366_noi	0.97474	0.126517	0.962523	0.157496	0.978738	0.0952236	0.451411	0.97474	0.0255998	0.0179004	0.126517	1.6448	0.962523	0.46793	0.157496	1.87634	0.978738	0.0215019	0.0161265	0.0952236	1.66846	1.34697
1566	FBgn0014368_nol	0.300436	0.402198	0.648173	0.7488	0.428102	0.637719	0.88279	0.300436	1.23679	0.505197	0.402198	1.11631	0.648173	0.853585	0.7488	1.15199	0.428102	0.865355	0.414342	0.637719	0.470891	1.06771
1567	FBgn0014380_RhoL	0.55056	0.0183418	0.992654	0.0240887	0.492159	0.0124959	0.0726719	0.55056	0.60518	0.108313	0.0183418	2.5113	0.992654	0.350099	0.0240887	2.7641	0.492159	0.720771	0.127616	0.0124959	2.49782	1.49459
1568	FBgn0014388_sty	0.797263	0.432426	0.763093	0.665294	0.755947	0.818842	0.96657	0.797263	0.227768	0.0909924	0.432426	1.07987	0.763093	0.739638	0.665294	1.21072	0.755947	0.281613	0.0872375	0.818842	0.229035	1.01112
1569	FBgn0014391_sun	0.0316049	0.0437875	0.80939	0.146836	0.0284	0.103666	0.15875	0.0316049	3.74744	0.191361	0.0437875	2.11326	0.80939	0.690969	0.146836	1.90825	0.0284	3.87331	0.212575	0.103666	1.62733	1.38866
1570	FBgn0014395_tilB	0.725647	0.899407	0.219169	0.3141	0.594449	0.145982	0.612026	0.725647	0.323095	0.105265	0.899407	0.581494	0.219169	1.40105	0.3141	1.56269	0.594449	0.526462	0.159452	0.145982	-1.45387	0.79302
1571	FBgn0014396_tim	0.295195	0.572393	0.477776	0.903269	0.288404	0.821377	0.870163	0.295195	1.2554	0.0934241	0.572393	0.928783	0.477776	1.02825	0.903269	1.05515	0.288404	1.28005	0.0955751	0.821377	-0.225774	0.96309
1572	FBgn0014411_Vps26	0.514829	0.1411	0.922611	0.21311	0.553037	0.399504	0.598528	0.514829	0.674278	0.0421205	0.1411	1.5968	0.922611	0.546379	0.21311	1.73902	0.553037	0.600565	0.0429489	0.399504	0.842508	1.19824
1573	FBgn0014417_CG13397	0.418755	0.00653964	0.996254	0.00911955	0.405682	0.00639118	0.0377396	0.418755	0.888331	0.0862428	0.00653964	3.01118	0.996254	0.315209	0.00911955	3.26512	0.405682	0.921383	0.0870409	0.00639118	2.72701	1.92441
1574	FBgn0014427_CG11899	0.278482	0.0880881	0.922653	0.154627	0.276202	0.13369	0.424935	0.278482	1.31717	0.186638	0.0880881	1.80376	0.922653	0.546311	0.154627	1.88471	0.276202	1.3259	0.175288	0.13369	1.49971	1.44168
1575	FBgn0014454_Acp1	0.53602	0.0215315	0.990934	0.0287531	0.360112	0.923525	0.122432	0.53602	0.632716	0.480822	0.0215315	2.43654	0.990934	0.3623	0.0287531	2.67643	0.360112	1.04599	0.257427	0.923525	0.0959947	1.04089
1576	FBgn0014455_Ahcy	0.820334	0.0275635	0.993293	0.0321891	0.718636	0.0289749	0.154395	0.820334	0.198958	0.104865	0.0275635	2.32273	0.993293	0.345024	0.0321891	2.62104	0.718636	0.332953	0.156835	0.0289749	2.18383	1.73346
1577	FBgn0014464_Cp7Fa	0.591404	0.296351	0.828989	0.462385	0.778315	0.387353	0.878623	0.591404	0.531725	0.233043	0.296351	1.26298	0.828989	0.669298	0.462385	1.38443	0.778315	0.25209	0.140341	0.387353	0.864428	1.21628
1578	FBgn0014465_Cp7Fb	0.215648	0.439929	0.559186	0.876689	0.297462	0.57757	0.767155	0.215648	1.59017	0.424886	0.439929	1.0711	0.559186	0.942183	0.876689	1.07094	0.297462	1.24731	0.37705	0.57757	0.556938	1.12254
1579	FBgn0014466_Cp7Fc	0.0161977	0.577804	0.109913	0.41426	0.00268419	0.415735	0.0159974	0.0161977	4.54472	0.862856	0.577804	0.923326	0.109913	1.70658	0.41426	1.43555	0.00268419	6.81578	1.00312	0.415735	-0.813843	0.883055
1580	FBgn0014469_Cyp4e2	0.302533	0.0710083	0.941691	0.12054	0.226252	0.160862	0.357207	0.302533	1.22943	0.0757842	0.0710083	1.8986	0.941691	0.512929	0.12054	1.99837	0.226252	1.53867	0.0851717	0.160862	1.40218	1.29489
1581	FBgn0014848_Eig71Eh	NA	NA	NA	NA	NA	NA	1	NA	NA	NA	NA	NA	NA	NA	NA	NA	NA	NA	NA	NA	NA	NA
1582	FBgn0014849_Eig71Ei	NA	NA	NA	NA	NA	NA	1	NA	NA	NA	NA	NA	NA	NA	NA	NA	NA	NA	NA	NA	NA	NA
1583	FBgn0014850_Eig71Ej	NA	NA	NA	NA	NA	NA	1	NA	NA	NA	NA	NA	NA	NA	NA	NA	NA	NA	NA	NA	NA	NA
1584	FBgn0014851_Eig71Ek	NA	NA	NA	NA	NA	NA	1	NA	NA	NA	NA	NA	NA	NA	NA	NA	NA	NA	NA	NA	NA	NA
1585	FBgn0014857_His3.3A	0.539665	0.136144	0.928639	0.202357	0.69965	0.184222	0.584428	0.539665	0.625739	0.177752	0.136144	1.61254	0.928639	0.536367	0.202357	1.76251	0.69965	0.360158	0.153427	0.184222	1.32787	1.32548
1586	FBgn0014859_Hr38	0.981654	0.00469334	0.999427	0.0046885	0.870231	0.0234584	0.0278033	0.981654	0.0185243	0.0210098	0.00469334	3.17991	0.999427	0.241995	0.0046885	3.6302	0.870231	0.139447	0.0494952	0.0234584	2.26589	1.88451
1587	FBgn0014861_Mcm2	0.221371	0.416907	0.586208	0.825174	0.309366	0.815758	0.777165	0.221371	1.56205	0.210119	0.416907	1.09835	0.586208	0.914885	0.825174	1.1025	0.309366	1.20583	0.197239	0.815758	0.233005	1.05948
1588	FBgn0014863_Mlp84B	0.714753	0.952169	0.120486	0.163516	0.640803	0.158563	0.537134	0.714753	0.338454	0.0647502	0.952169	0.491795	0.120486	1.66626	0.163516	1.85928	0.640803	0.449671	0.0719641	0.158563	-1.40992	0.682035
1589	FBgn0014865_Mtk	0.733521	1	3.95e-10	3.46e-10	0.543851	0.927813	2.08e-09	0.733521	0.312144	0.615647	1	0.0481009	3.95e-10	22.2747	3.46e-10	25.0782	0.543851	0.617789	0.222636	0.927813	0.0905964	1.23999
1590	FBgn0014868_Ost48	0.930051	0.133523	0.957781	0.169449	0.934885	0.0328924	0.18182	0.930051	0.0726379	0.0569031	0.133523	1.6211	0.957781	0.479309	0.169449	1.84308	0.934885	0.0674375	0.0519468	0.0328924	2.13339	1.30888
1591	FBgn0014869_Pglym78	0.646765	0.0385874	0.986305	0.0498303	0.552324	0.0763777	0.210306	0.646765	0.440218	0.104134	0.0385874	2.17003	0.986305	0.388388	0.0498303	2.41021	0.552324	0.601892	0.143376	0.0763777	1.7721	1.53662
1592	FBgn0014870_Psi	0.750108	0.985954	0.046079	0.0572849	0.553544	0.149967	0.246515	0.750108	0.28947	0.0446211	0.985954	0.390091	0.046079	2.09044	0.0572849	2.34406	0.553544	0.599623	0.0606577	0.149967	-1.43965	0.611034
1593	FBgn0014877_Roe1	0.525583	0.234158	0.86158	0.367031	0.592377	0.327029	0.79824	0.525583	0.652967	0.10511	0.234158	1.37116	0.86158	0.631098	0.367031	1.49138	0.592377	0.53004	0.104271	0.327029	0.980116	1.16718
1594	FBgn0014879_Set	0.642124	0.309679	0.828411	0.476341	0.309382	0.762488	0.891501	0.642124	0.447569	0.0490931	0.309679	1.24239	0.828411	0.669949	0.476341	1.37052	0.309382	1.20578	0.0838897	0.762488	0.302216	1.08858
1595	FBgn0014903_CG14630	0.132503	0.00275461	0.991261	0.0058157	0.186449	0.0231466	0.0164142	0.132503	2.1192	0.265158	0.00275461	3.46009	0.991261	0.360116	0.0058157	3.50986	0.186449	1.74695	0.225338	0.0231466	2.27101	1.68016
1596	FBgn0014906_Hydr2	0.146181	0.584332	0.354193	0.757628	0.316125	0.776884	0.612569	0.146181	2.01152	0.0821891	0.584332	0.916766	0.354193	1.17851	0.757628	1.14608	0.316125	1.18302	0.0559124	0.776884	-0.283381	0.875113
1597	FBgn0014930_CG2846	0.730478	0.000231515	0.999962	0.000236319	0.737596	0.0012231	0.00138828	0.730478	0.316361	0.0485647	0.000231515	4.93699	0.999962	0.172969	0.000236319	5.54595	0.737596	0.306523	0.0386174	0.0012231	3.23344	2.34747
1598	FBgn0014931_CG2678	0.688478	0.345715	0.810246	0.530753	0.45805	0.534491	0.921548	0.688478	0.376531	0.0755824	0.345715	1.19016	0.810246	0.690039	0.530753	1.31956	0.45805	0.795127	0.0875922	0.534491	0.621165	1.14089
1599	FBgn0014949_btn	0.252592	0.659195	0.363176	0.696116	1	0.0396093	0.215329	0.252592	1.42097	2.35798	0.659195	0.842779	0.363176	1.1664	0.696116	1.1884	1	0	1.29e-16	0.0396093	2.0578	1.95534
1600	FBgn0015000_betaggt-I	0.461639	0.185554	0.88449	0.29485	0.521027	0.226172	0.708141	0.461639	0.787035	0.044625	0.185554	1.4756	0.88449	0.60194	0.29485	1.59153	0.521027	0.661939	0.0382572	0.226172	1.21028	1.2342
1601	FBgn0015001_iotaTry	0.148992	0.679794	0.265713	0.565733	0.305991	0.795379	0.620159	0.148992	1.9907	0.801196	0.679794	0.82259	0.265713	1.31349	0.565733	1.28918	0.305991	1.21742	0.528175	0.795379	-0.259332	0.965774
1602	FBgn0015008_Actn3	NA	NA	NA	NA	NA	NA	1	NA	NA	NA	NA	NA	NA	NA	NA	NA	NA	NA	NA	NA	NA	NA
1603	FBgn0015010_Ag5r	0.160945	3.15e-07	0.99998	5.78e-07	0.192348	0.709692	1.89e-06	0.160945	1.90654	1.05521	3.15e-07	10.9369	0.99998	0.161154	5.78e-07	11.3998	0.192348	1.71329	0.412655	0.709692	-0.372269	0.878753
1604	FBgn0015011_AhcyL2	0.426971	0.327233	0.765663	0.556113	0.396148	0.333071	0.907277	0.426971	0.868106	0.105346	0.327233	1.21636	0.765663	0.737007	0.556113	1.29736	0.396148	0.946198	0.114964	0.333071	0.967948	1.21489
1605	FBgn0015019_CCT3	0.981429	0.184518	0.937956	0.239048	0.937477	0.365835	0.705907	0.981429	0.0187542	0.0168112	0.184518	1.47809	0.937956	0.519917	0.239048	1.68691	0.937477	0.0646598	0.0401395	0.365835	0.904303	1.17459
1606	FBgn0015024_CkIalpha	0.232182	0.0147905	0.982549	0.026097	0.232077	0.14463	0.0855256	0.232182	1.51096	0.0580644	0.0147905	2.61279	0.982549	0.405247	0.026097	2.72431	0.232077	1.51145	0.056683	0.14463	1.45877	1.59636
1607	FBgn0015025_CkIIalpha-i1	0.905077	0.944263	0.161342	0.21053	0.774692	0.27973	0.652056	0.905077	0.099967	0.0253664	0.944263	0.507964	0.161342	1.53764	0.21053	1.74454	0.774692	0.256812	0.0472046	0.27973	-1.08093	0.729572
1608	FBgn0015031_cype	0.916632	0.00404794	0.999448	0.00412526	0.914866	0.00325928	0.019397	0.916632	0.0872254	0.0634399	0.00404794	3.25654	0.999448	0.240824	0.00412526	3.70268	0.914866	0.0891616	0.0726222	0.00325928	2.94216	1.98035
1609	FBgn0015032_Cyp4c3	0.992967	0.0469054	0.99	0.0532227	0.928522	0.0814663	0.250423	0.992967	0.00705914	0.012605	0.0469054	2.0825	0.99	0.368226	0.0532227	2.37889	0.928522	0.074289	0.044165	0.0814663	1.74224	1.54062
1610	FBgn0015033_Cyp4d8	0.0435997	0.0672806	0.79045	0.201898	0.0548194	0.185302	0.234688	0.0435997	3.37243	0.138207	0.0672806	1.92239	0.79045	0.711239	0.201898	1.76354	0.0548194	3.10893	0.146478	0.185302	1.32461	1.27445
1611	FBgn0015034_Cyp4e1	0.51097	0.165115	0.906536	0.252976	0.693679	0.166008	0.661343	0.51097	0.682038	0.0874864	0.165115	1.52741	0.906536	0.571196	0.252976	1.66119	0.693679	0.368875	0.060821	0.166008	1.38515	1.26697
1612	FBgn0015035_Cyp4e3	0.446838	0.0193717	0.989724	0.027433	0.328435	0.0427384	0.110745	0.446838	0.820841	0.382126	0.0193717	2.48574	0.989724	0.369902	0.027433	2.6996	0.328435	1.14275	0.44651	0.0427384	2.02626	1.77468
1613	FBgn0015036_Cyp4ae1	0.647604	0.0205024	0.99337	0.0255715	0.64149	0.0596556	0.116879	0.647604	0.438895	0.0897823	0.0205024	2.4593	0.99337	0.344392	0.0255715	2.7344	0.64149	0.448578	0.0972752	0.0596556	1.88333	1.72026
1614	FBgn0015037_Cyp4p1	0.187192	0.268424	0.709134	0.543061	0.279207	0.381603	0.711645	0.187192	1.74265	0.0962883	0.268424	1.30882	0.709134	0.793732	0.543061	1.30867	0.279207	1.31442	0.0923203	0.381603	0.874946	1.13204
1615	FBgn0015038_Cyp9b1	0.539628	0.58907	0.561256	0.971865	0.508518	0.794262	0.985906	0.539628	0.625809	0.0639332	0.58907	0.91202	0.561256	0.940075	0.971865	1.0157	0.508518	0.687002	0.0673099	0.794262	-0.26078	0.977614
1616	FBgn0015039_Cyp9b2	0.549468	0.00364774	0.998679	0.00450621	0.474701	0.00383435	0.0216878	0.549468	0.607221	0.0865147	0.00364774	3.31098	0.998679	0.271035	0.00450621	3.65257	0.474701	0.758131	0.0989057	0.00383435	2.89148	1.89472
1617	FBgn0015040_Cyp9c1	0.456787	0.304356	0.792972	0.505896	0.310627	0.569065	0.886676	0.456787	0.797992	0.135603	0.304356	1.25052	0.792972	0.708572	0.505896	1.34223	0.310627	1.20154	0.168826	0.569065	0.569429	1.16122
1618	FBgn0015075_Ddx1	0.642816	0.0769966	0.969069	0.104162	0.544975	0.0914899	0.381671	0.642816	0.446469	0.108145	0.0769966	1.86293	0.969069	0.450612	0.104162	2.06541	0.544975	0.615666	0.113962	0.0914899	1.68759	1.39202
1619	FBgn0015218_eIF4E1	0.375862	0.0532423	0.964413	0.083433	0.308192	0.13728	0.279833	0.375862	1.00114	0.0495361	0.0532423	2.02604	0.964413	0.463143	0.083433	2.16796	0.308192	1.20985	0.0470378	0.13728	1.486	1.61256
1620	FBgn0015221_Fer2LCH	0.626029	0.000282747	0.999929	0.000309197	0.485721	0.00399676	0.00169528	0.626029	0.473497	0.0552045	0.000282747	4.80573	0.999929	0.18635	0.000309197	5.35237	0.485721	0.734385	0.0695438	0.00399676	2.87842	2.38559
1621	FBgn0015222_Fer1HCH	0.799322	0.104902	0.963992	0.136073	0.992967	0.411008	0.485693	0.799322	0.225162	0.032346	0.104902	1.72706	0.963992	0.464223	0.136073	1.94296	0.992967	0.00705907	0.00752555	0.411008	0.822121	1.22548
1622	FBgn0015229_glec	0.944906	0.0033479	0.999588	0.00334594	0.871771	0.0105499	0.0199085	0.944906	0.0567448	0.0231918	0.0033479	3.35617	0.999588	0.231797	0.00334594	3.8229	0.871771	0.137667	0.033747	0.0105499	2.55726	1.99031
1623	FBgn0015230_Glut3	NA	NA	NA	NA	NA	NA	1	NA	NA	NA	NA	NA	NA	NA	NA	NA	NA	NA	NA	NA	NA	NA
1624	FBgn0015239_Hr78	0.859128	0.420873	0.781799	0.634367	0.817239	0.918342	0.962274	0.859128	0.152375	0.0269143	0.420873	1.09358	0.781799	0.720318	0.634367	1.23397	0.817239	0.202774	0.0255466	0.918342	0.102523	1.02388
1625	FBgn0015240_Hr96	0.943196	0.0853198	0.976896	0.103327	0.978012	0.0980938	0.41438	0.943196	0.0585613	0.0163709	0.0853198	1.81779	0.976896	0.426422	0.103327	2.06911	0.978012	0.022245	0.0110618	0.0980938	1.65417	1.47073
1626	FBgn0015245_Hsp60A	0.58282	0.0450078	0.98149	0.0606957	0.59345	0.0483871	0.241424	0.58282	0.546713	0.121906	0.0450078	2.10096	0.98149	0.409537	0.0606957	2.31676	0.59345	0.528186	0.1208	0.0483871	1.97395	1.58464
1627	FBgn0015247_Diap2	0.631159	0.00521915	0.998489	0.00619332	0.661727	0.00590494	0.0309091	0.631159	0.465158	0.0765809	0.00521915	3.12544	0.998489	0.276169	0.00619332	3.47512	0.661727	0.416892	0.081912	0.00590494	2.75301	2.00467
1628	FBgn0015268_Nap1	0.602198	0.0669898	0.971844	0.0916142	0.67296	0.113731	0.340343	0.602198	0.513199	0.119915	0.0669898	1.9243	0.971844	0.442555	0.0916142	2.12462	0.67296	0.39974	0.104603	0.113731	1.58164	1.46083
1629	FBgn0015269_Nf1	0.311806	0.212186	0.825697	0.376444	0.344788	0.261195	0.76092	0.311806	1.19754	0.0691368	0.212186	1.41562	0.825697	0.672996	0.376444	1.47973	0.344788	1.09163	0.0704003	0.261195	1.12357	1.20457
1630	FBgn0015270_Orc2	0.392603	0.764786	0.315445	0.544521	0.619094	0.366819	0.897091	0.392603	0.955584	0.394078	0.764786	0.737906	0.315445	1.23371	0.544521	1.3074	0.619094	0.484885	0.225114	0.366819	-0.902448	0.84597
1631	FBgn0015271_Orc5	0.73921	0.486432	0.707998	0.775801	0.506377	0.72179	0.981652	0.73921	0.304307	0.0894318	0.486432	1.01875	0.707998	0.794854	0.775801	1.13408	0.506377	0.691356	0.131288	0.72179	0.356068	1.06084
1632	FBgn0015277_Pi3K59F	0.647862	0.0893579	0.963376	0.121908	0.657708	0.0123927	0.0720905	0.647862	0.438489	0.141414	0.0893579	1.79747	0.963376	0.46579	0.121908	1.99321	0.657708	0.423103	0.126331	0.0123927	2.50076	1.38321
1633	FBgn0015278_Pi3K68D	0.750531	0.115225	0.956842	0.153548	0.956108	0.171134	0.52027	0.750531	0.288898	0.0350211	0.115225	1.68586	0.956842	0.481465	0.153548	1.88789	0.956108	0.0449311	0.0104827	0.171134	1.36857	1.33385
1634	FBgn0015279_Pi3K92E	0.995615	0.176137	0.942549	0.22603	0.843245	0.139249	0.593307	0.995615	0.00439518	0.00455879	0.176137	1.49876	0.942549	0.511287	0.22603	1.71232	0.843245	0.171175	0.022943	0.139249	1.47859	1.67271
1635	FBgn0015282_Rpt2	0.848735	0.574954	0.649628	0.924287	0.843331	0.954308	0.994103	0.848735	0.164635	0.0516818	0.574954	0.926197	0.649628	0.852157	0.924287	1.04287	0.843331	0.171073	0.0679284	0.954308	-0.0572981	0.985734
1636	FBgn0015283_Rpn10	0.984907	0.0553749	0.98748	0.0638096	0.950136	0.0461879	0.247031	0.984907	0.0152136	0.0174641	0.0553749	2.0086	0.98748	0.382451	0.0638096	2.29321	0.950136	0.0512115	0.0297606	0.0461879	1.99367	1.5921
1637	FBgn0015286_Rala	0.924542	0.0977495	0.971801	0.120573	0.878028	0.28373	0.460536	0.924542	0.0785999	0.0232795	0.0977495	1.75806	0.971801	0.442683	0.120573	1.99825	0.878028	0.130472	0.0262188	0.28373	1.07198	1.44262
1638	FBgn0015288_RpL22	0.61346	0.000141283	0.999963	0.000153505	0.673032	0.000997782	0.000847401	0.61346	0.494235	0.0875028	0.000141283	5.27142	0.999963	0.172692	0.000153505	5.86663	0.673032	0.39963	0.111211	0.000997782	3.29115	2.70869
1639	FBgn0015295_Shark	0.794713	0.122458	0.955936	0.161346	0.778486	0.122245	0.542658	0.794713	0.231006	0.0666243	0.122458	1.65913	0.955936	0.48352	0.161346	1.86536	0.778486	0.251868	0.0684742	0.122245	1.54542	1.48388
1640	FBgn0015296_Shc	0.974589	0.154637	0.950906	0.19668	0.998733	0.0355243	0.195089	0.974589	0.0257551	0.0356612	0.154637	1.5564	0.950906	0.49448	0.19668	1.77542	0.998733	0.00126825	0.00345456	0.0355243	2.10233	1.3388
1641	FBgn0015298_Srp19	0.774629	0.390082	0.791759	0.593714	0.771545	0.584386	0.948521	0.774629	0.256894	0.0353784	0.390082	1.13146	0.791759	0.709855	0.593714	1.26602	0.771545	0.260931	0.0369025	0.584386	0.546989	1.08732
1642	FBgn0015299_Ssb-c31a	0.174899	0.0201411	0.969254	0.0394247	0.0371027	0.0347342	0.114923	0.174899	1.8162	0.0985486	0.0201411	2.46758	0.969254	0.450091	0.0394247	2.52253	0.0371027	3.55981	0.140244	0.0347342	2.11144	1.46761
1643	FBgn0015300_Ssl	0.860928	0.0362039	0.99125	0.0423091	0.72234	0.789088	0.198486	0.860928	0.150267	0.296817	0.0362039	2.19878	0.99125	0.360189	0.0423091	2.48851	0.72234	0.327732	0.220808	0.789088	0.267495	1.15429
1644	FBgn0015316_Try29F	0.296906	0.650471	0.397878	0.741961	0.193892	0.73793	0.725616	0.296906	1.24929	0.143725	0.650471	0.851331	0.397878	1.12167	0.741961	1.1566	0.193892	1.70466	0.152371	0.73793	-0.334596	0.883487
1645	FBgn0015320_Ubc2	0.781945	0.206211	0.912447	0.287798	0.622637	0.2866	0.749833	0.781945	0.247383	0.0452219	0.206211	1.42844	0.912447	0.562352	0.287798	1.60256	0.622637	0.479051	0.0536453	0.2866	1.06561	1.35523
1646	FBgn0015321_Ubc4	0.753185	0.00287894	0.999442	0.0031237	0.801389	0.00216515	0.0129208	0.753185	0.285321	0.0616057	0.00287894	3.43643	0.999442	0.241137	0.0031237	3.86281	0.801389	0.222553	0.0529637	0.00216515	3.06659	2.04737
1647	FBgn0015331_abs	0.523661	0.256265	0.84529	0.405527	0.360096	0.218744	0.772616	0.523661	0.656742	0.144144	0.256265	1.33009	0.84529	0.650586	0.405527	1.44541	0.360096	1.04603	0.138559	0.218744	1.22988	1.15224
1648	FBgn0015336_CG15865	0.234136	0.352527	0.658139	0.685427	1	0.417534	0.798205	0.234136	1.502	1.46684	0.352527	1.18078	0.658139	0.843813	0.685427	1.19605	1	0	5.18e-17	0.417534	-0.810707	0.673868
1649	FBgn0015338_CG5861	0.979148	0.563054	0.683225	0.877839	0.923979	0.901402	0.993041	0.979148	0.0210827	0.0131895	0.563054	0.938247	0.683225	0.819224	0.877839	1.07025	0.923979	0.0792119	0.0231519	0.901402	0.12389	1.00835
1650	FBgn0015351_CG14906	0.338362	0.152136	0.883725	0.259296	0.518251	0.0600681	0.31043	0.338362	1.11141	0.112487	0.152136	1.5636	0.883725	0.602953	0.259296	1.64998	0.518251	0.667447	0.109166	0.0600681	1.88029	1.34732
1651	FBgn0015359_CG2034	0.992442	0.360182	0.841419	0.511768	0.961971	0.397565	0.931398	0.992442	0.00758842	0.00996866	0.360182	1.17041	0.841419	0.655094	0.511768	1.33679	0.961971	0.0388059	0.0245365	0.397565	0.845978	1.1448
1652	FBgn0015360_oxt	0.686706	0.312736	0.833596	0.474083	0.471779	0.333598	0.894624	0.686706	0.379154	0.0567256	0.312736	1.23777	0.833596	0.664079	0.474083	1.37275	0.471779	0.764525	0.0720777	0.333598	0.966893	1.28435
1653	FBgn0015371_chn	0.217146	5.01e-05	0.999792	8.33e-05	0.00351054	0.0183686	0.000300588	0.217146	1.58273	0.073908	5.01e-05	6.02347	0.999792	0.212507	8.33e-05	6.34338	0.00351054	6.4645	0.104558	0.0183686	2.3581	2.44578
1654	FBgn0015372_RabX1	0.623925	0.341199	0.8019	0.534749	0.540786	0.550994	0.918243	0.623925	0.476938	0.0696863	0.341199	1.19645	0.8019	0.699055	0.534749	1.316	0.540786	0.623605	0.0826495	0.550994	0.596271	1.14957
1655	FBgn0015376_cutlet	0.768838	0.282425	0.86546	0.411208	0.833746	0.555809	0.863477	0.768838	0.264489	0.0900866	0.282425	1.28535	0.86546	0.626318	0.411208	1.43897	0.833746	0.182598	0.0548388	0.555809	0.589078	1.06471
1656	FBgn0015379_dod	0.815042	0.364763	0.816286	0.543202	0.680095	0.768856	0.934293	0.815042	0.205491	0.0879661	0.364763	1.16429	0.816286	0.683434	0.543202	1.30855	0.680095	0.389	0.121256	0.768856	-0.293872	0.914899
1657	FBgn0015380_drl	0.196016	0.358747	0.625049	0.723766	0.10916	0.69062	0.500198	0.196016	1.6929	0.0833503	0.358747	1.17234	0.625049	0.876316	0.723766	1.16903	0.10916	2.33305	0.0949352	0.69062	0.398013	1.08917
1658	FBgn0015381_dsf	0.640428	0.361866	0.789379	0.568155	0.560456	0.784498	0.932474	0.640428	0.450268	0.171689	0.361866	1.16815	0.789379	0.712368	0.568155	1.28713	0.560456	0.586871	0.202333	0.784498	0.273463	1.04754
1659	FBgn0015391_glu	0.652598	0.744857	0.421187	0.672857	0.690473	0.424257	0.962397	0.652598	0.431058	0.0658107	0.744857	0.758142	0.421187	1.0932	0.672857	1.20516	0.690473	0.373587	0.0728821	0.424257	-0.799058	0.915398
1660	FBgn0015393_hoip	0.048053	0.00389954	0.967222	0.0120123	0.108187	0.0215682	0.0231703	0.048053	3.26018	0.26094	0.00389954	3.27602	0.967222	0.455721	0.0120123	3.11938	0.108187	2.34298	0.222919	0.0215682	2.29789	1.86422
1661	FBgn0015396_jumu	0.207783	0.0723033	0.919062	0.137569	0.144177	0.1685	0.362565	0.207783	1.6301	0.0961111	0.0723033	1.89063	0.919062	0.552077	0.137569	1.93797	0.144177	2.02662	0.0959579	0.1685	1.37704	1.36495
1662	FBgn0015399_kek1	0.285433	0.43848	0.605343	0.829268	0.21067	0.841569	0.758147	0.285433	1.29102	0.0755266	0.43848	1.07278	0.605343	0.895806	0.829268	1.09994	0.21067	1.61526	0.0819407	0.841569	0.199886	1.1069
1663	FBgn0015400_kek2	0.822444	0.468949	0.738118	0.727356	0.716823	0.92222	0.977571	0.822444	0.196367	0.029845	0.468949	1.03805	0.738118	0.764912	0.727356	1.16656	0.716823	0.335517	0.0359055	0.92222	-0.097638	0.987565
1664	FBgn0015402_ksr	0.795873	0.400005	0.787734	0.607673	0.810911	0.602538	0.953346	0.795873	0.229532	0.065219	0.400005	1.11903	0.787734	0.7141	0.607673	1.25481	0.810911	0.210622	0.0647205	0.602538	0.520755	1.06693
1665	FBgn0015477_Rme-8	0.898549	0.662666	0.570757	0.906725	0.674854	0.842652	0.993745	0.898549	0.10724	0.0242634	0.662666	0.839377	0.570757	0.930436	0.906725	1.05311	0.674854	0.396878	0.0412106	0.842652	-0.198503	0.956931
1666	FBgn0015509_Cul1	0.656757	0.456419	0.716335	0.737223	0.722609	0.998113	0.974202	0.656757	0.42458	0.0476077	0.456419	1.05216	0.716335	0.78661	0.737223	1.15981	0.722609	0.327353	0.0417765	0.998113	-0.00236524	0.999521
1667	FBgn0015513_mbc	0.5721	0.136194	0.932087	0.199113	0.644116	0.146916	0.584569	0.5721	0.565757	0.0425909	0.136194	1.61239	0.932087	0.53043	0.199113	1.76984	0.644116	0.444406	0.0347389	0.146916	1.45051	1.47094
1668	FBgn0015519_nAChRalpha3	0.893174	0.341892	0.842093	0.493549	0.846384	0.665897	0.918757	0.893174	0.113271	0.0403482	0.341892	1.19548	0.842093	0.654313	0.493549	1.35386	0.846384	0.16743	0.0464878	0.665897	0.431786	1.10432
1669	FBgn0015520_nonA-l	0.0174873	0.0030747	0.933688	0.0137544	0.0181896	0.023341	0.018307	0.0174873	4.45208	0.112819	0.0030747	3.40133	0.933688	0.527615	0.0137544	3.04883	0.0181896	4.4046	0.120525	0.023341	2.26781	1.75199
1670	FBgn0015521_RpS21	0.410999	0.0320577	0.980842	0.0477074	0.553857	0.0690276	0.177574	0.410999	0.907807	0.148855	0.0320577	2.25386	0.980842	0.412082	0.0477074	2.43097	0.553857	0.599042	0.134164	0.0690276	1.81824	1.49269
1671	FBgn0015522_olf186-M	0.346006	0.109848	0.918752	0.18283	0.454995	0.220071	0.502509	0.346006	1.08793	0.0988637	0.109848	1.70684	0.918752	0.552568	0.18283	1.80856	0.454995	0.802068	0.0930207	0.220071	1.22634	1.41561
1672	FBgn0015524_otp	0.66793	0.0077814	0.997873	0.00918308	0.722423	0.062942	0.0457895	0.66793	0.407384	0.0718519	0.0077814	2.92439	0.997873	0.289952	0.00918308	3.26141	0.722423	0.327616	0.0512925	0.062942	1.8596	1.84239
1673	FBgn0015527_peng	0.907314	0.0773215	0.97873	0.0939806	0.930751	0.0303031	0.168589	0.907314	0.0974874	0.0829601	0.0773215	1.86108	0.97873	0.419981	0.0939806	2.11283	0.930751	0.071883	0.045401	0.0303031	2.16611	1.56065
1674	FBgn0015543_snoRNA:Me28S-A1322	0.334358	0.0303597	0.977189	0.0483001	0.0878084	0.336183	0.16888	0.334358	1.12393	0.582609	0.0303597	2.27861	0.977189	0.425417	0.0483001	2.42508	0.0878084	2.57555	0.67888	0.336183	0.961735	1.45749
1675	FBgn0015544_spag	0.733101	0.430611	0.753185	0.673747	0.803369	0.514273	0.965924	0.733101	0.312725	0.0552024	0.430611	1.08201	0.753185	0.749727	0.673747	1.20451	0.803369	0.220059	0.0511403	0.514273	0.652199	1.095
1676	FBgn0015546_spel1	0.0466096	0.413578	0.348866	0.925455	0.0762147	0.879732	0.249027	0.0466096	3.29533	0.160501	0.413578	1.10237	0.348866	1.1858	0.925455	1.04219	0.0762147	2.73464	0.155354	0.879732	-0.151309	0.988586
1677	FBgn0015550_tap	0.655099	0.141408	0.936875	0.199565	0.820682	0.345141	0.599391	0.655099	0.427157	0.386812	0.141408	1.59584	0.936875	0.521895	0.199565	1.76881	0.820682	0.198531	0.270833	0.345141	0.944056	1.31225
1678	FBgn0015553_tos	0.676654	0.0435724	0.985078	0.0558389	0.879737	0.042508	0.229432	0.676654	0.394165	0.12361	0.0435724	2.11547	0.985078	0.394218	0.0558389	2.35615	0.879737	0.128515	0.0784093	0.042508	2.02851	1.51469
1679	FBgn0015558_tty	0.679763	0.0414857	0.985991	0.0529241	0.447703	0.154041	0.224483	0.679763	0.389497	0.0344168	0.0414857	2.13747	0.985991	0.389913	0.0529241	2.38157	0.447703	0.818834	0.0465437	0.154041	1.4254	1.6089
1680	FBgn0015561_unpg	0.0493767	0.164927	0.645009	0.459248	0.101218	0.868723	0.26201	0.0493767	3.2289	0.719605	0.164927	1.52792	0.645009	0.856689	0.459248	1.38761	0.101218	2.41694	0.589645	0.868723	-0.165281	0.964259
1681	FBgn0015568_alpha-Est1	0.48937	0.268385	0.8291	0.433696	0.385779	0.577949	0.846645	0.48937	0.726647	0.102463	0.268385	1.30889	0.8291	0.669173	0.433696	1.41428	0.385779	0.973904	0.124544	0.577949	0.556383	1.16174
1682	FBgn0015569_alpha-Est10	0.241269	0.0914416	0.910243	0.167635	0.114789	0.314533	0.437507	0.241269	1.46991	0.105962	0.0914416	1.78735	0.910243	0.565686	0.167635	1.84797	0.114789	2.27738	0.109056	0.314533	1.00576	1.35519
1683	FBgn0015570_alpha-Est2	0.107983	3.88e-05	0.999285	8.68e-05	0.0934501	0.00900862	0.000233077	0.107983	2.34508	0.192372	3.88e-05	6.21908	0.999285	0.249229	8.68e-05	6.31017	0.0934501	2.50593	0.148885	0.00900862	2.61173	2.51789
1684	FBgn0015571_alpha-Est3	0.655349	0.029079	0.99028	0.0367894	0.726433	0.00945636	0.0554136	0.655349	0.426768	0.091839	0.029079	2.29826	0.99028	0.366495	0.0367894	2.556	0.726433	0.321996	0.0906874	0.00945636	2.5951	1.5473
1685	FBgn0015572_alpha-Est4	0.95423	0.433624	0.785738	0.642632	0.937231	0.633994	0.966991	0.95423	0.0469013	0.0241614	0.433624	1.07846	0.785738	0.716196	0.642632	1.22767	0.937231	0.0649238	0.0277039	0.633994	0.476113	1.07369
1686	FBgn0015574_alpha-Est6	0.0966414	0.996489	0.000392444	0.000926831	1	0.0156894	0.00235236	0.0966414	2.46846	2.651	0.996489	0.312148	0.000392444	4.59541	0.000926831	4.60803	1	4.05e-14	3.86e-16	0.0156894	2.41606	557.886
1687	FBgn0015575_alpha-Est7	0.641121	0.156918	0.926929	0.224875	0.367437	0.290325	0.640897	0.641121	0.449165	0.0635863	0.156918	1.54993	0.926929	0.539252	0.224875	1.71464	0.367437	1.02488	0.0906209	0.290325	1.05741	1.25151
1688	FBgn0015576_alpha-Est8	0.459166	0.0159854	0.991877	0.0222504	0.385344	0.167123	0.0921601	0.459166	0.792605	0.0664858	0.0159854	2.57599	0.991877	0.355843	0.0222504	2.80376	0.385344	0.975083	0.0591553	0.167123	1.38151	1.65502
1689	FBgn0015577_alpha-Est9	0.28126	0.134406	0.883192	0.23946	0.154018	0.33685	0.579385	0.28126	1.30664	0.0717202	0.134406	1.6182	0.883192	0.603658	0.23946	1.68612	0.154018	1.95448	0.0818506	0.33685	0.960407	1.34736
1690	FBgn0015582_dare	0.646619	0.308908	0.829732	0.47423	0.719903	0.645482	0.891053	0.646619	0.440449	0.11176	0.308908	1.24356	0.829732	0.66846	0.47423	1.3726	0.719903	0.331164	0.102739	0.645482	0.460047	1.09667
1691	FBgn0015583_Acp29AB	NA	NA	NA	NA	NA	NA	1	NA	NA	NA	NA	NA	NA	NA	NA	NA	NA	NA	NA	NA	NA	NA
1692	FBgn0015584_Acp53Ea	0.600444	0.834935	0.290413	0.45045	1	0.235844	0.80089	0.600444	0.516185	0.921	0.834935	0.662553	0.290413	1.27241	0.45045	1.39664	1	0	4.95e-17	0.235844	1.18544	2.86172
1693	FBgn0015585_Acp63F	0.12904	0.493672	0.423455	0.925408	1	0.723471	0.563496	0.12904	2.14831	1.29101	0.493672	1.01088	0.423455	1.09049	0.925408	1.04222	1	8.9e-15	2.24e-15	0.723471	-0.353823	0.858408
1694	FBgn0015586_Acp76A	NA	NA	NA	NA	NA	NA	1	NA	NA	NA	NA	NA	NA	NA	NA	NA	NA	NA	NA	NA	NA	NA
1695	FBgn0015589_Apc	0.852646	0.521318	0.699112	0.819757	0.946139	0.683242	0.98797	0.852646	0.160003	0.0425611	0.521318	0.981373	0.699112	0.803613	0.819757	1.1059	0.946139	0.0554371	0.0339175	0.683242	0.408044	1.11106
1696	FBgn0015591_AstA	0.480991	0.654205	0.473499	0.817088	0.243278	0.751094	0.812233	0.480991	0.744507	0.065728	0.654205	0.847669	0.473499	1.03299	0.817088	1.10758	0.243278	1.46106	0.0881729	0.751094	-0.317197	0.924662
1697	FBgn0015600_toc	0.187038	0.831544	0.14868	0.296731	0.161459	0.507642	0.619322	0.187038	1.74353	0.0643905	0.831544	0.66641	0.14868	1.57374	0.296731	1.58864	0.161459	1.90307	0.0638361	0.507642	-0.662513	0.873368
1698	FBgn0015602_BEAF-32	0.416168	0.171102	0.886318	0.277832	0.495888	0.111877	0.509274	0.416168	0.894784	0.0782587	0.171102	1.51163	0.886318	0.599505	0.277832	1.6186	0.495888	0.712971	0.0633366	0.111877	1.58981	1.36828
1699	FBgn0015609_CadN	0.0962975	0.597638	0.281905	0.659229	0.141888	0.570043	0.455306	0.0962975	2.47244	0.0890079	0.597638	0.903467	0.281905	1.28621	0.659229	1.21521	0.141888	2.04414	0.0833431	0.570043	-0.567989	0.956915
1700	FBgn0015614_CanB2	0.264285	0.057719	0.946351	0.101355	0.171808	0.0985444	0.300025	0.264285	1.37277	0.0694273	0.057719	1.9902	0.946351	0.503835	0.101355	2.07799	0.171808	1.83554	0.0798499	0.0985444	1.65195	1.45694
1701	FBgn0015615_SMC3	0.658161	0.216997	0.892931	0.318662	0.652885	0.46003	0.769549	0.658161	0.422401	0.0772756	0.216997	1.40554	0.892931	0.590537	0.318662	1.55611	0.652885	0.43061	0.0796869	0.46003	0.738797	1.16363
1702	FBgn0015618_Cdk8	0.269174	0.615647	0.418327	0.797749	0.238282	0.708105	0.804672	0.269174	1.35328	0.170221	0.615647	0.885598	0.418327	1.09664	0.797749	1.11987	0.238282	1.48322	0.171678	0.708105	-0.374402	0.904503
1703	FBgn0015621_Clp	0.522454	0.616006	0.528108	0.911074	0.665	0.818496	0.98814	0.522454	0.65912	0.156904	0.616006	0.885243	0.528108	0.974251	0.911074	1.05057	0.665	0.411864	0.11271	0.818496	-0.22948	0.941021
1704	FBgn0015622_Cnx99A	0.0497229	0.523542	0.259254	0.69881	0.0378574	0.618696	0.206701	0.0497229	3.22087	0.180057	0.523542	0.979035	0.259254	1.32478	0.69881	1.18648	0.0378574	3.53635	0.17887	0.618696	-0.4977	0.877016
1705	FBgn0015623_Cpr	0.331608	0.171728	0.866001	0.296285	0.438661	0.201719	0.677121	0.331608	1.13263	0.0637452	0.171728	1.51001	0.866001	0.625648	0.296285	1.58932	0.438661	0.840024	0.0613893	0.201719	1.27667	1.26094
1706	FBgn0015625_CycB3	0.838735	0.711782	0.50382	0.789247	0.945531	0.769294	0.985078	0.838735	0.176582	0.164917	0.711782	0.791116	0.50382	0.999946	0.789247	1.12534	0.945531	0.056082	0.0630078	0.769294	-0.293299	0.963222
1707	FBgn0015663_Dot	0.300118	0.0405224	0.966145	0.0675033	0.496432	0.0629099	0.219795	0.300118	1.2379	0.118359	0.0405224	2.14802	0.966145	0.458613	0.0675033	2.26679	0.496432	0.711838	0.0896483	0.0629099	1.85983	1.56788
1708	FBgn0015664_Dref	0.486122	0.198577	0.879663	0.312983	0.405775	0.161266	0.651867	0.486122	0.733531	0.0793097	0.198577	1.44533	0.879663	0.608285	0.312983	1.56432	0.405775	0.921143	0.0923645	0.161266	1.40083	1.21915
1709	FBgn0015714_Cyp6a17	0.756151	0.923788	0.181386	0.251913	0.7432	0.573461	0.699064	0.756151	0.281339	0.0548539	0.923788	0.544458	0.181386	1.48571	0.251913	1.66311	0.7432	0.298848	0.0530395	0.573461	-0.562961	0.783686
1710	FBgn0015721_ktub	0.405577	0.0265192	0.983996	0.0393276	0.499432	0.027399	0.148932	0.405577	0.921651	0.112755	0.0265192	2.34042	0.983996	0.399082	0.0393276	2.52372	0.499432	0.705615	0.107186	0.027399	2.20579	1.60285
1711	FBgn0015737_Hmu	0.162306	0.00871718	0.983303	0.0172937	0.151967	0.00972046	0.0511764	0.162306	1.89737	0.0811386	0.00871718	2.86828	0.983303	0.402084	0.0172937	2.93112	0.151967	1.96911	0.0916271	0.00972046	2.58562	1.82993
1712	FBgn0015754_Lis-1	0.124547	0.201632	0.725334	0.447355	0.141586	0.347868	0.549807	0.124547	2.18733	0.0609386	0.201632	1.4385	0.725334	0.777677	0.447355	1.39985	0.141586	2.04647	0.0565249	0.347868	0.938732	1.20251
1713	FBgn0015756_RpL9	0.757253	0.129526	0.950439	0.173974	0.787414	0.0856859	0.415785	0.757253	0.279863	0.0842695	0.129526	1.63447	0.950439	0.495463	0.173974	1.83111	0.787414	0.240334	0.0777935	0.0856859	1.71861	1.31253
1714	FBgn0015765_p38a	0.529986	0.528763	0.617692	0.910038	0.454515	0.665506	0.973655	0.529986	0.644371	0.0594063	0.528763	0.973566	0.617692	0.883576	0.910038	1.05117	0.454515	0.803162	0.0593086	0.665506	0.432324	1.18589
1715	FBgn0015766_Msr-110	0.999098	6.91e-06	1	5.76e-06	0.634473	0.00247847	3.45e-05	0.999098	0.000902447	0.00317664	6.91e-06	7.67399	1	0.0998144	5.76e-06	8.76986	0.634473	0.459808	0.0531663	0.00247847	3.02596	2.9642
1716	FBgn0015770_MstProx	0.692882	0.9492	0.123528	0.169537	1	0.0376818	0.205832	0.692882	0.370044	1.04205	0.9492	0.498041	0.123528	1.6553	0.169537	1.84285	1	0	3.81e-17	0.0376818	2.0783	4.02064
1717	FBgn0015772_Nak	0.215958	0.0882986	0.905538	0.167007	0.280339	0.109631	0.42573	0.215958	1.58862	0.0668089	0.0882986	1.80271	0.905538	0.572662	0.167007	1.84968	0.280339	1.31012	0.0537578	0.109631	1.59985	1.42398
1718	FBgn0015773_NetA	0.239227	0.148951	0.855617	0.278455	0.464727	0.37584	0.620049	0.239227	1.47899	0.199813	0.148951	1.57294	0.855617	0.638334	0.278455	1.61758	0.464727	0.780126	0.141517	0.37584	0.885587	1.31918
1719	FBgn0015774_NetB	0.727636	0.0574185	0.98101	0.0731734	0.674276	0.0668311	0.298685	0.727636	0.320317	0.0528915	0.0574185	1.99252	0.98101	0.411428	0.0731734	2.22905	0.674276	0.39775	0.0568861	0.0668311	1.83281	1.4004
1720	FBgn0015776_nrv1	0.966443	0.0812132	0.978932	0.097189	0.977315	0.155354	0.398427	0.966443	0.0341603	0.00916939	0.0812132	1.83948	0.978932	0.419249	0.097189	2.09734	0.977315	0.0229587	0.00694479	0.155354	1.42087	1.57556
1721	FBgn0015777_nrv2	0.728017	0.158831	0.93353	0.219941	0.700326	0.101779	0.47483	0.728017	0.319786	0.037696	0.158831	1.54458	0.93353	0.527894	0.219941	1.7247	0.700326	0.359177	0.0454956	0.101779	1.63629	1.24563
1722	FBgn0015778_rin	0.915526	0.023918	0.995202	0.0266586	0.991829	0.0304475	0.135196	0.915526	0.0884377	0.0287395	0.023918	2.38791	0.995202	0.327356	0.0266586	2.71376	0.991829	0.00820626	0.00893376	0.0304475	2.16422	1.70427
1723	FBgn0015781_P5cr	0.0747581	0.275538	0.566402	0.679989	0.0606174	0.768187	0.312844	0.0747581	2.75641	0.140157	0.275538	1.29677	0.566402	0.934846	0.679989	1.19997	0.0606174	2.99412	0.138752	0.768187	0.294747	1.13126
1724	FBgn0015789_Rab10	0.963653	0.177667	0.940096	0.230302	0.974341	0.287893	0.690766	0.963653	0.0370561	0.0159563	0.177667	1.49492	0.940096	0.515945	0.230302	1.70382	0.974341	0.0260091	0.0135378	0.287893	1.06276	1.20869
1725	FBgn0015790_Rab11	0.275443	0.0263733	0.975467	0.0445628	0.547336	0.135928	0.148166	0.275443	1.32882	0.0645422	0.0263733	2.34295	0.975467	0.431204	0.0445628	2.46359	0.547336	0.611219	0.0411047	0.135928	1.49113	1.55672
1726	FBgn0015791_Rab14	0.227319	4.44e-06	0.999964	7.08e-06	0.241243	2.74e-05	2.66e-05	0.227319	1.53363	0.105303	4.44e-06	8.08673	0.999964	0.171926	7.08e-06	8.56005	0.241243	1.47003	0.107218	2.74e-05	4.19373	2.82096
1727	FBgn0015793_Rab19	0.112457	0.085279	0.856156	0.194585	0.159242	0.154606	0.414223	0.112457	2.30009	0.0929703	0.085279	1.818	0.856156	0.637686	0.194585	1.78028	0.159242	1.91812	0.0798854	0.154606	1.42345	1.46264
1728	FBgn0015794_Rab18	0.712068	0.0416358	0.986721	0.0523162	0.692215	0.0122344	0.0711973	0.712068	0.342278	0.101749	0.0416358	2.13585	0.986721	0.386326	0.0523162	2.38705	0.692215	0.371024	0.0885823	0.0122344	2.50531	1.602
1729	FBgn0015795_Rab7	0.289088	0.00735752	0.992887	0.0118014	0.411947	0.0825664	0.0433411	0.289088	1.27754	0.0814553	0.00735752	2.95223	0.992887	0.348284	0.0118014	3.12865	0.411947	0.905406	0.0617854	0.0825664	1.73599	1.60381
1730	FBgn0015797_Rab6	0.697217	0.600971	0.592011	0.990935	0.561945	0.315474	0.897118	0.697217	0.3637	0.0438189	0.600971	0.90015	0.592011	0.90908	0.990935	1.00503	0.561945	0.584146	0.0537549	0.315474	-1.0038	0.881451
1731	FBgn0015799_Rbf	0.953257	0.206263	0.925818	0.273033	0.991008	0.170883	0.67514	0.953257	0.0479243	0.0360153	0.206263	1.42833	0.925818	0.541107	0.273033	1.62652	0.991008	0.00903416	0.0230715	0.170883	1.36937	1.23721
1732	FBgn0015801_Reg-5	0.857562	0.248011	0.89592	0.345499	0.929636	0.227791	0.787965	0.857562	0.154212	0.0504247	0.248011	1.34504	0.89592	0.586398	0.345499	1.51912	0.929636	0.0730856	0.0479829	0.227791	1.20607	1.11365
1733	FBgn0015803_RtGEF	0.374129	0.0376522	0.974932	0.0582023	0.271799	0.143015	0.205686	0.374129	1.00598	0.0725073	0.0376522	2.18108	0.974932	0.432947	0.0582023	2.33655	0.271799	1.34297	0.0897824	0.143015	1.46466	1.76884
1734	FBgn0015805_HDAC1	0.782022	0.51519	0.691392	0.821579	0.880206	0.935391	0.987015	0.782022	0.247283	0.0646178	0.51519	0.98784	0.691392	0.811206	0.821579	1.10475	0.880206	0.127979	0.0531949	0.935391	0.0810647	1.01146
1735	FBgn0015808_ScpX	0.708619	0.0263692	0.992189	0.0323039	0.537118	0.029219	0.148145	0.708619	0.347211	0.0783799	0.0263692	2.34303	0.992189	0.353585	0.0323039	2.6193	0.537118	0.630609	0.0769685	0.029219	2.18052	1.58231
1736	FBgn0015818_Spx	0.802848	0.707282	0.501502	0.791579	0.748678	0.694344	0.984655	0.802848	0.220714	0.0440379	0.707282	0.79556	0.501502	1.00243	0.791579	1.12383	0.748678	0.291404	0.051244	0.694344	-0.392967	0.895652
1737	FBgn0015828_TfIIEalpha	0.284408	0.423314	0.61945	0.799317	0.284151	0.959964	0.865437	0.284408	1.29484	0.133446	0.423314	1.09066	0.61945	0.88184	0.799317	1.11886	0.284151	1.2958	0.140657	0.959964	-0.0501993	0.994601
1738	FBgn0015829_TfIIEbeta	0.730093	0.222945	0.897643	0.319614	0.892038	0.218542	0.772263	0.730093	0.316896	0.070428	0.222945	1.39335	0.897643	0.583985	0.319614	1.55475	0.892038	0.11455	0.0438756	0.218542	1.23041	1.23254
1739	FBgn0015831_Rtnl2	0.704526	0.204205	0.905986	0.292682	1	0.940774	0.746016	0.704526	0.353098	0.402784	0.204205	1.43282	0.905986	0.572006	0.292682	1.5949	1	9.72e-14	1.15e-13	0.940774	-0.074297	0.965711
1740	FBgn0015834_eIF3i	0.823584	0.101971	0.966319	0.130761	0.849397	0.040157	0.21801	0.823584	0.194968	0.092968	0.101971	1.7395	0.966319	0.458148	0.130761	1.96115	0.849397	0.16385	0.0809863	0.040157	2.05213	1.27179
1741	FBgn0015838_Vang	0.138499	0.12056	0.83187	0.259929	0.330449	0.500621	0.537366	0.138499	2.07063	0.0897441	0.12056	1.66599	0.83187	0.666041	0.259929	1.64888	0.330449	1.13631	0.0695376	0.500621	0.673512	1.17357
1742	FBgn0015872_Drip	0.26713	0.268691	0.756569	0.501138	0.30352	0.349755	0.845061	0.26713	1.36138	0.0866538	0.268691	1.30837	0.756569	0.746291	0.501138	1.34668	0.30352	1.22599	0.0763989	0.349755	0.935064	1.194
1743	FBgn0015903_apt	0.26495	0.17158	0.844667	0.313995	0.243906	0.2395	0.676775	0.26495	1.3701	0.0834192	0.17158	1.51039	0.844667	0.651314	0.313995	1.56285	0.243906	1.4583	0.0831821	0.2395	1.17624	1.38139
1744	FBgn0015904_ara	0.391209	0.0462879	0.970434	0.071157	0.715982	0.450545	0.247505	0.391209	0.9593	0.198076	0.0462879	2.08842	0.970434	0.446711	0.071157	2.24211	0.715982	0.33671	0.1148	0.450545	0.754506	1.22127
1745	FBgn0015905_ast	0.946233	0.287571	0.881436	0.398842	0.826759	0.539086	0.869248	0.946233	0.0553379	0.0228278	0.287571	1.27698	0.881436	0.605968	0.398842	1.45309	0.826759	0.191087	0.0423383	0.539086	0.614196	1.21659
1746	FBgn0015919_caup	0.151536	0.0230437	0.960546	0.0474342	0.123921	0.0861574	0.130538	0.151536	1.97221	0.145363	0.0230437	2.4051	0.960546	0.472778	0.0474342	2.43371	0.123921	2.19287	0.155412	0.0861574	1.71603	1.59409
1747	FBgn0015924_crq	0.273242	0.0298507	0.972205	0.0507651	0.476596	0.105367	0.166258	0.273242	1.33734	0.0716669	0.0298507	2.28632	0.972205	0.441468	0.0507651	2.40136	0.476596	0.754007	0.0514353	0.105367	1.61937	1.57693
1748	FBgn0015925_csul	0.590705	0.375094	0.768719	0.60233	0.451466	0.404995	0.940449	0.590705	0.532936	0.0646071	0.375094	1.15069	0.768719	0.733869	0.60233	1.25908	0.451466	0.810145	0.0699255	0.404995	0.832733	1.12976
1749	FBgn0015926_dah	0.237581	0.488544	0.526476	0.960925	0.66398	0.815789	0.803591	0.237581	1.48637	0.951734	0.488544	1.01645	0.526476	0.975959	0.960925	1.02187	0.66398	0.413428	0.367092	0.815789	0.232964	1.10088
1750	FBgn0015929_dpa	0.57196	0.354504	0.78091	0.569268	0.658024	0.994162	0.927663	0.57196	0.566009	0.143805	0.354504	1.17808	0.78091	0.721246	0.569268	1.2862	0.658024	0.422613	0.134898	0.994162	-0.00731752	0.98993
1751	FBgn0015946_grim	0.380806	0.00666521	0.995601	0.00963331	0.413895	0.0954095	0.0393308	0.380806	0.987469	0.201624	0.00666521	3.00163	0.995601	0.323012	0.00963331	3.23589	0.413895	0.90049	0.175248	0.0954095	1.66753	1.71074
1752	FBgn0015949_hrg	0.0625529	0.0383691	0.883533	0.105011	0.0416334	0.063907	0.20923	0.0625529	2.95834	0.0992892	0.0383691	2.17258	0.883533	0.603208	0.105011	2.06168	0.0416334	3.42588	0.09809	0.063907	1.85283	1.42306
1753	FBgn0016013_Faa	0.0130228	0.0262503	0.773232	0.118221	0.00641301	0.137754	0.0378664	0.0130228	4.81035	0.168064	0.0262503	2.3451	0.773232	0.729215	0.118221	2.00728	0.00641301	5.69165	0.1641	0.137754	1.48421	1.56683
1754	FBgn0016031_lama	0.204706	0.000203262	0.999351	0.000351359	0.0729225	0.0344998	0.00121895	0.204706	1.64616	0.0877001	0.000203262	5.0237	0.999351	0.246016	0.000351359	5.26193	0.0729225	2.78447	0.091136	0.0344998	2.11418	2.11974
1755	FBgn0016032_lbm	0.896072	0.0819371	0.976758	0.10047	0.817845	0.187094	0.401265	0.896072	0.110015	0.0227662	0.0819371	1.83557	0.976758	0.426891	0.10047	2.08203	0.817845	0.202025	0.0333506	0.187094	1.31923	1.61497
1756	FBgn0016034_mael	0.248776	0.00802724	0.990642	0.0136289	0.19984	0.00492054	0.0291625	0.248776	1.4372	0.198004	0.00802724	2.90898	0.990642	0.364195	0.0136289	3.05358	0.19984	1.67207	0.223761	0.00492054	2.81219	1.77
1757	FBgn0016036_mei-P22	0.415785	0.82352	0.252649	0.422484	0.528793	0.732868	0.82576	0.415785	0.895743	0.437155	0.82352	0.675428	0.252649	1.33659	0.422484	1.42644	0.528793	0.646693	0.300286	0.732868	-0.341313	0.903404
1758	FBgn0016038_Vsp37A	0.198281	0.480527	0.505137	0.974453	0.127218	0.684086	0.557989	0.198281	1.68051	0.0767475	0.480527	1.02522	0.505137	0.998537	0.974453	1.01424	0.127218	2.16395	0.0851324	0.684086	-0.406894	0.907937
1759	FBgn0016041_Tom40	0.485863	0.00802628	0.996328	0.0106671	0.452165	0.0193705	0.0472016	0.485863	0.734081	0.0526755	0.00802628	2.90904	0.996328	0.314264	0.0106671	3.18183	0.452165	0.808541	0.0541169	0.0193705	2.33832	1.9542
1760	FBgn0016047_nompA	0.737567	0.846342	0.305241	0.45351	0.760317	0.367704	0.887538	0.737567	0.306564	0.0665673	0.846342	0.649353	0.305241	1.24916	0.45351	1.39348	0.760317	0.275774	0.0764953	0.367704	-0.900782	0.842437
1761	FBgn0016053_pgc	0.0567135	0.343797	0.448427	0.881708	0.0576014	0.964689	0.295531	0.0567135	3.07008	1.20111	0.343797	1.19282	0.448427	1.06128	0.881708	1.06794	0.0576014	3.05233	0.749479	0.964689	0.0442697	1.04047
1762	FBgn0016054_phr6-4	0.0446675	0.0601919	0.807428	0.180124	0.0496231	0.0560631	0.239801	0.0446675	3.34446	0.408008	0.0601919	1.97161	0.807428	0.693097	0.180124	1.81533	0.0496231	3.22318	0.449348	0.0560631	1.91055	1.31643
1763	FBgn0016059_Sema1b	0.926304	0.0818678	0.977645	0.0993465	0.954031	0.0504907	0.267184	0.926304	0.0766891	0.0124691	0.0818678	1.83594	0.977645	0.423836	0.0993465	2.08721	0.954031	0.0471111	0.00777853	0.0504907	1.95578	1.72186
1764	FBgn0016061_side	0.293276	0.0164636	0.985302	0.0268487	0.550624	0.0480546	0.0948042	0.293276	1.26231	0.0701948	0.0164636	2.56207	0.985302	0.393177	0.0268487	2.71025	0.550624	0.60506	0.0440387	0.0480546	1.97689	1.70851
1765	FBgn0016070_smg	0.330441	0.224153	0.821745	0.39324	0.202643	0.623463	0.74301	0.330441	1.13634	0.0576536	0.224153	1.39091	0.821745	0.677402	0.39324	1.45962	0.202643	1.65706	0.0779008	0.623463	0.490948	1.1884
1766	FBgn0016075_vkg	0.750801	0.0604176	0.980529	0.0764983	0.706992	0.124592	0.311967	0.750801	0.288533	0.080718	0.0604176	1.96996	0.980529	0.413288	0.0764983	2.20832	0.706992	0.349547	0.0745127	0.124592	1.53578	1.46156
1767	FBgn0016076_vri	0.0335058	0.184019	0.561825	0.55596	0.0865611	0.565288	0.184929	0.0335058	3.67894	0.132966	0.184019	1.4793	0.561825	0.939496	0.55596	1.29749	0.0865611	2.59158	0.12958	0.565288	0.575005	1.18199
1768	FBgn0016078_wun	0.60579	0.279708	0.843506	0.431091	0.7971	0.816735	0.860346	0.60579	0.50711	0.046244	0.279708	1.28983	0.843506	0.65267	0.431091	1.41708	0.7971	0.227975	0.0289754	0.816735	0.231746	1.06459
1769	FBgn0016080_xmas-1	0.620762	0.31225	0.822782	0.484611	0.615809	0.591504	0.894176	0.620762	0.482133	0.125116	0.31225	1.2385	0.822782	0.676249	0.484611	1.36245	0.615809	0.490326	0.100644	0.591504	0.536658	1.12417
1770	FBgn0016081_fry	0.986828	0.284851	0.886676	0.390432	0.875683	0.453515	0.866224	0.986828	0.0132641	0.0130377	0.284851	1.28139	0.886676	0.599026	0.390432	1.46292	0.875683	0.133161	0.035999	0.453515	0.749568	1.10275
1771	FBgn0016119_ATPsynCF6	0.882588	0.148227	0.948997	0.193047	0.890812	0.0173228	0.0995385	0.882588	0.12526	0.0678206	0.148227	1.57509	0.948997	0.49846	0.193047	1.78388	0.890812	0.115933	0.0591278	0.0173228	2.37978	1.44836
1772	FBgn0016120_ATPsynD	0.825725	0.0727504	0.97806	0.0906293	0.933572	0.0868475	0.364406	0.825725	0.192349	0.140058	0.0727504	1.88792	0.97806	0.422375	0.0906293	2.12962	0.933572	0.0688475	0.0793932	0.0868475	1.71227	1.53217
1773	FBgn0016122_Acer	0.754965	0.188059	0.92005	0.262289	0.84032	0.288714	0.713484	0.754965	0.282929	0.0658977	0.188059	1.46963	0.92005	0.550504	0.262289	1.64477	0.84032	0.174678	0.0470624	0.288714	1.06095	1.27301
1774	FBgn0016123_Alp4	0.944935	0.100537	0.971432	0.123512	0.927047	0.0852956	0.414287	0.944935	0.0567143	0.0446397	0.100537	1.74572	0.971432	0.443782	0.123512	1.98722	0.927047	0.0758847	0.0421122	0.0852956	1.72075	1.35187
1775	FBgn0016126_CaMKI	0.668579	0.0391045	0.986654	0.0499828	0.769016	0.103519	0.212851	0.668579	0.406393	0.0783328	0.0391045	2.16404	0.986654	0.386664	0.0499828	2.40875	0.769016	0.264255	0.0565751	0.103519	1.62803	1.53484
1776	FBgn0016131_Cdk4	0.0466969	0.905952	0.020544	0.0624227	0.0232826	0.164583	0.117104	0.0466969	3.29317	0.150535	0.905952	0.572056	0.020544	2.45836	0.0624227	2.30354	0.0232826	4.10887	0.17716	0.164583	-1.38982	0.644038
1777	FBgn0016641_PTP-ER	0.745699	0.216564	0.903047	0.30775	0.793606	0.153521	0.632127	0.745699	0.295444	0.0610868	0.216564	1.40644	0.903047	0.576284	0.30775	1.57201	0.793606	0.232416	0.0564587	0.153521	1.42721	1.20541
1778	FBgn0016650_Lgr1	0.147975	0.143538	0.812288	0.304532	0.0856845	0.351228	0.41578	0.147975	1.99819	0.0748744	0.143538	1.58926	0.812288	0.687814	0.304532	1.57681	0.0856845	2.60299	0.0708442	0.351228	0.932211	1.39036
1779	FBgn0016660_H15	0.724077	0.706609	0.484486	0.775277	0.604914	0.681925	0.981231	0.724077	0.325293	0.0829689	0.706609	0.796224	0.484486	1.02088	0.775277	1.13443	0.604914	0.508591	0.0881952	0.681925	0.409837	1.22615
1780	FBgn0016672_Ipp	0.574017	0.0588029	0.974479	0.0809719	0.656649	0.0194059	0.110931	0.574017	0.562325	0.138154	0.0588029	1.98196	0.974479	0.434406	0.0809719	2.18187	0.656649	0.424747	0.124799	0.0194059	2.33764	1.4941
1781	FBgn0016675_Lectin-galC1	0.419344	0.00061891	0.99961	0.000811691	0.452543	0.0679708	0.00370772	0.419344	0.886868	0.409161	0.00061891	4.31295	0.99961	0.230183	0.000811691	4.6942	0.452543	0.807675	0.339536	0.0679708	1.8252	1.97824
1782	FBgn0016684_NaPi-T	0.303721	0.252577	0.787285	0.455547	0.281242	0.683427	0.82566	0.303721	1.22529	0.258549	0.252577	1.33672	0.787285	0.714573	0.455547	1.39139	0.281242	1.30671	0.266273	0.683427	0.407791	1.14138
1783	FBgn0016685_Nlp	0.543383	0.0310444	0.986706	0.0419995	0.694026	0.0309913	0.172122	0.543383	0.618675	0.0826949	0.0310444	2.26846	0.986706	0.3864	0.0419995	2.49204	0.694026	0.368367	0.0708166	0.0309913	2.15718	1.63047
1784	FBgn0016687_Nurf-38	0.810294	0.0497352	0.985999	0.0605978	0.804335	0.0381192	0.207996	0.810294	0.211391	0.0706511	0.0497352	2.05637	0.985999	0.389874	0.0605978	2.31752	0.804335	0.218845	0.0898667	0.0381192	2.07357	1.48427
1785	FBgn0016691_ATPsynO	0.726299	0.00986927	0.997583	0.0114091	0.806434	0.00794733	0.0467466	0.726299	0.322184	0.083079	0.00986927	2.80747	0.997583	0.295375	0.0114091	3.1464	0.806434	0.216213	0.0860244	0.00794733	2.6543	1.93637
1786	FBgn0016693_Past1	0.00204859	0.00309948	0.771958	0.0296787	0.010517	0.153407	0.0122288	0.00204859	7.17392	0.0870605	0.00309948	3.39706	0.771958	0.730531	0.0296787	2.66084	0.010517	5.07318	0.0690997	0.153407	1.4276	1.55371
1787	FBgn0016694_Pdp1	0.586126	0.0035231	0.998867	0.00424093	0.64809	0.00684913	0.0209533	0.586126	0.540912	0.0976797	0.0035231	3.32926	0.998867	0.265308	0.00424093	3.68695	0.64809	0.43813	0.0814046	0.00684913	2.70409	2.40143
1788	FBgn0016696_Pitslre	0.475036	0.642194	0.484342	0.840193	0.415326	0.491736	0.960053	0.475036	0.757401	0.0727157	0.642194	0.859453	0.484342	1.02104	0.840193	1.09316	0.415326	0.896894	0.0766987	0.491736	-0.687551	0.872625
1789	FBgn0016697_Prosalpha5	0.104356	0.519179	0.366095	0.835205	0.171168	0.979506	0.483806	0.104356	2.383	0.0998309	0.519179	0.983626	0.366095	1.16252	0.835205	1.09625	0.171168	1.83959	0.101596	0.979506	-0.0256882	0.996354
1790	FBgn0016698_Ptpa	0.727635	0.297861	0.849906	0.442564	0.6935	0.207922	0.753051	0.727635	0.320319	0.0849994	0.297861	1.26061	0.849906	0.645151	0.442564	1.40486	0.6935	0.369137	0.101981	0.207922	1.2593	1.17648
1791	FBgn0016701_Rab4	0.430477	0.2665	0.816355	0.44388	0.499813	0.445337	0.84426	0.430477	0.859602	0.0580612	0.2665	1.31213	0.816355	0.683359	0.44388	1.40348	0.499813	0.704829	0.0559181	0.445337	0.763212	1.28229
1792	FBgn0016715_Reg-2	0.585643	0.13821	0.932272	0.200962	0.461387	0.117268	0.526879	0.585643	0.541757	0.156188	0.13821	1.60592	0.932272	0.530105	0.200962	1.76565	0.461387	0.787602	0.188862	0.117268	1.56634	1.31742
1793	FBgn0016726_RpL29	0.847118	0.236027	0.90174	0.327776	0.805903	0.0234152	0.132519	0.847118	0.166557	0.103494	0.236027	1.36756	0.90174	0.578166	0.327776	1.54322	0.805903	0.216879	0.102915	0.0234152	2.26659	1.26124
1794	FBgn0016754_sba	0.763655	0.0499884	0.984841	0.0621202	0.912932	0.0659091	0.264854	0.763655	0.271337	0.0685871	0.0499884	2.05411	0.984841	0.395305	0.0621202	2.30583	0.912932	0.0912875	0.0335779	0.0659091	1.83904	1.36498
1795	FBgn0016756_Usp47	0.846585	0.616037	0.609161	0.993028	0.787501	0.684234	0.996436	0.846585	0.167191	0.0417445	0.616037	0.885212	0.609161	0.892018	0.993028	1.00387	0.787501	0.240222	0.0514666	0.684234	-0.406692	0.957501
1796	FBgn0016762_angel	0.549953	0.0760611	0.964194	0.107893	0.608218	0.0265948	0.149328	0.549953	0.606313	0.169138	0.0760611	1.86831	0.964194	0.463707	0.107893	2.04923	0.608218	0.503016	0.155524	0.0265948	2.21741	1.43251
1797	FBgn0016794_dos	0.568653	0.0109556	0.99599	0.0139107	0.574159	0.0114995	0.0639593	0.568653	0.57196	0.0607676	0.0109556	2.75671	0.99599	0.318475	0.0139107	3.04297	0.574159	0.56207	0.0595868	0.0114995	2.52714	1.75006
1798	FBgn0016797_fz2	0.98173	0.258696	0.900762	0.350139	0.842542	0.288755	0.83405	0.98173	0.018447	0.010029	0.258696	1.32577	0.900762	0.579565	0.350139	1.51301	0.842542	0.172016	0.0272082	0.288755	1.06086	1.40053
1799	FBgn0016917_Stat92E	0.785265	0.0531392	0.984217	0.0657155	0.870106	0.0712209	0.279363	0.785265	0.243098	0.0283702	0.0531392	2.0269	0.984217	0.39811	0.0657155	2.27938	0.870106	0.139592	0.0217827	0.0712209	1.80407	1.51583
1800	FBgn0016919_nompB	0.984256	0.411346	0.805764	0.599581	0.916491	0.831553	0.958393	0.984256	0.0158755	0.0124988	0.411346	1.10508	0.805764	0.694896	0.599581	1.26128	0.916491	0.0873803	0.0308607	0.831553	0.21271	1.06878
1801	FBgn0016920_nompC	0.318278	0.269063	0.778414	0.481787	0.404123	0.401401	0.847497	0.318278	1.17586	0.11591	0.269063	1.30773	0.778414	0.723844	0.481787	1.36519	0.404123	0.925398	0.117607	0.401401	0.839122	1.15511
1802	FBgn0016926_Pino	0.572125	0.116912	0.943282	0.168899	0.754833	0.323751	0.525732	0.572125	0.565712	0.0860208	0.116912	1.67948	0.943282	0.509873	0.168899	1.84456	0.754833	0.283107	0.063146	0.323751	0.986779	1.2347
1803	FBgn0016930_Dyrk2	0.0966069	0.0307583	0.927355	0.0735268	0.152943	0.0686026	0.170927	0.0966069	2.46886	0.117602	0.0307583	2.27267	0.927355	0.538538	0.0735268	2.2268	0.152943	1.96212	0.108341	0.0686026	1.82103	1.41914
1804	FBgn0016970_l(2)k10201	0.910211	0.21229	0.91974	0.285523	0.897588	0.332203	0.761111	0.910211	0.0942847	0.0407277	0.21229	1.4154	0.91974	0.551	0.285523	1.60617	0.897588	0.108316	0.0465008	0.332203	0.969687	1.27271
1805	FBgn0016974_swaPsi	0.564422	0.72292	0.423053	0.696892	0.58081	0.728756	0.963118	0.564422	0.579629	0.338744	0.72292	0.780077	0.423053	1.09097	0.696892	1.18784	0.58081	0.550255	0.372367	0.728756	-0.346781	0.88741
1806	FBgn0016975_stnB	0.346625	0.354512	0.713547	0.634928	0.730774	0.728723	0.922201	0.346625	1.08605	0.0622004	0.354512	1.17807	0.713547	0.78937	0.634928	1.23354	0.730774	0.31595	0.0312248	0.728723	0.346824	1.10692
1807	FBgn0016976_stnA	0.346625	0.354512	0.713547	0.634928	0.730774	0.728723	0.922201	0.346625	1.08605	0.0622004	0.354512	1.17807	0.713547	0.78937	0.634928	1.23354	0.730774	0.31595	0.0312248	0.728723	0.346824	1.10692
1808	FBgn0016977_spen	0.172621	0.539673	0.423827	0.878963	0.160565	0.69304	0.650118	0.172621	1.83042	0.0820165	0.539673	0.962221	0.423827	1.09005	0.878963	1.06958	0.160565	1.90911	0.0814258	0.69304	-0.394732	0.914485
1809	FBgn0016978_snRNP-U1-70K	0.0295174	0.00186802	0.966388	0.00695992	0.0448563	0.0336283	0.0111559	0.0295174	3.82781	0.140661	0.00186802	3.6719	0.966388	0.457967	0.00695992	3.41112	0.0448563	3.33959	0.122145	0.0336283	2.1245	1.80077
1810	FBgn0016983_smid	0.668892	0.486305	0.69318	0.790799	0.681368	0.680486	0.981625	0.668892	0.405918	0.0650061	0.486305	1.01889	0.69318	0.809449	0.790799	1.12434	0.681368	0.387096	0.0620289	0.680486	-0.4118	0.960764
1811	FBgn0016984_sktl	0.648668	0.630598	0.549418	0.917898	0.571331	0.487867	0.981957	0.648668	0.437221	0.0471244	0.630598	0.870851	0.549418	0.952176	0.917898	1.04658	0.571331	0.567138	0.0563432	0.487867	-0.693706	0.920474
1812	FBgn0017414_cag	0.333308	0.522591	0.547974	0.974135	0.196232	0.803778	0.73036	0.333308	1.12725	0.0887878	0.522591	0.980034	0.547974	0.95366	0.974135	1.01442	0.196232	1.69172	0.0968268	0.803778	0.248461	1.02769
1813	FBgn0017418_ari-1	0.300855	0.0116899	0.989655	0.0187091	0.430881	0.0426711	0.0681213	0.300855	1.23531	0.0661352	0.0116899	2.72535	0.989655	0.370314	0.0187091	2.89112	0.430881	0.858625	0.0575699	0.0426711	2.02691	1.68437
1814	FBgn0017424_CR11538	0.893838	0.00518402	0.999219	0.00539026	0.169341	0.884283	0.0307038	0.893838	0.112524	0.317234	0.00518402	3.12889	0.999219	0.252205	0.00539026	3.55206	0.169341	1.85124	0.498439	0.884283	-0.145542	0.834236
1815	FBgn0017429_CG5989	0.969527	0.174613	0.941819	0.225505	0.963722	0.0757297	0.376561	0.969527	0.0309689	0.0260775	0.174613	1.50262	0.941819	0.512685	0.225505	1.71337	0.963722	0.0369837	0.0334006	0.0757297	1.77602	1.32861
1816	FBgn0017430_Nelf-E	0.841357	0.715099	0.500472	0.782487	0.840832	0.958781	0.984463	0.841357	0.173436	0.046587	0.715099	0.787834	0.500472	1.00354	0.782487	1.12972	0.840832	0.174065	0.0462802	0.958781	0.0516828	1.00666
1817	FBgn0017448_CG2187	0.898663	0.244707	0.901494	0.336241	0.958398	0.783551	0.81435	0.898663	0.107113	0.168162	0.244707	1.35115	0.901494	0.578518	0.336241	1.53156	0.958398	0.042534	0.111462	0.783551	0.274694	1.0874
1818	FBgn0017456_Ubc84D	0.296911	0.0438931	0.963023	0.0735824	0.198584	0.0289498	0.161602	0.296911	1.24927	0.212561	0.0438931	2.11219	0.963023	0.46668	0.0735824	2.22645	0.198584	1.67887	0.292968	0.0289498	2.18417	1.49034
1819	FBgn0017457_U2af38	0.238513	0.545718	0.469837	0.921849	0.251937	0.962403	0.805027	0.238513	1.48219	0.0950087	0.545718	0.955981	0.469837	1.03706	0.921849	1.04428	0.251937	1.42373	0.096379	0.962403	-0.0471386	0.979762
1820	FBgn0017482_T3dh	0.375658	0.0119987	0.992047	0.0177518	0.361148	0.0253026	0.0698668	0.375658	1.00171	0.113699	0.0119987	2.71279	0.992047	0.354623	0.0177518	2.9178	0.361148	1.04297	0.118058	0.0253026	2.23675	1.65753
1821	FBgn0017545_RpS3A	0.167936	0.00173316	0.995497	0.00332556	0.269689	0.0303595	0.010354	0.167936	1.86029	0.126355	0.00173316	3.71354	0.995497	0.324168	0.00332556	3.82644	0.269689	1.35125	0.0957758	0.0303595	2.16537	1.97827
1822	FBgn0017550_Rga	0.764216	0.369767	0.805084	0.559846	0.637387	0.751392	0.937338	0.764216	0.270593	0.0400191	0.369767	1.15766	0.805084	0.69563	0.559846	1.29417	0.637387	0.455129	0.0426303	0.751392	0.316804	1.09185
1823	FBgn0017551_Rca1	0.79368	0.191157	0.921689	0.263492	0.689487	0.29331	0.719982	0.79368	0.232321	0.0934069	0.191157	1.46234	0.921689	0.547873	0.263492	1.64269	0.689487	0.375041	0.0929492	0.29331	1.05089	1.20252
1824	FBgn0017556_Prosalpha4T2	0.374283	0.938189	0.0900864	0.145028	0.205946	0.626337	0.432454	0.374283	1.00555	0.636042	0.938189	0.519489	0.0900864	1.7939	0.145028	1.91389	0.205946	1.63965	0.533608	0.626337	-0.486889	0.749809
1825	FBgn0017558_Pdk	0.927633	0.221327	0.916369	0.297732	0.911564	0.15062	0.624499	0.927633	0.075251	0.0249218	0.221327	1.39664	0.916369	0.556312	0.297732	1.5871	0.911564	0.0927935	0.0280458	0.15062	1.43734	1.37606
1826	FBgn0017561_Ork1	0.167206	0.365529	0.593626	0.761494	0.167222	0.595437	0.666399	0.167206	1.86503	0.102807	0.365529	1.16327	0.593626	0.907467	0.761494	1.14351	0.167222	1.86492	0.0961902	0.595437	0.530974	1.0661
1827	FBgn0017566_ND-75	0.799484	0.0656655	0.979955	0.0819925	0.835621	0.056023	0.292432	0.799484	0.224958	0.158609	0.0656655	1.93312	0.979955	0.415467	0.0819925	2.17605	0.835621	0.180332	0.107329	0.056023	1.91086	1.42821
1828	FBgn0017567_ND-23	0.777993	0.00452643	0.999126	0.00493414	0.732593	0.00100553	0.00601805	0.777993	0.252509	0.0965351	0.00452643	3.19859	0.999126	0.256085	0.00493414	3.60149	0.732593	0.313428	0.115362	0.00100553	3.28897	1.98501
1829	FBgn0017572_Mo25	0.95906	0.571902	0.671906	0.898381	0.919936	0.924036	0.993845	0.95906	0.0418428	0.00938475	0.571902	0.929279	0.671906	0.830323	0.898381	1.05803	0.919936	0.0836128	0.014246	0.924036	0.095351	1.01625
1830	FBgn0017577_Mcm5	0.469206	0.0286073	0.985442	0.0405119	0.597117	0.533807	0.159826	0.469206	0.770188	0.285678	0.0286073	2.30573	0.985442	0.392524	0.0405119	2.5094	0.597117	0.521876	0.2062	0.533807	0.622205	1.1765
1831	FBgn0017578_Max	0.222378	0.44205	0.562007	0.876124	0.14639	0.544892	0.613138	0.222378	1.55718	0.0890878	0.44205	1.06864	0.562007	0.93931	0.876124	1.07128	0.14639	2.00996	0.103245	0.544892	-0.605432	0.921262
1832	FBgn0017579_RpL14	0.540175	0.149474	0.920448	0.223746	0.798659	0.295834	0.621449	0.540175	0.624768	0.189747	0.149474	1.57139	0.920448	0.549869	0.223746	1.71692	0.798659	0.226001	0.138297	0.295834	1.04541	1.46086
1833	FBgn0017581_Lk6	0.639855	0.22695	0.884284	0.337301	0.471711	0.156445	0.639687	0.639855	0.451183	0.0431669	0.22695	1.38531	0.884284	0.602213	0.337301	1.53012	0.471711	0.764672	0.0574793	0.156445	1.41713	1.48003
1834	FBgn0017590_klg	0.644564	0.00121916	0.999697	0.00136791	0.75426	0.0129784	0.0072927	0.644564	0.443697	0.0625228	0.00121916	3.91251	0.999697	0.222849	0.00136791	4.3608	0.75426	0.283876	0.0503386	0.0129784	2.48436	2.1504
1835	FBgn0019624_COX5A	0.39221	0.214565	0.8476	0.35954	0.492505	0.208112	0.753406	0.39221	0.956629	0.140233	0.214565	1.41061	0.8476	0.647875	0.35954	1.50085	0.492505	0.720046	0.149767	0.208112	1.25877	1.30411
1836	FBgn0019637_Atu	0.953585	0.540485	0.699268	0.838695	0.898513	0.749137	0.990585	0.953585	0.0475795	0.0415111	0.540485	0.961381	0.699268	0.80346	0.838695	1.09409	0.898513	0.107281	0.0690075	0.749137	0.319777	1.07003
1837	FBgn0019643_Dat	0.0554683	0.00849914	0.953143	0.0246769	0.0186941	0.085824	0.0499235	0.0554683	3.09546	0.129722	0.00849914	2.88076	0.953143	0.489694	0.0246769	2.75209	0.0186941	4.37166	0.1501	0.085824	1.71785	1.78397
1838	FBgn0019644_ATPsynB	0.787826	0.00314399	0.999438	0.00336316	0.755426	0.00133997	0.00801296	0.787826	0.239806	0.105193	0.00314399	3.38948	0.999438	0.241376	0.00336316	3.81993	0.755426	0.282311	0.13882	0.00133997	3.20728	1.94347
1839	FBgn0019650_toy	0.424177	9.68e-05	0.999929	0.000122106	0.38567	0.00362023	0.000580861	0.424177	0.874939	0.0589166	9.68e-05	5.53737	0.999929	0.186325	0.000122106	6.04186	0.38567	0.974199	0.0592059	0.00362023	2.90949	2.38732
1840	FBgn0019660_roX2	0.302479	0.0400195	0.966813	0.0664666	0.238915	0.367192	0.217338	0.302479	1.22962	0.468215	0.0400195	2.15363	0.966813	0.456825	0.0664666	2.27405	0.238915	1.48039	0.457639	0.367192	0.901746	1.19129
1841	FBgn0019661_roX1	0.76061	0.00657454	0.9986	0.00733979	0.410343	0.0286975	0.0388045	0.76061	0.275383	0.0662906	0.00657454	3.00851	0.9986	0.273231	0.00733979	3.38216	0.410343	0.909471	0.102609	0.0286975	2.18762	1.8202
1842	FBgn0019662_qm	0.0322526	0.0721833	0.74576	0.234906	0.0567798	0.17734	0.178567	0.0322526	3.72363	0.100804	0.0721833	1.89137	0.74576	0.757231	0.234906	1.69484	0.0567798	3.06874	0.100187	0.17734	1.34899	1.23387
1843	FBgn0019686_lok	0.413505	0.0263326	0.984471	0.0387838	0.551087	0.0615254	0.147953	0.413505	0.901473	0.107968	0.0263326	2.34366	0.984471	0.396976	0.0387838	2.53044	0.551087	0.604196	0.0983055	0.0615254	1.8697	1.7887
1844	FBgn0019809_gcm2	0.974252	0.901116	0.256933	0.348098	0.990703	0.470122	0.831668	0.974252	0.0261006	0.0769352	0.901116	0.579059	0.256933	1.3289	0.348098	1.51569	0.990703	0.00934231	0.0281924	0.470122	-0.72228	0.815788
1845	FBgn0019828_dj	NA	NA	NA	NA	NA	NA	1	NA	NA	NA	NA	NA	NA	NA	NA	NA	NA	NA	NA	NA	NA	NA
1846	FBgn0019830_colt	0.668603	0.61174	0.574075	0.961902	0.68694	0.95976	0.99403	0.668603	0.406357	0.0682685	0.61174	0.889464	0.574075	0.927084	0.961902	1.02132	0.68694	0.378807	0.0794141	0.95976	0.0504553	1.01508
1847	FBgn0019890_Smg5	0.283609	0.149439	0.870787	0.266915	0.308659	0.097809	0.460749	0.283609	1.29782	0.0849921	0.149439	1.57149	0.870787	0.619659	0.266915	1.63682	0.308659	1.20825	0.0824283	0.097809	1.65557	1.21818
1848	FBgn0019925_Surf4	0.577344	0.000969499	0.999696	0.00112961	0.331764	0.0131648	0.00580292	0.577344	0.556395	0.0463527	0.000969499	4.04528	0.999696	0.222952	0.00112961	4.48133	0.331764	1.13213	0.0590505	0.0131648	2.47928	2.12415
1849	FBgn0019928_Ser8	NA	NA	NA	NA	NA	NA	1	NA	NA	NA	NA	NA	NA	NA	NA	NA	NA	NA	NA	NA	NA	NA
1850	FBgn0019929_Ser7	0.782434	0.0186694	0.99549	0.0216802	0.710239	0.331942	0.106916	0.782434	0.24675	0.0688402	0.0186694	2.50301	0.99549	0.324246	0.0216802	2.81678	0.710239	0.34489	0.0702254	0.331942	0.970211	1.45748
1851	FBgn0019932_SamDC	0.453265	0.297227	0.797779	0.493832	0.532316	0.290172	0.872085	0.453265	0.806019	0.11223	0.297227	1.2616	0.797779	0.703464	0.493832	1.3536	0.532316	0.639855	0.109063	0.290172	1.05775	1.14221
1852	FBgn0019936_RpS20	0.639568	0.00836963	0.99752	0.0100674	0.738944	0.00274521	0.0163586	0.639568	0.451641	0.101576	0.00836963	2.88833	0.99752	0.296479	0.0100674	3.21246	0.738944	0.304671	0.0937976	0.00274521	2.99492	1.83918
1853	FBgn0019938_RpI1	0.412801	0.228011	0.842217	0.378888	0.265543	0.22179	0.777884	0.412801	0.903248	0.0842998	0.228011	1.38321	0.842217	0.654168	0.378888	1.47675	0.265543	1.36772	0.116999	0.22179	1.22178	1.18447
1854	FBgn0019940_Rh6	0.61785	0.0314091	0.98854	0.0407122	0.624618	0.0100327	0.0587066	0.61785	0.486942	0.154499	0.0314091	2.26315	0.98854	0.376741	0.0407122	2.50703	0.624618	0.475804	0.140024	0.0100327	2.5747	1.49361
1855	FBgn0019949_Cdk9	0.621283	0.163215	0.921273	0.236783	0.617186	0.206769	0.656692	0.621283	0.481276	0.0654656	0.163215	1.53254	0.921273	0.548544	0.236783	1.69123	0.617186	0.488041	0.0625176	0.206769	1.2625	1.2084
1856	FBgn0019952_Orct	0.976468	0.00320433	0.999636	0.0031563	0.965743	0.00572959	0.018789	0.976468	0.0238261	0.0221699	0.00320433	3.37938	0.999636	0.228095	0.0031563	3.85677	0.965743	0.0348861	0.0221793	0.00572959	2.76287	1.83324
1857	FBgn0019957_ND-42	0.914544	0.0430411	0.989995	0.0498768	0.774154	0.00563211	0.0333204	0.914544	0.089515	0.0629867	0.0430411	2.12097	0.989995	0.368261	0.0498768	2.40976	0.774154	0.257514	0.127025	0.00563211	2.76846	1.59909
1858	FBgn0019960_Mitofilin	0.626684	0.0406697	0.984876	0.0532359	0.749896	0.0506804	0.220513	0.626684	0.472428	0.0888005	0.0406697	2.14639	0.984876	0.395145	0.0532359	2.37878	0.749896	0.289755	0.0880502	0.0506804	1.95418	1.62631
1859	FBgn0019968_Khc-73	0.552012	0.337289	0.789995	0.542727	0.582845	0.52981	0.915288	0.552012	0.602472	0.0397712	0.337289	1.20196	0.789995	0.711718	0.542727	1.30896	0.582845	0.546668	0.0394581	0.52981	0.628296	1.1254
1860	FBgn0019972_Drice	0.460499	0.703312	0.411801	0.704902	0.682994	0.54256	0.958586	0.460499	0.789598	0.0683727	0.703312	0.799477	0.411801	1.10453	0.704902	1.18218	0.682994	0.38467	0.0433973	0.54256	-0.608946	0.870437
1861	FBgn0019982_Gs1l	0.65955	0.594093	0.589672	0.995527	0.705244	0.710204	0.995227	0.65955	0.420252	0.069824	0.594093	0.907001	0.589672	0.911418	0.995527	1.00248	0.705244	0.352062	0.0627256	0.710204	-0.371583	0.962693
1862	FBgn0019985_mGluR	0.60253	0.0029319	0.999115	0.00347075	0.845424	0.0150071	0.017463	0.60253	0.512634	0.091807	0.0029319	3.42668	0.999115	0.25651	0.00347075	3.80172	0.845424	0.168574	0.0553417	0.0150071	2.43221	1.89587
1863	FBgn0019990_Gcn2	0.794769	0.382066	0.800846	0.576347	0.897588	0.948493	0.944326	0.794769	0.230936	0.0533045	0.382066	1.14167	0.800846	0.700185	0.576347	1.28028	0.897588	0.108316	0.029592	0.948493	0.0645987	1.01471
1864	FBgn0020018_Ppox	0.984964	0.204868	0.928566	0.268582	0.983492	0.258441	0.747283	0.984964	0.0151554	0.0244499	0.204868	1.43137	0.928566	0.536491	0.268582	1.634	0.983492	0.0166518	0.02821	0.258441	1.13008	1.20094
1865	FBgn0020224_Cbl	0.102754	0.237607	0.657437	0.550231	0.201014	0.538789	0.478244	0.102754	2.40018	0.0708823	0.237607	1.36453	0.657437	0.844502	0.550231	1.30243	0.201014	1.66576	0.0549469	0.538789	0.614645	1.24501
1866	FBgn0020235_ATPsyngamma	0.903661	0.0727709	0.980228	0.0881166	0.915229	0.0293755	0.163805	0.903661	0.10154	0.068297	0.0727709	1.88779	0.980228	0.414437	0.0881166	2.14264	0.915229	0.0887641	0.0692658	0.0293755	2.17841	1.48798
1867	FBgn0020236_ATPCL	0.064627	0.085027	0.801191	0.226753	0.089065	0.428431	0.330256	0.064627	2.92126	0.194386	0.085027	1.8193	0.801191	0.699815	0.226753	1.71087	0.089065	2.55965	0.170807	0.428431	0.791879	1.14481
1868	FBgn0020238_14-3-3epsilon	0.18619	0.181933	0.796695	0.365236	0.216465	0.251126	0.700269	0.18619	1.74845	0.074579	0.181933	1.48437	0.796695	0.704619	0.365236	1.49363	0.216465	1.58611	0.0821165	0.251126	1.14762	1.24313
1869	FBgn0020248_stet	0.103753	0.873933	0.0675575	0.157827	0.138779	0.125732	0.342747	0.103753	2.38944	0.284836	0.873933	0.615668	0.0675575	1.92058	0.157827	1.87539	0.138779	2.06842	0.299435	0.125732	-1.53115	0.740127
1870	FBgn0020249_stck	0.60078	0.078692	0.965961	0.108869	0.52214	0.0350111	0.192516	0.60078	0.515612	0.0798306	0.078692	1.85335	0.965961	0.4591	0.108869	2.04508	0.52214	0.659739	0.0824845	0.0350111	2.10823	1.43948
1871	FBgn0020251_sfl	0.341131	0.338269	0.725941	0.60575	0.292513	0.66405	0.874596	0.341131	1.10284	0.062084	0.338269	1.20057	0.725941	0.777073	0.60575	1.25634	0.292513	1.26507	0.0686281	0.66405	0.434329	1.08616
1872	FBgn0020255_Ran	0.0720445	0.00990977	0.958691	0.0262261	0.0516117	0.0671007	0.0580049	0.0720445	2.79816	0.117003	0.00990977	2.80547	0.958691	0.477188	0.0262261	2.72186	0.0516117	3.17804	0.10489	0.0671007	1.831	1.77253
1873	FBgn0020257_Ppa	0.940397	0.969759	0.10458	0.129142	0.817255	0.106927	0.484579	0.940397	0.0615408	0.0206732	0.969759	0.448654	0.10458	1.72841	0.129142	1.96684	0.817255	0.202754	0.0365419	0.106927	-1.61216	0.704888
1874	FBgn0020258_ppk	0.301071	0.503382	0.550357	0.952001	0.295883	0.675977	0.878138	0.301071	1.23455	0.125759	0.503382	1.00042	0.550357	0.951212	0.952001	1.02694	0.295883	1.25294	0.139053	0.675977	-0.417959	0.960677
1875	FBgn0020261_pcm	0.530575	0.179546	0.899839	0.27418	0.667388	0.0764145	0.379327	0.530575	0.643228	0.133856	0.179546	1.49025	0.899839	0.58088	0.27418	1.62462	0.667388	0.40821	0.102588	0.0764145	1.77188	1.27033
1876	FBgn0020269_mspo	0.379109	0.0390444	0.974351	0.0601854	0.170155	0.0766309	0.212556	0.379109	0.992142	0.0553651	0.0390444	2.16473	0.974351	0.434812	0.0601854	2.32074	0.170155	1.84604	0.0795996	0.0766309	1.77058	1.71638
1877	FBgn0020270_mre11	0.347484	0.265323	0.792378	0.464925	0.423047	0.532527	0.842754	0.347484	1.08345	0.134682	0.265323	1.31417	0.792378	0.709201	0.464925	1.38187	0.423047	0.877714	0.122582	0.532527	0.624153	1.18362
1878	FBgn0020272_mst	0.489903	0.347657	0.766547	0.576488	0.40377	0.67311	0.922935	0.489903	0.725521	0.173103	0.347657	1.18747	0.766547	0.7361	0.576488	1.28016	0.40377	0.926309	0.15383	0.67311	0.421884	1.09724
1879	FBgn0020277_lush	0.537985	0.311226	0.807101	0.499217	0.558293	0.382674	0.893227	0.537985	0.628948	0.0522856	0.311226	1.24004	0.807101	0.693451	0.499217	1.34849	0.558293	0.590843	0.0549614	0.382674	0.872979	1.20613
1880	FBgn0020278_loco	0.490311	0.0323249	0.984262	0.0453618	0.446152	0.0168501	0.0969361	0.490311	0.724659	0.113272	0.0323249	2.25009	0.984262	0.397909	0.0453618	2.45508	0.446152	0.822436	0.11672	0.0168501	2.38996	1.59721
1881	FBgn0020279_lig	0.837656	0.163241	0.939234	0.217959	0.918262	0.126707	0.556432	0.837656	0.177879	0.0623239	0.163241	1.53246	0.939234	0.517555	0.217959	1.72881	0.918262	0.0854413	0.0383759	0.126707	1.52722	1.3528
1882	FBgn0020280_laf	NA	NA	NA	NA	NA	NA	1	NA	NA	NA	NA	NA	NA	NA	NA	NA	NA	NA	NA	NA	NA	NA
1883	FBgn0020294_ko	0.404409	0.461673	0.638134	0.820967	0.21226	0.734943	0.761056	0.404409	0.92466	0.0520411	0.461673	1.04621	0.638134	0.86344	0.820967	1.10514	0.21226	1.60718	0.0614296	0.734943	0.338558	1.04976
1884	FBgn0020299_stumps	0.585579	0.0807466	0.963998	0.112796	0.719814	0.0544899	0.285509	0.585579	0.541871	0.0621641	0.0807466	1.84201	0.963998	0.464209	0.112796	2.02882	0.719814	0.33129	0.0592628	0.0544899	1.92292	1.51454
1885	FBgn0020300_geko	0.846951	0.0469947	0.987655	0.0562087	0.896943	0.04063	0.220319	0.846951	0.166756	0.0484988	0.0469947	2.08165	0.987655	0.381532	0.0562087	2.35303	0.896943	0.109038	0.0484269	0.04063	2.04729	1.5319
1886	FBgn0020304_drongo	0.0809875	0.0355164	0.907778	0.0897527	0.110542	0.0903135	0.195049	0.0809875	2.66627	0.09586	0.0355164	2.20744	0.907778	0.569363	0.0897527	2.13412	0.110542	2.31912	0.0982521	0.0903135	1.69375	1.72456
1887	FBgn0020305_dbe	0.997788	0.126081	0.963583	0.155821	0.993961	0.12308	0.545264	0.997788	0.00221467	0.010466	0.126081	1.64632	0.963583	0.465265	0.155821	1.88121	0.993961	0.00605829	0.015059	0.12308	1.54197	1.235
1888	FBgn0020306_dom	0.692572	0.493241	0.692325	0.798636	0.744808	0.833236	0.983064	0.692572	0.3705	0.0522843	0.493241	1.01134	0.692325	0.810289	0.798636	1.1193	0.744808	0.296657	0.0421436	0.833236	0.210553	1.03196
1889	FBgn0020307_dve	0.049492	0.0352856	0.871815	0.104012	0.0720105	0.0940031	0.193893	0.049492	3.22622	0.119513	0.0352856	2.21039	0.871815	0.618359	0.104012	2.06607	0.0720105	2.79869	0.114441	0.0940031	1.67465	1.53408
1890	FBgn0020309_crol	0.977936	0.134961	0.959271	0.168978	0.989365	0.111884	0.509297	0.977936	0.0223227	0.0134702	0.134961	1.61639	0.959271	0.475824	0.168978	1.84435	0.989365	0.0106943	0.00873505	0.111884	1.58978	1.28346
1891	FBgn0020312_CG4050	0.529093	0.592211	0.554764	0.962117	0.495113	0.879202	0.983436	0.529093	0.646109	0.0635091	0.592211	0.90888	0.554764	0.946697	0.962117	1.0212	0.495113	0.714588	0.0626181	0.879202	-0.151981	0.920025
1892	FBgn0020369_Rpt6	0.989803	0.273346	0.89339	0.372122	0.935459	0.309603	0.852781	0.989803	0.0102519	0.0139906	0.273346	1.30045	0.89339	0.589905	0.372122	1.48505	0.935459	0.0668219	0.0399625	0.309603	1.01606	1.31798
1893	FBgn0020370_TppII	0.978176	0.175851	0.941734	0.226731	0.953966	0.0852665	0.414175	0.978176	0.022077	0.019356	0.175851	1.49948	0.941734	0.512847	0.226731	1.71091	0.953966	0.0471791	0.0254089	0.0852665	1.72091	1.3172
1894	FBgn0020371_Tim17b2	NA	NA	NA	NA	NA	NA	1	NA	NA	NA	NA	NA	NA	NA	NA	NA	NA	NA	NA	NA	NA	NA
1895	FBgn0020372_TM4SF	0.151327	0.0316813	0.948646	0.0655183	0.0824737	0.0494561	0.175653	0.151327	1.97371	0.110103	0.0316813	2.25923	0.948646	0.499182	0.0655183	2.28079	0.0824737	2.64584	0.106184	0.0494561	1.96464	1.65984
1896	FBgn0020376_Sr-CIII	0.885049	0.797931	0.404153	0.600995	1	0.692892	0.955248	0.885049	0.12246	0.422147	0.797931	0.703302	0.404153	1.11389	0.600995	1.26015	1	0	1.75e-16	0.692892	0.394933	1.15428
1897	FBgn0020377_Sr-CII	0.632467	0.114149	0.949732	0.159846	0.422178	0.103632	0.481298	0.632467	0.463043	0.429692	0.114149	1.68998	0.949732	0.496938	0.159846	1.8696	0.422178	0.879856	0.378138	0.103632	1.62749	1.68108
1898	FBgn0020378_Sp1	0.222497	0.0225509	0.973417	0.0407767	0.156453	0.254973	0.127903	0.222497	1.55661	0.122863	0.0225509	2.4151	0.973417	0.437753	0.0407767	2.50626	0.156453	1.93738	0.119463	0.254973	1.13835	1.37878
1899	FBgn0020379_Rfx	0.154872	0.0671615	0.905174	0.139326	0.228506	0.123626	0.341071	0.154872	1.94845	0.0870292	0.0671615	1.92317	0.905174	0.573194	0.139326	1.93218	0.228506	1.52805	0.0707846	0.123626	1.53973	1.45801
1900	FBgn0020381_Dredd	0.625399	0.0541385	0.978905	0.0721571	0.73043	0.11075	0.283914	0.625399	0.474527	0.0812559	0.0541385	2.01863	0.978905	0.419347	0.0721571	2.23559	0.73043	0.316428	0.0632209	0.11075	1.59483	1.40966
1901	FBgn0020385_pug	0.287571	0.0980081	0.91621	0.171172	0.398193	0.0679722	0.344499	0.287571	1.28311	0.258925	0.0980081	1.7569	0.91621	0.556559	0.171172	1.83848	0.398193	0.940822	0.251232	0.0679722	1.82519	1.33734
1902	FBgn0020386_Pdk1	0.542461	0.0787485	0.962231	0.11243	0.326062	0.289615	0.388679	0.542461	0.620422	0.0577004	0.0787485	1.85303	0.962231	0.468656	0.11243	2.03031	0.326062	1.15039	0.0719915	0.289615	1.05897	1.38379
1903	FBgn0020388_Gcn5	0.658336	0.120764	0.948168	0.167908	0.7382	0.0883335	0.425862	0.658336	0.42213	0.0871182	0.120764	1.66524	0.948168	0.500161	0.167908	1.84723	0.7382	0.305693	0.0689498	0.0883335	1.70425	1.3095
1904	FBgn0020389_Papss	0.461811	0.00216164	0.998933	0.00281155	0.289574	0.106724	0.0129	0.461811	0.786649	0.12573	0.00216164	3.59151	0.998933	0.263137	0.00281155	3.9244	0.289574	1.27576	0.137431	0.106724	1.6131	2.06028
1905	FBgn0020391_Nrk	0.480285	0.206995	0.8726	0.328407	0.53046	0.143579	0.605431	0.480285	0.746026	0.0796417	0.206995	1.42674	0.8726	0.617365	0.328407	1.54235	0.53046	0.643452	0.0703395	0.143579	1.46259	1.30638
1906	FBgn0020392_Nmt	0.980537	0.0271845	0.994922	0.0298235	0.941093	0.0210971	0.120091	0.980537	0.019664	0.022077	0.0271845	2.32907	0.994922	0.330241	0.0298235	2.65845	0.941093	0.0607996	0.0426282	0.0210971	2.30624	1.95296
1907	FBgn0020399_Mst89B	0.526279	0.856394	0.241606	0.379699	0.810098	0.902899	0.80973	0.526279	0.651603	0.415123	0.856394	0.637399	0.241606	1.35695	0.379699	1.47577	0.810098	0.211635	0.197051	0.902899	-0.122	0.974532
1908	FBgn0020407_asun	0.215664	0.203382	0.792266	0.394786	0.30594	0.558875	0.744435	0.215664	1.59008	0.167391	0.203382	1.43463	0.792266	0.70932	0.394786	1.45781	0.30594	1.2176	0.159944	0.558875	0.584513	1.13705
1909	FBgn0020412_JIL-1	0.590843	0.505072	0.657231	0.846144	0.566826	0.628494	0.985302	0.590843	0.532697	0.0341021	0.505072	0.998606	0.657231	0.844704	0.846144	1.08949	0.566826	0.575264	0.0391059	0.628494	0.483848	1.13385
1910	FBgn0020414_Idgf3	0.625202	0.528016	0.644884	0.88182	0.483397	0.965975	0.980992	0.625202	0.474849	0.0704543	0.528016	0.974347	0.644884	0.856812	0.88182	1.06787	0.483397	0.739345	0.0798675	0.965975	-0.0426569	0.979582
1911	FBgn0020415_Idgf2	0.411134	0.550473	0.554822	0.995588	0.417856	0.879593	0.958304	0.411134	0.907464	0.074306	0.550473	0.951093	0.554822	0.946639	0.995588	1.00245	0.417856	0.890569	0.0730147	0.879593	-0.151486	0.939992
1912	FBgn0020416_Idgf1	0.140371	0.173671	0.772206	0.374086	0.146155	0.36617	0.596479	0.140371	2.05592	0.124047	0.173671	1.50502	0.772206	0.730275	0.374086	1.48263	0.146155	2.01171	0.125936	0.36617	0.903671	1.24734
1913	FBgn0020429_GluRIIB	0.00876707	0.0367998	0.684749	0.181643	0.028092	0.238527	0.0514629	0.00876707	5.29907	0.677354	0.0367998	2.19141	0.684749	0.817729	0.181643	1.81152	0.028092	3.88618	0.672177	0.238527	1.17868	1.41105
1914	FBgn0020440_Fak	0.480109	0.0190969	0.990779	0.0263591	0.672719	0.0376526	0.109248	0.480109	0.746406	0.0641403	0.0190969	2.49242	0.990779	0.363315	0.0263591	2.71936	0.672719	0.400105	0.051424	0.0376526	2.07862	1.61285
1915	FBgn0020443_eRF3	0.54464	0.476608	0.670573	0.803848	0.501757	0.921697	0.979443	0.54464	0.616299	0.052512	0.476608	1.02955	0.670573	0.83163	0.803848	1.11597	0.501757	0.700819	0.0605961	0.921697	-0.0982963	0.958037
1916	FBgn0020445_E23	0.263044	0.275837	0.747901	0.516973	0.294999	0.495157	0.839805	0.263044	1.37778	0.0810409	0.275837	1.29627	0.747901	0.755072	0.516973	1.33201	0.294999	1.25611	0.069875	0.495157	0.68213	1.3165
1917	FBgn0020493_Dad	0.544293	0.0436996	0.98062	0.0601657	0.46277	0.0456019	0.235168	0.544293	0.616953	0.0495227	0.0436996	2.11416	0.98062	0.412937	0.0601657	2.32089	0.46277	0.784499	0.0630166	0.0456019	1.99906	1.56154
1918	FBgn0020496_CtBP	0.93368	0.0638266	0.983927	0.0756771	0.91652	0.046494	0.24848	0.93368	0.068731	0.0221386	0.0638266	1.94567	0.983927	0.399389	0.0756771	2.21335	0.91652	0.0873488	0.0232944	0.046494	1.99088	1.39331
1919	FBgn0020497_emb	0.630215	0.191714	0.905156	0.281244	0.697476	0.243334	0.721138	0.630215	0.466687	0.0433832	0.191714	1.46104	0.905156	0.573221	0.281244	1.61304	0.697476	0.363323	0.040248	0.243334	1.16669	1.19146
1920	FBgn0020503_CLIP-190	0.11248	0.399656	0.496207	0.89654	0.105199	0.84585	0.486713	0.11248	2.29987	0.0600418	0.399656	1.11946	0.496207	1.00813	0.89654	1.05912	0.105199	2.37407	0.0607342	0.84585	0.194417	1.07771
1921	FBgn0020506_Amyrel	0.718096	0.920857	0.180581	0.254233	1	0.677936	0.697284	0.718096	0.333715	0.436437	0.920857	0.549212	0.180581	1.48769	0.254233	1.65894	1	0	0	0.677936	-0.415281	0.816553
1922	FBgn0020508_Ag5r2	0.47057	0.606211	0.520686	0.913397	1	0.391153	0.949061	0.47057	0.76718	0.83611	0.606211	0.894944	0.520686	0.982038	0.913397	1.04921	1	0	4.25e-16	0.391153	-0.857528	0.76815
1923	FBgn0020509_Acp62F	NA	NA	NA	NA	NA	NA	1	NA	NA	NA	NA	NA	NA	NA	NA	NA	NA	NA	NA	NA	NA	NA
1924	FBgn0020510_Abi	0.816396	0.0112587	0.997684	0.0125473	0.879442	0.164474	0.0656791	0.816396	0.203815	0.0305572	0.0112587	2.7435	0.997684	0.293542	0.0125473	3.0966	0.879442	0.128852	0.020342	0.164474	1.39018	1.53085
1925	FBgn0020513_ade5	0.172703	0.564367	0.399412	0.827708	0.202066	0.876591	0.679396	0.172703	1.8299	0.197392	0.564367	0.936912	0.399412	1.11976	0.827708	1.10092	0.202066	1.66014	0.200638	0.876591	0.155292	1.04409
1926	FBgn0020518_snoRNA:Me28S-G764	0.909615	0.56175	0.672912	0.887165	1	0.732501	0.992915	0.909615	0.0949432	0.342908	0.56175	0.939572	0.672912	0.829337	0.887165	1.06468	1	2.41e-14	4.42e-15	0.732501	0.341801	1.0725
1927	FBgn0020521_pio	0.108757	0.0652279	0.881158	0.150288	0.161114	0.129323	0.332833	0.108757	2.33716	0.0906344	0.0652279	1.93608	0.881158	0.606332	0.150288	1.89767	0.161114	1.90539	0.082713	0.129323	1.51678	1.48675
1928	FBgn0020545_kraken	0.533949	0.259693	0.844791	0.409526	0.492734	0.981765	0.835384	0.533949	0.636701	0.12902	0.259693	1.32401	0.844791	0.651169	0.409526	1.44087	0.492734	0.719564	0.140572	0.981765	-0.0228559	0.997145
1929	FBgn0020546_iab-4	NA	NA	NA	NA	NA	NA	1	NA	NA	NA	NA	NA	NA	NA	NA	NA	NA	NA	NA	NA	NA	NA
1930	FBgn0020556_bxd	NA	NA	NA	NA	NA	NA	1	NA	NA	NA	NA	NA	NA	NA	NA	NA	NA	NA	NA	NA	NA	NA
1931	FBgn0020616_SA	0.398258	0.496967	0.602104	0.893286	0.335248	0.959094	0.913711	0.398258	0.940651	0.0672304	0.496967	1.00731	0.602104	0.899023	0.893286	1.06104	0.335248	1.12114	0.0735721	0.959094	0.05129	1.00162
1932	FBgn0020617_Rx	0.541642	0.560573	0.590357	0.969872	0.631689	0.848667	0.990727	0.541642	0.621977	0.15082	0.560573	0.94077	0.590357	0.910732	0.969872	1.01682	0.631689	0.4643	0.127167	0.848667	0.19082	1.07274
1933	FBgn0020618_Rack1	0.767449	0.0503914	0.984785	0.062554	0.901156	0.046177	0.24698	0.767449	0.266319	0.175735	0.0503914	2.05053	0.984785	0.395558	0.062554	2.30256	0.901156	0.10433	0.0974112	0.046177	1.99377	1.5161
1934	FBgn0020620_RN-tre	0.113688	0.0829627	0.860265	0.188712	0.193209	0.0488673	0.259634	0.113688	2.28805	0.0712936	0.0829627	1.8301	0.860265	0.632704	0.188712	1.79419	0.193209	1.70847	0.071488	0.0488673	1.96975	1.29392
1935	FBgn0020621_Pkn	0.249898	0.152246	0.856671	0.281549	0.232927	0.239005	0.628792	0.249898	1.4324	0.0728693	0.152246	1.56328	0.856671	0.637065	0.281549	1.61255	0.232927	1.50754	0.0759664	0.239005	1.17748	1.48126
1936	FBgn0020622_Pi3K21B	0.743523	0.908034	0.207557	0.293786	0.838921	0.213416	0.752366	0.743523	0.298407	0.0610902	0.908034	0.568983	0.207557	1.42553	0.293786	1.59318	0.838921	0.176358	0.0515343	0.213416	-1.24423	0.816196
1937	FBgn0020626_Osbp	0.917191	0.330926	0.851971	0.472344	0.912996	0.248296	0.819582	0.917191	0.086613	0.0254102	0.330926	1.21103	0.851971	0.6427	0.472344	1.37447	0.912996	0.0912169	0.0258314	0.248296	1.1545	1.25963
1938	FBgn0020633_Mcm7	0.0871204	0.0938003	0.819277	0.229816	0.0739929	0.60028	0.369499	0.0871204	2.58437	0.476288	0.0938003	1.77616	0.819277	0.680137	0.229816	1.70478	0.0739929	2.76802	0.334842	0.60028	-0.523997	0.831132
1939	FBgn0020637_Lcp65Ag2	0.266894	0.14325	0.870877	0.259615	0.304203	0.106918	0.492604	0.266894	1.36232	0.224941	0.14325	1.59014	0.870877	0.619544	0.259615	1.64943	0.304203	1.22361	0.243372	0.106918	1.6122	1.27545
1940	FBgn0020638_Lcp65Ag1	0.0487328	0.149041	0.666174	0.418707	1	0.149873	0.259005	0.0487328	3.24401	3.22233	0.149041	1.57267	0.666174	0.83594	0.418707	1.4306	1	0	3.41e-16	0.149873	1.43998	1.57017
1941	FBgn0020639_Lcp65Af	NA	NA	NA	NA	NA	NA	1	NA	NA	NA	NA	NA	NA	NA	NA	NA	NA	NA	NA	NA	NA	NA
1942	FBgn0020640_Lcp65Ae	0.757709	0.144882	0.942921	0.196623	0.352354	0.981937	0.609018	0.757709	0.279254	0.304012	0.144882	1.58515	0.942921	0.510571	0.196623	1.77555	0.352354	1.06884	0.517824	0.981937	-0.0226409	0.997938
1943	FBgn0020641_Lcp65Ad	0.2918	0.72017	0.320804	0.592275	1	0.282227	0.863251	0.2918	1.26765	1.69164	0.72017	0.782808	0.320804	1.22575	0.592275	1.26719	1	0	4.64e-16	0.282227	-1.07533	0.703241
1944	FBgn0020642_Lcp65Ac	0.31696	0.445823	0.61483	0.827602	0.34127	0.708905	0.89845	0.31696	1.18024	0.332518	0.445823	1.06428	0.61483	0.886406	0.827602	1.10098	0.34127	1.10241	0.336702	0.708905	0.373327	1.05015
1945	FBgn0020643_Lcp65Ab2	NA	NA	NA	NA	NA	NA	1	NA	NA	NA	NA	NA	NA	NA	NA	NA	NA	NA	NA	NA	NA	NA
1946	FBgn0020644_Lcp65Ab1	NA	NA	NA	NA	NA	NA	1	NA	NA	NA	NA	NA	NA	NA	NA	NA	NA	NA	NA	NA	NA	NA
1947	FBgn0020645_Lcp65Aa	NA	NA	NA	NA	NA	NA	1	NA	NA	NA	NA	NA	NA	NA	NA	NA	NA	NA	NA	NA	NA	NA
1948	FBgn0020646_Lcp65APsi	NA	NA	NA	NA	NA	NA	1	NA	NA	NA	NA	NA	NA	NA	NA	NA	NA	NA	NA	NA	NA	NA
1949	FBgn0020647_KrT95D	0.0084333	0.200829	0.342908	0.799097	0.00830463	0.702898	0.0488047	0.0084333	5.34749	0.0872856	0.200829	1.44029	0.342908	1.19406	0.799097	1.119	0.00830463	5.3667	0.0875913	0.702898	0.381411	1.04099
1950	FBgn0020653_Trxr-1	0.881648	0.0609497	0.983745	0.0733425	0.813238	0.0260516	0.146476	0.881648	0.126332	0.0520124	0.0609497	1.96608	0.983745	0.400182	0.0733425	2.22798	0.813238	0.207729	0.0766628	0.0260516	2.22544	1.5379
1951	FBgn0020655_ArfGAP1	0.846733	0.0426458	0.989049	0.0506694	0.914871	0.00594491	0.0351435	0.846733	0.167015	0.0429796	0.0426458	2.1251	0.989049	0.373867	0.0506694	2.40226	0.914871	0.0891561	0.0370818	0.00594491	2.7508	1.47057
1952	FBgn0020660_eIF4B	0.894474	0.000119184	0.99999	0.000110001	0.961325	0.00133388	0.000659824	0.894474	0.111809	0.0434447	0.000119184	5.39005	0.99999	0.148197	0.000110001	6.12302	0.961325	0.0394789	0.0287397	0.00133388	3.20859	2.58249
[truncated: 15,746 more rows]

## Sheet: male_DODR
		p.value.table.HANOVA	p.value.table.HarmNoisePred1	p.value.table.HarmNoisePred2	p.value.table.HarmScaleTest	p.value.table.robustDODR	p.value.table.robustHarmScaleTest	p.value.table.meta.p.val	details.HANOVA.p.value	details.HANOVA.F	details.HANOVA.diff	details.HarmNoisePred1.p.value	details.HarmNoisePred1.F	details.HarmNoisePred2.p.value	details.HarmNoisePred2.F	details.HarmScaleTest.p.value	details.HarmScaleTest.F	details.robustDODR.p.value	details.robustDODR.F	details.robustDODR.diff	details.robustHarmScaleTest.p.value	details.robustHarmScaleTest.score	details.robustHarmScaleTest.factor
[truncated: 17,698 more rows]
